# Supplementary material for: Impact of breast surgery on survival of patients with stage IV breast cancer: a SEER population-based propensity score matching analysis
Source: PeerJ. 2020 Mar 18;8:e8694. doi: 10.7717/peerj.8694 (PMC7085290; doi:10.7717/peerj.8694)
Supplement: Supplemental Information S1 [file peerj-08-8694-s001.xlsx]

## Sheet: Before prospensity matching
Year of diagnosis	Age at diagnosis（1=20-49，2=50-79）	Race recode (1=White, 2=Black, 3=Other，4=Unknown)	Grade（1=Grade I and Grade II, 2=Grade III and Grade IV, 3=Unknown）	ICD-O-3 Hist/behav, malignant （1=IDC，2=ILC，3=Others）	Derived AJCC T, 7th ed (2010-2015)（1=T1,2=T2,3=T3,4=T4）	Derived AJCC T, 7th ed (2010-2015)（1=T1 and T2, 2=T3 and T4）	Derived AJCC N, 7th ed (2010-2015)(0=N0,1=N1,2=N2,3=N3)	Derived AJCC N, 7th ed (2010-2015)(1=N1 and N2, 2=N2 and N3)	RX Summ--Surg Prim Site (108+)(0=observation,1=BCS,2=Masctomy)	Radiation ( 1=no radiation/unknown 2=radiation)	surgery yes or no (0=no，1=yes)	Chemotherapy recode (1=Yes, 2=no/unknown)	bone (2010+)(1=Yes,2=No,3=Unknown and N/A)	liver (2010+)(1=Yes,2=No,3=Unknown and N/A)	lung (2010+)(1=Yes,2=No,3=Unknown and N/A)	brain (2010+)(1=Yes,2=No,3=Unknown and N/A)	bone metastasis only(1=yes,2=no)	number of metastasis in bone liver lung and brain(5=unknown and no metastasis in the four organs)	number of metastasis in the four organs(5=unknown,0=no metastasis in the four organs)	ER Status Recode Breast Cancer (1990+)(1=Positive,2=Negative,3=Unknown)	PR Status Recode Breast Cancer (1990+)(1=Positive,2=Negative,3=Unknown)	HER2 Recode (2010+)(1=Positive,2=Negative,3=Unknown)	Breast Subtype (2010+)(1=HR+/HER2- ,2=HR+/HER2+,3=HR-/HER2+,4=HR-/HER2- (Triple Negative),5=Unknown)	SEER cause-specific death classification（1=Dead (attributable to this cancer dx)，2=Alive or dead of other cause）	Vital status recode (study cutoff used)（1=Dead，2=Alive）	Survival months
2010	1	1	1	1	2	1	0	1	0	1	0	1	1	2	2	2	1	1	1	1	2	2	1	1	1	39
2010	2	1	2	1	4	2	1	1	1	2	1	2	1	2	2	2	1	1	1	1	1	2	1	1	1	10
2010	1	1	1	1	4	2	3	2	2	2	1	1	2	2	1	2	2	1	1	1	2	3	5	2	2	83
2010	2	1	1	1	4	2	3	2	0	1	0	2	1	2	2	2	1	1	1	1	1	3	5	1	1	1
2010	2	1	3	3	4	2	0	1	0	1	0	2	2	2	1	2	2	1	1	3	3	3	5	1	1	0
2010	2	1	3	1	4	2	0	1	0	1	0	1	2	1	2	2	2	1	1	1	1	3	5	2	1	37
2010	2	1	2	3	1	1	0	1	0	1	0	1	1	2	2	2	1	1	1	3	3	3	5	1	1	66
2010	2	2	2	1	4	2	1	1	2	1	1	2	2	2	2	2	2	5	0	1	1	3	5	1	1	15
2010	2	1	2	2	2	1	1	1	0	1	0	2	2	1	2	2	2	1	1	1	1	2	1	1	1	11
2010	2	1	2	1	1	1	0	1	0	1	0	2	1	2	2	2	1	1	1	1	2	2	1	1	1	2
2010	2	1	2	3	4	2	1	1	0	1	0	2	1	2	2	3	2	5	5	3	3	3	5	1	1	10
2010	2	1	1	1	3	2	2	2	0	2	0	1	1	2	1	2	2	2	2	1	1	2	1	1	1	11
2010	1	2	2	1	4	2	3	2	2	2	1	1	1	1	2	2	2	2	2	1	1	2	1	2	1	14
2010	2	1	2	1	2	1	0	1	1	2	1	1	1	2	2	2	1	1	1	1	1	1	2	2	2	81
2010	2	1	1	3	1	1	0	1	0	1	0	2	3	3	3	3	2	5	5	1	2	2	1	1	1	0
2010	2	1	2	1	4	2	2	2	0	1	0	1	1	1	1	2	2	3	3	1	1	2	1	1	1	45
2010	2	1	1	1	2	1	0	1	1	1	1	2	2	2	1	2	2	1	1	1	1	2	1	1	1	74
2010	2	1	2	1	4	2	1	1	2	2	1	1	2	2	2	2	2	5	0	2	2	1	3	2	2	81
2010	2	1	1	3	2	1	1	1	0	1	0	2	1	2	2	2	1	1	1	1	1	3	5	1	1	2
2010	2	1	1	3	1	1	0	1	0	1	0	2	2	2	1	2	2	1	1	3	3	3	5	1	1	0
2010	2	1	1	3	1	1	0	1	0	1	0	2	1	2	2	2	1	1	1	1	1	3	5	1	1	0
2010	2	1	1	3	4	2	1	1	2	2	1	2	1	2	2	2	1	1	1	1	2	3	5	2	1	27
2010	2	1	1	3	2	1	0	1	0	1	0	2	2	2	2	2	2	5	0	1	1	3	5	1	1	0
2010	1	1	1	1	3	2	1	1	0	1	0	2	1	2	2	2	1	1	1	1	1	3	5	2	2	78
2010	1	3	1	3	3	2	3	2	0	1	0	1	1	1	2	2	2	2	2	1	1	2	1	1	1	24
2010	1	1	1	1	1	1	1	1	2	2	1	1	1	2	2	2	1	1	1	2	2	1	3	2	2	83
2010	2	1	1	1	2	1	0	1	2	2	1	2	1	2	1	2	2	2	2	1	1	2	1	1	1	54
2010	2	3	1	1	3	2	1	1	0	1	0	1	2	1	1	1	2	3	3	2	2	2	4	1	1	10
2010	2	2	2	1	2	1	1	1	0	1	0	2	2	2	1	2	2	1	1	1	2	1	2	1	1	2
2010	2	2	2	1	4	2	1	1	2	1	1	1	2	2	2	2	2	5	0	2	2	1	3	2	2	80
2010	2	3	1	1	3	2	2	2	0	1	0	2	1	2	2	2	1	1	1	1	1	2	1	1	1	23
2010	1	3	2	3	3	2	0	1	2	2	1	1	1	2	2	2	1	1	1	1	1	1	2	1	1	44
2010	1	1	1	2	3	2	2	2	2	2	1	1	1	2	2	2	1	1	1	1	1	2	1	2	2	76
2010	2	1	1	1	2	1	3	2	2	2	1	2	1	2	2	2	1	1	1	1	2	1	2	1	1	21
2010	1	1	2	1	3	2	3	2	1	1	1	1	1	2	2	2	1	1	1	2	2	1	3	2	2	83
2010	2	2	2	1	2	1	1	1	1	1	1	1	1	2	2	2	1	1	1	1	2	2	1	1	1	65
2010	2	1	1	1	4	2	3	2	0	1	0	2	2	2	1	2	2	1	1	1	1	2	1	1	1	42
2010	1	2	2	2	4	2	0	1	0	1	0	1	1	1	1	1	2	4	4	1	1	2	1	1	1	4
2010	2	1	1	3	3	2	1	1	1	2	1	1	1	2	2	2	1	1	1	1	1	2	1	2	2	80
2010	2	3	2	1	3	2	2	2	0	1	0	2	2	1	1	2	2	2	2	1	1	3	5	1	1	0
2010	2	1	2	3	4	2	3	2	2	2	1	1	2	2	1	2	2	1	1	1	2	2	1	1	1	3
2010	2	3	2	1	4	2	1	1	0	1	0	2	2	1	1	2	2	2	2	1	2	2	1	1	1	1
2010	2	1	2	3	1	1	0	1	0	1	0	2	1	1	2	2	2	2	2	3	3	3	5	1	1	3
2010	1	2	1	1	3	2	3	2	2	1	1	1	2	2	1	2	2	1	1	3	3	1	5	1	1	24
2010	2	1	2	1	2	1	0	1	0	1	0	2	2	1	2	2	2	1	1	2	3	2	5	2	1	0
2010	2	1	1	1	2	1	1	1	1	2	1	2	2	2	2	2	2	5	0	1	1	2	1	2	2	83
2010	2	3	1	1	2	1	3	2	0	1	0	2	1	2	1	2	2	2	2	1	1	2	1	2	2	0
2010	2	3	2	1	4	2	0	1	0	1	0	1	1	1	2	1	2	3	3	1	2	2	1	2	1	5
2010	1	1	1	1	1	1	1	1	0	1	0	1	2	1	2	2	2	1	1	1	1	2	1	2	2	76
2010	2	2	2	1	4	2	0	1	0	1	0	1	1	2	1	2	2	2	2	2	2	2	4	1	1	18
2010	2	3	1	3	1	1	3	2	0	1	0	1	1	1	1	2	2	3	3	1	1	2	1	1	1	42
2010	2	1	1	1	2	1	1	1	0	1	0	2	3	3	3	3	2	5	5	1	1	2	1	1	1	35
2010	2	1	2	1	2	1	0	1	0	1	0	2	2	1	1	2	2	2	2	1	2	1	2	1	1	2
2010	2	1	2	1	2	1	0	1	1	2	1	1	1	2	2	2	1	1	1	1	2	2	1	1	1	27
2010	2	1	1	2	2	1	1	1	2	2	1	1	2	2	2	2	2	5	0	1	1	2	1	2	2	73
2010	2	1	1	2	2	1	2	2	2	2	1	1	2	2	2	2	2	5	0	1	1	2	1	1	1	55
2010	2	3	1	1	2	1	0	1	0	1	0	2	1	1	1	2	2	3	3	1	1	2	1	1	1	15
2010	2	3	1	1	2	1	1	1	1	2	1	2	1	2	2	2	1	1	1	1	1	2	1	2	2	77
2010	2	1	1	3	1	1	0	1	0	1	0	2	1	2	2	2	1	1	1	3	3	3	5	1	1	0
2010	2	2	2	1	4	2	1	1	2	1	1	1	1	2	1	2	2	2	2	1	1	1	2	1	1	31
2010	2	2	2	1	2	1	0	1	0	1	0	1	2	1	1	2	2	2	2	1	2	2	1	1	1	15
2010	2	1	1	1	3	2	3	2	1	2	1	1	1	2	2	2	1	1	1	1	1	2	1	2	2	71
2010	1	1	2	1	1	1	0	1	2	2	1	1	1	1	2	2	2	2	2	1	1	1	2	1	1	16
2010	2	1	2	1	2	1	1	1	0	1	0	1	1	2	1	2	2	2	2	1	2	2	1	1	1	2
2010	2	1	1	2	2	1	2	2	2	1	1	2	1	2	2	2	1	1	1	1	1	2	1	2	2	82
2010	2	1	3	1	2	1	2	2	1	2	1	1	2	1	1	2	2	2	2	1	2	1	2	2	2	73
2010	2	1	2	1	3	2	1	1	0	1	0	2	2	1	1	2	2	2	2	3	3	1	5	1	1	15
2010	2	1	1	1	4	2	0	1	0	1	0	1	1	2	2	2	1	1	1	1	1	3	5	2	2	79
2010	2	1	2	1	2	1	1	1	0	1	0	1	2	2	2	2	2	5	0	1	1	2	1	2	2	41
2010	2	2	2	1	2	1	2	2	1	1	1	2	1	1	1	2	2	3	3	1	1	2	1	1	1	56
2010	1	1	3	3	4	2	3	2	2	2	1	1	2	2	2	2	2	5	0	1	1	2	1	1	1	14
2010	1	1	2	1	2	1	1	1	2	1	1	1	2	1	1	2	2	2	2	1	1	2	1	1	1	28
2011	2	3	1	1	3	2	0	1	0	1	0	1	2	2	1	2	2	1	1	1	3	1	5	1	1	19
2010	2	2	1	2	1	1	0	1	0	1	0	1	2	1	2	2	2	1	1	1	1	2	1	1	1	2
2010	2	1	2	1	2	1	1	1	0	1	0	1	1	1	2	2	2	2	2	1	2	1	2	1	1	15
2011	2	2	2	3	4	2	0	1	0	1	0	1	1	2	2	2	1	1	1	2	1	2	1	2	1	4
2011	2	3	1	3	1	1	0	1	0	1	0	2	1	1	3	2	2	5	5	1	3	3	5	2	2	71
2011	1	1	3	1	1	1	1	1	1	2	1	1	2	2	2	2	2	5	0	2	2	1	3	2	2	71
2011	2	1	1	3	4	2	3	2	0	1	0	1	1	2	2	2	1	1	1	2	2	1	3	1	1	13
2011	1	1	1	1	2	1	2	2	0	1	0	1	2	1	2	2	2	1	1	1	3	2	5	1	1	1
2010	2	1	1	3	1	1	1	1	0	1	0	1	1	2	2	2	1	1	1	1	1	2	1	1	1	30
2010	2	1	1	1	2	1	0	1	0	1	0	1	1	1	2	2	2	2	2	1	1	2	1	1	1	1
2011	2	1	1	1	1	1	0	1	0	1	0	2	2	2	2	2	2	5	0	3	3	3	5	1	1	1
2010	2	1	2	1	2	1	0	1	0	1	0	1	2	1	1	2	2	2	2	1	2	2	1	2	1	33
2010	2	1	2	1	3	2	3	2	2	2	1	1	2	2	1	2	2	1	1	2	2	2	4	1	1	5
2011	2	1	1	2	1	1	0	1	0	1	0	1	1	1	2	2	2	2	2	1	1	2	1	1	1	21
2011	2	3	2	1	1	1	3	2	1	2	1	1	2	2	2	2	2	5	0	1	2	1	2	1	1	39
2010	2	1	2	3	4	2	1	1	0	1	0	2	1	2	2	1	2	2	2	1	2	3	5	1	1	3
2011	1	3	3	1	3	2	1	1	2	2	1	1	2	2	2	2	2	5	0	1	1	1	2	1	1	46
2010	1	3	2	1	1	1	1	1	2	2	1	1	1	2	2	2	1	1	1	1	2	2	1	1	1	54
2011	1	2	1	2	2	1	1	1	0	1	0	1	2	1	1	2	2	2	2	1	1	2	1	1	1	50
2011	2	1	1	1	4	2	1	1	0	1	0	1	2	2	1	2	2	1	1	1	1	2	1	2	2	18
2011	2	2	3	1	1	1	1	1	1	2	1	2	1	2	2	2	1	1	1	1	1	3	5	2	1	52
2011	1	3	2	1	1	1	2	2	1	1	1	1	1	2	2	2	1	1	1	2	2	1	3	2	2	70
2011	2	1	1	3	2	1	3	2	0	2	0	2	1	2	2	2	1	1	1	1	1	2	1	1	1	62
2011	1	1	2	1	2	1	2	2	2	2	1	1	1	2	2	2	1	1	1	2	2	1	3	2	2	69
2011	2	3	2	3	4	2	3	2	2	1	1	1	2	2	1	2	2	1	1	2	2	2	4	1	1	17
2011	2	1	3	2	3	2	3	2	2	2	1	2	1	2	2	2	1	1	1	1	1	2	1	1	1	51
2011	2	1	1	3	1	1	1	1	0	1	0	1	1	1	2	2	2	2	2	1	1	2	1	1	1	45
2010	2	1	3	3	2	1	3	2	1	2	1	1	2	1	2	2	2	1	1	1	2	1	2	2	2	77
2011	2	2	2	1	3	2	1	1	1	2	1	1	2	2	1	2	2	1	1	2	2	2	4	1	1	37
2010	2	1	1	1	4	2	3	2	0	1	0	2	1	1	2	1	2	3	3	1	1	2	1	1	1	23
2011	1	3	1	2	1	1	1	1	0	1	0	1	1	1	2	2	2	2	2	2	2	2	4	1	1	1
2011	2	1	3	3	1	1	0	1	1	2	1	2	1	2	2	2	1	1	1	1	1	2	1	2	2	69
2011	2	2	2	3	1	1	1	1	0	1	0	1	1	1	1	2	2	3	3	1	1	2	1	1	1	1
2011	1	2	2	3	4	2	2	2	2	1	1	1	1	2	1	2	2	2	2	1	2	2	1	1	1	11
2011	2	1	1	1	2	1	1	1	0	1	0	2	1	2	1	2	2	2	2	1	1	2	1	1	1	47
2010	2	1	2	3	2	1	2	2	0	1	0	2	1	2	2	2	1	1	1	1	1	1	2	1	1	25
2011	2	1	2	3	4	2	3	2	0	1	0	1	1	1	1	2	2	3	3	2	2	1	3	1	1	2
2010	2	1	1	3	1	1	1	1	0	1	0	1	1	2	2	2	1	1	1	1	2	1	2	1	1	37
2010	2	1	2	1	2	1	0	1	2	1	1	2	1	2	2	2	1	1	1	1	2	2	1	2	2	73
2011	2	1	2	1	4	2	3	2	1	2	1	1	2	2	2	2	2	5	0	2	2	2	4	1	1	16
2011	2	1	2	1	1	1	2	2	0	1	0	1	1	2	1	2	2	2	2	2	2	2	4	1	1	3
2011	2	1	2	1	4	2	2	2	2	2	1	1	1	1	1	2	2	3	3	2	2	1	3	2	2	60
2011	1	1	1	3	3	2	0	1	0	1	0	1	1	2	2	2	1	1	1	1	2	2	1	1	1	57
2011	2	1	2	1	4	2	3	2	0	1	0	1	1	2	2	2	1	1	1	1	2	2	1	1	1	6
2011	2	1	1	3	1	1	1	1	0	1	0	1	1	2	2	2	1	1	1	1	1	2	1	1	1	23
2011	2	3	2	1	2	1	1	1	2	1	1	1	2	1	2	2	2	1	1	2	1	1	2	2	2	70
2011	1	1	2	3	1	1	1	1	0	1	0	1	1	1	2	2	2	2	2	1	1	2	1	1	1	41
2011	2	3	1	3	4	2	1	1	0	1	0	1	1	2	2	1	2	2	2	1	1	3	5	1	1	1
2010	2	1	3	1	2	1	3	2	1	2	1	2	1	2	1	2	2	2	2	1	2	2	1	2	2	81
2011	2	4	1	1	1	1	0	1	0	1	0	1	1	2	2	2	1	1	1	2	2	3	5	1	1	10
2011	2	1	1	3	4	2	1	1	0	1	0	2	1	2	2	2	1	1	1	1	1	2	1	1	1	27
2010	1	1	3	1	4	2	1	1	1	1	1	1	1	1	2	2	2	2	2	1	1	2	1	2	2	73
2011	2	1	3	2	3	2	3	2	1	2	1	1	1	2	2	2	1	1	1	1	1	3	5	1	1	56
2011	2	3	1	1	4	2	3	2	0	1	0	1	2	2	2	2	2	5	0	2	2	2	4	1	1	34
2011	2	2	1	1	4	2	3	2	0	1	0	1	1	2	2	2	1	1	1	2	2	2	4	1	1	14
2011	1	3	3	1	2	1	3	2	2	1	1	1	1	2	2	2	1	1	1	1	1	2	1	1	1	26
2011	2	1	2	1	3	2	1	1	0	1	0	2	1	1	1	1	2	4	4	2	2	1	3	1	1	1
2011	2	1	1	1	1	1	1	1	0	1	0	2	1	2	2	2	1	1	1	1	1	2	1	1	1	10
2011	2	2	3	1	2	1	1	1	1	1	1	2	2	1	2	2	2	1	1	1	1	2	1	2	2	65
2011	2	1	1	1	2	1	0	1	0	1	0	2	1	2	2	2	1	1	1	1	1	2	1	2	2	66
2011	2	3	1	1	1	1	1	1	0	1	0	2	1	2	2	2	1	1	1	1	1	2	1	1	1	26
2011	2	1	1	2	2	1	0	1	0	1	0	1	2	2	2	1	2	1	1	1	2	1	2	2	2	64
2011	2	1	3	1	2	1	1	1	1	2	1	2	1	2	1	2	2	2	2	1	1	2	1	1	1	44
2011	2	1	3	1	4	2	2	2	2	1	1	1	2	2	2	2	2	5	0	2	2	1	3	1	1	32
2011	2	3	1	1	4	2	1	1	0	1	0	2	1	2	2	2	1	1	1	1	1	2	1	1	1	53
2011	2	2	1	3	1	1	0	1	0	1	0	2	1	2	2	1	2	2	2	3	3	3	5	1	1	17
2011	2	1	1	1	2	1	1	1	0	1	0	1	1	2	2	2	1	1	1	1	2	1	2	2	2	66
2011	2	1	1	1	1	1	1	1	0	1	0	1	1	1	3	1	2	5	5	2	2	1	3	1	1	6
2011	1	1	2	3	4	2	1	1	0	1	0	2	1	1	1	2	2	3	3	2	2	2	4	1	1	0
2011	2	3	2	1	4	2	1	1	0	1	0	2	1	2	1	2	2	2	2	1	2	1	2	2	2	0
2011	2	1	1	1	1	1	0	1	0	1	0	2	1	2	2	1	2	2	2	1	1	2	1	2	1	8
2011	2	1	1	1	4	2	1	1	0	1	0	2	2	2	1	2	2	1	1	1	1	2	1	1	1	16
2011	1	1	1	3	2	1	1	1	0	1	0	1	2	2	2	1	2	1	1	1	2	2	1	1	1	4
2011	1	2	3	1	2	1	1	1	2	2	1	1	1	2	2	2	1	1	1	1	1	2	1	2	2	66
2011	1	3	3	1	4	2	3	2	2	2	1	1	2	2	2	2	2	5	0	1	1	1	2	2	2	63
2011	2	2	1	3	1	1	0	1	0	1	0	2	1	2	3	2	2	5	5	1	3	2	5	1	1	53
2011	1	1	2	1	4	2	1	1	0	1	0	1	1	1	2	2	2	2	2	1	1	2	1	1	1	20
2011	2	2	1	3	1	1	0	1	0	1	0	2	1	2	1	2	2	2	2	3	3	3	5	1	1	9
2010	2	1	1	1	1	1	0	1	0	1	0	2	1	2	1	2	2	2	2	1	1	3	5	1	1	30
2011	2	2	2	1	1	1	0	1	0	1	0	2	1	1	1	2	2	3	3	2	2	2	4	1	1	2
2011	2	3	1	1	1	1	0	1	0	1	0	1	1	2	1	2	2	2	2	1	1	2	1	1	1	49
2011	1	1	3	1	3	2	3	2	2	2	1	1	2	2	1	2	2	1	1	2	2	2	4	1	1	15
2011	2	1	1	1	1	1	0	1	0	1	0	2	1	2	2	2	1	1	1	1	1	2	1	1	1	10
2011	1	3	3	1	1	1	1	1	1	2	1	1	2	3	2	2	2	5	5	2	2	2	4	2	2	62
2011	2	2	1	3	1	1	0	1	0	1	0	2	3	3	3	3	2	5	5	1	3	3	5	1	1	32
2011	2	1	1	1	1	1	2	2	0	1	0	2	2	2	2	2	2	5	0	1	3	2	5	2	2	61
2011	1	1	3	1	2	1	1	1	2	1	1	1	1	2	2	2	1	1	1	1	1	2	1	2	2	70
2011	2	1	1	2	1	1	0	1	0	1	0	2	1	1	2	2	2	2	2	1	1	2	1	1	1	27
2011	2	2	1	1	3	2	1	1	0	1	0	2	2	2	2	2	2	5	0	1	1	2	1	1	1	17
2011	2	1	3	1	4	2	2	2	2	1	1	1	1	1	2	2	2	2	2	2	2	1	3	1	1	45
2011	2	3	3	3	2	1	2	2	2	2	1	2	1	2	2	2	1	1	1	1	1	2	1	1	1	45
2011	2	1	1	1	1	1	1	1	0	1	0	2	1	2	1	2	2	2	2	1	2	1	2	1	1	28
2012	2	1	1	3	2	1	3	2	0	1	0	2	2	1	2	2	2	1	1	1	1	2	1	1	1	31
2011	2	3	2	3	4	2	1	1	0	1	0	1	1	2	2	2	1	1	1	1	1	2	1	2	2	61
2010	1	1	1	1	1	1	0	1	0	1	0	1	1	2	2	1	2	2	2	2	2	1	3	2	2	80
2011	2	1	3	1	1	1	2	2	2	1	1	1	1	2	1	2	2	2	2	1	1	2	1	2	2	60
2012	1	3	3	1	2	1	1	1	1	2	1	1	2	2	2	2	2	5	0	1	1	1	2	2	2	59
2011	2	1	2	3	1	1	0	1	0	1	0	2	1	2	2	1	2	2	2	3	3	2	5	1	1	2
2011	2	1	2	3	4	2	1	1	0	1	0	1	1	2	2	2	1	1	1	1	1	2	1	1	1	55
2011	2	3	3	1	1	1	0	1	1	2	1	2	1	1	2	2	2	2	2	1	1	1	2	1	1	28
2010	2	1	3	1	4	2	0	1	1	1	1	2	1	1	1	2	2	3	3	3	3	3	5	1	1	0
2012	2	2	1	2	2	1	1	1	0	1	0	2	1	2	2	2	1	1	1	1	1	2	1	2	2	59
2012	2	1	1	3	1	1	0	1	0	1	0	2	1	2	2	2	1	1	1	1	2	2	1	2	2	57
2012	2	1	2	1	3	2	0	1	0	1	0	2	1	2	2	2	1	1	1	1	1	1	2	1	1	16
2012	2	1	3	1	2	1	2	2	2	2	1	1	1	2	2	2	1	1	1	1	2	2	1	1	1	58
2011	2	1	3	1	3	2	1	1	2	1	1	1	1	2	2	2	1	1	1	1	1	2	1	1	1	39
2012	2	1	1	2	3	2	2	2	0	1	0	1	2	2	2	2	2	5	0	1	1	1	2	1	1	37
2011	2	2	1	2	1	1	1	1	0	1	0	1	2	2	2	2	2	5	0	1	1	1	2	1	1	22
2011	1	1	1	1	4	2	3	2	0	1	0	1	1	2	2	2	1	1	1	1	2	1	2	2	2	63
2012	2	1	1	1	1	1	0	1	0	1	0	2	3	3	3	3	2	5	5	3	3	3	5	1	1	0
2011	2	1	1	3	1	1	0	1	0	1	0	1	1	2	2	2	1	1	1	1	1	2	1	1	1	21
2012	2	1	3	2	3	2	2	2	2	1	1	2	1	2	2	2	1	1	1	1	2	2	1	1	1	44
2012	1	1	3	2	1	1	1	1	1	1	1	2	1	2	2	2	1	1	1	1	1	2	1	1	1	46
2012	2	1	1	1	2	1	1	1	0	1	0	2	1	2	2	2	1	1	1	1	2	1	2	1	1	22
2012	1	1	3	1	3	2	3	2	2	2	1	1	2	2	2	2	2	5	0	1	2	1	2	2	2	59
2012	2	2	1	1	1	1	1	1	0	1	0	2	1	2	2	2	1	1	1	1	1	1	2	2	2	59
2012	2	1	1	3	1	1	0	1	0	1	0	2	1	2	2	2	1	1	1	1	1	3	5	1	1	4
2012	2	1	1	1	1	1	0	1	0	1	0	1	1	1	1	2	2	3	3	1	1	2	1	1	1	39
2012	2	3	1	1	4	2	1	1	0	1	0	2	1	2	1	2	2	2	2	1	1	2	1	2	1	4
2011	1	3	3	3	1	1	0	1	2	1	1	1	2	1	2	2	2	1	1	1	2	2	1	1	1	33
2011	1	2	1	1	4	2	0	1	0	1	0	1	2	1	1	2	2	2	2	1	1	1	2	1	1	41
2012	1	3	3	1	2	1	2	2	2	2	1	1	1	2	2	2	1	1	1	1	1	1	2	1	1	41
2012	2	2	1	2	2	1	1	1	0	2	0	1	1	2	2	2	1	1	1	1	1	1	2	2	2	56
2012	1	1	3	1	3	2	1	1	2	2	1	1	2	2	2	2	2	5	0	2	2	1	3	1	1	21
2012	2	3	1	1	2	1	3	2	0	1	0	1	1	1	2	2	2	2	2	1	2	1	2	2	2	59
2012	2	3	1	3	1	1	1	1	0	1	0	2	1	2	2	2	1	1	1	1	1	2	1	1	1	15
2012	2	1	3	1	2	1	1	1	1	2	1	1	2	2	2	2	2	5	0	1	1	2	1	2	2	56
2012	2	2	3	1	4	2	1	1	2	1	1	1	2	2	2	2	2	5	0	2	2	2	4	2	2	25
2012	2	1	2	1	1	1	1	1	0	1	0	1	2	1	2	2	2	1	1	2	2	2	4	1	1	5
2012	2	3	1	1	2	1	1	1	0	1	0	2	1	2	2	2	1	1	1	1	1	2	1	2	2	53
2012	1	1	1	1	2	1	1	1	0	1	0	1	1	2	2	2	1	1	1	1	1	2	1	1	1	43
2012	2	2	3	1	2	1	0	1	2	2	1	1	2	2	1	2	2	1	1	2	2	2	4	1	1	10
2012	2	3	2	1	2	1	0	1	0	1	0	2	1	2	1	2	2	2	2	1	1	2	1	2	2	0
2012	2	1	2	1	1	1	0	1	0	1	0	1	2	2	2	1	2	1	1	3	3	3	5	2	1	23
2012	1	1	1	1	4	2	2	2	0	1	0	1	1	2	2	2	1	1	1	1	1	2	1	1	1	19
2012	2	1	2	1	2	1	1	1	0	1	0	1	1	2	1	2	2	2	2	1	1	2	1	1	1	43
2012	2	1	1	3	2	1	0	1	0	1	0	1	1	1	1	2	2	3	3	1	1	2	1	1	1	4
2012	2	1	1	3	3	2	1	1	0	1	0	1	2	2	2	2	2	5	0	1	1	2	1	1	1	20
2012	2	2	1	1	4	2	0	1	0	1	0	2	2	2	2	2	2	5	0	1	1	2	1	1	1	18
2012	2	1	3	1	3	2	1	1	1	2	1	1	2	2	2	2	2	5	0	1	2	2	1	2	2	53
2012	2	1	3	3	4	2	3	2	2	1	1	2	2	2	1	2	2	1	1	2	1	2	1	1	1	6
2012	2	3	1	1	2	1	0	1	0	1	0	2	2	2	1	2	2	1	1	1	1	1	2	1	1	0
2012	2	1	3	1	4	2	1	1	2	1	1	2	1	2	2	2	1	1	1	1	1	2	1	2	2	51
2012	2	1	2	1	3	2	1	1	0	1	0	1	2	2	1	1	2	2	2	2	2	2	4	1	1	0
2012	2	3	2	1	4	2	3	2	0	1	0	1	1	2	2	2	1	1	1	2	2	2	4	1	1	13
2012	2	3	3	3	2	1	2	2	1	2	1	1	2	2	2	2	2	5	0	2	2	1	3	2	2	53
2012	2	1	3	1	2	1	0	1	2	1	1	2	1	2	2	2	1	1	1	1	1	2	1	2	2	55
2011	1	1	1	1	1	1	1	1	0	1	0	2	1	2	2	2	1	1	1	1	2	2	1	1	1	39
2012	2	1	1	2	1	1	1	1	0	1	0	1	1	2	2	2	1	1	1	1	1	2	1	1	1	11
2012	2	3	1	1	2	1	2	2	0	1	0	1	1	1	1	2	2	3	3	1	1	2	1	1	1	38
2012	2	3	1	1	2	1	1	1	0	1	0	2	1	2	2	2	1	1	1	1	1	2	1	2	2	58
2011	2	3	1	1	3	2	1	1	0	1	0	1	1	2	2	2	1	1	1	1	1	2	1	1	1	46
2012	2	1	1	3	4	2	0	1	0	2	0	1	2	2	2	1	2	1	1	3	3	3	5	2	2	41
2012	1	3	3	1	2	1	1	1	2	2	1	1	2	2	2	2	2	5	0	1	1	2	1	2	2	52
2012	2	3	2	1	4	2	1	1	0	1	0	1	2	1	1	2	2	2	2	2	2	2	4	1	1	8
2012	2	1	3	1	4	2	1	1	2	1	1	2	1	2	2	2	1	1	1	1	1	2	1	2	2	51
2012	2	1	1	3	4	2	3	2	0	1	0	2	1	2	1	2	2	2	2	1	3	2	5	1	1	2
2012	2	1	1	1	4	2	3	2	0	1	0	2	1	2	2	1	2	2	2	1	1	2	1	1	1	1
2012	2	3	1	2	2	1	0	1	0	1	0	1	1	2	2	2	1	1	1	1	1	2	1	1	1	43
2012	2	1	3	1	4	2	3	2	2	1	1	1	1	2	1	2	2	2	2	1	1	1	2	2	2	55
2012	1	3	2	1	2	1	0	1	0	1	0	1	2	1	2	2	2	1	1	1	1	1	2	2	2	56
2012	2	2	1	2	1	1	0	1	0	1	0	2	2	2	2	2	2	5	0	1	1	2	1	1	1	46
2012	2	3	3	1	4	2	3	2	2	1	1	1	1	2	2	2	1	1	1	2	2	1	3	2	2	46
2012	1	1	1	1	2	1	1	1	0	1	0	2	1	2	2	2	1	1	1	1	1	2	1	1	1	24
2012	2	1	3	1	4	2	0	1	2	2	1	1	1	2	1	2	2	2	2	2	2	2	4	1	1	4
2012	2	3	3	1	1	1	1	1	2	1	1	1	2	2	2	2	2	5	0	2	2	1	3	2	2	51
2012	2	1	2	1	2	1	1	1	0	1	0	2	1	2	1	2	2	2	2	2	2	2	4	2	1	26
2012	2	1	1	1	2	1	0	1	0	1	0	1	1	1	2	2	2	2	2	1	2	1	2	1	1	0
2012	2	1	3	2	3	2	1	1	2	1	1	1	1	2	2	2	1	1	1	1	1	2	1	2	2	50
2012	2	1	1	3	3	2	0	1	0	1	0	2	2	2	1	2	2	1	1	1	1	2	1	2	2	51
2012	2	1	3	1	4	2	1	1	2	1	1	1	1	2	1	2	2	2	2	1	2	2	1	1	1	41
2012	1	1	1	1	3	2	1	1	0	1	0	1	1	2	2	2	1	1	1	1	1	2	1	1	1	16
2012	2	2	1	1	4	2	1	1	0	1	0	2	1	1	1	2	2	3	3	1	1	2	1	1	1	11
2012	2	1	1	2	3	2	1	1	0	1	0	1	2	1	2	2	2	1	1	1	2	2	1	2	2	49
2012	2	1	2	1	3	2	1	1	0	1	0	1	1	2	3	1	2	5	5	1	1	1	2	1	1	28
2012	2	1	3	3	4	2	1	1	2	1	1	1	2	2	1	2	2	1	1	1	2	2	1	1	1	14
2012	2	1	2	3	2	1	1	1	0	1	0	1	1	2	2	2	1	1	1	1	1	2	1	2	2	48
2012	2	1	1	3	4	2	0	1	0	1	0	2	2	2	1	2	2	1	1	2	2	2	4	1	1	0
2012	2	1	3	2	3	2	3	2	2	1	1	2	1	1	2	2	2	2	2	1	2	2	1	2	2	53
2012	2	1	1	2	1	1	0	1	0	1	0	2	1	2	2	2	1	1	1	1	1	2	1	1	1	50
2012	2	1	3	1	1	1	1	1	1	2	1	2	2	2	1	2	2	1	1	1	1	2	1	2	2	54
2012	1	3	3	1	1	1	2	2	1	2	1	1	2	2	1	2	2	1	1	1	1	2	1	2	2	48
2012	1	1	1	1	2	1	1	1	0	1	0	2	1	2	1	2	2	2	2	1	1	2	1	1	1	41
2012	2	1	1	1	2	1	1	1	0	1	0	1	1	2	2	2	1	1	1	2	2	2	4	1	1	9
2012	2	1	1	1	4	2	1	1	0	1	0	1	2	2	2	2	2	5	0	1	1	1	2	2	1	26
2012	2	1	1	2	2	1	2	2	0	1	0	2	2	1	2	2	2	1	1	1	1	1	2	1	1	49
2013	2	1	1	1	4	2	1	1	0	1	0	1	1	2	1	2	2	2	2	1	2	1	2	2	2	47
2012	1	1	3	3	2	1	2	2	1	2	1	2	1	2	2	2	1	1	1	1	1	2	1	1	1	32
2013	1	1	1	2	2	1	1	1	0	1	0	1	1	2	2	2	1	1	1	1	1	2	1	1	1	44
2013	2	2	3	1	1	1	0	1	1	2	1	2	1	2	2	2	1	1	1	1	1	2	1	1	1	15
2013	2	1	1	1	4	2	2	2	0	1	0	1	1	2	2	2	1	1	1	1	1	3	5	1	1	36
2013	2	3	3	1	4	2	1	1	2	1	1	2	1	2	2	2	1	1	1	1	1	2	1	1	1	14
2013	1	3	1	3	4	2	1	1	0	1	0	1	2	2	2	2	2	5	0	2	2	2	4	1	1	2
2013	2	3	2	3	4	2	3	2	0	1	0	1	1	1	1	2	2	3	3	2	2	2	4	1	1	2
2011	2	2	1	3	4	2	0	1	0	1	0	2	2	2	2	2	2	5	0	3	3	3	5	1	1	0
2013	2	1	2	1	1	1	1	1	0	1	0	1	2	1	1	2	2	2	2	3	3	3	5	1	1	4
2013	1	3	3	1	4	2	3	2	2	2	1	1	1	1	2	2	2	2	2	1	2	2	1	1	1	14
2013	2	1	2	1	4	2	0	1	0	1	0	1	2	2	1	2	2	1	1	1	1	1	2	2	2	45
2013	1	1	3	1	2	1	2	2	1	2	1	1	2	2	2	2	2	5	0	1	1	2	1	2	2	46
2013	1	1	3	1	3	2	1	1	2	2	1	1	1	2	2	2	1	1	1	1	1	1	2	2	2	46
2013	1	2	2	1	2	1	1	1	0	1	0	2	2	2	1	2	2	1	1	1	1	2	1	1	1	26
2013	2	1	1	3	3	2	0	1	0	1	0	2	2	2	1	2	2	1	1	1	1	2	1	2	2	44
2013	1	3	3	1	3	2	1	1	1	1	1	1	1	1	2	2	2	2	2	1	1	1	2	2	2	43
2013	1	1	1	2	1	1	3	2	0	1	0	2	2	2	2	2	2	5	0	1	1	2	1	1	1	6
2013	1	1	3	3	4	2	2	2	2	2	1	1	2	2	2	2	2	5	0	1	1	2	1	2	2	44
2013	1	3	2	1	2	1	0	1	0	1	0	2	1	2	2	2	1	1	1	1	1	2	1	1	1	28
2013	1	3	2	1	4	2	1	1	0	1	0	1	1	2	2	2	1	1	1	1	1	2	1	1	1	32
2013	2	3	1	1	2	1	1	1	0	1	0	2	1	2	1	2	2	2	2	2	2	2	4	1	1	2
2013	2	1	2	1	1	1	1	1	0	1	0	1	1	2	2	2	1	1	1	1	2	1	2	1	1	21
2012	1	1	3	1	1	1	1	1	1	2	1	1	1	1	2	2	2	2	2	1	1	1	2	2	2	50
2013	2	2	2	3	3	2	1	1	0	1	0	1	2	1	3	1	2	5	5	2	2	2	4	1	1	2
2012	2	1	3	1	2	1	0	1	1	2	1	2	1	2	2	2	1	1	1	1	1	2	1	2	1	26
2013	2	3	3	1	4	2	3	2	2	1	1	2	2	2	2	2	2	5	0	2	2	2	4	1	1	6
2013	2	1	3	2	1	1	2	2	1	2	1	2	1	2	2	2	1	1	1	1	1	2	1	2	2	44
2013	1	1	2	1	3	2	3	2	2	1	1	1	2	2	1	2	2	1	1	2	2	1	3	1	1	12
2013	2	1	1	1	1	1	0	1	0	1	0	2	1	1	2	2	2	2	2	1	2	2	1	1	1	23
2013	2	1	2	1	1	1	1	1	1	1	1	2	2	1	2	2	2	1	1	2	2	2	4	1	1	2
2013	1	1	1	3	4	2	3	2	0	1	0	1	1	2	1	2	2	2	2	2	2	2	4	2	1	5
2013	1	3	2	1	4	2	2	2	0	1	0	1	2	1	2	2	2	1	1	1	2	2	1	1	1	8
2013	2	2	3	3	3	2	1	1	2	2	1	1	2	1	2	2	2	1	1	1	1	2	1	2	2	42
2013	2	1	2	1	4	2	3	2	2	2	1	1	1	2	2	2	1	1	1	1	1	2	1	1	1	25
2013	2	1	1	2	1	1	0	1	0	1	0	2	1	2	2	2	1	1	1	1	1	3	5	1	1	24
2013	2	3	1	1	4	2	3	2	0	1	0	2	2	1	2	2	2	1	1	1	2	1	2	1	1	16
2013	2	1	2	3	1	1	1	1	0	1	0	1	1	2	2	2	1	1	1	2	2	2	4	1	1	29
2013	2	1	2	1	4	2	3	2	0	1	0	2	1	1	1	1	2	4	4	1	2	2	1	1	1	27
2013	2	3	2	1	2	1	1	1	0	1	0	1	1	2	2	2	1	1	1	1	1	1	2	2	2	41
2013	2	1	1	1	2	1	1	1	0	1	0	1	1	2	2	2	1	1	1	1	1	2	1	2	2	42
2013	2	1	1	1	3	2	1	1	0	1	0	1	1	2	2	2	1	1	1	3	3	3	5	2	2	40
2013	1	3	2	1	2	1	2	2	1	2	1	1	1	2	2	2	1	1	1	1	1	2	1	2	2	43
2013	2	3	1	2	2	1	2	2	0	1	0	2	1	2	2	2	1	1	1	1	2	2	1	1	1	7
2013	2	1	3	1	3	2	2	2	2	2	1	2	1	2	2	2	1	1	1	1	1	2	1	2	2	41
2013	2	1	1	1	4	2	3	2	0	1	0	2	1	2	1	2	2	2	2	1	1	2	1	2	2	40
2013	2	1	1	1	1	1	3	2	0	1	0	1	2	2	1	2	2	1	1	2	2	1	3	2	2	40
2013	1	3	1	1	3	2	1	1	0	1	0	1	1	1	2	2	2	2	2	1	1	3	5	2	2	38
2013	2	1	3	3	4	2	3	2	2	1	1	2	1	2	1	2	2	2	2	1	1	2	1	1	1	35
2013	2	1	1	3	1	1	1	1	0	1	0	1	2	2	1	2	2	1	1	3	3	3	5	1	1	33
2013	1	1	3	3	2	1	3	2	2	1	1	2	2	2	2	2	2	5	0	1	1	2	1	2	2	39
2013	1	1	1	1	3	2	1	1	0	1	0	1	2	1	1	2	2	2	2	2	2	1	3	2	2	39
2013	2	1	2	1	3	2	2	2	2	1	1	2	2	2	1	2	2	1	1	1	1	1	2	2	2	42
2013	1	3	3	1	2	1	1	1	1	2	1	1	1	2	2	2	1	1	1	1	1	2	1	2	2	41
2013	2	1	1	3	4	2	1	1	0	1	0	2	2	1	1	2	2	2	2	3	3	3	5	1	1	0
2013	2	1	3	2	3	2	1	1	2	1	1	2	2	2	2	2	2	5	0	1	1	1	2	2	2	36
2012	2	1	2	1	1	1	0	1	0	1	0	2	2	1	2	2	2	1	1	3	3	3	5	1	1	18
2013	1	1	1	1	2	1	1	1	0	2	0	1	1	2	2	1	2	2	2	1	1	1	2	2	2	38
2013	2	3	1	1	3	2	1	1	0	1	0	1	2	2	2	2	2	5	0	2	2	1	3	2	2	39
2013	2	1	2	1	1	1	1	1	1	1	1	2	1	2	2	2	1	1	1	1	1	1	2	2	2	38
2013	1	3	2	1	4	2	1	1	2	2	1	1	1	2	2	2	1	1	1	2	2	1	3	2	2	41
2013	1	3	2	1	3	2	1	1	0	1	0	1	2	2	2	2	2	5	0	2	2	2	4	1	1	12
2013	2	2	2	1	2	1	0	1	1	1	1	1	2	2	1	2	2	1	1	2	2	2	4	2	2	38
2013	2	1	2	1	2	1	2	2	1	2	1	2	1	2	2	2	1	1	1	1	1	2	1	2	2	38
2012	2	3	2	1	4	2	1	1	0	1	0	1	1	2	2	2	1	1	1	1	2	2	1	2	2	48
2013	2	1	2	1	4	2	1	1	0	1	0	1	2	2	1	2	2	1	1	2	2	2	4	1	1	11
2013	2	2	2	1	4	2	3	2	2	1	1	1	2	1	1	2	2	2	2	2	2	2	4	1	1	6
2013	2	3	2	1	2	1	1	1	2	1	1	1	2	2	2	2	2	5	0	1	1	2	1	1	1	5
2013	2	1	1	2	2	1	0	1	0	1	0	1	1	2	2	2	1	1	1	1	2	2	1	2	2	38
2013	2	3	2	1	2	1	1	1	0	1	0	1	2	2	2	1	2	1	1	1	1	1	2	2	2	38
2013	2	2	1	1	1	1	0	1	0	1	0	2	2	1	2	2	2	1	1	2	2	1	3	2	1	0
2013	2	2	1	1	3	2	1	1	0	1	0	1	1	2	2	1	2	2	2	3	3	3	5	2	2	5
2013	2	3	2	1	1	1	0	1	0	1	0	2	1	2	2	2	1	1	1	1	2	2	1	2	2	0
2013	1	1	2	1	3	2	3	2	2	1	1	1	2	1	2	2	2	1	1	1	1	2	1	1	1	8
2013	2	2	1	3	1	1	3	2	0	1	0	2	1	2	2	2	1	1	1	1	1	2	1	1	1	21
2013	2	1	1	1	1	1	1	1	0	1	0	2	1	2	2	2	1	1	1	1	1	2	1	2	2	37
2011	2	1	1	3	4	2	3	2	0	1	0	2	2	2	2	2	2	5	0	3	3	3	5	1	1	17
2012	2	1	1	3	1	1	0	1	0	1	0	2	2	2	1	2	2	1	1	3	3	3	5	1	1	0
2012	2	1	1	3	1	1	0	1	0	1	0	2	2	2	2	2	2	5	0	3	3	3	5	1	1	0
2014	2	1	2	1	4	2	1	1	0	1	0	1	1	1	1	1	2	4	4	1	1	2	1	1	1	3
2013	2	1	3	3	4	2	3	2	2	2	1	1	1	2	2	2	1	1	1	1	1	2	1	2	2	37
2013	1	3	2	1	4	2	2	2	0	1	0	1	1	1	1	2	2	3	3	1	1	2	1	1	1	5
2013	1	2	1	1	2	1	1	1	0	1	0	1	1	1	2	2	2	2	2	1	1	2	1	2	2	36
2013	2	1	1	2	2	1	0	1	0	1	0	2	2	2	1	2	2	1	1	1	1	2	1	1	1	8
2014	1	1	3	1	2	1	2	2	1	2	1	1	1	2	2	2	1	1	1	1	1	2	1	2	2	35
2014	2	1	2	1	4	2	1	1	1	2	1	2	1	2	2	2	1	1	1	1	2	2	1	2	2	35
2014	2	3	1	1	2	1	1	1	0	1	0	1	1	1	1	2	2	3	3	1	1	1	2	2	2	35
2014	1	3	1	3	2	1	0	1	0	1	0	1	1	2	2	1	2	2	2	1	1	2	1	2	2	34
2014	1	2	1	1	1	1	0	1	0	1	0	1	1	1	1	2	2	3	3	2	2	2	4	1	1	16
2014	2	1	2	3	4	2	0	1	0	1	0	2	1	2	2	2	1	1	1	1	1	2	1	1	1	27
2014	1	3	1	1	1	1	0	1	0	1	0	1	1	1	2	2	2	2	2	1	1	1	2	1	1	6
2014	1	1	1	3	1	1	1	1	0	1	0	1	2	2	2	2	2	5	0	1	1	2	1	2	2	35
2014	2	3	3	2	2	1	2	2	1	2	1	2	1	2	2	2	1	1	1	1	3	2	5	1	1	22
2014	2	1	3	3	1	1	2	2	1	1	1	2	1	2	2	2	1	1	1	1	3	2	5	2	2	34
2014	2	3	2	1	3	2	1	1	0	2	0	2	1	2	2	1	2	2	2	1	1	2	1	1	1	34
2014	2	1	1	1	4	2	0	1	0	1	0	2	2	2	2	2	2	5	0	1	1	3	5	1	1	0
2014	2	2	1	1	2	1	0	1	0	1	0	2	2	2	2	1	2	1	1	1	1	1	2	1	1	1
2014	2	1	1	1	4	2	1	1	0	1	0	2	1	1	1	2	2	3	3	3	3	3	5	1	1	6
2014	2	1	1	2	1	1	3	2	0	1	0	1	1	2	2	2	1	1	1	1	2	3	5	2	2	33
2014	2	1	2	3	1	1	1	1	0	1	0	2	1	2	1	2	2	2	2	1	1	2	1	1	1	1
2014	1	1	1	2	3	2	1	1	0	1	0	1	1	2	2	2	1	1	1	1	1	2	1	2	2	34
2014	2	1	1	3	2	1	1	1	0	1	0	2	2	1	2	2	2	1	1	3	3	3	5	1	1	1
2013	2	1	3	1	4	2	1	1	1	1	1	2	1	2	1	2	2	2	2	1	1	2	1	1	1	1
2014	2	1	2	1	2	1	3	2	2	1	1	1	1	2	2	2	1	1	1	1	1	2	1	2	2	32
2014	2	1	1	3	1	1	0	1	0	1	0	2	1	2	2	2	1	1	1	3	3	3	5	2	2	34
2014	1	1	2	1	2	1	2	2	2	1	1	1	1	2	2	2	1	1	1	1	2	2	1	2	2	32
2014	1	1	1	1	3	2	0	1	0	1	0	1	2	1	2	2	2	1	1	1	1	2	1	2	2	32
2014	2	1	1	1	4	2	1	1	0	1	0	2	1	2	2	2	1	1	1	1	2	2	1	2	2	35
2014	2	1	2	1	2	1	2	2	1	1	1	1	1	1	2	2	2	2	2	1	1	2	1	2	2	25
2014	2	1	2	1	4	2	3	2	2	1	1	1	1	2	1	2	2	2	2	1	1	2	1	2	2	33
2013	2	1	1	3	4	2	1	1	0	1	0	2	1	2	2	2	1	1	1	1	3	3	5	1	1	3
2014	2	3	1	3	4	2	0	1	0	1	0	1	2	2	2	2	2	5	0	2	2	2	4	1	1	20
2014	2	1	3	1	3	2	1	1	1	2	1	2	2	2	1	2	2	1	1	1	2	2	1	2	2	32
2014	2	2	3	1	4	2	2	2	1	1	1	1	2	2	1	2	2	1	1	1	1	2	1	2	2	32
2014	2	1	3	1	2	1	2	2	2	1	1	1	1	2	2	2	1	1	1	1	1	1	2	2	2	32
2014	2	1	2	3	1	1	1	1	0	1	0	1	2	2	2	2	2	5	0	2	2	2	4	2	2	31
2014	1	1	1	1	4	2	1	1	0	1	0	1	1	1	1	1	2	4	4	1	1	2	1	2	2	16
2014	2	1	1	3	3	2	1	1	0	1	0	1	1	1	2	2	2	2	2	2	2	1	3	2	2	29
2014	1	4	2	3	1	1	1	1	0	1	0	2	1	2	1	2	2	2	2	3	3	3	5	2	2	0
2014	2	1	1	1	3	2	0	1	0	1	0	2	1	2	2	3	2	5	5	1	1	2	1	1	1	2
2014	2	1	1	1	3	2	1	1	0	1	0	2	1	1	2	2	2	2	2	1	1	2	1	1	1	6
2014	2	1	2	3	4	2	3	2	0	1	0	1	1	1	1	2	2	3	3	1	1	2	1	2	2	3
2014	2	1	3	1	3	2	1	1	1	2	1	1	1	2	2	2	1	1	1	1	1	2	1	2	2	31
2014	2	2	3	3	3	2	1	1	2	1	1	1	1	2	2	2	1	1	1	1	1	2	1	2	2	30
2014	2	3	1	3	1	1	0	1	0	1	0	2	2	2	1	2	2	1	1	3	3	3	5	2	2	33
2014	2	1	3	2	2	1	3	2	2	2	1	1	1	2	2	2	1	1	1	1	2	2	1	1	1	27
2014	1	3	2	1	4	2	3	2	0	1	0	1	2	2	1	2	2	1	1	2	2	2	4	1	1	17
2014	1	1	2	1	4	2	1	1	2	1	1	1	1	2	2	2	1	1	1	1	1	1	2	2	2	33
2014	2	1	2	1	4	2	0	1	1	1	1	2	1	2	2	2	1	1	1	3	3	3	5	1	1	1
2014	2	1	1	1	1	1	0	1	0	1	0	2	1	2	2	2	1	1	1	1	1	2	1	2	2	30
2014	2	1	1	1	3	2	2	2	0	1	0	2	1	2	2	2	1	1	1	1	2	2	1	2	2	26
2014	1	3	1	1	2	1	0	1	0	1	0	2	1	2	2	2	1	1	1	1	1	2	1	2	2	29
2014	2	3	1	1	2	1	1	1	0	2	0	2	1	1	2	2	2	2	2	1	1	2	1	1	1	14
2014	2	1	3	1	2	1	0	1	1	2	1	1	1	2	2	2	1	1	1	1	1	2	1	2	2	27
2014	1	1	3	1	3	2	2	2	2	2	1	1	1	2	2	2	1	1	1	1	1	2	1	2	2	26
2014	2	1	2	1	2	1	1	1	1	1	1	2	1	2	2	2	1	1	1	1	2	2	1	2	2	29
2014	1	3	1	1	2	1	3	2	0	1	0	1	2	1	2	2	2	1	1	2	2	1	3	2	2	28
2014	2	1	1	1	2	1	1	1	0	1	0	1	1	2	2	2	1	1	1	2	2	1	3	2	2	30
2010	1	1	3	1	4	2	0	1	1	2	1	1	2	2	2	2	2	5	0	2	2	1	3	1	1	65
2014	2	1	1	2	2	1	0	1	0	1	0	2	1	2	2	2	1	1	1	1	1	2	1	2	2	30
2014	2	1	1	3	4	2	1	1	0	2	0	1	2	2	1	2	2	1	1	1	1	2	1	2	2	30
2014	2	2	1	3	4	2	0	1	0	1	0	2	1	1	2	2	2	2	2	3	3	3	5	2	1	0
2014	1	1	1	3	1	1	1	1	0	1	0	2	2	1	1	2	2	2	2	2	2	1	3	2	2	12
2014	1	2	2	1	4	2	0	1	0	1	0	1	1	1	1	1	2	4	4	1	1	1	2	1	1	15
2014	2	3	2	1	4	2	3	2	0	1	0	2	1	1	2	2	2	2	2	1	1	2	1	2	2	26
2014	2	1	1	1	3	2	2	2	0	1	0	1	1	2	2	2	1	1	1	1	2	2	1	2	2	25
2014	2	1	2	1	1	1	2	2	0	1	0	2	1	2	1	1	2	3	3	1	1	2	1	2	2	25
2014	1	1	2	1	2	1	2	2	2	2	1	1	1	2	2	2	1	1	1	1	1	2	1	2	2	26
2014	1	1	3	2	4	2	1	1	1	1	1	1	2	1	2	2	2	1	1	2	1	2	1	2	2	27
2014	2	1	1	3	1	1	0	1	0	1	0	2	2	2	1	2	2	1	1	3	3	3	5	1	1	8
2014	2	1	3	2	2	1	0	1	1	2	1	2	1	2	2	1	2	2	2	1	1	2	1	2	2	33
2014	2	2	2	1	1	1	0	1	0	1	0	2	1	2	2	2	1	1	1	1	2	2	1	2	2	26
2014	1	1	2	1	3	2	1	1	0	1	0	1	1	1	2	2	2	2	2	1	1	1	2	2	2	25
2014	2	2	2	1	3	2	1	1	0	1	0	1	1	2	2	2	1	1	1	2	2	2	4	1	1	10
2014	2	1	1	1	3	2	0	1	0	1	0	2	1	2	1	2	2	2	2	1	1	2	1	2	2	24
2014	2	3	1	1	4	2	2	2	0	1	0	1	2	2	2	2	2	5	0	1	1	2	1	2	2	9
2014	1	2	2	1	3	2	1	1	2	2	1	1	2	1	2	2	2	1	1	2	2	1	3	2	2	26
2014	2	1	1	2	3	2	1	1	0	1	0	2	1	2	2	2	1	1	1	1	2	2	1	2	2	26
2014	2	1	1	1	1	1	0	1	0	1	0	2	1	2	2	2	1	1	1	1	1	2	1	1	1	20
2014	2	3	1	3	4	2	1	1	0	1	0	1	2	1	1	2	2	2	2	2	2	1	3	2	2	24
2014	2	1	3	1	4	2	2	2	2	2	1	1	2	2	2	2	2	5	0	1	1	2	1	2	2	24
2014	2	1	2	3	2	1	1	1	0	1	0	1	1	1	2	2	2	2	2	1	2	2	1	2	2	25
2014	2	1	1	3	1	1	1	1	0	1	0	2	1	2	1	2	2	2	2	1	1	2	1	2	2	26
2014	2	2	1	1	2	1	1	1	0	1	0	1	2	1	1	2	2	2	2	1	1	2	1	1	1	19
2014	2	1	1	1	4	2	1	1	0	1	0	1	2	2	2	2	2	5	0	1	2	2	1	1	1	6
2014	2	1	3	1	2	1	2	2	2	2	1	1	2	1	1	1	2	3	3	1	1	2	1	2	2	26
2012	2	3	1	1	1	1	0	1	0	1	0	1	1	1	2	2	2	2	2	1	1	1	2	2	2	41
2014	2	1	1	3	1	1	0	1	0	1	0	2	1	2	2	2	1	1	1	3	3	3	5	1	1	3
2014	1	3	1	1	4	2	1	1	0	1	0	1	1	2	2	2	1	1	1	1	1	1	2	2	2	25
2013	2	1	1	3	4	2	2	2	0	1	0	2	1	2	2	2	1	1	1	3	3	3	5	1	1	0
2014	2	1	2	1	1	1	0	1	0	1	0	2	1	3	3	3	2	5	5	3	3	3	5	1	1	0
2014	2	1	1	1	3	2	0	1	0	1	0	2	1	2	2	2	1	1	1	1	1	2	1	2	2	24
2015	2	1	2	3	4	2	1	1	2	2	1	1	1	2	2	2	1	1	1	2	2	2	4	1	1	8
2014	2	1	2	1	2	1	0	1	2	1	1	1	2	1	1	2	2	2	2	2	2	2	4	2	2	24
2014	2	2	1	1	3	2	0	1	0	1	0	2	2	1	1	2	2	2	2	1	2	2	1	1	1	4
2014	2	3	3	3	2	1	3	2	2	2	1	1	2	1	2	2	2	1	1	2	2	1	3	2	2	24
2015	1	1	1	1	4	2	1	1	0	1	0	2	1	1	2	2	2	2	2	2	2	1	3	1	1	0
2014	2	1	3	1	2	1	3	2	1	1	1	2	1	2	2	2	1	1	1	1	1	2	1	2	2	24
2014	1	2	1	1	3	2	0	1	0	1	0	1	1	2	2	2	1	1	1	1	1	2	1	1	1	17
2015	2	1	2	1	1	1	0	1	0	1	0	1	2	2	1	2	2	1	1	1	2	1	2	2	2	22
2015	2	1	1	1	2	1	1	1	0	2	0	1	2	2	2	1	2	1	1	1	2	1	2	2	2	23
2015	2	1	3	1	2	1	3	2	2	1	1	2	1	2	2	2	1	1	1	1	1	2	1	2	2	23
2015	2	1	1	3	1	1	0	1	0	1	0	1	1	2	2	2	1	1	1	1	2	2	1	1	1	13
2015	1	3	1	1	2	1	1	1	0	1	0	1	2	2	1	2	2	1	1	1	1	3	5	2	2	19
2014	1	2	3	1	2	1	1	1	2	1	1	1	1	2	2	2	1	1	1	1	1	1	2	2	2	31
2015	2	1	1	3	1	1	0	1	0	1	0	1	2	1	2	2	2	1	1	1	2	1	2	2	2	22
2015	2	3	1	1	4	2	0	1	0	1	0	2	1	2	2	2	1	1	1	1	2	2	1	1	1	21
2015	1	1	1	1	2	1	1	1	0	1	0	2	1	2	2	2	1	1	1	1	1	2	1	2	2	20
2015	1	3	3	1	1	1	1	1	2	2	1	1	1	2	2	2	1	1	1	1	1	2	1	2	2	22
2015	2	1	1	3	3	2	1	1	0	1	0	1	1	2	2	2	1	1	1	1	1	1	2	1	1	13
2015	2	1	1	1	1	1	3	2	0	1	0	2	2	2	2	2	2	5	0	1	1	2	1	2	2	23
2014	1	1	2	1	4	2	3	2	0	1	0	1	2	2	2	2	2	5	0	1	1	2	1	1	1	23
2015	1	3	2	1	2	1	1	1	0	1	0	2	1	2	2	2	1	1	1	1	1	1	2	2	2	21
2014	2	3	2	1	2	1	1	1	1	2	1	1	1	2	2	2	1	1	1	1	1	2	1	2	2	31
2014	1	2	1	3	1	1	0	1	0	1	0	1	1	2	2	2	1	1	1	3	3	3	5	2	2	3
2015	2	3	1	1	3	2	2	2	0	1	0	1	1	2	2	2	1	1	1	1	1	2	1	1	1	2
2015	2	2	2	1	4	2	3	2	0	1	0	1	1	2	2	2	1	1	1	1	1	2	1	2	2	21
2015	1	1	1	1	2	1	1	1	0	1	0	2	2	2	1	2	2	1	1	1	1	2	1	2	2	21
2013	2	1	2	1	2	1	0	1	1	2	1	2	1	2	2	2	1	1	1	1	2	1	2	2	2	42
2015	2	3	2	1	3	2	3	2	0	1	0	2	2	1	3	2	2	5	5	1	2	1	2	1	1	0
2015	1	3	2	1	2	1	1	1	0	1	0	2	1	1	2	2	2	2	2	1	1	2	1	1	1	19
2015	2	1	1	1	1	1	1	1	0	2	0	2	1	2	2	2	1	1	1	1	2	2	1	2	2	19
2015	2	1	2	3	1	1	0	1	0	1	0	1	1	2	2	2	1	1	1	1	2	2	1	2	2	20
2015	2	1	1	1	1	1	0	1	0	1	0	2	2	1	2	2	2	1	1	1	2	2	1	1	1	14
2015	1	1	3	2	2	1	2	2	2	2	1	1	1	2	2	2	1	1	1	1	1	2	1	2	2	19
2014	2	1	1	1	3	2	3	2	0	1	0	2	1	2	3	2	2	5	5	1	1	2	1	1	1	14
2015	1	2	2	1	1	1	1	1	0	1	0	2	1	2	1	2	2	2	2	1	1	2	1	1	1	9
2015	2	1	2	1	2	1	0	1	0	1	0	1	1	2	2	2	1	1	1	1	1	3	5	2	1	17
2015	2	1	1	2	4	2	1	1	0	1	0	2	1	2	2	2	1	1	1	1	1	2	1	2	2	18
2015	1	1	2	1	3	2	1	1	2	2	1	1	2	1	2	2	2	1	1	1	1	1	2	2	2	18
2015	2	1	1	1	1	1	1	1	0	1	0	1	1	1	1	2	2	3	3	1	1	2	1	1	1	3
2015	1	3	1	1	4	2	3	2	0	1	0	1	1	1	1	2	2	3	3	1	1	2	1	2	2	20
2015	2	1	1	3	1	1	0	1	0	1	0	2	1	2	2	2	1	1	1	2	2	2	4	1	1	2
2015	1	1	3	1	2	1	0	1	1	1	1	1	2	2	2	2	2	5	0	1	1	1	2	2	2	19
2015	1	3	2	3	1	1	0	1	0	1	0	1	2	1	2	2	2	1	1	1	1	3	5	2	2	19
2015	2	1	2	1	3	2	0	1	0	2	0	2	1	1	2	1	2	3	3	2	2	1	3	1	1	1
2014	2	2	3	3	2	1	3	2	2	1	1	1	1	1	1	2	2	3	3	2	2	1	3	1	1	14
2015	2	1	2	1	4	2	3	2	2	2	1	1	2	2	1	2	2	1	1	2	2	2	4	1	1	16
2015	2	1	1	3	4	2	0	1	0	1	0	2	1	2	2	2	1	1	1	1	1	2	1	2	2	19
2015	2	3	1	1	2	1	1	1	0	1	0	2	1	2	2	2	1	1	1	1	1	2	1	2	2	18
2015	2	3	2	1	4	2	2	2	2	2	1	1	1	2	2	2	1	1	1	1	1	2	1	2	2	17
2015	2	1	3	3	3	2	0	1	2	1	1	1	2	2	1	2	2	1	1	2	2	2	4	1	1	5
2015	2	1	1	1	4	2	1	1	0	1	0	1	1	1	2	2	2	2	2	1	2	1	2	2	2	17
2014	1	3	2	1	3	2	3	2	2	1	1	2	2	2	2	2	2	5	0	2	1	2	1	1	1	18
2015	1	1	2	1	4	2	1	1	2	2	1	1	1	2	2	2	1	1	1	1	1	2	1	2	2	16
2015	2	1	3	1	2	1	1	1	1	1	1	2	2	2	1	2	2	1	1	1	1	1	2	2	2	16
2015	2	3	1	2	3	2	1	1	0	1	0	1	2	2	2	2	2	5	0	1	1	2	1	2	2	15
2014	2	2	1	3	4	2	1	1	0	1	0	2	2	1	1	2	2	2	2	1	1	2	1	1	1	22
2015	2	2	2	1	2	1	3	2	1	2	1	1	2	2	2	2	2	5	0	1	1	1	2	2	2	14
2015	2	3	2	1	3	2	2	2	1	1	1	2	2	2	2	2	2	5	0	2	2	2	4	2	2	15
2014	1	1	1	1	4	2	2	2	0	2	0	1	1	2	2	2	1	1	1	1	2	1	2	2	2	25
2015	2	2	2	1	2	1	0	1	0	1	0	2	2	1	2	2	2	1	1	2	2	1	3	2	2	15
2015	1	3	1	1	4	2	0	1	0	1	0	1	1	2	2	2	1	1	1	1	1	1	2	2	2	18
2015	2	3	2	1	3	2	3	2	2	2	1	1	2	2	1	2	2	1	1	2	2	1	3	2	2	14
2015	2	3	1	1	3	2	1	1	0	1	0	2	1	2	1	2	2	2	2	1	1	2	1	2	2	14
2015	2	1	1	3	4	2	2	2	0	1	0	1	2	1	1	2	2	2	2	2	2	2	4	1	1	7
2014	1	2	2	1	4	2	0	1	0	1	0	1	1	2	2	2	1	1	1	1	2	2	1	2	2	31
2015	2	3	2	1	3	2	3	2	2	1	1	2	1	2	2	2	1	1	1	2	2	2	4	1	1	12
2015	2	3	1	3	2	1	2	2	0	1	0	1	1	1	1	1	2	4	4	2	2	1	3	1	1	10
2015	1	1	2	1	1	1	1	1	0	1	0	2	1	1	1	3	2	5	5	1	1	2	1	1	1	1
2015	2	2	1	1	1	1	1	1	0	1	0	2	1	2	2	2	1	1	1	1	1	2	1	2	2	3
2015	1	2	1	2	1	1	1	1	0	1	0	1	2	2	2	2	2	5	0	1	1	2	1	2	2	14
2015	2	2	1	2	3	2	1	1	0	1	0	2	1	2	2	2	1	1	1	1	1	2	1	1	1	0
2015	1	2	2	1	4	2	3	2	2	1	1	1	2	2	2	2	2	5	0	1	1	2	1	2	2	13
2015	2	3	1	1	4	2	1	1	0	1	0	2	1	2	2	2	1	1	1	1	1	2	1	2	2	14
2015	2	1	1	2	3	2	1	1	0	1	0	1	1	2	2	2	1	1	1	1	1	2	1	2	2	18
2015	1	1	1	1	1	1	3	2	0	1	0	2	1	2	1	2	2	2	2	1	1	1	2	2	2	13
2015	2	2	1	1	4	2	3	2	0	1	0	1	1	1	2	2	2	2	2	1	2	2	1	1	1	13
2015	2	3	1	1	3	2	1	1	0	1	0	1	1	2	2	1	2	2	2	1	1	2	1	1	1	16
2015	1	3	2	1	2	1	1	1	2	1	1	1	1	2	2	2	1	1	1	1	1	1	2	2	2	5
2015	2	1	1	3	4	2	2	2	0	1	0	2	1	2	2	2	1	1	1	1	1	2	1	2	1	13
2015	2	1	1	3	3	2	1	1	0	1	0	2	2	3	3	2	2	5	5	1	1	2	1	2	2	14
2015	1	1	1	1	3	2	1	1	0	1	0	1	1	1	2	2	2	2	2	1	1	1	2	2	2	12
2015	1	1	2	1	1	1	3	2	0	1	0	2	1	2	2	2	1	1	1	1	2	2	1	2	2	13
2015	1	2	1	1	4	2	3	2	0	1	0	1	2	2	2	1	2	1	1	2	2	2	4	1	1	8
2015	2	1	1	2	1	1	0	1	0	1	0	1	1	2	2	2	1	1	1	1	1	1	2	1	1	1
2015	2	1	2	2	4	2	1	1	0	1	0	1	1	2	2	2	1	1	1	1	1	2	1	2	2	13
2015	2	1	1	1	3	2	1	1	0	1	0	1	1	2	2	2	1	1	1	1	1	1	2	1	1	9
2015	1	1	1	1	1	1	0	1	0	1	0	1	1	1	1	2	2	3	3	1	1	2	1	2	2	13
2015	2	1	1	2	2	1	0	1	0	1	0	1	2	1	2	2	2	1	1	1	1	2	1	1	1	3
2015	2	3	2	1	2	1	1	1	0	1	0	1	2	2	1	2	2	1	1	1	2	1	2	2	2	13
2015	1	3	2	1	3	2	3	2	2	1	1	1	2	1	2	2	2	1	1	2	2	1	3	2	2	15
2015	2	3	1	3	1	1	0	1	0	1	0	2	1	2	2	2	1	1	1	1	3	3	5	1	1	2
2015	1	1	1	1	2	1	1	1	0	2	0	2	1	2	2	2	1	1	1	1	1	2	1	2	2	12
2015	1	2	2	3	1	1	3	2	0	1	0	1	2	1	1	2	2	2	2	1	1	1	2	2	2	13
2015	2	1	2	1	1	1	1	1	2	1	1	1	2	2	2	2	2	5	0	2	2	1	3	1	1	9
2015	2	1	1	1	2	1	1	1	0	1	0	1	1	2	2	2	1	1	1	1	2	1	2	2	2	13
2015	2	1	1	3	1	1	0	1	0	1	0	2	3	1	3	3	2	5	5	3	3	1	5	1	1	0
2013	2	3	3	2	1	1	3	2	2	2	1	1	1	2	2	2	1	1	1	1	1	2	1	2	2	44
2015	1	2	3	2	1	1	1	1	1	1	1	2	2	2	2	2	2	5	0	1	1	2	1	2	2	12
2015	1	1	1	1	4	2	1	1	0	1	0	1	1	1	2	2	2	2	2	1	2	2	1	2	2	14
2015	1	1	2	1	1	1	1	1	0	2	0	1	1	1	2	2	2	2	2	1	1	2	1	2	2	13
2015	1	2	2	1	2	1	3	2	0	1	0	1	1	1	2	2	2	2	2	1	1	1	2	2	2	12
2015	2	1	2	3	2	1	1	1	0	2	0	1	1	1	2	2	2	2	2	1	2	1	2	2	2	12
2015	2	1	1	1	2	1	1	1	0	2	0	1	1	1	2	2	2	2	2	1	1	2	1	2	2	12
2015	2	1	3	1	2	1	3	2	2	2	1	2	1	2	2	2	1	1	1	1	1	2	1	2	2	12
2015	2	1	1	1	1	1	1	1	0	1	0	1	2	1	2	2	2	1	1	1	1	2	1	2	2	13
2015	2	1	1	1	2	1	0	1	0	1	0	2	1	1	3	1	2	5	5	2	2	2	4	1	1	11
2015	2	2	2	1	4	2	3	2	2	1	1	2	1	2	2	2	1	1	1	1	1	1	2	2	2	21
2013	2	1	1	1	2	1	0	1	0	1	0	2	2	2	1	2	2	1	1	1	1	2	1	2	2	41
2015	2	1	2	1	4	2	2	2	2	1	1	1	2	1	1	2	2	2	2	2	2	2	4	2	2	12
2015	1	2	1	2	2	1	0	1	0	1	0	2	1	1	2	2	2	2	2	1	1	2	1	2	2	1
2015	2	3	1	3	1	1	0	1	0	1	0	2	1	1	2	2	2	2	2	3	3	3	5	1	1	0
2015	2	3	1	3	3	2	0	1	0	1	0	2	1	2	1	2	2	2	2	3	3	3	5	1	1	0
2014	2	1	1	3	1	1	0	1	0	1	0	2	1	2	2	2	1	1	1	1	1	2	1	2	2	24
2013	2	1	1	2	1	1	0	1	0	1	0	2	1	1	2	2	2	2	2	1	1	2	1	1	1	1
2012	2	1	2	2	1	1	0	1	0	1	0	1	1	2	2	2	1	1	1	2	2	2	4	1	1	39
2014	2	1	2	3	2	1	2	2	2	2	1	2	1	1	2	2	2	2	2	1	1	2	1	2	2	33
2010	2	1	3	1	3	2	3	2	2	1	1	1	1	2	2	2	1	1	1	1	1	2	1	1	1	11
2010	2	1	2	1	1	1	1	1	0	1	0	2	1	1	1	2	2	3	3	1	1	2	1	2	1	18
2010	2	1	2	1	2	1	1	1	0	1	0	1	2	2	1	2	2	1	1	2	2	1	3	1	1	15
2010	2	1	1	1	2	1	1	1	0	1	0	2	1	2	2	2	1	1	1	1	1	2	1	1	1	59
2010	1	1	3	3	1	1	0	1	1	2	1	2	2	2	2	2	2	5	0	1	1	2	1	2	2	79
2010	2	1	1	3	4	2	0	1	0	1	0	2	1	2	1	2	2	2	2	1	1	2	1	1	1	74
2010	2	1	1	1	1	1	3	2	0	1	0	2	1	1	1	1	2	4	4	1	1	2	1	1	1	1
2010	1	2	2	1	1	1	0	1	0	1	0	1	1	1	3	3	2	5	5	1	1	2	1	1	1	2
2010	2	3	1	3	1	1	0	1	0	1	0	2	1	2	1	2	2	2	2	1	2	2	1	2	2	6
2010	2	3	2	1	4	2	1	1	0	1	0	1	2	3	2	2	2	5	5	1	2	1	2	2	2	50
2010	2	3	3	1	1	1	0	1	1	2	1	2	1	2	2	2	1	1	1	1	2	2	1	2	2	59
2010	2	1	1	1	1	1	0	1	0	1	0	1	3	1	3	3	2	5	5	2	2	1	3	1	1	5
2010	2	1	1	3	1	1	1	1	0	1	0	1	1	1	1	2	2	3	3	1	2	3	5	1	1	39
2010	2	1	1	2	1	1	0	1	0	1	0	2	1	2	2	2	1	1	1	1	1	2	1	2	2	80
2010	2	1	1	2	1	1	0	1	0	1	0	2	1	2	2	2	1	1	1	2	2	1	3	1	1	5
2010	2	1	2	1	4	2	2	2	2	1	1	1	1	2	2	2	1	1	1	1	1	2	1	1	1	37
2010	2	1	2	3	3	2	0	1	2	1	1	2	2	2	1	2	2	1	1	2	2	2	4	1	1	5
2010	2	1	2	1	2	1	3	2	0	1	0	1	2	2	3	2	2	5	5	2	2	2	4	1	1	20
2010	2	1	1	3	1	1	0	1	0	1	0	2	1	2	2	3	2	5	5	1	1	2	1	1	1	66
2010	2	1	1	1	4	2	3	2	0	1	0	2	1	2	1	2	2	2	2	1	1	3	5	1	1	12
2010	2	1	2	1	4	2	3	2	0	1	0	2	1	2	2	2	1	1	1	1	1	2	1	1	1	31
2010	2	1	3	1	4	2	2	2	2	1	1	2	1	2	2	2	1	1	1	1	1	2	1	2	2	79
2010	2	1	2	1	2	1	1	1	0	1	0	1	2	2	1	2	2	1	1	2	2	2	4	1	1	45
2010	2	1	1	1	1	1	1	1	0	2	0	2	1	2	2	2	1	1	1	1	1	2	1	2	2	77
2010	2	1	3	1	1	1	0	1	2	1	1	2	2	2	2	2	2	5	0	1	1	2	1	2	2	82
2010	1	1	1	3	1	1	0	1	0	1	0	1	2	1	2	2	2	1	1	1	1	1	2	2	2	82
2010	2	1	2	1	4	2	3	2	2	1	1	2	1	2	2	2	1	1	1	2	2	2	4	1	1	10
2010	1	2	2	1	3	2	1	1	2	2	1	1	2	1	2	2	2	1	1	1	1	1	2	2	2	80
2010	1	1	2	1	2	1	0	1	0	1	0	1	1	2	2	2	1	1	1	1	1	2	1	1	1	37
2010	2	1	2	3	4	2	1	1	2	1	1	1	2	2	1	2	2	1	1	2	2	2	4	1	1	6
2010	1	1	1	3	3	2	1	1	0	1	0	2	1	2	2	2	1	1	1	1	1	2	1	2	2	75
2010	2	1	1	1	2	1	1	1	0	1	0	1	2	2	2	2	2	5	0	1	2	2	1	2	2	72
2010	2	1	2	3	4	2	1	1	0	1	0	2	1	2	2	2	1	1	1	1	2	3	5	1	1	15
2010	2	1	2	1	1	1	3	2	2	1	1	1	2	2	2	2	2	5	0	1	1	1	2	1	1	43
2010	2	1	2	1	4	2	2	2	0	1	0	2	1	2	2	1	2	2	2	1	2	2	1	1	1	7
2010	1	1	2	3	4	2	1	1	0	1	0	1	1	1	1	2	2	3	3	1	1	1	2	1	1	53
2010	2	1	2	3	4	2	2	2	2	1	1	1	1	1	2	2	2	2	2	1	1	2	1	1	1	35
2010	2	1	2	1	4	2	3	2	0	1	0	2	1	2	2	2	1	1	1	1	1	2	1	1	1	1
2010	1	1	3	1	2	1	1	1	2	2	1	1	1	2	2	2	1	1	1	2	2	2	4	1	1	17
2010	2	1	2	1	4	2	0	1	0	1	0	1	2	1	1	1	2	3	3	1	1	1	2	1	1	2
2010	2	1	1	3	2	1	2	2	0	1	0	2	1	2	1	2	2	2	2	1	2	1	2	1	1	42
2010	2	1	1	3	4	2	1	1	0	1	0	1	1	2	1	2	2	2	2	1	1	1	2	2	2	75
2010	2	1	1	2	4	2	0	1	0	1	0	2	1	2	2	2	1	1	1	1	1	2	1	1	1	27
2010	2	1	2	3	4	2	1	1	0	1	0	2	1	2	1	1	2	3	3	1	1	2	1	2	1	1
2010	2	1	1	1	4	2	2	2	0	1	0	2	2	2	1	2	2	1	1	1	1	2	1	1	1	46
2010	1	2	1	1	4	2	2	2	0	1	0	2	1	2	1	2	2	2	2	1	1	2	1	1	1	24
2010	1	1	1	1	4	2	1	1	0	1	0	2	3	3	3	3	2	5	5	2	2	2	4	1	1	9
2010	2	1	1	3	4	2	1	1	0	1	0	1	1	1	3	3	2	5	5	2	2	1	3	2	2	62
2010	2	1	1	3	1	1	0	1	0	1	0	2	1	2	2	2	1	1	1	1	2	3	5	1	1	18
2010	1	1	2	1	1	1	0	1	0	1	0	1	2	1	2	1	2	2	2	1	1	1	2	2	2	82
2010	2	1	1	2	3	2	1	1	0	1	0	1	1	2	2	2	1	1	1	1	1	2	1	1	1	27
2010	2	1	2	1	4	2	3	2	0	1	0	2	1	2	2	1	2	2	2	1	1	3	5	1	1	0
2010	1	1	1	1	1	1	1	1	0	1	0	2	1	1	2	2	2	2	2	1	1	2	1	2	2	79
2010	1	1	2	3	4	2	1	1	0	1	0	1	1	1	1	2	2	3	3	2	2	3	5	1	1	29
2010	2	1	1	2	2	1	0	1	0	1	0	2	1	2	2	2	1	1	1	1	2	2	1	1	1	3
2010	2	1	1	1	4	2	0	1	0	1	0	2	1	2	2	2	1	1	1	1	1	2	1	2	1	36
2010	2	1	1	2	1	1	0	1	0	1	0	2	1	2	2	2	1	1	1	1	1	3	5	2	2	73
2010	2	1	3	2	3	2	1	1	2	1	1	2	1	2	2	2	1	1	1	1	1	2	1	1	1	66
2010	1	1	2	1	4	2	0	1	0	1	0	1	1	2	2	2	1	1	1	1	1	2	1	1	1	14
2010	2	1	2	1	3	2	0	1	0	1	0	2	1	1	2	2	2	2	2	2	2	2	4	1	1	1
2010	2	1	2	3	1	1	0	1	0	1	0	1	2	1	2	2	2	1	1	1	3	3	5	1	1	3
2010	2	2	2	1	2	1	1	1	0	1	0	1	2	1	2	2	2	1	1	2	2	2	4	1	1	0
2010	1	1	2	3	4	2	1	1	1	2	1	1	1	1	1	1	2	4	4	2	2	2	4	1	1	9
2010	2	1	2	3	1	1	0	1	0	1	0	2	1	1	2	2	2	2	2	1	1	2	1	1	1	16
2010	2	1	1	1	1	1	1	1	0	1	0	2	3	3	3	3	2	5	5	1	2	1	2	2	2	79
2010	2	1	1	1	1	1	0	1	0	1	0	2	1	3	3	3	2	5	5	1	1	2	1	1	1	46
2010	1	1	2	1	4	2	0	1	0	1	0	1	1	2	1	2	2	2	2	1	1	2	1	2	2	44
2010	2	1	3	1	2	1	1	1	1	1	1	2	1	2	2	2	1	1	1	1	1	2	1	2	2	77
2010	2	1	2	1	4	2	2	2	2	1	1	1	1	1	1	2	2	3	3	1	2	1	2	1	1	24
2010	2	1	2	3	4	2	2	2	0	1	0	1	1	2	2	2	1	1	1	1	2	2	1	1	1	8
2010	2	1	2	2	1	1	0	1	0	1	0	2	2	2	2	2	2	5	0	1	3	3	5	1	1	0
2010	2	2	2	1	4	2	1	1	0	1	0	1	2	1	1	2	2	2	2	2	2	1	3	2	2	80
2010	1	1	1	1	2	1	1	1	0	1	0	1	1	2	2	2	1	1	1	1	1	2	1	2	2	83
2010	2	1	1	2	1	1	1	1	0	1	0	2	1	2	2	2	1	1	1	1	1	2	1	1	1	24
2010	1	2	1	1	2	1	3	2	0	1	0	2	2	2	2	2	2	5	0	1	2	2	1	1	1	25
2010	2	1	1	1	4	2	1	1	0	1	0	1	2	2	1	2	2	1	1	2	2	2	4	1	1	23
2010	2	1	1	2	2	1	0	1	0	1	0	2	1	2	2	2	1	1	1	1	1	2	1	2	2	82
2010	2	1	2	1	4	2	1	1	0	1	0	1	1	1	1	2	2	3	3	1	2	2	1	1	1	8
2010	2	1	1	3	4	2	0	1	0	1	0	2	2	1	1	2	2	2	2	1	2	2	1	2	1	1
2010	2	1	2	1	2	1	1	1	1	1	1	2	2	2	1	2	2	1	1	2	2	2	4	1	1	13
2010	2	1	2	3	4	2	1	1	0	1	0	2	1	1	1	2	2	3	3	1	1	2	1	1	1	1
2011	2	1	2	3	4	2	1	1	0	1	0	1	1	1	1	2	2	3	3	1	1	2	1	1	1	10
2011	2	1	1	1	2	1	1	1	0	1	0	1	1	1	1	2	2	3	3	1	2	2	1	2	2	69
2010	2	1	1	1	4	2	1	1	0	1	0	1	1	2	2	2	1	1	1	1	2	2	1	1	1	42
2011	2	1	1	2	2	1	1	1	0	1	0	2	2	2	2	2	2	5	0	1	1	2	1	1	1	44
2011	2	1	1	3	2	1	0	1	0	1	0	2	1	2	2	2	1	1	1	1	1	2	1	2	2	67
2010	2	1	1	2	4	2	3	2	0	1	0	1	1	2	2	2	1	1	1	1	2	2	1	1	1	14
2011	2	2	1	1	1	1	0	1	0	1	0	2	1	2	2	2	1	1	1	1	1	2	1	2	2	10
2011	1	1	2	1	2	1	0	1	0	1	0	2	1	2	2	2	1	1	1	1	1	2	1	1	1	33
2011	2	1	2	1	4	2	2	2	2	2	1	1	2	2	1	2	2	1	1	1	1	2	1	1	1	33
2011	2	1	2	1	1	1	0	1	0	1	0	2	1	1	2	2	2	2	2	1	1	2	1	1	1	1
2010	2	1	1	1	4	2	3	2	0	1	0	2	1	1	1	2	2	3	3	1	1	2	1	2	2	78
2011	1	1	2	3	4	2	1	1	0	1	0	1	1	2	2	2	1	1	1	1	1	2	1	1	1	40
2011	2	1	1	1	1	1	0	1	0	1	0	1	2	1	2	2	2	1	1	1	2	2	1	2	1	0
2011	1	1	1	1	4	2	0	1	0	1	0	1	2	2	2	2	2	5	0	1	2	1	2	2	2	63
2011	1	1	1	1	1	1	0	1	0	1	0	2	1	2	2	2	1	1	1	1	1	2	1	1	1	49
2011	2	1	2	1	4	2	1	1	0	1	0	2	1	2	1	2	2	2	2	1	2	2	1	1	1	3
2011	2	1	1	1	1	1	0	1	0	1	0	2	1	3	3	1	2	5	5	1	1	3	5	1	1	12
2011	1	1	2	1	2	1	1	1	0	1	0	1	2	1	2	2	2	1	1	1	2	1	2	2	2	66
2011	2	1	1	3	1	1	0	1	0	1	0	2	1	3	3	3	2	5	5	1	2	2	1	1	1	8
2011	1	1	1	3	1	1	0	1	0	2	0	1	1	1	2	1	2	3	3	2	2	1	3	2	2	63
2011	2	1	2	1	4	2	1	1	0	1	0	1	1	1	1	3	2	5	5	2	2	1	3	1	1	0
2011	2	1	1	1	4	2	1	1	0	1	0	2	1	2	1	1	2	3	3	1	1	3	5	1	1	1
2011	1	2	3	1	2	1	1	1	2	1	1	1	1	3	3	3	2	5	5	1	2	2	1	1	1	20
2011	1	2	1	1	4	2	3	2	0	1	0	1	2	2	2	2	2	5	0	1	1	2	1	1	1	36
2011	2	1	2	1	4	2	1	1	0	1	0	1	2	2	1	2	2	1	1	1	1	1	2	2	2	66
2011	1	2	1	1	4	2	1	1	0	1	0	1	1	2	2	2	1	1	1	2	2	2	4	1	1	18
2011	2	1	2	1	2	1	1	1	2	1	1	2	2	2	1	2	2	1	1	1	1	2	1	2	2	65
2011	1	1	1	1	3	2	3	2	0	1	0	1	1	1	1	2	2	3	3	2	2	2	4	1	1	1
2011	2	1	2	1	2	1	0	1	0	1	0	2	1	3	2	2	2	5	5	1	1	2	1	1	1	16
2011	2	1	1	1	4	2	1	1	0	1	0	2	1	1	1	2	2	3	3	1	1	2	1	1	1	15
2011	1	1	2	1	4	2	1	1	1	1	1	1	1	1	1	2	2	3	3	2	2	1	3	1	1	19
2011	2	1	3	3	1	1	3	2	1	1	1	2	2	2	1	2	2	1	1	3	3	3	5	2	2	67
2011	1	1	1	3	4	2	1	1	0	2	0	1	1	2	2	2	1	1	1	2	2	2	4	2	1	43
2011	2	1	1	3	1	1	0	1	0	1	0	1	1	2	1	2	2	2	2	1	1	2	1	1	1	9
2011	1	2	2	1	4	2	2	2	0	1	0	1	2	1	2	2	2	1	1	1	2	1	2	1	1	53
2011	2	1	1	2	4	2	1	1	0	1	0	2	1	1	2	2	2	2	2	1	1	1	2	2	2	65
2011	2	1	1	2	1	1	1	1	0	2	0	1	1	2	2	1	2	2	2	1	1	2	1	1	1	26
2011	1	2	2	1	4	2	3	2	1	1	1	1	2	2	1	2	2	1	1	2	2	2	4	1	1	17
2011	2	1	1	1	1	1	1	1	0	1	0	2	1	2	2	2	1	1	1	1	1	2	1	1	1	4
2011	2	1	1	3	1	1	1	1	0	2	0	2	1	2	2	2	1	1	1	1	1	2	1	1	1	61
2011	1	1	2	1	1	1	0	1	1	2	1	1	1	2	2	2	1	1	1	1	1	2	1	1	1	46
2011	1	1	1	3	4	2	1	1	0	1	0	1	1	2	1	2	2	2	2	1	1	2	1	1	1	56
2011	2	1	1	1	1	1	1	1	0	1	0	1	1	2	1	2	2	2	2	1	1	2	1	2	1	28
2011	1	1	1	1	4	2	3	2	0	1	0	1	1	2	1	1	2	3	3	2	2	2	4	1	1	5
2011	2	1	1	1	1	1	3	2	0	1	0	2	1	1	3	3	2	5	5	2	2	2	4	2	1	0
2011	2	1	2	1	1	1	3	2	0	1	0	2	1	2	2	2	1	1	1	1	1	2	1	1	1	13
2011	2	1	2	1	4	2	3	2	0	2	0	1	1	2	2	2	1	1	1	1	1	1	2	1	1	57
2011	2	1	2	1	2	1	0	1	0	1	0	2	1	2	2	2	1	1	1	1	1	2	1	1	1	14
2011	1	1	1	3	1	1	0	1	0	1	0	1	1	2	2	2	1	1	1	1	1	2	1	1	1	63
2011	2	1	2	1	1	1	1	1	0	1	0	1	1	2	2	2	1	1	1	2	2	2	4	1	1	14
2011	2	1	1	1	1	1	0	1	0	1	0	2	1	1	1	2	2	3	3	1	1	3	5	1	1	0
2011	2	3	1	3	4	2	1	1	0	1	0	1	1	1	2	3	2	5	5	1	1	2	1	1	1	1
2011	2	1	2	1	1	1	1	1	1	1	1	1	3	3	3	3	2	5	5	1	1	1	2	1	1	26
2011	1	1	2	1	1	1	1	1	2	1	1	1	1	2	2	2	1	1	1	1	1	1	2	2	2	69
2011	2	1	1	1	1	1	1	1	0	1	0	1	1	2	2	2	1	1	1	1	1	2	1	1	1	27
2011	2	1	2	1	1	1	1	1	0	1	0	2	1	2	2	2	1	1	1	1	1	3	5	2	2	6
2011	2	1	3	1	1	1	1	1	2	2	1	1	2	2	2	2	2	5	0	1	1	1	2	2	2	60
2011	2	1	3	3	2	1	1	1	2	1	1	2	1	2	2	2	1	1	1	1	1	2	1	2	1	53
2011	2	1	2	1	2	1	2	2	2	1	1	1	1	1	2	2	2	2	2	1	1	2	1	1	1	22
2011	2	1	1	3	1	1	0	1	0	1	0	1	2	2	2	2	2	5	0	2	2	3	5	1	1	8
2011	2	1	1	3	1	1	1	1	0	1	0	2	1	2	2	2	1	1	1	1	1	2	1	2	2	61
2011	2	1	1	2	1	1	0	1	0	1	0	1	1	1	2	1	2	3	3	1	1	2	1	1	1	1
2011	2	1	1	3	4	2	1	1	0	1	0	2	1	2	2	2	1	1	1	2	2	2	4	1	1	0
2011	2	3	1	1	4	2	1	1	0	1	0	1	2	2	2	2	2	5	0	1	1	2	1	2	2	4
2011	2	1	1	1	4	2	1	1	0	1	0	1	2	2	2	2	2	5	0	2	2	2	4	1	1	10
2011	2	1	1	1	1	1	0	1	0	1	0	2	1	1	1	1	2	4	4	1	2	2	1	1	1	4
2011	2	1	1	1	2	1	1	1	0	1	0	1	1	2	2	2	1	1	1	1	1	3	5	2	2	55
2011	1	1	1	3	2	1	1	1	0	1	0	2	1	2	2	2	1	1	1	1	1	2	1	2	2	61
2011	2	1	2	1	3	2	1	1	0	2	0	1	1	2	1	1	2	3	3	2	2	2	4	1	1	6
2011	2	1	1	3	4	2	1	1	0	1	0	2	2	2	1	2	2	1	1	1	3	3	5	1	1	0
2010	2	1	1	1	2	1	1	1	0	1	0	2	2	1	1	2	2	2	2	1	1	2	1	2	2	68
2011	2	1	2	1	2	1	2	2	0	1	0	2	1	2	2	2	1	1	1	1	1	2	1	2	2	63
2011	2	1	2	1	4	2	1	1	0	1	0	2	3	3	1	3	2	5	5	1	1	2	1	2	2	61
2011	2	1	1	3	1	1	2	2	0	1	0	2	1	1	2	2	2	2	2	3	3	3	5	1	1	0
2011	2	1	1	3	1	1	3	2	0	1	0	2	1	1	1	1	2	4	4	1	1	3	5	2	1	2
2011	2	2	2	1	2	1	1	1	0	1	0	1	1	1	2	2	2	2	2	2	2	1	3	1	1	0
2011	2	1	2	2	2	1	0	1	0	1	0	1	1	2	2	2	1	1	1	1	1	2	1	2	2	62
2011	2	1	2	1	4	2	2	2	0	1	0	1	1	1	2	3	2	5	5	1	1	2	1	2	2	53
2011	2	1	1	1	2	1	1	1	0	1	0	1	1	2	1	2	2	2	2	1	1	2	1	2	2	67
2011	2	1	3	1	4	2	1	1	2	1	1	1	1	2	2	2	1	1	1	1	1	2	1	2	1	37
2011	2	1	1	2	2	1	2	2	0	1	0	2	1	2	2	2	1	1	1	1	2	2	1	1	1	26
2011	2	1	2	1	2	1	0	1	0	1	0	2	1	2	1	2	2	2	2	2	2	1	3	1	1	2
2011	2	1	1	3	4	2	3	2	0	1	0	1	2	1	1	2	2	2	2	3	3	1	5	2	1	25
2011	2	2	1	3	1	1	1	1	0	1	0	2	1	1	1	2	2	3	3	1	1	3	5	1	1	0
2011	2	1	2	3	2	1	1	1	0	1	0	1	1	2	2	2	1	1	1	2	2	2	4	1	1	2
2011	2	1	2	1	4	2	3	2	0	1	0	1	2	2	2	2	2	5	0	2	2	2	4	1	1	12
2011	2	1	1	3	3	2	0	1	0	1	0	2	1	2	2	2	1	1	1	1	1	2	1	1	1	38
2011	1	1	2	1	2	1	1	1	2	1	1	1	2	1	1	2	2	2	2	1	2	1	2	2	2	64
2011	1	1	2	3	1	1	1	1	1	1	1	2	2	2	2	2	2	5	0	1	1	1	2	2	2	64
2011	2	2	3	1	2	1	1	1	1	1	1	2	3	3	1	3	2	5	5	1	2	2	1	1	1	18
2011	2	1	2	1	3	2	1	1	2	2	1	1	2	1	2	2	2	1	1	2	2	1	3	2	2	65
2012	2	1	2	1	2	1	1	1	1	2	1	1	1	2	2	2	1	1	1	1	1	2	1	1	1	56
2011	2	1	2	1	3	2	3	2	1	2	1	1	2	2	2	2	2	5	0	1	2	1	2	2	1	6
2012	2	1	2	3	1	1	1	1	0	1	0	2	1	1	2	1	2	3	3	1	1	2	1	1	1	0
2012	1	1	1	1	2	1	1	1	0	1	0	2	1	2	1	2	2	2	2	1	1	2	1	2	2	56
2012	2	1	1	2	1	1	0	1	0	1	0	1	1	2	2	1	2	2	2	1	1	2	1	1	1	11
2012	2	1	2	1	4	2	1	1	0	1	0	2	1	2	2	2	1	1	1	1	1	2	1	1	1	39
2012	2	1	1	1	3	2	1	1	0	1	0	1	1	1	2	2	2	2	2	2	2	1	3	2	2	57
2012	2	1	2	1	4	2	0	1	0	1	0	2	1	2	2	2	1	1	1	1	1	2	1	1	1	8
2012	2	1	3	1	2	1	0	1	2	1	1	1	2	2	2	2	2	5	0	2	2	1	3	2	2	58
2012	2	2	2	1	2	1	2	2	2	1	1	1	2	1	2	2	2	1	1	2	2	2	4	1	1	31
2012	2	1	1	3	1	1	0	1	0	1	0	2	1	2	2	2	1	1	1	3	3	3	5	2	1	13
2012	2	1	1	2	1	1	1	1	0	1	0	1	3	3	1	2	2	5	5	1	1	2	1	1	1	33
2012	2	1	1	3	4	2	1	1	0	1	0	2	2	3	3	1	2	5	5	1	2	2	1	1	1	1
2012	2	1	3	2	2	1	1	1	1	1	1	1	1	3	2	2	2	5	5	2	2	1	3	2	2	50
2012	2	1	1	1	4	2	1	1	0	1	0	2	1	2	2	2	1	1	1	1	1	2	1	2	2	59
2012	1	1	3	1	1	1	0	1	1	1	1	1	2	1	2	2	2	1	1	1	1	1	2	1	1	0
2012	2	1	1	1	1	1	0	1	0	1	0	1	2	1	2	2	2	1	1	1	1	1	2	2	2	58
2012	2	1	3	3	2	1	1	1	1	1	1	1	2	1	2	2	2	1	1	2	2	1	3	2	2	53
2012	2	2	1	1	1	1	1	1	0	1	0	2	1	2	2	2	1	1	1	1	1	2	1	2	2	52
2012	2	2	2	1	3	2	1	1	0	1	0	2	2	1	2	2	2	1	1	2	2	2	4	1	1	1
2012	2	1	2	1	3	2	3	2	0	1	0	1	2	1	2	2	2	1	1	2	2	1	3	2	2	52
2012	2	1	1	1	1	1	1	1	0	1	0	2	1	2	2	2	1	1	1	1	1	3	5	1	1	12
2012	1	2	3	1	4	2	3	2	2	2	1	1	2	2	2	2	2	5	0	1	2	1	2	1	1	42
2012	2	2	2	3	2	1	3	2	2	1	1	1	1	2	2	2	1	1	1	1	2	2	1	1	1	14
2012	2	1	2	1	2	1	1	1	1	1	1	1	1	2	2	2	1	1	1	1	2	1	2	2	2	50
2012	2	1	2	1	3	2	3	2	0	1	0	1	1	2	2	1	2	2	2	2	2	1	3	2	2	48
2012	2	1	2	1	4	2	2	2	2	1	1	1	2	1	2	2	2	1	1	2	2	2	4	2	1	3
2012	2	2	2	1	4	2	3	2	2	1	1	1	1	1	1	1	2	4	4	2	2	2	4	1	1	12
2012	2	1	2	3	4	2	3	2	2	2	1	1	2	2	2	2	2	5	0	2	2	2	4	1	1	39
2012	2	1	1	2	2	1	0	1	0	1	0	1	1	1	2	2	2	2	2	1	1	2	1	1	1	19
2012	2	1	2	1	4	2	1	1	0	1	0	1	1	2	2	2	1	1	1	1	1	2	1	1	1	21
2012	2	1	2	3	4	2	1	1	2	1	1	2	2	1	1	2	2	2	2	2	2	2	4	1	1	2
2012	2	1	1	1	4	2	3	2	0	1	0	1	1	2	3	2	2	5	5	1	1	2	1	1	1	28
2012	2	1	1	3	4	2	2	2	0	1	0	2	1	1	1	3	2	5	5	1	1	2	1	1	1	27
2012	2	1	2	3	4	2	2	2	2	1	1	1	2	2	1	2	2	1	1	1	1	1	2	1	1	27
2012	2	1	2	3	3	2	0	1	0	1	0	2	1	2	2	2	1	1	1	1	1	2	1	1	1	47
2012	2	1	1	3	2	1	1	1	0	1	0	2	1	2	2	2	1	1	1	1	1	3	5	1	1	23
2012	2	1	1	1	3	2	1	1	0	1	0	1	1	2	2	2	1	1	1	1	2	1	2	2	2	55
2012	2	1	2	1	2	1	3	2	2	1	1	1	1	1	1	2	2	3	3	1	1	2	1	1	1	12
2012	2	3	2	1	4	2	3	2	0	1	0	2	2	2	2	2	2	5	0	1	2	1	2	1	1	53
2012	2	1	1	1	3	2	0	1	0	1	0	1	1	2	2	2	1	1	1	1	2	1	2	2	2	52
2012	2	1	1	3	1	1	0	1	0	1	0	1	1	2	1	2	2	2	2	1	1	2	1	1	1	31
2012	2	2	1	1	1	1	1	1	0	1	0	1	1	1	1	1	2	4	4	1	2	1	2	1	1	1
2012	2	1	1	1	3	2	2	2	0	1	0	2	1	1	1	3	2	5	5	1	1	1	2	1	1	2
2012	2	1	2	1	4	2	1	1	0	1	0	2	2	2	1	2	2	1	1	1	1	2	1	1	1	50
2012	2	1	1	3	4	2	3	2	0	1	0	1	1	2	1	2	2	2	2	1	1	2	1	1	1	25
2012	2	1	2	1	1	1	2	2	0	1	0	1	1	2	1	2	2	2	2	2	2	1	3	1	1	13
2012	2	1	1	1	4	2	2	2	0	1	0	2	1	2	2	2	1	1	1	1	1	2	1	1	1	24
2012	2	1	2	1	3	2	1	1	0	1	0	2	1	2	1	2	2	2	2	1	2	2	1	1	1	2
2012	2	1	2	3	1	1	0	1	0	1	0	1	1	1	1	2	2	3	3	1	1	3	5	1	1	28
2012	2	1	2	1	3	2	1	1	1	1	1	1	2	2	1	2	2	1	1	2	2	2	4	1	1	22
2012	2	1	1	3	1	1	0	1	0	1	0	2	1	1	1	1	2	4	4	1	1	2	1	1	1	0
2012	2	1	1	2	1	1	0	1	0	1	0	2	1	2	2	2	1	1	1	1	3	3	5	2	2	8
2012	2	1	2	1	2	1	1	1	2	2	1	1	1	2	2	2	1	1	1	2	2	2	4	1	1	36
2012	2	1	2	1	2	1	1	1	1	2	1	1	2	2	2	2	2	5	0	1	1	1	2	1	1	47
2012	2	2	3	2	2	1	1	1	1	1	1	2	2	2	2	2	2	5	0	1	1	2	1	2	2	57
2012	2	1	1	2	1	1	1	1	0	1	0	2	1	2	2	2	1	1	1	1	1	2	1	2	2	57
2012	1	1	1	3	1	1	0	1	0	1	0	2	2	2	1	2	2	1	1	3	3	3	5	2	1	0
2012	2	1	1	1	1	1	0	1	0	1	0	2	1	2	2	2	1	1	1	1	1	2	1	2	1	15
2012	2	1	1	1	2	1	1	1	0	1	0	1	2	1	2	2	2	1	1	1	2	1	2	1	1	18
2012	2	2	3	1	2	1	3	2	2	1	1	1	1	2	2	2	1	1	1	1	2	1	2	2	2	52
2012	2	2	1	3	1	1	0	1	0	1	0	1	1	1	1	2	2	3	3	1	2	3	5	1	1	0
2012	2	1	1	1	1	1	2	2	0	1	0	1	1	2	1	2	2	2	2	2	2	1	3	2	2	48
2012	2	2	2	1	4	2	2	2	0	1	0	2	1	1	1	3	2	5	5	1	1	1	2	1	1	0
2012	1	1	3	1	1	1	1	1	2	1	1	1	1	2	2	2	1	1	1	1	2	1	2	2	2	50
2012	1	1	3	1	3	2	1	1	2	1	1	1	1	2	2	2	1	1	1	1	1	2	1	1	1	43
2012	2	1	2	1	4	2	2	2	2	2	1	1	1	2	2	2	1	1	1	1	1	2	1	2	2	59
2012	2	1	2	1	4	2	1	1	0	1	0	2	1	2	2	1	2	2	2	1	1	1	2	1	1	0
2012	2	1	1	1	2	1	1	1	0	2	0	1	1	2	2	2	1	1	1	2	2	2	4	1	1	13
2012	2	1	3	3	2	1	1	1	2	2	1	1	2	2	2	2	2	5	0	1	1	3	5	1	1	41
2012	2	1	2	1	1	1	1	1	0	1	0	1	2	2	1	2	2	1	1	2	2	1	3	1	1	9
2012	2	2	2	1	4	2	0	1	2	1	1	2	1	2	2	2	1	1	1	2	2	1	3	1	1	6
2012	2	1	1	3	2	1	0	1	0	1	0	2	1	2	2	2	1	1	1	1	1	2	1	2	2	57
2012	2	1	2	3	3	2	1	1	0	1	0	1	1	2	2	2	1	1	1	1	1	2	1	1	1	43
2012	2	2	2	3	2	1	1	1	2	1	1	1	2	2	2	2	2	5	0	2	2	1	3	2	2	55
2012	2	1	1	1	4	2	1	1	0	1	0	2	2	2	1	2	2	1	1	1	1	2	1	2	2	53
2012	2	1	2	1	1	1	1	1	0	1	0	2	1	2	2	2	1	1	1	1	1	2	1	1	1	47
2012	1	1	1	1	3	2	1	1	0	1	0	1	2	1	2	2	2	1	1	1	1	1	2	1	1	15
2012	1	3	1	1	2	1	1	1	0	1	0	2	1	2	2	2	1	1	1	1	1	2	1	1	1	29
2012	2	2	1	1	2	1	1	1	0	1	0	2	1	1	1	2	2	3	3	2	2	1	3	1	1	3
2012	2	1	3	1	2	1	1	1	2	2	1	1	1	2	2	2	1	1	1	1	1	2	1	1	1	45
2012	2	1	1	3	1	1	0	1	0	1	0	1	1	1	1	1	2	4	4	1	1	2	1	1	1	31
2012	2	1	1	2	1	1	1	1	0	1	0	2	1	2	2	2	1	1	1	1	1	2	1	1	1	9
2012	2	1	2	1	1	1	0	1	0	1	0	1	1	1	1	3	2	5	5	2	2	1	3	1	1	33
2012	2	1	1	1	2	1	1	1	0	1	0	1	1	2	2	2	1	1	1	1	1	2	1	1	1	21
2012	2	1	2	1	1	1	1	1	0	1	0	1	2	1	2	2	2	1	1	2	2	1	3	2	2	56
2012	1	1	3	1	2	1	1	1	2	1	1	1	1	2	2	2	1	1	1	1	1	2	1	2	2	51
2012	2	3	1	1	4	2	1	1	0	1	0	2	1	2	2	2	1	1	1	1	1	2	1	2	2	1
2012	2	1	2	3	4	2	3	2	0	1	0	1	2	2	2	2	2	5	0	2	1	1	2	1	1	12
2012	2	1	2	3	4	2	2	2	0	1	0	1	1	2	2	2	1	1	1	1	1	2	1	1	1	28
2012	2	1	2	1	4	2	3	2	1	1	1	1	2	2	2	2	2	5	0	2	2	2	4	1	1	20
2012	2	1	2	1	3	2	3	2	1	1	1	2	2	2	1	2	2	1	1	1	1	2	1	2	1	30
2012	2	2	2	1	1	1	0	1	0	1	0	1	1	1	2	1	2	3	3	2	2	3	5	1	1	9
2012	2	1	2	1	2	1	0	1	0	1	0	1	1	2	2	2	1	1	1	1	1	1	2	1	1	30
2012	2	1	2	1	1	1	3	2	1	2	1	1	1	2	2	2	1	1	1	2	2	1	3	2	2	48
2012	2	1	1	1	2	1	0	1	0	1	0	2	2	2	2	1	2	1	1	1	1	2	1	1	1	22
2012	2	1	1	1	1	1	1	1	0	1	0	1	1	1	1	2	2	3	3	1	2	1	2	2	2	51
2012	2	1	1	2	1	1	0	1	0	1	0	2	1	2	2	2	1	1	1	1	1	2	1	2	2	49
2012	2	1	1	1	2	1	1	1	0	1	0	2	1	2	2	2	1	1	1	2	2	2	4	1	1	8
2012	1	1	1	1	2	1	1	1	0	1	0	2	1	1	2	2	2	2	2	1	1	2	1	1	1	14
2012	2	1	2	1	3	2	1	1	0	1	0	1	1	1	2	2	2	2	2	2	2	1	3	1	1	18
2012	2	1	2	1	4	2	1	1	2	2	1	1	2	2	1	2	2	1	1	2	2	2	4	1	1	27
2012	2	1	1	1	2	1	1	1	0	1	0	2	1	2	2	2	1	1	1	1	1	2	1	2	2	49
2012	2	1	2	3	2	1	3	2	2	2	1	1	2	2	2	2	2	5	0	1	1	2	1	2	2	48
2012	2	1	3	1	3	2	3	2	1	2	1	2	1	2	2	2	1	1	1	1	2	2	1	1	1	45
2012	2	2	1	1	1	1	2	2	0	1	0	2	1	2	2	2	1	1	1	1	1	2	1	2	1	8
2013	2	1	2	2	1	1	0	1	0	1	0	1	1	2	2	2	1	1	1	1	1	1	2	2	2	47
2013	2	2	2	1	3	2	3	2	0	1	0	1	2	2	1	2	2	1	1	1	1	2	1	2	2	4
2013	2	4	2	3	3	2	0	1	0	1	0	1	1	2	2	2	1	1	1	2	2	2	4	2	2	46
2013	2	1	1	1	4	2	0	1	0	1	0	1	2	1	2	2	2	1	1	1	1	2	1	1	1	5
2013	2	1	2	1	2	1	0	1	0	1	0	1	1	2	2	2	1	1	1	2	2	1	3	1	1	42
2013	2	1	1	1	3	2	0	1	0	1	0	2	1	2	2	2	1	1	1	1	1	2	1	2	1	6
2013	1	1	2	1	2	1	1	1	0	1	0	1	1	1	3	3	2	5	5	2	2	2	4	1	1	5
2013	2	1	2	1	1	1	3	2	2	1	1	2	1	2	2	2	1	1	1	1	1	2	1	1	1	44
2013	2	1	1	1	2	1	1	1	0	1	0	2	1	2	1	2	2	2	2	1	1	2	1	2	2	40
2013	2	1	1	3	1	1	1	1	0	1	0	2	2	2	2	2	2	5	0	1	1	2	1	2	2	47
2013	2	2	1	3	1	1	0	1	0	1	0	2	2	2	1	2	2	1	1	3	3	3	5	2	1	0
2013	2	2	1	1	2	1	1	1	0	1	0	2	1	1	1	2	2	3	3	1	1	2	1	2	1	7
2013	2	1	1	3	1	1	0	1	0	1	0	2	1	2	2	2	1	1	1	3	3	2	5	2	1	0
2013	2	2	2	1	1	1	1	1	0	1	0	2	1	2	2	2	1	1	1	1	1	2	1	2	1	46
2013	2	1	1	1	4	2	2	2	0	1	0	2	1	1	2	1	2	3	3	1	1	2	1	2	2	43
2013	2	1	2	1	4	2	3	2	0	1	0	1	2	2	2	2	2	5	0	1	2	2	1	2	2	43
2013	2	1	2	1	4	2	2	2	2	2	1	1	2	2	2	2	2	5	0	2	2	2	4	1	1	29
2012	2	2	2	1	3	2	2	2	0	1	0	1	1	2	2	2	1	1	1	1	2	2	1	1	1	14
2013	1	1	2	1	3	2	1	1	2	1	1	1	2	1	2	2	2	1	1	2	2	2	4	2	2	41
2013	1	1	2	1	2	1	1	1	0	1	0	1	1	1	2	2	2	2	2	2	2	1	3	2	2	44
2013	2	1	2	1	4	2	2	2	0	1	0	2	1	1	1	2	2	3	3	1	1	1	2	2	2	43
2013	2	1	2	1	4	2	2	2	0	1	0	2	1	2	2	2	1	1	1	1	2	1	2	2	2	44
2013	2	3	2	1	2	1	2	2	0	1	0	2	1	2	2	2	1	1	1	3	3	3	5	2	2	45
2013	2	2	2	1	1	1	1	1	0	1	0	1	1	2	2	2	1	1	1	2	2	2	4	1	1	11
2013	2	1	2	1	4	2	1	1	0	1	0	2	1	2	3	2	2	5	5	1	1	2	1	1	1	37
2013	2	1	1	1	2	1	1	1	0	1	0	2	1	2	2	2	1	1	1	1	2	2	1	2	2	39
2013	1	2	1	1	4	2	0	1	0	1	0	1	1	1	2	2	2	2	2	2	2	1	3	1	1	0
2013	1	1	2	3	4	2	1	1	2	2	1	1	2	2	1	2	2	1	1	1	1	1	2	2	2	38
2013	2	1	1	3	1	1	0	1	0	1	0	2	1	2	2	2	1	1	1	1	1	2	1	2	2	42
2013	1	1	3	1	1	1	0	1	1	1	1	2	2	1	2	2	2	1	1	1	1	1	2	2	2	40
2013	1	1	2	1	4	2	1	1	2	1	1	1	2	2	1	2	2	1	1	2	2	1	3	2	2	45
2013	2	1	1	1	4	2	1	1	0	1	0	1	1	2	1	2	2	2	2	1	2	2	1	1	1	19
2013	2	1	1	3	1	1	0	1	0	1	0	2	1	1	3	3	2	5	5	1	1	2	1	1	1	0
2013	2	1	2	1	3	2	1	1	0	1	0	1	2	1	2	2	2	1	1	2	2	2	4	1	1	36
2013	1	1	1	1	4	2	3	2	0	1	0	1	1	1	1	1	2	4	4	1	2	2	1	1	1	34
2013	2	2	1	3	4	2	2	2	0	1	0	2	1	2	1	2	2	2	2	1	1	2	1	2	1	1
2013	2	1	1	3	4	2	0	1	0	1	0	2	1	2	2	2	1	1	1	1	2	2	1	2	2	45
2013	2	1	2	3	2	1	1	1	1	1	1	1	1	2	2	2	1	1	1	1	1	2	1	2	2	36
2013	2	2	1	1	3	2	0	1	0	1	0	2	2	1	1	2	2	2	2	1	2	2	1	2	2	43
2013	1	1	2	1	2	1	1	1	0	1	0	1	2	2	1	2	2	1	1	1	1	2	1	2	2	38
2013	2	1	1	1	3	2	3	2	0	1	0	1	1	2	2	2	1	1	1	1	1	2	1	1	1	13
2013	2	1	1	1	4	2	1	1	0	1	0	1	1	2	2	2	1	1	1	2	2	1	3	2	2	36
2013	2	1	2	2	1	1	1	1	0	1	0	2	1	2	2	2	1	1	1	1	2	2	1	1	1	2
2013	2	1	2	3	4	2	0	1	0	1	0	1	1	3	1	3	2	5	5	2	2	2	4	2	2	43
2013	2	1	2	3	2	1	1	1	1	2	1	1	2	2	2	2	2	5	0	2	2	2	4	1	1	23
2013	2	2	1	1	4	2	3	2	0	1	0	1	1	3	3	1	2	5	5	1	2	1	2	1	1	16
2013	1	1	1	1	2	1	1	1	0	1	0	1	1	1	1	2	2	3	3	1	1	2	1	1	1	37
2013	2	1	1	3	4	2	1	1	0	1	0	1	2	2	1	2	2	1	1	1	2	1	2	2	2	40
2013	2	4	3	2	3	2	1	1	2	1	1	2	1	2	2	2	1	1	1	1	2	2	1	2	2	43
2013	2	1	1	1	4	2	0	1	0	1	0	2	2	2	2	2	2	5	0	1	2	1	2	1	1	13
2013	2	1	1	1	1	1	1	1	0	2	0	2	1	2	2	1	2	2	2	1	2	2	1	1	1	12
2013	2	1	1	1	1	1	0	1	0	1	0	2	1	1	2	2	2	2	2	1	1	2	1	2	2	38
2013	1	2	1	3	4	2	1	1	0	1	0	1	1	2	1	2	2	2	2	1	1	1	2	2	2	4
2013	2	1	1	3	1	1	0	1	0	1	0	2	2	2	2	2	2	5	0	2	2	2	4	1	1	11
2013	2	1	2	3	4	2	0	1	0	1	0	2	1	2	1	2	2	2	2	2	2	2	4	1	1	0
2013	2	1	2	1	1	1	0	1	0	1	0	2	2	2	1	2	2	1	1	1	1	1	2	2	2	37
2013	2	1	1	3	2	1	0	1	0	1	0	2	1	2	1	2	2	2	2	1	1	2	1	2	2	40
2013	2	1	1	1	1	1	1	1	0	1	0	2	1	1	2	2	2	2	2	1	2	2	1	1	1	0
2013	2	1	2	1	4	2	2	2	0	1	0	1	2	1	1	2	2	2	2	2	2	1	3	2	2	15
2013	2	2	3	3	4	2	3	2	2	1	1	1	2	1	3	2	2	5	5	2	2	2	4	1	1	32
2013	2	1	1	1	1	1	1	1	0	2	0	2	1	3	3	2	2	5	5	1	1	3	5	2	2	37
2013	2	1	1	3	2	1	1	1	0	1	0	2	1	1	1	2	2	3	3	1	1	2	1	2	1	30
2013	1	1	2	3	2	1	1	1	0	1	0	2	1	2	2	2	1	1	1	2	2	2	4	2	1	5
2013	2	2	3	3	4	2	1	1	1	1	1	1	1	2	1	2	2	2	2	2	2	2	4	1	1	9
2013	2	1	2	2	1	1	0	1	0	1	0	2	1	2	2	2	1	1	1	1	1	2	1	2	2	43
2013	2	1	1	1	2	1	1	1	0	1	0	2	1	2	2	2	1	1	1	1	1	2	1	2	2	47
2013	2	1	2	1	4	2	1	1	0	1	0	1	2	1	2	2	2	1	1	2	2	1	3	2	2	38
2013	2	1	2	1	2	1	0	1	1	2	1	1	2	1	2	2	2	1	1	2	2	1	3	1	1	33
2013	2	2	2	1	1	1	0	1	0	1	0	1	1	2	2	1	2	2	2	2	2	1	3	1	1	5
2013	2	1	2	3	1	1	0	1	0	1	0	1	1	1	2	2	2	2	2	1	1	2	1	1	1	10
2013	2	1	1	2	3	2	2	2	0	1	0	2	2	2	2	2	2	5	0	1	1	2	1	2	2	47
2013	2	1	2	1	2	1	1	1	0	1	0	1	1	1	2	2	2	2	2	1	1	1	2	1	1	41
2013	2	1	2	1	3	2	1	1	0	2	0	1	1	2	2	2	1	1	1	1	1	3	5	1	1	24
2013	1	1	2	1	4	2	1	1	0	1	0	1	1	1	2	2	2	2	2	1	1	1	2	1	1	25
2013	2	1	2	1	4	2	1	1	0	1	0	1	2	2	1	2	2	1	1	1	2	2	1	1	1	8
2013	2	1	1	1	1	1	1	1	0	2	0	2	1	2	1	2	2	2	2	2	2	2	4	1	1	1
2013	1	1	1	3	4	2	1	1	0	1	0	1	2	2	1	2	2	1	1	2	2	1	3	1	1	40
2013	2	2	1	3	4	2	1	1	0	1	0	1	2	1	1	1	2	3	3	2	2	2	4	1	1	2
2013	2	1	1	2	1	1	1	1	0	1	0	1	1	2	2	2	1	1	1	1	2	2	1	1	1	4
2013	1	1	2	3	1	1	3	2	2	2	1	1	2	1	2	2	2	1	1	2	2	1	3	2	2	37
2013	1	1	2	1	4	2	1	1	0	1	0	1	1	1	1	1	2	4	4	1	1	1	2	1	1	4
2013	2	1	1	1	4	2	0	1	0	1	0	2	1	2	2	2	1	1	1	1	1	3	5	2	2	38
2013	2	1	1	1	2	1	1	1	0	1	0	2	1	2	2	2	1	1	1	1	1	2	1	2	2	36
2013	2	1	2	1	4	2	1	1	0	1	0	1	1	2	1	2	2	2	2	2	2	1	3	2	2	36
2013	2	1	1	1	1	1	0	1	0	1	0	1	2	1	2	2	2	1	1	1	1	2	1	1	1	28
2013	2	1	1	2	1	1	0	1	0	1	0	1	2	2	1	2	2	1	1	1	1	2	1	1	1	40
2013	2	1	1	2	4	2	1	1	0	1	0	2	1	2	2	2	1	1	1	1	1	2	1	1	1	14
2013	1	1	2	3	3	2	1	1	2	2	1	1	2	2	2	2	2	5	0	2	2	2	4	1	1	13
2011	1	1	3	1	1	1	0	1	2	1	1	1	1	2	2	2	1	1	1	1	1	2	1	1	1	37
2014	2	1	1	2	4	2	1	1	0	1	0	2	1	2	2	2	1	1	1	1	1	2	1	2	2	32
2014	2	2	2	2	4	2	0	1	0	1	0	1	1	2	2	2	1	1	1	1	1	2	1	2	2	28
2014	2	1	1	1	1	1	0	1	0	1	0	1	2	1	2	2	2	1	1	1	1	2	1	1	1	24
2014	2	2	2	1	3	2	3	2	0	1	0	1	2	2	1	2	2	1	1	1	1	1	2	1	1	19
2014	2	1	1	3	1	1	0	1	0	1	0	2	1	2	2	2	1	1	1	1	1	2	1	1	1	3
2014	2	4	1	2	1	1	0	1	0	1	0	2	1	2	2	2	1	1	1	3	3	3	5	2	2	33
2014	2	1	2	2	1	1	2	2	2	2	1	1	2	2	2	2	2	5	0	1	1	2	1	2	2	35
2014	2	2	2	3	4	2	1	1	0	1	0	2	1	1	2	2	2	2	2	1	2	3	5	1	1	1
2014	2	2	2	3	2	1	1	1	0	1	0	1	1	1	2	2	2	2	2	2	2	2	4	1	1	3
2014	1	1	2	1	1	1	1	1	0	1	0	2	2	1	2	2	2	1	1	1	1	2	1	2	2	27
2014	2	1	1	3	4	2	1	1	0	1	0	2	1	2	1	2	2	2	2	1	1	1	2	2	2	31
2014	1	2	2	3	4	2	1	1	0	1	0	1	2	1	1	2	2	2	2	1	2	2	1	2	2	2
2014	2	1	1	3	1	1	0	1	0	1	0	2	1	2	2	2	1	1	1	1	2	1	2	2	2	33
2014	2	1	3	2	4	2	3	2	2	1	1	1	2	2	2	2	2	5	0	1	1	2	1	2	2	34
2014	1	1	3	1	2	1	3	2	1	2	1	1	2	2	2	2	2	5	0	2	2	2	4	2	2	35
2014	2	1	1	1	4	2	0	1	0	1	0	2	2	2	3	2	2	5	5	3	3	3	5	1	1	1
2014	2	1	2	1	2	1	3	2	0	1	0	1	1	1	1	2	2	3	3	1	1	1	2	1	1	25
2014	2	2	1	1	4	2	1	1	0	1	0	2	1	2	2	2	1	1	1	1	1	2	1	1	1	30
2014	2	1	2	1	2	1	3	2	0	1	0	1	2	1	1	2	2	2	2	2	2	2	4	1	1	5
2014	2	1	1	2	3	2	1	1	0	1	0	2	1	2	2	2	1	1	1	1	1	2	1	2	2	23
2014	2	1	2	1	4	2	1	1	0	1	0	1	2	1	2	2	2	1	1	2	2	1	3	2	2	34
2014	2	1	2	1	4	2	1	1	0	1	0	1	1	2	1	2	2	2	2	1	1	2	1	2	2	28
2014	2	1	2	3	2	1	0	1	2	1	1	1	2	2	2	2	2	5	0	2	2	2	4	1	1	24
2014	2	1	1	1	4	2	1	1	0	1	0	2	1	2	1	2	2	2	2	1	1	2	1	1	1	0
2014	1	1	1	2	2	1	0	1	0	1	0	1	2	1	2	2	2	1	1	1	1	1	2	2	2	20
2014	1	2	1	1	3	2	1	1	0	1	0	1	1	1	1	2	2	3	3	1	1	2	1	1	1	19
2014	2	1	2	1	1	1	0	1	0	1	0	2	1	1	1	1	2	4	4	1	1	3	5	1	1	1
2013	2	1	1	3	2	1	1	1	0	1	0	2	3	1	2	3	2	5	5	3	3	3	5	1	1	3
2014	2	1	1	1	4	2	1	1	0	1	0	2	1	2	2	2	1	1	1	1	1	2	1	1	1	19
2014	2	1	1	1	2	1	1	1	0	1	0	2	1	2	2	2	1	1	1	1	2	2	1	1	1	0
2013	2	1	2	1	2	1	1	1	0	1	0	1	1	2	1	2	2	2	2	1	2	2	1	1	1	13
2014	1	1	2	1	3	2	1	1	0	1	0	1	1	1	2	2	2	2	2	2	2	1	3	2	2	30
2014	2	1	1	1	3	2	0	1	0	1	0	2	1	1	1	2	2	3	3	1	2	3	5	1	1	1
2014	2	1	1	1	4	2	3	2	0	1	0	2	1	1	1	3	2	5	5	1	1	3	5	1	1	0
2014	2	1	1	1	2	1	0	1	0	1	0	2	1	2	2	2	1	1	1	1	1	2	1	1	1	0
2014	1	2	2	1	4	2	2	2	2	1	1	1	1	2	2	2	1	1	1	1	2	2	1	2	2	33
2014	2	1	1	3	4	2	0	1	0	1	0	1	2	1	2	2	2	1	1	1	2	3	5	1	1	0
2014	2	1	1	2	4	2	2	2	0	1	0	1	2	2	1	2	2	1	1	1	1	2	1	2	2	32
2014	2	3	1	2	4	2	0	1	0	1	0	2	1	2	2	2	1	1	1	1	1	2	1	2	2	30
2014	2	1	1	1	2	1	1	1	0	1	0	2	1	2	2	2	1	1	1	1	1	2	1	2	2	24
2014	2	2	1	2	4	2	2	2	0	1	0	1	1	2	2	2	1	1	1	1	1	2	1	2	2	27
2014	2	1	1	2	2	1	0	1	0	1	0	2	1	2	2	2	1	1	1	2	2	2	4	1	1	0
2014	1	1	2	1	3	2	2	2	0	1	0	1	2	2	1	2	2	1	1	3	3	3	5	1	1	12
2014	1	1	1	1	1	1	1	1	0	1	0	1	1	1	1	2	2	3	3	1	1	1	2	2	2	26
2014	2	1	2	1	4	2	0	1	0	1	0	1	1	2	1	2	2	2	2	1	1	2	1	1	1	0
2014	2	1	1	3	1	1	0	1	0	1	0	1	1	2	1	2	2	2	2	1	1	2	1	2	2	34
2014	2	1	2	3	2	1	0	1	0	1	0	1	1	1	2	1	2	3	3	2	2	1	3	1	1	12
2014	2	1	2	1	4	2	1	1	0	1	0	1	2	2	1	2	2	1	1	1	1	2	1	1	1	5
2014	2	1	1	3	2	1	1	1	0	1	0	2	1	2	2	2	1	1	1	1	3	2	5	2	1	6
2014	2	1	1	1	4	2	1	1	0	1	0	1	1	2	2	2	1	1	1	2	2	2	4	1	1	4
2014	2	1	1	1	2	1	1	1	0	1	0	2	1	2	2	2	1	1	1	1	1	2	1	2	2	32
2014	2	1	2	1	2	1	1	1	0	1	0	1	2	1	2	2	2	1	1	1	1	1	2	2	2	34
2014	2	1	2	3	4	2	1	1	2	1	1	1	1	2	1	2	2	2	2	2	2	2	4	2	2	33
2014	2	1	1	1	1	1	1	1	0	2	0	1	1	1	2	1	2	3	3	1	1	2	1	1	1	3
2014	1	1	2	3	3	2	1	1	0	1	0	1	1	2	2	2	1	1	1	1	1	2	1	2	2	26
2014	2	1	1	1	4	2	0	1	0	1	0	1	1	2	1	2	2	2	2	1	1	2	1	1	1	17
2014	1	1	2	1	2	1	1	1	2	1	1	1	2	1	2	2	2	1	1	1	1	1	2	2	2	27
2014	1	2	2	1	1	1	1	1	0	1	0	1	1	1	1	2	2	3	3	2	2	1	3	2	2	27
2014	2	2	1	1	4	2	1	1	0	1	0	1	1	2	2	2	1	1	1	1	1	1	2	2	2	27
2014	2	1	1	2	1	1	0	1	0	1	0	2	1	2	2	2	1	1	1	1	1	2	1	1	1	16
2014	2	1	1	1	4	2	0	1	0	1	0	2	1	2	2	1	2	2	2	1	1	2	1	2	1	1
2014	2	1	1	2	4	2	1	1	0	1	0	2	2	1	2	2	2	1	1	1	1	2	1	1	1	0
2014	1	1	2	1	1	1	1	1	0	1	0	1	1	2	2	2	1	1	1	1	1	2	1	2	2	13
2014	2	1	1	1	1	1	0	1	0	1	0	2	1	2	1	2	2	2	2	1	2	2	1	2	1	0
2014	1	1	1	1	2	1	2	2	0	1	0	2	1	2	2	2	1	1	1	1	1	2	1	2	2	25
2014	2	1	1	1	2	1	0	1	0	1	0	2	1	1	1	2	2	3	3	1	1	1	2	1	1	0
2014	2	1	1	1	4	2	1	1	0	1	0	2	2	1	2	2	2	1	1	1	1	2	1	1	1	26
2014	2	1	1	3	1	1	3	2	0	1	0	2	1	2	1	2	2	2	2	1	1	2	1	2	2	17
2014	1	1	3	3	2	1	1	1	2	2	1	1	2	2	2	2	2	5	0	1	1	2	1	2	2	27
2014	2	1	2	3	1	1	0	1	0	1	0	1	1	1	1	1	2	4	4	1	2	2	1	1	1	2
2014	2	1	1	3	2	1	0	1	0	1	0	2	1	2	2	2	1	1	1	1	2	2	1	1	1	6
2014	1	1	2	1	1	1	0	1	0	1	0	1	1	1	1	1	2	4	4	2	2	2	4	1	1	18
2014	2	1	2	1	4	2	2	2	0	1	0	2	2	2	2	2	2	5	0	2	2	2	4	1	1	0
2014	2	1	2	1	4	2	3	2	0	1	0	1	1	1	2	2	2	2	2	2	2	2	4	1	1	11
2014	1	1	1	2	1	1	0	1	0	1	0	1	1	2	2	1	2	2	2	2	2	1	3	2	2	26
2014	2	2	1	1	4	2	1	1	0	1	0	2	1	1	2	2	2	2	2	1	1	2	1	1	1	22
2014	2	1	1	1	3	2	0	1	0	1	0	1	1	2	1	2	2	2	2	1	1	2	1	2	2	33
2014	2	1	1	2	3	2	2	2	0	1	0	2	1	2	2	2	1	1	1	1	1	2	1	2	2	29
2014	2	1	2	1	2	1	1	1	0	1	0	1	2	2	1	2	2	1	1	1	1	1	2	1	1	30
2014	1	1	2	1	3	2	2	2	0	1	0	1	2	1	2	2	2	1	1	1	1	1	2	2	2	26
2014	2	1	1	2	2	1	0	1	0	1	0	2	1	2	2	2	1	1	1	1	2	2	1	2	2	26
2014	1	1	1	1	1	1	0	1	0	1	0	1	1	2	2	1	2	2	2	1	1	1	2	2	2	22
2014	2	1	1	3	2	1	3	2	0	1	0	2	1	2	2	2	1	1	1	1	2	2	1	1	1	29
2014	2	1	3	3	1	1	1	1	1	2	1	1	1	2	2	2	1	1	1	1	1	2	1	2	2	24
2014	2	1	1	3	4	2	1	1	0	1	0	1	2	2	1	2	2	1	1	2	2	2	4	1	1	7
2014	2	1	1	1	1	1	0	1	0	1	0	2	2	1	2	2	2	1	1	1	1	2	1	2	1	20
2014	2	1	2	1	4	2	0	1	2	1	1	1	2	2	1	2	2	1	1	2	2	1	3	2	2	17
2014	2	1	1	2	2	1	0	1	0	1	0	2	1	2	2	2	1	1	1	1	2	2	1	2	2	35
2014	2	1	2	1	2	1	1	1	0	1	0	1	2	2	1	2	2	1	1	1	1	1	2	1	1	9
2014	2	1	1	3	3	2	2	2	0	1	0	2	2	2	1	2	2	1	1	1	1	2	1	2	2	25
2014	2	1	1	3	1	1	1	1	0	1	0	2	2	2	2	2	2	5	0	1	2	2	1	1	1	15
2014	2	1	1	2	2	1	1	1	0	1	0	2	1	2	2	2	1	1	1	1	1	2	1	2	1	18
2014	2	1	3	1	2	1	1	1	2	1	1	1	1	2	2	2	1	1	1	1	1	2	1	2	2	24
2014	1	2	3	3	1	1	0	1	2	1	1	2	1	2	2	2	1	1	1	3	3	3	5	2	2	19
2014	2	1	2	3	4	2	1	1	0	1	0	1	2	2	1	1	2	2	2	2	2	2	4	1	1	1
2011	2	1	1	1	3	2	1	1	0	1	0	1	1	2	2	2	1	1	1	1	1	2	1	1	1	55
2012	2	2	3	2	1	1	0	1	2	1	1	1	1	2	2	2	1	1	1	1	1	2	1	1	1	36
2015	2	1	2	3	4	2	3	2	2	1	1	1	2	2	2	2	2	5	0	1	1	2	1	2	2	15
2015	2	1	2	1	3	2	1	1	0	1	0	2	1	2	2	2	1	1	1	1	1	2	1	2	2	22
2015	2	1	1	2	1	1	0	1	0	1	0	2	1	2	2	2	1	1	1	1	2	2	1	2	2	18
2015	2	1	1	3	1	1	1	1	0	1	0	1	1	1	2	2	2	2	2	1	2	2	1	2	2	14
2015	1	2	2	1	3	2	1	1	0	2	0	2	1	2	2	2	1	1	1	2	2	2	4	1	1	1
2015	1	2	2	1	2	1	2	2	0	1	0	1	1	1	2	2	2	2	2	1	1	1	2	2	2	15
2015	2	1	2	3	4	2	0	1	0	1	0	1	2	2	2	2	2	5	0	2	1	2	1	2	2	17
2015	2	4	2	1	1	1	0	1	0	1	0	2	2	2	1	2	2	1	1	1	1	2	1	2	2	19
2015	2	2	2	1	1	1	3	2	0	1	0	1	1	2	2	2	1	1	1	1	2	2	1	1	1	3
2015	2	1	1	2	1	1	0	1	0	1	0	1	1	2	2	2	1	1	1	1	2	2	1	2	2	15
2015	2	1	1	1	3	2	1	1	0	1	0	1	1	2	1	2	2	2	2	1	1	1	2	2	2	17
2015	2	1	2	1	1	1	1	1	2	1	1	1	2	2	1	2	2	1	1	2	2	1	3	2	2	23
2015	2	2	1	3	4	2	1	1	0	1	0	1	1	2	2	2	1	1	1	1	1	2	1	2	2	12
2015	2	1	2	3	2	1	0	1	0	1	0	1	2	2	1	1	2	2	2	1	2	2	1	1	1	1
2015	1	2	2	3	2	1	1	1	0	1	0	1	1	1	2	2	2	2	2	1	1	2	1	2	1	1
2015	2	1	2	1	3	2	1	1	0	1	0	1	2	2	1	2	2	1	1	2	1	1	2	2	2	17
2015	2	3	1	1	2	1	3	2	0	1	0	1	1	2	1	1	2	3	3	2	2	2	4	1	1	14
2015	2	1	2	1	3	2	1	1	0	1	0	1	1	2	1	2	2	2	2	1	2	2	1	1	1	13
2015	2	1	2	1	2	1	1	1	0	1	0	2	1	2	1	2	2	2	2	1	1	2	1	2	2	19
2015	2	1	2	2	4	2	1	1	0	1	0	1	1	2	2	2	1	1	1	1	2	2	1	1	1	10
2015	2	1	1	1	3	2	0	1	0	1	0	1	1	2	2	2	1	1	1	1	1	2	1	2	2	15
2015	2	1	2	1	4	2	1	1	0	1	0	1	2	2	1	2	2	1	1	1	1	2	1	2	1	16
2015	2	1	1	1	3	2	1	1	0	1	0	1	2	2	1	2	2	1	1	1	1	2	1	2	2	20
2015	2	1	2	3	2	1	0	1	0	1	0	1	1	2	2	2	1	1	1	2	2	1	3	2	2	2
2015	2	1	2	2	4	2	0	1	0	1	0	2	2	1	1	2	2	2	2	2	2	1	3	1	1	0
2015	2	1	2	1	2	1	1	1	0	1	0	1	2	1	2	2	2	1	1	2	2	1	3	1	1	1
2015	2	1	2	1	3	2	3	2	0	1	0	1	1	2	2	2	1	1	1	1	1	3	5	2	1	9
2015	1	1	1	1	1	1	0	1	0	1	0	1	2	2	1	2	2	1	1	2	2	1	3	2	2	13
2015	2	1	2	3	2	1	2	2	1	1	1	1	1	2	2	2	1	1	1	1	1	2	1	2	2	15
2015	2	1	2	3	1	1	0	1	0	1	0	2	1	2	2	2	1	1	1	1	3	3	5	1	1	6
2015	2	1	2	1	4	2	0	1	0	1	0	2	1	1	1	2	2	3	3	2	2	1	3	1	1	0
2015	1	1	1	2	4	2	1	1	0	2	0	2	1	2	2	2	1	1	1	1	1	2	1	2	2	16
2015	2	1	2	1	4	2	2	2	0	1	0	1	1	2	1	3	2	5	5	1	1	2	1	1	1	12
2015	2	1	1	1	4	2	3	2	0	1	0	1	1	2	1	2	2	2	2	1	1	3	5	2	2	8
2015	2	1	1	1	1	1	0	1	0	1	0	1	3	1	3	3	2	5	5	1	1	1	2	2	2	22
2015	1	1	2	3	4	2	0	1	0	1	0	1	1	2	2	2	1	1	1	1	1	1	2	2	2	17
2015	2	2	1	1	4	2	1	1	0	1	0	1	1	1	1	2	2	3	3	2	2	1	3	2	2	18
2015	2	1	2	1	1	1	0	1	0	1	0	1	1	1	2	1	2	3	3	2	2	2	4	1	1	0
2015	1	1	2	1	3	2	1	1	0	1	0	1	1	2	2	2	1	1	1	1	1	2	1	2	2	13
2015	2	1	1	1	4	2	0	1	0	1	0	2	1	2	1	2	2	2	2	1	1	2	1	1	1	0
2015	2	1	1	3	1	1	1	1	0	1	0	1	1	2	2	2	1	1	1	1	1	1	2	2	2	3
2015	2	1	2	1	4	2	3	2	0	1	0	1	2	2	1	1	2	2	2	2	2	2	4	2	2	18
2015	2	1	1	1	4	2	0	1	0	1	0	2	1	2	1	2	2	2	2	1	1	3	5	2	2	22
2015	2	1	2	3	4	2	2	2	0	1	0	2	2	2	2	2	2	5	0	1	2	2	1	2	2	21
2015	2	1	1	3	1	1	1	1	0	1	0	2	1	2	2	1	2	2	2	1	1	2	1	1	1	22
2015	2	1	1	2	4	2	3	2	0	1	0	1	1	1	2	2	2	2	2	1	1	2	1	2	2	16
2015	2	1	1	2	2	1	0	1	0	1	0	1	1	2	2	2	1	1	1	1	1	2	1	2	2	16
2015	2	1	1	1	1	1	0	1	0	1	0	2	2	2	1	2	2	1	1	1	1	2	1	2	2	20
2015	2	2	2	3	4	2	2	2	0	1	0	1	2	2	2	2	2	5	0	2	2	2	4	1	1	3
2015	2	1	1	1	4	2	0	1	0	1	0	2	1	2	2	2	1	1	1	1	2	2	1	2	2	21
2015	1	4	1	2	4	2	0	1	0	1	0	1	1	1	1	2	2	3	3	1	1	2	1	2	2	2
2015	2	1	2	1	2	1	0	1	0	1	0	1	2	2	1	2	2	1	1	2	2	2	4	1	1	10
2015	1	1	1	1	2	1	0	1	0	1	0	2	1	2	2	2	1	1	1	1	1	2	1	2	2	17
2015	2	1	1	2	1	1	1	1	0	1	0	1	1	2	2	2	1	1	1	1	2	2	1	1	1	3
2015	2	3	2	1	2	1	3	2	1	1	1	1	1	2	2	2	1	1	1	1	2	2	1	2	2	20
2015	2	1	2	1	2	1	1	1	0	1	0	1	1	2	1	2	2	2	2	1	2	2	1	2	2	17
2015	2	1	1	3	2	1	1	1	0	1	0	1	1	1	2	2	2	2	2	1	1	1	2	1	1	0
2015	2	1	2	1	4	2	1	1	0	1	0	2	1	1	1	2	2	3	3	1	1	2	1	2	2	22
2015	1	1	1	3	2	1	0	1	0	1	0	1	2	1	2	2	2	1	1	1	1	2	1	2	2	18
2015	2	1	2	1	2	1	1	1	0	1	0	2	1	2	2	2	1	1	1	1	2	2	1	1	1	9
2015	1	1	2	1	1	1	0	1	0	1	0	1	2	2	2	2	2	5	0	1	1	2	1	2	2	14
2015	1	1	1	1	4	2	0	1	0	1	0	1	1	2	2	1	2	2	2	1	1	3	5	2	2	12
2015	1	1	2	1	3	2	1	1	0	1	0	1	1	2	2	2	1	1	1	1	1	2	1	2	2	16
2015	2	1	1	2	3	2	1	1	0	1	0	1	1	2	2	2	1	1	1	1	1	1	2	2	2	14
2015	2	1	2	1	2	1	2	2	1	2	1	1	2	2	2	2	2	5	0	1	2	1	2	2	2	16
2015	1	1	1	1	4	2	3	2	0	1	0	2	1	1	2	2	2	2	2	2	2	2	4	1	1	5
2014	2	1	1	3	4	2	0	1	0	1	0	2	1	2	1	2	2	2	2	3	3	3	5	1	1	2
2015	2	1	1	3	1	1	0	1	0	2	0	1	1	2	2	2	1	1	1	1	1	2	1	2	2	18
2015	2	2	2	2	3	2	1	1	0	1	0	2	1	2	2	2	1	1	1	1	1	2	1	2	2	19
2015	2	1	1	1	4	2	1	1	0	1	0	1	1	2	2	2	1	1	1	2	2	1	3	2	2	9
2015	2	1	2	1	3	2	1	1	0	2	0	1	1	1	1	1	2	4	4	1	1	2	1	1	1	1
2015	2	1	1	3	4	2	1	1	0	1	0	1	1	2	1	2	2	2	2	1	1	2	1	2	2	16
2015	2	1	1	3	1	1	0	1	0	1	0	2	1	1	2	2	2	2	2	1	1	2	1	2	2	14
2015	1	1	2	1	2	1	1	1	0	1	0	2	1	2	2	2	1	1	1	1	1	2	1	1	1	17
2015	1	2	1	1	2	1	1	1	0	1	0	1	1	2	2	2	1	1	1	1	1	1	2	2	2	12
2015	1	1	1	1	2	1	2	2	0	1	0	1	1	2	1	2	2	2	2	1	2	1	2	2	2	13
2015	1	4	1	1	2	1	1	1	0	2	0	2	1	1	2	2	2	2	2	1	1	2	1	2	2	13
2015	1	1	3	1	2	1	2	2	1	2	1	1	2	1	2	2	2	1	1	1	1	2	1	2	2	20
2015	2	3	2	1	4	2	3	2	0	1	0	1	1	2	1	2	2	2	2	2	2	3	5	1	1	21
2015	2	1	1	1	3	2	1	1	0	1	0	2	1	2	1	2	2	2	2	1	1	2	1	2	2	13
2015	2	3	2	1	2	1	1	1	0	1	0	1	1	1	2	2	2	2	2	2	2	1	3	2	2	20
2015	2	1	1	2	1	1	0	1	0	1	0	1	1	2	2	2	1	1	1	1	1	2	1	2	2	17
2015	2	3	2	2	4	2	0	1	0	1	0	2	1	2	2	2	1	1	1	1	1	2	1	1	1	12
2015	2	1	1	1	4	2	0	1	0	1	0	2	2	2	2	2	2	5	0	1	1	2	1	2	1	1
2015	2	1	3	3	1	1	3	2	1	1	1	1	2	2	2	2	2	5	0	1	1	2	1	2	2	14
2015	2	1	1	2	3	2	1	1	0	1	0	2	1	2	2	2	1	1	1	1	1	2	1	2	2	14
2015	2	1	2	1	2	1	1	1	2	1	1	2	1	1	1	3	2	5	5	2	2	2	4	1	1	13
2015	2	2	2	3	4	2	3	2	0	1	0	1	1	2	1	2	2	2	2	2	2	2	4	1	1	6
2015	2	1	2	1	2	1	3	2	0	1	0	1	2	2	2	2	2	5	0	1	2	2	1	1	1	5
2015	1	1	2	1	2	1	1	1	0	1	0	2	2	2	2	1	2	1	1	2	2	2	4	1	1	0
2015	1	1	1	1	3	2	1	1	0	1	0	1	1	1	2	2	2	2	2	1	2	1	2	2	2	16
2015	2	1	2	1	3	2	2	2	0	1	0	1	1	2	2	2	1	1	1	1	1	2	1	2	2	18
2015	2	1	2	1	2	1	0	1	0	1	0	1	2	2	1	2	2	1	1	2	2	2	4	1	1	12
2015	2	1	1	1	4	2	1	1	0	1	0	1	2	2	2	2	2	5	0	1	1	2	1	2	2	21
2015	2	1	1	1	2	1	0	1	0	1	0	1	1	2	2	2	1	1	1	1	1	2	1	2	2	7
2015	2	4	2	1	4	2	3	2	0	1	0	1	2	2	2	2	2	5	0	2	2	2	4	1	1	12
2015	2	1	1	3	1	1	0	1	0	1	0	2	1	1	1	1	2	4	4	3	3	3	5	1	1	4
2015	2	1	1	3	1	1	0	1	0	1	0	2	1	1	2	2	2	2	2	3	3	3	5	1	1	0
2015	1	1	1	3	4	2	1	1	0	1	0	2	1	1	1	2	2	3	3	3	3	3	5	1	1	0
2015	2	1	2	1	4	2	3	2	0	1	0	1	1	2	2	2	1	1	1	2	2	2	4	2	2	16
2015	2	1	1	3	4	2	0	1	0	1	0	2	1	2	2	2	1	1	1	3	3	3	5	2	1	1
2015	2	1	1	3	3	2	1	1	0	1	0	2	3	2	1	3	2	5	5	3	3	3	5	1	1	8
2013	2	1	1	1	1	1	0	1	0	1	0	2	1	2	2	2	1	1	1	3	3	3	5	1	1	46
2010	2	1	2	1	4	2	0	1	0	1	0	1	2	2	1	2	2	1	1	1	2	2	1	1	1	55
2012	2	1	1	2	1	1	0	1	0	1	0	1	2	1	1	2	2	2	2	1	1	2	1	1	1	8
2010	1	2	2	1	4	2	3	2	2	1	1	1	2	2	2	2	2	5	0	2	2	1	3	2	2	74
2011	2	1	2	1	4	2	1	1	2	1	1	2	2	2	2	2	2	5	0	1	1	2	1	1	1	26
2012	1	1	2	1	2	1	1	1	2	2	1	1	1	2	2	2	1	1	1	1	1	1	2	1	1	43
2011	2	1	2	1	2	1	1	1	0	2	0	1	1	1	1	2	2	3	3	2	1	2	1	1	1	6
2010	2	1	1	1	2	1	0	1	0	1	0	2	1	2	1	2	2	2	2	1	2	2	1	1	1	0
2010	2	1	2	1	2	1	0	1	1	1	1	1	1	1	2	2	2	2	2	1	1	1	2	1	1	24
2010	2	1	2	1	1	1	1	1	0	1	0	1	2	1	2	2	2	1	1	1	1	2	1	1	1	11
2010	2	2	3	1	2	1	1	1	1	1	1	1	1	2	2	2	1	1	1	1	1	2	1	2	2	82
2010	2	1	1	3	1	1	0	1	0	2	0	1	2	1	2	1	2	2	2	1	1	2	1	1	1	27
2010	2	1	3	1	4	2	0	1	1	1	1	1	1	1	1	2	2	3	3	1	1	1	2	2	2	80
2010	2	2	2	3	4	2	1	1	2	1	1	1	2	2	1	2	2	1	1	2	2	2	4	1	1	5
2010	2	2	2	1	4	2	3	2	2	1	1	1	1	2	2	2	1	1	1	2	2	1	3	1	1	9
2010	2	2	1	1	2	1	0	1	0	1	0	2	1	2	2	1	2	2	2	1	2	1	2	1	1	19
2010	1	1	2	1	4	2	0	1	0	1	0	2	2	1	2	2	2	1	1	2	2	2	4	2	1	0
2010	2	2	1	1	1	1	1	1	0	1	0	1	1	2	1	2	2	2	2	1	1	2	1	1	1	40
2010	2	1	3	1	2	1	1	1	2	1	1	2	1	2	2	2	1	1	1	1	1	2	1	2	2	78
2010	2	2	1	3	2	1	1	1	0	1	0	2	1	1	1	2	2	3	3	1	1	2	1	1	1	31
2010	2	1	2	1	4	2	1	1	1	2	1	1	1	1	1	2	2	3	3	2	2	2	4	1	1	7
2010	1	1	1	1	4	2	1	1	0	1	0	1	1	2	2	2	1	1	1	1	1	1	2	1	1	69
2010	2	1	3	1	3	2	3	2	2	1	1	1	1	2	1	2	2	2	2	1	1	3	5	1	1	54
2010	2	2	2	1	4	2	1	1	0	1	0	2	1	2	2	1	2	2	2	1	1	2	1	2	1	21
2010	2	2	2	1	3	2	0	1	0	2	0	1	2	2	1	1	2	2	2	2	2	2	4	1	1	9
2010	2	2	2	1	4	2	3	2	0	1	0	2	1	1	1	2	2	3	3	3	3	3	5	1	1	1
2010	2	2	2	1	2	1	1	1	0	2	0	1	2	1	2	2	2	1	1	1	1	1	2	1	1	26
2010	2	1	2	1	4	2	3	2	0	1	0	2	2	2	2	2	2	5	0	1	1	2	1	1	1	1
2010	2	1	1	3	1	1	0	1	0	1	0	1	1	2	2	2	1	1	1	3	3	3	5	1	1	34
2010	1	2	2	1	3	2	2	2	2	1	1	1	1	2	1	2	2	2	2	2	2	2	4	1	1	10
2010	2	2	1	3	4	2	1	1	0	2	0	2	1	2	2	2	1	1	1	1	2	2	1	1	1	5
2010	2	1	2	1	4	2	0	1	0	1	0	1	2	2	1	2	2	1	1	2	2	2	4	1	1	5
2010	2	1	2	1	2	1	0	1	2	1	1	1	2	1	2	2	2	1	1	2	2	2	4	2	2	80
2010	2	1	3	1	2	1	1	1	1	1	1	1	1	2	2	2	1	1	1	1	2	2	1	2	2	80
2010	2	1	2	1	1	1	0	1	1	1	1	1	2	2	2	2	2	5	0	2	2	2	4	1	1	58
2010	2	2	2	1	1	1	1	1	1	2	1	1	2	2	2	2	2	5	0	2	2	2	4	2	2	78
2010	2	1	2	1	3	2	1	1	0	2	0	2	1	2	2	2	1	1	1	1	1	3	5	1	1	1
2010	2	2	1	1	3	2	1	1	0	1	0	2	2	2	1	2	2	1	1	1	1	2	1	1	1	60
2010	2	1	2	2	2	1	0	1	1	2	1	2	1	2	2	2	1	1	1	1	1	1	2	1	1	24
2010	2	2	2	1	3	2	0	1	1	2	1	1	1	2	2	2	1	1	1	1	1	2	1	1	1	33
2010	2	2	2	3	2	1	0	1	0	1	0	2	2	2	2	2	2	5	0	1	1	2	1	2	1	10
2010	2	2	2	1	2	1	1	1	0	1	0	1	2	1	2	2	2	1	1	1	2	1	2	1	1	34
2010	2	1	1	2	1	1	0	1	0	1	0	2	1	2	2	2	1	1	1	1	1	2	1	1	1	5
2010	2	2	2	3	4	2	0	1	2	1	1	1	2	2	1	2	2	1	1	2	2	2	4	1	1	17
2010	2	1	2	1	2	1	0	1	0	1	0	1	2	2	1	2	2	1	1	2	2	2	4	1	1	9
2010	2	1	2	1	1	1	3	2	2	2	1	1	1	2	1	2	2	2	2	2	2	1	3	1	1	21
2010	2	1	2	1	4	2	3	2	2	2	1	1	1	1	2	2	2	2	2	1	2	2	1	1	1	24
2010	2	3	2	3	2	1	1	1	2	2	1	2	1	2	2	2	1	1	1	1	1	2	1	2	2	76
2010	1	1	1	1	2	1	1	1	0	2	0	2	1	2	2	2	1	1	1	1	1	2	1	2	1	18
2010	1	2	2	1	4	2	3	2	0	2	0	1	2	1	2	1	2	2	2	2	2	1	3	1	1	6
2010	2	1	1	3	3	2	2	2	0	1	0	1	1	2	1	2	2	2	2	1	1	2	1	2	2	81
2010	2	1	2	1	4	2	3	2	2	2	1	1	2	1	1	2	2	2	2	2	2	2	4	1	1	14
2010	2	1	2	1	4	2	3	2	0	1	0	1	2	2	1	2	2	1	1	2	2	2	4	1	1	5
2010	2	1	1	3	1	1	1	1	0	2	0	1	1	2	2	2	1	1	1	2	2	2	4	1	1	22
2010	2	1	1	3	4	2	3	2	0	1	0	2	2	2	2	2	2	5	0	2	2	2	4	1	1	1
2010	2	1	3	1	1	1	0	1	2	1	1	2	1	2	2	2	1	1	1	3	3	3	5	2	2	78
2010	2	2	1	1	2	1	0	1	0	1	0	2	2	2	1	1	2	2	2	2	2	2	4	1	1	19
2010	2	1	1	1	1	1	0	1	0	1	0	2	1	1	2	2	2	2	2	3	3	3	5	1	1	0
2010	2	2	1	1	4	2	1	1	0	2	0	2	2	2	1	2	2	1	1	1	1	2	1	1	1	57
2010	2	2	1	3	1	1	2	2	0	2	0	2	1	2	1	2	2	2	2	1	1	2	1	1	1	14
2010	1	2	1	1	2	1	1	1	0	2	0	1	1	2	1	1	2	3	3	1	1	2	1	1	1	7
2010	1	1	2	1	2	1	1	1	0	1	0	2	1	2	2	2	1	1	1	1	1	2	1	1	1	18
2010	2	2	2	1	4	2	3	2	0	1	0	1	2	2	2	2	2	5	0	1	1	3	5	1	1	2
2010	2	1	1	1	2	1	0	1	0	1	0	1	1	1	2	2	2	2	2	2	2	2	4	1	1	10
2010	2	1	1	2	1	1	0	1	0	1	0	2	1	2	2	2	1	1	1	1	1	3	5	1	1	10
2010	2	1	2	1	4	2	2	2	2	2	1	1	2	2	1	2	2	1	1	2	2	1	3	1	1	20
2010	2	1	1	2	4	2	0	1	0	1	0	2	1	2	2	2	1	1	1	1	1	2	1	1	1	42
2010	2	2	3	1	3	2	1	1	1	2	1	1	2	2	2	1	2	1	1	2	2	2	4	1	1	20
2010	2	1	2	1	2	1	1	1	2	1	1	1	2	2	2	2	2	5	0	2	2	1	3	2	1	46
2010	1	2	3	1	2	1	1	1	2	1	1	1	1	2	1	2	2	2	2	1	1	2	1	1	1	48
2010	2	1	3	3	4	2	2	2	2	1	1	2	2	2	1	2	2	1	1	1	2	3	5	2	1	1
2010	1	2	1	1	2	1	1	1	0	2	0	1	1	2	2	2	1	1	1	1	1	2	1	1	1	38
2010	1	1	1	1	1	1	0	1	0	1	0	2	1	2	2	2	1	1	1	1	1	1	2	1	1	56
2010	2	1	1	3	2	1	1	1	0	1	0	1	2	2	1	2	2	1	1	1	1	1	2	2	2	77
2010	2	1	1	3	1	1	0	1	0	1	0	2	1	3	1	2	2	5	5	1	1	2	1	1	1	6
2010	2	3	1	1	1	1	1	1	0	1	0	2	2	2	1	2	2	1	1	2	2	2	4	1	1	0
2010	2	1	2	1	4	2	1	1	2	1	1	2	2	2	1	2	2	1	1	2	2	2	4	1	1	5
2010	2	1	1	3	1	1	0	1	0	1	0	1	1	2	2	2	1	1	1	1	3	1	5	1	1	0
2010	2	1	1	1	4	2	1	1	0	1	0	2	1	2	2	2	1	1	1	1	1	2	1	2	2	39
2010	2	1	2	1	2	1	1	1	0	1	0	2	2	2	1	2	2	1	1	1	1	1	2	2	2	1
2010	1	1	1	1	4	2	1	1	0	1	0	1	1	1	1	1	2	4	4	2	2	1	3	1	1	11
2010	1	2	2	1	2	1	2	2	2	2	1	1	1	2	2	2	1	1	1	2	2	2	4	1	1	5
2010	2	1	1	3	1	1	1	1	0	1	0	2	1	2	2	2	1	1	1	3	3	3	5	1	1	6
2010	2	2	1	1	2	1	0	1	1	2	1	2	1	2	2	2	1	1	1	1	1	2	1	1	1	2
2010	2	1	2	1	3	2	0	1	1	2	1	1	1	2	2	2	1	1	1	2	2	1	3	2	2	75
2010	1	1	2	1	2	1	1	1	2	2	1	1	2	1	2	2	2	1	1	2	2	1	3	1	1	66
2010	1	2	2	3	4	2	3	2	0	1	0	1	1	2	2	2	1	1	1	2	2	1	3	1	1	20
2010	2	2	1	1	2	1	0	1	0	1	0	2	1	1	2	2	2	2	2	3	3	2	5	1	1	0
2010	2	1	2	1	4	2	2	2	0	1	0	1	1	2	1	2	2	2	2	1	1	1	2	1	1	44
2010	2	1	1	3	4	2	1	1	0	1	0	2	1	1	1	1	2	4	4	3	3	3	5	1	1	0
2011	1	2	2	1	2	1	0	1	2	2	1	1	2	1	2	2	2	1	1	1	1	2	1	1	1	16
2010	2	1	1	1	1	1	0	1	1	2	1	1	1	2	1	2	2	2	2	1	1	2	1	2	2	74
2011	2	2	2	1	4	2	2	2	0	1	0	1	1	1	2	2	2	2	2	1	2	2	1	1	1	2
2010	2	2	1	3	1	1	0	1	0	1	0	2	1	2	2	2	1	1	1	3	3	3	5	1	1	0
2011	2	1	1	1	2	1	0	1	0	1	0	2	1	2	2	2	1	1	1	1	1	2	1	1	1	8
2010	2	1	1	1	2	1	1	1	0	1	0	1	1	2	2	2	1	1	1	1	1	2	1	1	1	45
2011	2	1	2	1	4	2	0	1	2	1	1	1	2	1	1	2	2	2	2	2	2	2	4	1	1	18
2010	1	1	2	1	4	2	2	2	2	2	1	1	2	2	2	2	2	5	0	2	2	3	5	1	1	30
2011	2	1	2	1	4	2	2	2	0	1	0	1	1	2	3	2	2	5	5	1	1	1	2	1	1	15
2010	1	1	1	1	4	2	1	1	0	1	0	1	1	2	2	2	1	1	1	1	1	2	1	1	1	34
2010	2	2	1	3	3	2	1	1	0	2	0	1	1	2	1	1	2	3	3	2	2	2	4	1	1	2
2011	1	3	1	1	2	1	0	1	0	1	0	2	1	2	2	2	1	1	1	1	1	2	1	1	1	20
2010	2	1	1	1	4	2	3	2	0	1	0	2	1	2	1	2	2	2	2	3	3	3	5	1	1	11
2010	2	1	1	1	4	2	2	2	0	1	0	2	1	2	2	2	1	1	1	1	1	2	1	1	1	34
2010	2	2	2	1	4	2	1	1	0	1	0	1	2	1	1	2	2	2	2	1	1	2	1	1	1	2
2010	1	1	3	2	3	2	2	2	2	1	1	1	1	2	2	2	1	1	1	1	1	3	5	2	2	80
2010	2	2	1	1	2	1	2	2	0	1	0	2	2	1	1	2	2	2	2	1	1	1	2	1	1	0
2010	2	1	1	3	1	1	0	1	0	1	0	1	1	2	1	2	2	2	2	2	2	2	4	1	1	7
2010	2	1	1	1	3	2	0	1	0	1	0	1	2	1	2	2	2	1	1	1	2	2	1	1	1	33
2010	2	1	3	1	4	2	2	2	2	2	1	1	2	1	1	2	2	2	2	1	1	2	1	1	1	24
2010	2	1	2	3	4	2	1	1	0	1	0	2	1	2	1	1	2	3	3	2	2	1	3	1	1	1
2011	1	1	2	1	2	1	3	2	2	2	1	1	2	2	2	2	2	5	0	2	2	2	4	1	1	36
2010	2	1	1	1	2	1	2	2	2	2	1	1	1	2	2	2	1	1	1	1	1	2	1	1	1	23
2010	1	2	1	1	2	1	1	1	1	2	1	1	1	2	2	2	1	1	1	1	1	2	1	2	2	74
2010	1	1	2	2	3	2	2	2	2	2	1	1	1	2	2	2	1	1	1	1	1	2	1	2	2	74
2010	2	1	1	1	1	1	0	1	0	1	0	2	2	2	1	2	2	1	1	1	1	3	5	2	2	73
2010	2	2	2	3	1	1	3	2	0	1	0	1	2	2	2	2	2	5	0	2	2	2	4	1	1	6
2011	2	2	2	1	2	1	1	1	1	2	1	1	1	2	2	2	1	1	1	1	1	1	2	2	2	71
2010	2	2	2	3	3	2	3	2	2	2	1	2	1	2	2	2	1	1	1	1	2	1	2	1	1	10
2011	1	2	2	1	4	2	2	2	2	2	1	1	2	2	3	1	2	5	5	1	1	2	1	1	1	15
2011	2	2	2	1	4	2	0	1	0	1	0	2	2	1	2	2	2	1	1	1	2	2	1	1	1	6
2010	2	1	1	1	3	2	0	1	0	1	0	1	1	2	1	2	2	2	2	3	3	3	5	1	1	5
2010	1	1	2	1	4	2	1	1	0	1	0	1	1	2	1	2	2	2	2	1	2	3	5	1	1	53
2010	2	1	1	1	3	2	2	2	2	2	1	1	1	2	2	2	1	1	1	1	1	2	1	1	1	50
2010	2	1	2	1	2	1	0	1	2	1	1	1	2	2	2	2	2	5	0	1	1	1	2	2	2	74
2011	2	2	2	1	3	2	3	2	2	1	1	1	2	2	1	2	2	1	1	1	2	1	2	1	1	21
2011	1	1	2	2	3	2	1	1	2	2	1	1	1	2	2	2	1	1	1	1	1	2	1	2	2	69
2010	2	2	2	1	2	1	0	1	0	1	0	1	1	1	2	2	2	2	2	2	1	2	1	1	1	3
2011	1	1	2	1	4	2	1	1	2	2	1	1	1	2	2	2	1	1	1	1	1	1	2	2	2	69
2010	2	2	2	1	4	2	1	1	0	1	0	1	1	2	1	2	2	2	2	2	2	2	4	1	1	4
2010	2	1	1	1	1	1	0	1	0	2	0	1	1	2	1	3	2	5	5	1	1	2	1	1	1	19
2010	2	1	1	1	2	1	1	1	0	2	0	2	1	2	2	2	1	1	1	1	1	1	2	2	2	75
2010	1	1	1	1	4	2	2	2	0	1	0	2	1	1	2	2	2	2	2	1	2	2	1	1	1	1
2011	1	2	2	1	4	2	0	1	1	2	1	1	1	2	2	2	1	1	1	2	2	2	4	2	2	67
2011	2	2	2	1	4	2	3	2	0	1	0	1	2	2	1	2	2	1	1	2	2	2	4	1	1	17
2010	1	2	2	1	4	2	1	1	0	1	0	2	1	2	2	2	1	1	1	1	1	2	1	1	1	7
2010	2	1	1	1	4	2	1	1	2	1	1	1	2	2	2	2	2	5	0	1	1	2	1	2	1	54
2010	2	1	1	1	3	2	0	1	0	1	0	1	1	2	2	2	1	1	1	1	1	2	1	2	1	28
2011	2	2	2	1	1	1	0	1	0	1	0	1	1	2	2	2	1	1	1	2	2	2	4	2	1	2
2011	2	1	1	3	1	1	0	1	0	1	0	1	2	2	2	2	2	5	0	1	2	2	1	1	1	5
2010	2	2	1	3	1	1	0	1	0	1	0	2	3	1	3	3	2	5	5	3	3	3	5	1	1	0
2010	2	1	1	1	3	2	1	1	0	1	0	2	1	2	2	2	1	1	1	1	1	2	1	2	2	72
2010	1	3	2	1	3	2	1	1	0	1	0	1	2	1	2	2	2	1	1	1	1	2	1	2	2	74
2010	2	2	2	1	2	1	0	1	2	2	1	2	1	2	2	2	1	1	1	2	2	2	4	2	1	4
2010	2	1	1	2	2	1	3	2	2	1	1	2	1	2	2	2	1	1	1	1	1	2	1	2	2	73
2011	2	2	2	1	4	2	3	2	2	1	1	1	2	2	2	2	2	5	0	2	1	2	1	2	2	66
2011	2	1	1	1	1	1	0	1	2	1	1	1	2	1	2	2	2	1	1	2	2	2	4	1	1	27
2010	2	1	1	1	2	1	3	2	1	1	1	1	2	2	1	2	2	1	1	1	1	1	2	2	2	75
2011	2	1	1	3	1	1	0	1	0	1	0	2	1	2	2	2	1	1	1	1	1	2	1	1	1	0
2010	2	1	2	1	3	2	0	1	0	1	0	1	2	2	1	2	2	1	1	2	2	2	4	1	1	15
2011	2	1	1	1	4	2	3	2	1	1	1	2	2	2	2	2	2	5	0	1	2	1	2	1	1	8
2010	1	2	2	1	4	2	2	2	0	1	0	1	2	1	1	2	2	2	2	2	2	1	3	1	1	48
2011	1	1	2	1	2	1	1	1	0	1	0	1	1	1	1	2	2	3	3	2	2	2	4	1	1	27
2011	2	1	1	1	2	1	0	1	0	2	0	2	1	2	2	2	1	1	1	1	2	2	1	2	2	70
2011	2	1	2	1	2	1	2	2	1	1	1	1	2	2	1	2	2	1	1	2	2	1	3	1	1	70
2010	2	1	2	1	4	2	0	1	0	1	0	1	2	2	2	2	2	5	0	2	1	2	1	1	1	4
2010	2	1	1	1	1	1	0	1	0	1	0	1	1	2	2	2	1	1	1	1	1	2	1	1	1	4
2011	2	1	3	1	4	2	1	1	2	2	1	1	2	2	1	2	2	1	1	1	1	2	1	2	2	69
2011	2	1	2	1	2	1	1	1	0	1	0	2	1	2	2	2	1	1	1	1	1	2	1	1	1	16
2011	1	1	1	3	1	1	0	1	0	1	0	2	1	2	2	2	1	1	1	3	3	3	5	2	2	68
2011	1	1	1	1	1	1	0	1	0	1	0	1	1	2	2	2	1	1	1	1	1	2	1	2	2	68
2011	1	1	1	1	4	2	1	1	1	1	1	2	2	2	2	2	2	5	0	1	1	2	1	1	1	22
2010	1	1	1	1	4	2	1	1	0	1	0	1	1	1	2	2	2	2	2	1	2	2	1	1	1	23
2010	1	1	1	3	1	1	0	1	0	1	0	2	1	2	2	2	1	1	1	3	3	3	5	1	1	1
2011	2	1	2	1	3	2	1	1	0	1	0	1	2	1	2	2	2	1	1	2	2	1	3	1	1	2
2011	2	2	2	1	3	2	2	2	2	1	1	2	2	2	2	2	2	5	0	1	1	2	1	1	1	15
2011	1	1	1	1	4	2	1	1	0	1	0	1	1	2	2	2	1	1	1	1	1	2	1	1	1	41
2011	2	1	1	1	4	2	2	2	0	1	0	2	1	1	1	2	2	3	3	3	3	3	5	1	1	0
2010	2	2	1	2	4	2	1	1	0	1	0	2	2	1	2	2	2	1	1	1	2	2	1	1	1	1
2010	2	1	1	1	4	2	1	1	0	1	0	2	1	1	2	2	2	2	2	1	1	2	1	1	1	52
2010	2	1	1	1	4	2	0	1	0	1	0	2	1	2	2	2	1	1	1	1	1	2	1	1	1	1
2010	2	1	3	1	1	1	0	1	1	1	1	2	1	1	1	2	2	3	3	1	1	2	1	1	1	2
2010	2	1	1	1	4	2	1	1	0	1	0	2	1	1	2	2	2	2	2	1	1	2	1	1	1	25
2011	2	1	1	1	2	1	2	2	1	2	1	1	1	2	2	2	1	1	1	1	2	2	1	2	2	70
2011	2	1	2	1	2	1	3	2	1	1	1	1	1	1	1	2	2	3	3	1	1	1	2	2	2	69
2011	2	2	2	1	1	1	1	1	0	1	0	2	1	2	3	2	2	5	5	1	1	3	5	2	1	21
2011	1	1	3	2	3	2	2	2	2	1	1	1	1	2	2	2	1	1	1	1	1	2	1	1	1	69
2011	1	1	1	1	2	1	1	1	0	1	0	1	1	2	2	2	1	1	1	1	1	2	1	2	2	69
2011	2	1	1	2	3	2	2	2	0	1	0	2	1	2	2	2	1	1	1	1	2	2	1	1	1	15
2011	1	2	1	3	2	1	1	1	0	1	0	1	2	2	2	2	2	5	0	1	2	2	1	1	1	6
2011	2	1	1	3	4	2	0	1	0	2	0	2	1	2	2	2	1	1	1	1	1	2	1	1	1	44
2010	2	1	1	3	2	1	0	1	0	2	0	1	1	1	1	2	2	3	3	1	2	1	2	2	1	17
2010	2	1	1	2	3	2	0	1	0	1	0	2	1	2	2	2	1	1	1	1	1	2	1	2	2	19
2011	2	1	1	1	4	2	0	1	0	1	0	1	2	2	1	2	2	1	1	1	1	2	1	2	2	63
2011	2	1	2	1	4	2	0	1	0	1	0	1	2	1	2	2	2	1	1	3	3	3	5	1	1	16
2011	2	1	2	1	2	1	0	1	0	1	0	2	1	2	2	2	1	1	1	1	1	2	1	1	1	52
2011	2	2	2	1	4	2	3	2	2	2	1	1	2	2	2	2	2	5	0	2	2	1	3	1	1	50
2011	2	2	1	1	4	2	0	1	0	1	0	1	2	1	2	2	2	1	1	1	1	2	1	1	1	11
2011	2	1	2	1	2	1	3	2	0	1	0	2	2	2	2	2	2	5	0	2	2	2	4	2	1	2
2011	2	1	2	1	1	1	2	2	0	1	0	1	1	2	2	2	1	1	1	2	2	2	4	1	1	15
2011	2	1	2	3	4	2	3	2	0	1	0	2	2	2	2	1	2	1	1	2	2	2	4	1	1	0
2011	1	1	2	1	1	1	2	2	1	1	1	1	2	2	2	2	2	5	0	2	2	2	4	1	1	48
2011	2	2	1	1	4	2	2	2	0	1	0	2	1	2	2	2	1	1	1	1	1	2	1	1	1	49
2011	2	2	1	2	4	2	2	2	0	1	0	2	1	2	2	2	1	1	1	1	1	2	1	1	1	10
2011	1	2	2	1	3	2	1	1	0	1	0	1	2	1	2	2	2	1	1	1	1	1	2	2	2	67
2011	2	2	2	1	4	2	1	1	0	1	0	1	2	1	2	2	2	1	1	2	2	2	4	1	1	15
2011	2	2	2	1	2	1	1	1	0	1	0	1	1	1	2	2	2	2	2	2	2	3	5	1	1	9
2011	2	2	1	1	2	1	1	1	0	2	0	2	1	1	1	1	2	4	4	2	2	1	3	1	1	0
2011	2	1	1	1	4	2	1	1	2	2	1	2	1	2	1	2	2	2	2	1	1	2	1	2	2	66
2011	2	1	2	2	3	2	3	2	2	1	1	1	1	2	2	2	1	1	1	1	1	2	1	1	1	36
2011	2	2	1	3	4	2	1	1	0	1	0	1	1	2	2	2	1	1	1	2	2	2	4	1	1	13
2011	1	1	2	1	1	1	0	1	0	1	0	1	2	2	2	2	2	5	0	1	1	2	1	1	1	25
2011	2	2	1	1	3	2	1	1	0	2	0	2	1	2	1	2	2	2	2	1	1	3	5	1	1	15
2011	2	1	1	2	4	2	0	1	0	1	0	1	1	2	2	2	1	1	1	1	2	2	1	1	1	31
2011	2	2	1	2	2	1	1	1	0	1	0	1	1	1	2	2	2	2	2	1	1	2	1	2	2	68
2011	1	2	2	1	4	2	2	2	2	2	1	1	1	1	2	2	2	2	2	2	2	2	4	1	1	15
2011	1	2	1	1	2	1	0	1	2	1	1	1	2	2	1	2	2	1	1	1	1	3	5	2	2	61
2011	2	2	1	1	2	1	1	1	2	2	1	1	1	2	2	2	1	1	1	1	2	1	2	2	1	17
2011	1	1	1	1	2	1	1	1	0	1	0	1	1	2	2	2	1	1	1	1	2	1	2	2	2	67
2011	2	2	2	1	4	2	0	1	0	1	0	2	1	1	1	2	2	3	3	2	1	3	5	1	1	1
2011	2	1	2	1	1	1	3	2	2	2	1	1	1	2	2	1	2	2	2	1	1	1	2	1	1	51
2011	2	1	3	1	2	1	1	1	2	1	1	1	2	1	2	2	2	1	1	2	2	1	3	2	2	67
2011	2	1	1	3	2	1	1	1	0	2	0	2	1	2	2	2	1	1	1	1	1	2	1	1	1	0
2011	2	1	1	1	4	2	3	2	0	1	0	1	1	2	1	2	2	2	2	1	1	2	1	2	2	64
2011	2	1	1	1	2	1	1	1	1	2	1	2	1	2	1	2	2	2	2	1	2	2	1	1	1	53
2011	2	1	1	2	2	1	0	1	1	2	1	1	1	2	2	2	1	1	1	1	1	1	2	1	1	70
2011	2	2	2	1	4	2	1	1	0	1	0	1	2	1	1	2	2	2	2	2	2	2	4	1	1	8
2011	1	1	1	1	2	1	3	2	2	1	1	1	1	2	2	2	1	1	1	1	1	2	1	2	2	62
2012	2	2	2	1	2	1	1	1	0	2	0	2	1	2	2	2	1	1	1	1	1	3	5	1	1	48
2011	2	1	2	1	3	2	1	1	0	1	0	1	1	1	1	2	2	3	3	1	1	1	2	1	1	6
2011	2	1	2	1	4	2	2	2	0	1	0	1	2	2	1	2	2	1	1	2	2	1	3	1	1	1
2011	2	1	2	1	4	2	1	1	0	1	0	1	1	2	1	2	2	2	2	1	1	2	1	1	1	21
2011	2	1	1	1	2	1	0	1	0	1	0	2	1	2	2	2	1	1	1	1	1	2	1	2	1	7
2011	2	2	1	1	4	2	3	2	0	1	0	2	2	2	1	2	2	1	1	1	1	3	5	1	1	3
2011	2	1	2	1	4	2	2	2	0	1	0	2	1	1	2	2	2	2	2	2	2	1	3	1	1	0
2011	2	2	2	1	1	1	0	1	0	1	0	2	2	1	1	1	2	3	3	3	3	3	5	1	1	3
2011	1	1	2	1	2	1	3	2	2	2	1	1	2	2	2	2	2	5	0	2	2	2	4	2	2	68
2011	2	1	1	1	2	1	1	1	0	2	0	2	1	1	1	2	2	3	3	2	2	2	4	1	1	2
2011	2	1	1	3	1	1	0	1	0	1	0	2	1	2	2	2	1	1	1	1	2	3	5	1	1	13
2012	2	1	1	1	2	1	1	1	1	2	1	2	1	2	2	2	1	1	1	1	1	2	1	2	2	58
2011	2	1	1	1	4	2	3	2	0	1	0	1	1	1	1	2	2	3	3	1	1	2	1	2	2	67
2011	1	1	1	1	1	1	0	1	0	1	0	2	3	1	3	3	2	5	5	1	1	1	2	1	1	12
2011	2	2	1	1	1	1	3	2	0	1	0	2	2	2	2	2	2	5	0	1	1	2	1	2	2	60
2011	2	1	1	1	2	1	2	2	1	2	1	1	1	2	1	2	2	2	2	1	1	3	5	1	1	32
2011	2	1	3	1	2	1	1	1	1	1	1	1	2	2	1	2	2	1	1	1	2	2	1	2	2	64
2011	2	2	2	1	2	1	1	1	0	1	0	2	1	2	1	2	2	2	2	1	2	2	1	1	1	22
2011	2	1	1	1	4	2	1	1	0	1	0	2	1	3	3	2	2	5	5	1	1	2	1	1	1	29
2011	2	1	1	1	4	2	3	2	0	1	0	1	1	2	2	2	1	1	1	1	1	2	1	2	2	61
2012	2	2	1	1	2	1	1	1	0	1	0	1	1	1	2	2	2	2	2	1	1	2	1	1	1	24
2011	2	1	2	1	4	2	1	1	0	1	0	1	1	1	1	2	2	3	3	1	2	1	2	1	1	28
2011	2	1	1	1	1	1	1	1	0	1	0	1	2	1	2	2	2	1	1	2	2	2	4	1	1	7
2011	2	1	1	1	1	1	0	1	1	2	1	2	1	2	2	2	1	1	1	1	1	2	1	2	2	71
2011	2	2	1	1	4	2	1	1	0	1	0	2	1	2	1	2	2	2	2	1	1	2	1	1	1	1
2012	2	2	2	1	4	2	3	2	0	1	0	2	1	2	2	2	1	1	1	2	2	2	4	1	1	1
2012	1	2	2	1	4	2	1	1	2	1	1	1	2	2	1	2	2	1	1	2	2	2	4	2	2	57
2011	2	1	1	1	3	2	0	1	0	1	0	1	1	2	1	2	2	2	2	1	1	2	1	1	1	37
2012	2	2	2	1	3	2	0	1	1	2	1	1	2	2	1	2	2	1	1	2	2	2	4	2	2	55
2011	2	1	2	1	4	2	1	1	0	1	0	2	2	2	2	2	2	5	0	2	2	1	3	2	1	1
2012	2	2	1	1	3	2	1	1	0	1	0	1	1	2	1	2	2	2	2	2	1	2	1	1	1	18
2011	2	1	1	1	2	1	0	1	0	1	0	2	1	2	2	2	1	1	1	1	1	1	2	1	1	28
2011	1	1	2	1	2	1	1	1	1	1	1	1	1	2	2	2	1	1	1	1	1	2	1	1	1	45
2012	2	2	2	1	3	2	2	2	0	1	0	1	2	2	1	2	2	1	1	1	1	2	1	1	1	41
2011	1	3	1	1	2	1	1	1	2	1	1	1	1	2	2	2	1	1	1	1	2	2	1	1	1	42
2012	2	2	2	1	3	2	0	1	2	1	1	1	1	2	2	2	1	1	1	1	2	1	2	1	1	30
2011	2	2	1	3	3	2	3	2	0	1	0	2	2	2	1	2	2	1	1	3	3	3	5	1	1	18
2012	2	2	1	3	2	1	1	1	1	1	1	1	2	1	2	2	2	1	1	2	2	2	4	2	1	4
2012	2	2	1	1	2	1	1	1	0	1	0	2	1	2	1	2	2	2	2	1	2	2	1	1	1	22
2011	2	1	2	1	4	2	3	2	2	2	1	1	2	2	2	2	2	5	0	2	1	2	1	2	2	18
2011	2	1	1	1	2	1	2	2	0	1	0	1	1	1	2	2	2	2	2	1	2	1	2	1	1	33
2011	2	1	2	1	3	2	1	1	1	2	1	1	1	2	2	2	1	1	1	1	1	2	1	1	1	47
2011	1	1	2	1	4	2	1	1	2	2	1	1	1	2	2	2	1	1	1	1	1	2	1	2	2	68
2012	2	2	1	2	2	1	1	1	0	2	0	2	1	2	2	2	1	1	1	1	1	2	1	2	2	55
2011	2	1	2	1	1	1	1	1	0	2	0	2	1	2	1	2	2	2	2	1	2	2	1	1	1	4
2011	2	1	1	1	2	1	0	1	0	1	0	2	1	1	2	2	2	2	2	2	1	2	1	1	1	1
2011	2	1	1	3	1	1	0	1	0	1	0	2	2	2	2	2	2	5	0	1	1	3	5	1	1	29
2011	2	1	2	1	2	1	1	1	0	1	0	2	1	2	2	2	1	1	1	1	1	2	1	1	1	27
2011	2	1	1	1	3	2	1	1	0	1	0	1	1	2	1	2	2	2	2	1	1	3	5	1	1	45
2011	2	1	1	1	1	1	0	1	0	1	0	2	2	1	1	2	2	2	2	1	1	2	1	1	1	1
2011	2	1	2	1	1	1	0	1	2	1	1	2	1	2	2	2	1	1	1	1	1	2	1	2	2	61
2011	2	1	1	3	1	1	1	1	0	1	0	1	1	2	2	2	1	1	1	2	2	2	4	1	1	3
2011	2	1	1	1	2	1	1	1	0	1	0	2	1	1	1	1	2	4	4	1	1	2	1	1	1	62
2011	2	1	1	3	4	2	3	2	0	1	0	1	1	2	1	2	2	2	2	1	1	2	1	1	1	49
2011	2	1	2	1	4	2	3	2	2	2	1	1	1	2	2	2	1	1	1	1	1	2	1	2	2	64
2011	2	1	1	3	1	1	0	1	0	1	0	2	1	1	2	2	2	2	2	3	3	3	5	1	1	0
2011	2	2	1	2	4	2	1	1	0	1	0	1	1	3	3	3	2	5	5	1	1	2	1	1	1	39
2011	2	2	2	1	2	1	3	2	2	2	1	1	2	1	2	2	2	1	1	1	1	1	2	2	2	48
2011	2	1	1	2	2	1	3	2	2	1	1	2	1	2	2	2	1	1	1	1	1	2	1	1	1	62
2011	2	2	1	3	1	1	3	2	0	2	0	2	1	2	2	1	2	2	2	2	2	2	4	1	1	3
2012	2	1	2	1	4	2	3	2	2	2	1	1	1	2	2	1	2	2	2	1	1	2	1	2	1	38
2011	2	1	2	1	4	2	1	1	0	1	0	2	2	1	2	2	2	1	1	1	1	2	1	1	1	1
2012	2	1	1	3	2	1	3	2	0	1	0	2	1	2	2	2	1	1	1	3	3	2	5	1	1	46
2012	1	2	2	1	3	2	0	1	0	1	0	1	2	2	2	2	2	5	0	1	1	2	1	1	1	10
2011	1	2	2	1	1	1	1	1	0	1	0	2	2	2	2	2	2	5	0	1	1	2	1	1	1	0
2012	2	1	2	1	4	2	0	1	0	1	0	2	1	1	2	2	2	2	2	1	1	2	1	1	1	0
2012	2	1	2	1	2	1	0	1	0	1	0	1	1	2	1	2	2	2	2	1	2	2	1	1	1	29
2012	2	2	1	1	4	2	1	1	0	1	0	1	1	2	1	2	2	2	2	1	1	1	2	2	2	57
2012	1	1	2	3	2	1	0	1	2	1	1	1	2	1	2	2	2	1	1	1	1	1	2	2	2	52
2012	2	1	1	3	3	2	3	2	2	2	1	2	2	2	1	2	2	1	1	1	1	2	1	1	1	46
2012	2	1	2	1	3	2	2	2	0	1	0	1	1	2	1	2	2	2	2	2	2	1	3	2	1	1
2012	2	1	1	3	2	1	0	1	0	1	0	2	1	2	2	2	1	1	1	1	1	2	1	2	1	1
2012	2	1	1	3	1	1	0	1	0	1	0	2	1	2	2	2	1	1	1	1	1	2	1	2	2	57
2012	2	1	1	2	3	2	3	2	2	2	1	2	1	2	2	2	1	1	1	1	1	2	1	1	1	41
2012	2	1	1	3	4	2	0	1	2	2	1	2	1	2	1	2	2	2	2	1	1	2	1	1	1	31
2012	2	3	2	1	2	1	3	2	1	2	1	1	1	2	2	2	1	1	1	1	2	1	2	1	1	32
2012	1	2	2	1	3	2	2	2	2	1	1	1	2	1	2	2	2	1	1	2	2	2	4	1	1	16
2012	2	1	2	1	4	2	3	2	0	1	0	1	1	2	1	2	2	2	2	1	2	2	1	1	1	32
2012	2	1	2	1	4	2	2	2	0	1	0	1	2	1	1	2	2	2	2	2	2	1	3	1	1	25
2012	1	1	1	3	1	1	1	1	0	1	0	1	1	2	2	2	1	1	1	1	1	2	1	1	1	32
2012	2	2	1	1	1	1	0	1	0	2	0	2	1	2	3	2	2	5	5	1	1	2	1	2	2	57
2012	2	1	2	1	1	1	1	1	0	1	0	1	1	2	1	2	2	2	2	1	1	1	2	2	2	49
2012	2	2	1	3	3	2	1	1	0	1	0	2	2	2	1	2	2	1	1	2	2	2	4	1	1	0
2012	2	1	1	1	1	1	1	1	0	1	0	1	2	2	2	2	2	5	0	1	2	2	1	1	1	16
2012	2	1	2	1	4	2	1	1	0	1	0	2	2	2	1	2	2	1	1	1	1	2	1	1	1	0
2012	2	1	1	1	2	1	0	1	0	1	0	2	1	2	2	2	1	1	1	1	1	2	1	2	2	56
2012	1	2	2	1	2	1	1	1	2	1	1	1	2	1	2	2	2	1	1	1	1	1	2	2	2	54
2012	2	1	1	1	2	1	0	1	0	1	0	2	2	1	1	2	2	2	2	1	1	2	1	1	1	1
2012	2	1	1	1	4	2	1	1	0	1	0	1	2	2	1	2	2	1	1	1	2	2	1	2	2	48
2012	2	1	1	1	2	1	0	1	0	2	0	2	1	2	1	2	2	2	2	1	1	2	1	1	1	15
2012	2	1	1	1	1	1	0	1	1	1	1	2	2	1	2	2	2	1	1	2	2	2	4	1	1	0
2012	2	1	2	1	3	2	1	1	0	1	0	2	1	2	2	2	1	1	1	2	2	2	4	1	1	3
2012	2	1	1	2	4	2	2	2	0	1	0	2	1	2	2	2	1	1	1	1	2	2	1	1	1	2
2012	2	1	1	1	3	2	3	2	0	1	0	1	2	1	1	2	2	2	2	2	2	2	4	1	1	43
2012	2	1	1	1	1	1	0	1	0	1	0	2	1	1	2	2	2	2	2	1	1	2	1	2	2	58
2012	2	1	2	1	4	2	1	1	2	1	1	2	2	2	1	2	2	1	1	2	2	2	4	1	1	3
2012	2	1	2	1	4	2	0	1	0	1	0	1	1	2	2	2	1	1	1	1	2	2	1	2	2	48
2012	2	2	2	1	3	2	2	2	0	1	0	1	2	1	1	2	2	2	2	2	2	2	4	1	1	12
2012	2	1	2	1	4	2	1	1	0	1	0	2	1	1	1	2	2	3	3	1	1	1	2	1	1	4
2012	2	1	2	3	4	2	1	1	2	2	1	1	2	2	2	2	2	5	0	2	2	1	3	2	2	58
2012	2	1	1	1	2	1	0	1	0	1	0	2	1	2	2	2	1	1	1	1	1	2	1	1	1	2
2012	1	1	2	3	2	1	0	1	0	1	0	1	2	1	2	2	2	1	1	1	2	2	1	1	1	13
2012	1	1	2	3	4	2	1	1	0	1	0	1	1	2	2	2	1	1	1	1	2	1	2	2	2	50
2012	2	2	2	1	1	1	1	1	2	2	1	1	1	2	2	2	1	1	1	2	2	1	3	1	1	55
2012	2	3	1	1	2	1	2	2	0	2	0	2	1	2	2	2	1	1	1	1	1	3	5	2	2	3
2012	2	2	1	1	4	2	1	1	0	1	0	2	2	1	1	1	2	3	3	2	2	1	3	1	1	3
2012	1	1	1	1	1	1	0	1	0	1	0	1	1	1	1	1	2	4	4	2	2	2	4	1	1	8
2012	2	1	2	1	4	2	2	2	2	2	1	1	1	2	2	2	1	1	1	1	1	2	1	1	1	21
2012	1	1	2	1	2	1	0	1	2	1	1	1	1	2	2	2	1	1	1	1	1	1	2	2	2	55
2012	2	2	2	1	3	2	1	1	0	1	0	1	1	1	2	2	2	2	2	1	2	1	2	2	2	50
2013	2	2	2	1	4	2	1	1	0	2	0	1	1	2	2	2	1	1	1	2	2	2	4	2	1	11
2012	2	1	2	1	3	2	1	1	0	1	0	2	2	1	2	2	2	1	1	2	2	1	3	1	1	1
2012	2	1	2	1	2	1	1	1	0	1	0	1	2	1	2	2	2	1	1	1	1	2	1	2	2	48
2012	2	1	1	1	2	1	0	1	1	2	1	1	1	2	2	2	1	1	1	1	1	2	1	1	1	49
2012	2	1	1	1	2	1	3	2	1	2	1	2	1	2	2	2	1	1	1	1	1	2	1	2	2	50
2012	2	2	1	3	1	1	0	1	0	1	0	2	1	1	1	3	2	5	5	2	2	2	4	1	1	1
2012	2	1	1	2	3	2	1	1	0	1	0	2	1	1	2	2	2	2	2	1	1	2	1	1	1	1
2012	2	1	1	2	1	1	0	1	0	1	0	2	1	2	2	2	1	1	1	1	1	2	1	1	1	5
2012	2	1	1	3	2	1	1	1	0	1	0	2	1	2	2	2	1	1	1	1	1	2	1	1	1	23
2012	2	1	1	1	4	2	1	1	0	1	0	2	2	1	2	2	2	1	1	2	2	2	4	1	1	1
2012	2	2	2	1	4	2	1	1	0	2	0	1	1	2	1	2	2	2	2	1	1	2	1	1	1	39
2013	2	2	2	1	2	1	1	1	0	1	0	1	1	1	2	2	2	2	2	1	1	1	2	2	2	45
2012	2	1	1	3	1	1	0	1	0	2	0	1	1	3	2	2	2	5	5	3	3	3	5	2	2	54
2012	2	1	1	3	2	1	1	1	0	1	0	2	1	2	2	2	1	1	1	1	2	2	1	1	1	26
2012	2	1	1	3	1	1	1	1	0	1	0	2	2	2	2	2	2	5	0	1	1	2	1	1	1	34
2012	1	2	2	1	4	2	2	2	2	2	1	1	2	2	1	2	2	1	1	2	1	2	1	2	2	52
2012	2	3	2	1	2	1	0	1	0	1	0	2	1	2	2	2	1	1	1	1	1	2	1	1	1	18
2012	2	1	1	1	1	1	1	1	1	2	1	1	1	2	2	2	1	1	1	1	2	1	2	2	2	48
2012	2	1	1	1	4	2	3	2	2	1	1	2	1	2	1	2	2	2	2	1	1	1	2	1	1	0
2012	2	2	2	1	2	1	1	1	0	1	0	1	2	2	2	1	2	1	1	2	2	2	4	1	1	5
2012	2	1	1	3	1	1	2	2	0	1	0	1	1	1	2	1	2	3	3	2	2	2	4	1	1	9
2012	2	1	1	1	4	2	1	1	0	1	0	1	1	1	2	2	2	2	2	2	2	1	3	1	1	50
2012	2	1	2	1	2	1	2	2	0	1	0	2	2	2	2	1	2	1	1	2	2	2	4	1	1	2
2012	1	1	2	1	4	2	2	2	0	1	0	1	1	1	2	2	2	2	2	2	2	1	3	1	1	26
2012	2	1	1	1	2	1	1	1	0	1	0	1	1	2	2	2	1	1	1	3	3	3	5	1	1	18
2012	1	1	2	1	2	1	1	1	2	2	1	1	1	2	2	2	1	1	1	1	1	2	1	2	2	48
2012	1	1	2	3	2	1	3	2	2	1	1	1	1	2	2	2	1	1	1	1	1	1	2	2	2	49
2012	2	1	1	2	2	1	1	1	0	1	0	2	3	2	2	2	2	5	5	1	1	2	1	2	2	54
2012	2	1	2	3	4	2	0	1	2	2	1	1	1	2	2	2	1	1	1	2	2	2	4	1	1	17
2013	2	2	1	2	2	1	0	1	0	1	0	2	1	2	1	3	2	5	5	1	2	1	2	1	1	1
2012	2	2	1	3	2	1	0	1	0	1	0	2	1	2	1	2	2	2	2	1	1	2	1	1	1	12
2012	2	2	2	1	2	1	0	1	0	1	0	1	1	2	2	2	1	1	1	1	2	1	2	2	2	50
2012	2	2	1	1	2	1	1	1	0	1	0	1	1	1	1	2	2	3	3	2	2	1	3	2	2	54
2012	2	1	1	3	4	2	3	2	0	1	0	2	1	2	2	2	1	1	1	1	1	3	5	1	1	0
2012	2	1	1	3	1	1	1	1	0	1	0	2	1	2	2	2	1	1	1	3	3	2	5	1	1	3
2013	2	1	1	1	2	1	1	1	0	1	0	1	1	1	1	2	2	3	3	1	1	2	1	1	1	28
2012	2	2	1	1	2	1	1	1	0	1	0	1	1	2	2	2	1	1	1	1	1	2	1	2	2	48
2012	1	2	1	1	2	1	1	1	1	2	1	1	1	2	2	2	1	1	1	2	2	1	3	2	2	49
2012	2	1	1	2	1	1	1	1	0	1	0	1	1	1	2	2	2	2	2	1	1	2	1	1	1	8
2013	1	2	2	1	4	2	1	1	0	2	0	1	2	2	2	1	2	1	1	2	2	1	3	1	1	18
2012	2	1	2	1	2	1	1	1	0	1	0	2	1	2	2	2	1	1	1	2	2	2	4	1	1	12
2013	2	3	2	1	2	1	1	1	0	1	0	1	1	1	1	2	2	3	3	2	2	1	3	2	2	47
2013	2	1	1	3	1	1	1	1	0	1	0	2	2	1	1	2	2	2	2	3	3	3	5	1	1	0
2013	2	1	2	1	4	2	1	1	0	1	0	1	1	1	1	1	2	4	4	2	2	2	4	1	1	11
2013	1	1	1	1	4	2	1	1	0	1	0	1	1	2	2	2	1	1	1	2	2	2	4	1	1	14
2013	2	1	1	2	2	1	3	2	2	2	1	2	1	2	2	2	1	1	1	1	1	2	1	2	2	47
2013	2	3	3	3	2	1	1	1	1	2	1	1	1	2	2	2	1	1	1	1	1	2	1	2	2	46
2012	2	2	1	2	1	1	0	1	0	1	0	2	1	2	2	2	1	1	1	1	1	2	1	1	1	27
2012	2	1	2	1	3	2	1	1	0	1	0	1	1	2	2	2	1	1	1	1	2	2	1	1	1	21
2012	2	2	2	1	1	1	1	1	0	1	0	2	3	3	3	1	2	5	5	2	2	1	3	1	1	2
2013	2	1	1	1	2	1	0	1	0	1	0	1	2	2	1	2	2	1	1	1	1	2	1	2	2	43
2012	2	3	1	1	2	1	2	2	1	2	1	2	2	2	2	2	2	5	0	1	1	2	1	2	2	55
2013	2	1	1	1	2	1	3	2	1	2	1	1	1	2	2	2	1	1	1	1	1	2	1	1	1	45
2013	1	1	2	3	2	1	0	1	0	1	0	2	1	2	2	2	1	1	1	1	1	1	2	2	2	45
2012	2	1	1	2	4	2	3	2	0	1	0	1	2	2	2	1	2	1	1	2	2	2	4	1	1	2
2012	2	1	1	1	1	1	0	1	0	1	0	1	1	2	1	2	2	2	2	1	1	2	1	1	1	5
2012	2	1	2	1	4	2	1	1	2	2	1	1	2	1	2	2	2	1	1	2	1	1	2	1	1	52
2012	2	1	2	1	4	2	1	1	0	2	0	1	1	2	2	2	1	1	1	1	2	1	2	1	1	4
2012	2	2	2	1	4	2	1	1	2	1	1	1	2	2	2	2	2	5	0	2	2	2	4	1	1	6
2012	2	1	2	1	3	2	3	2	0	1	0	1	2	2	2	2	2	5	0	1	1	2	1	2	2	52
2012	2	1	2	1	4	2	3	2	0	1	0	1	1	1	2	2	2	2	2	2	2	2	4	1	1	11
2013	2	2	1	2	3	2	0	1	0	1	0	2	1	2	2	2	1	1	1	1	1	2	1	2	2	43
2012	2	2	2	3	3	2	0	1	0	1	0	1	1	1	1	2	2	3	3	1	1	1	2	1	1	27
2012	2	1	1	1	4	2	0	1	0	1	0	1	1	1	1	2	2	3	3	1	1	2	1	1	1	7
2013	2	1	1	2	2	1	0	1	1	1	1	1	2	1	2	2	2	1	1	1	2	2	1	1	1	7
2013	1	2	2	1	2	1	2	2	1	1	1	1	1	2	2	2	1	1	1	2	2	2	4	2	2	44
2012	2	1	1	1	4	2	0	1	2	1	1	1	1	2	2	2	1	1	1	1	1	2	1	2	2	51
2013	2	2	2	1	2	1	0	1	1	2	1	1	2	1	1	2	2	2	2	2	2	2	4	2	2	47
2013	2	1	1	1	2	1	0	1	0	1	0	1	2	2	2	2	2	5	0	1	1	1	2	2	2	43
2013	2	1	1	1	4	2	2	2	0	1	0	1	1	1	1	2	2	3	3	1	1	2	1	2	2	44
2013	2	1	1	3	2	1	0	1	0	1	0	2	2	2	1	2	2	1	1	1	2	1	2	2	2	44
2013	2	2	1	1	2	1	1	1	0	1	0	1	2	2	1	2	2	1	1	1	1	2	1	1	1	29
2013	2	1	1	1	4	2	1	1	0	1	0	2	1	2	2	2	1	1	1	1	1	2	1	1	1	23
2013	2	1	1	3	2	1	3	2	0	1	0	1	1	2	2	2	1	1	1	3	3	3	5	1	1	15
2013	2	2	1	1	3	2	1	1	0	1	0	2	1	2	2	1	2	2	2	1	1	2	1	1	1	8
2013	1	2	2	1	4	2	1	1	2	1	1	1	1	1	2	3	2	5	5	1	1	1	2	2	2	45
2013	2	1	1	1	2	1	0	1	0	1	0	2	1	2	2	2	1	1	1	1	1	2	1	1	1	14
2013	2	1	1	1	2	1	1	1	1	2	1	1	2	1	2	2	2	1	1	1	1	2	1	2	2	42
2013	2	1	1	1	2	1	0	1	0	1	0	2	1	2	1	2	2	2	2	1	1	3	5	1	1	2
2013	1	2	2	1	2	1	3	2	2	2	1	1	2	2	2	2	2	5	0	1	1	1	2	2	2	42
2013	2	2	1	1	2	1	1	1	0	1	0	2	1	1	2	2	2	2	2	1	1	1	2	1	1	1
2013	1	2	2	1	3	2	1	1	0	1	0	1	2	2	1	2	2	1	1	1	2	1	2	2	2	41
2013	2	1	1	3	1	1	0	1	0	1	0	1	2	1	2	2	2	1	1	1	2	1	2	1	1	0
2013	2	2	2	1	2	1	1	1	2	2	1	1	1	2	2	2	1	1	1	1	2	1	2	2	2	42
2013	2	3	1	1	4	2	1	1	2	2	1	1	1	2	2	2	1	1	1	1	1	2	1	2	2	42
2012	2	1	1	2	4	2	1	1	2	1	1	1	1	2	2	2	1	1	1	1	2	2	1	2	2	50
2013	1	1	1	1	3	2	1	1	2	2	1	1	1	2	2	2	1	1	1	1	1	1	2	2	2	39
2012	2	3	1	1	2	1	0	1	0	1	0	1	1	2	2	1	2	2	2	1	1	1	2	1	1	3
2012	2	1	1	1	3	2	1	1	2	2	1	1	1	2	2	2	1	1	1	1	2	2	1	1	1	45
2011	2	1	1	3	2	1	0	1	0	1	0	1	1	3	3	2	2	5	5	3	3	3	5	1	1	14
2013	2	2	2	1	4	2	3	2	2	2	1	1	1	2	2	2	1	1	1	2	2	2	4	1	1	21
2013	2	1	1	3	1	1	1	1	0	2	0	1	1	2	2	2	1	1	1	1	1	2	1	2	2	39
2013	2	1	2	1	2	1	1	1	0	1	0	2	2	2	3	2	2	5	5	1	1	1	2	1	1	4
2012	2	1	1	3	4	2	2	2	0	1	0	2	2	2	2	2	2	5	0	1	1	2	1	1	1	0
2013	2	1	1	3	4	2	1	1	0	1	0	2	2	2	1	2	2	1	1	3	3	3	5	1	1	16
2013	2	1	1	1	4	2	1	1	0	1	0	1	1	1	1	2	2	3	3	1	1	2	1	2	1	28
2013	2	1	1	3	3	2	1	1	0	1	0	2	1	2	2	2	1	1	1	1	1	1	2	2	2	40
2013	1	1	1	1	3	2	0	1	0	1	0	2	1	2	2	2	1	1	1	1	1	2	1	2	2	40
2013	2	2	1	1	4	2	1	1	0	1	0	2	1	1	1	2	2	3	3	3	3	3	5	1	1	0
2013	2	1	2	3	3	2	1	1	2	1	1	2	1	3	3	3	2	5	5	1	1	2	1	2	1	13
2013	2	1	1	1	4	2	3	2	0	1	0	1	1	1	2	2	2	2	2	2	2	2	4	1	1	6
2013	2	1	2	1	1	1	0	1	0	1	0	2	1	2	1	1	2	3	3	2	2	1	3	2	1	4
2013	2	1	1	1	1	1	1	1	0	1	0	2	1	2	2	2	1	1	1	1	1	3	5	2	2	43
2013	2	1	1	1	2	1	0	1	0	1	0	1	1	2	2	2	1	1	1	1	1	3	5	2	2	45
2013	1	1	2	1	4	2	0	1	0	1	0	2	1	2	2	2	1	1	1	1	1	2	1	1	1	1
2012	2	3	1	3	3	2	1	1	0	1	0	2	1	1	2	2	2	2	2	1	1	3	5	1	1	2
2013	1	1	1	1	1	1	1	1	0	1	0	2	1	2	1	2	2	2	2	1	1	2	1	1	1	26
2013	2	1	2	1	3	2	0	1	1	1	1	2	1	2	2	2	1	1	1	1	1	2	1	2	1	20
2013	2	1	1	1	2	1	0	1	0	1	0	2	2	1	2	2	2	1	1	1	1	2	1	1	1	3
2013	2	2	2	1	4	2	1	1	0	1	0	2	1	2	2	2	1	1	1	1	1	2	1	1	1	3
2013	1	1	2	1	4	2	2	2	2	1	1	1	1	2	2	2	1	1	1	1	1	2	1	2	2	41
2013	1	3	1	1	4	2	2	2	2	2	1	1	1	2	2	2	1	1	1	1	1	2	1	2	2	34
2013	2	1	1	1	2	1	0	1	0	1	0	2	2	2	2	2	2	5	0	1	1	1	2	1	1	26
2013	2	2	2	1	4	2	1	1	0	1	0	2	2	2	2	2	2	5	0	1	1	2	1	1	1	11
2013	2	1	2	1	4	2	3	2	2	2	1	1	1	1	2	2	2	2	2	2	2	2	4	1	1	25
2013	2	2	2	1	2	1	1	1	0	1	0	2	1	2	2	2	1	1	1	2	2	2	4	2	1	0
2013	2	2	2	1	2	1	1	1	1	2	1	1	1	1	1	2	2	3	3	2	2	1	3	1	1	29
2013	2	2	2	1	4	2	1	1	1	2	1	1	1	2	2	2	1	1	1	2	2	2	4	2	2	39
2013	2	2	1	1	4	2	1	1	0	1	0	2	1	2	2	2	1	1	1	3	3	3	5	2	1	2
2013	1	3	2	1	2	1	1	1	0	1	0	1	2	2	1	2	2	1	1	2	2	2	4	1	1	1
2013	2	3	2	1	1	1	3	2	1	1	1	1	2	2	2	2	2	5	0	2	2	1	3	1	1	24
2013	2	2	1	1	1	1	0	1	1	2	1	2	2	2	2	2	2	5	0	1	1	2	1	2	1	4
2013	2	1	1	3	4	2	1	1	2	2	1	1	1	2	1	1	2	3	3	1	1	2	1	1	1	41
2013	2	1	1	2	2	1	3	2	0	1	0	2	1	1	2	2	2	2	2	1	1	2	1	2	2	38
2013	2	1	2	1	2	1	1	1	0	1	0	2	1	2	2	2	1	1	1	1	2	2	1	1	1	20
2013	2	2	2	1	3	2	1	1	2	2	1	2	1	1	1	2	2	3	3	2	2	2	4	1	1	10
2013	2	1	1	1	4	2	1	1	0	1	0	1	1	2	2	2	1	1	1	2	2	2	4	1	1	10
2013	2	1	2	1	3	2	3	2	0	1	0	1	1	1	1	2	2	3	3	1	1	2	1	1	1	11
2013	2	1	2	1	3	2	3	2	2	2	1	1	1	2	2	2	1	1	1	1	1	2	1	1	1	30
2013	2	1	1	1	2	1	0	1	0	1	0	2	2	1	2	2	2	1	1	1	2	2	1	1	1	32
2013	1	1	1	1	2	1	1	1	2	1	1	2	2	2	1	2	2	1	1	1	1	2	1	2	2	37
2014	2	2	2	1	2	1	1	1	0	1	0	1	1	1	1	2	2	3	3	2	2	2	4	1	1	10
2013	2	1	1	3	2	1	0	1	0	1	0	2	2	2	1	2	2	1	1	1	1	2	1	2	2	36
2013	2	1	1	1	4	2	2	2	2	2	1	1	2	2	2	2	2	5	0	1	1	2	1	2	2	42
2013	2	1	1	3	3	2	3	2	2	1	1	2	1	2	2	2	1	1	1	1	1	2	1	1	1	32
2013	2	2	1	1	4	2	1	1	0	1	0	2	1	2	3	2	2	5	5	2	1	2	1	1	1	0
2013	2	1	1	1	4	2	2	2	2	1	1	2	2	2	2	2	2	5	0	1	1	2	1	2	2	38
2013	1	1	1	1	2	1	0	1	0	2	0	2	1	1	1	2	2	3	3	1	1	2	1	1	1	28
2013	1	1	1	1	2	1	1	1	0	1	0	1	1	1	2	2	2	2	2	2	2	2	4	1	1	6
2013	1	2	1	1	4	2	0	1	0	1	0	1	2	2	1	2	2	1	1	1	1	2	1	2	2	37
2013	2	2	2	1	1	1	1	1	2	1	1	2	1	2	2	2	1	1	1	1	1	2	1	2	2	36
2013	2	2	2	1	4	2	1	1	0	1	0	2	3	2	1	2	2	5	5	1	1	2	1	1	1	17
2013	2	1	1	2	4	2	1	1	0	1	0	2	1	1	1	1	2	4	4	1	1	2	1	1	1	0
2013	2	1	1	1	4	2	1	1	2	1	1	1	2	1	2	2	2	1	1	2	2	1	3	2	2	36
2013	2	1	2	3	4	2	0	1	0	1	0	2	1	1	1	2	2	3	3	3	3	3	5	1	1	0
2013	2	1	2	1	2	1	1	1	0	1	0	1	1	1	2	2	2	2	2	1	1	1	2	2	2	38
2013	2	2	2	1	2	1	1	1	0	2	0	2	1	2	2	2	1	1	1	1	1	2	1	2	2	39
2013	1	2	2	1	2	1	1	1	0	1	0	2	1	1	2	2	2	2	2	1	2	2	1	2	2	37
2013	1	2	1	2	4	2	1	1	0	1	0	2	1	2	2	2	1	1	1	1	1	2	1	1	1	19
2014	1	2	1	1	4	2	0	1	0	1	0	1	1	1	1	2	2	3	3	1	1	1	2	1	1	18
2013	2	1	1	1	3	2	1	1	0	1	0	1	1	1	1	2	2	3	3	2	2	1	3	2	2	41
2013	2	1	1	1	3	2	1	1	0	2	0	1	1	1	1	2	2	3	3	1	1	2	1	1	1	3
2013	2	1	1	1	1	1	0	1	1	1	1	2	1	1	1	2	2	3	3	1	1	2	1	2	2	44
2013	2	1	1	1	4	2	1	1	0	1	0	1	1	1	1	2	2	3	3	1	1	2	1	1	1	6
2014	2	1	1	3	4	2	3	2	0	1	0	2	1	1	1	2	2	3	3	3	3	3	5	1	1	1
2013	2	1	2	3	2	1	1	1	0	1	0	2	1	1	1	1	2	4	4	2	2	3	5	1	1	2
2013	2	1	2	1	4	2	1	1	0	1	0	1	1	2	2	2	1	1	1	1	1	1	2	1	1	11
2014	1	2	2	1	4	2	2	2	2	2	1	1	2	2	1	2	2	1	1	1	1	1	2	2	2	34
2014	2	2	1	1	4	2	2	2	0	1	0	1	1	2	1	2	2	2	2	1	1	2	1	2	2	34
2014	1	3	2	1	3	2	3	2	0	1	0	1	2	2	1	2	2	1	1	2	2	2	4	1	1	22
2013	2	1	1	1	2	1	1	1	0	1	0	1	2	1	2	2	2	1	1	2	2	1	3	2	2	39
2013	2	2	1	1	4	2	0	1	1	1	1	2	1	2	2	2	1	1	1	1	1	2	1	1	1	8
2013	2	1	1	1	2	1	1	1	0	2	0	2	1	2	2	2	1	1	1	1	1	2	1	2	2	36
2013	2	1	1	1	2	1	1	1	0	1	0	2	1	1	1	2	2	3	3	1	1	2	1	2	1	17
2014	2	1	2	2	1	1	0	1	1	1	1	2	2	1	2	2	2	1	1	2	2	2	4	1	1	31
2013	2	2	1	3	4	2	1	1	0	2	0	2	1	2	2	2	1	1	1	1	1	3	5	1	1	8
2013	2	2	1	1	2	1	2	2	2	1	1	2	2	1	2	2	2	1	1	1	1	2	1	2	1	4
2014	1	3	3	1	2	1	1	1	2	2	1	2	1	2	2	2	1	1	1	1	1	2	1	2	2	35
2013	2	2	3	1	2	1	1	1	2	2	1	1	1	2	2	2	1	1	1	2	2	2	4	2	2	38
2014	1	2	2	1	3	2	2	2	0	1	0	1	1	1	2	2	2	2	2	1	1	2	1	1	1	18
2014	2	1	1	1	4	2	1	1	2	1	1	2	1	1	1	2	2	3	3	1	1	2	1	2	2	33
2014	2	1	1	3	2	1	1	1	1	1	1	1	1	1	2	2	2	2	2	1	2	2	1	2	2	32
2014	2	1	1	3	4	2	1	1	0	1	0	2	1	1	2	2	2	2	2	2	2	1	3	1	1	6
2013	2	2	3	1	3	2	2	2	2	2	1	1	2	2	1	2	2	1	1	2	2	2	4	1	1	14
2013	2	1	2	1	2	1	1	1	0	1	0	1	1	2	1	2	2	2	2	1	1	2	1	2	2	37
2014	1	2	2	1	3	2	2	2	1	2	1	1	1	2	2	2	1	1	1	2	2	2	4	1	1	13
2013	2	1	1	3	3	2	3	2	0	2	0	1	2	2	2	2	2	5	0	3	3	3	5	2	2	36
2013	2	1	1	2	4	2	0	1	0	1	0	2	1	1	1	1	2	4	4	1	1	2	1	1	1	0
2013	2	1	1	1	2	1	1	1	0	1	0	1	1	1	2	2	2	2	2	2	2	1	3	1	1	4
2013	2	2	2	1	4	2	2	2	0	1	0	2	1	2	2	2	1	1	1	1	1	1	2	1	1	44
2014	2	1	1	1	2	1	1	1	0	1	0	1	2	2	1	2	2	1	1	2	1	1	2	2	2	35
2014	2	1	1	3	2	1	0	1	0	1	0	2	1	1	1	1	2	4	4	2	2	1	3	1	1	5
2013	2	1	1	1	3	2	0	1	2	1	1	1	1	2	2	2	1	1	1	1	1	1	2	1	1	41
2014	2	1	1	1	4	2	1	1	0	1	0	2	1	2	2	2	1	1	1	1	1	2	1	1	1	13
2014	2	1	1	1	4	2	3	2	2	2	1	1	2	2	2	2	2	5	0	1	1	2	1	2	2	33
2014	2	1	1	1	3	2	1	1	0	1	0	2	1	1	1	2	2	3	3	1	2	2	1	1	1	13
2014	2	2	1	1	4	2	1	1	2	2	1	1	1	1	2	2	2	2	2	1	1	2	1	1	1	26
2014	1	1	2	1	3	2	1	1	0	1	0	2	3	3	3	3	2	5	5	1	1	2	1	1	1	1
2014	2	1	2	1	4	2	3	2	1	2	1	1	2	2	2	2	2	5	0	2	2	2	4	1	1	29
2013	2	2	2	1	4	2	3	2	0	1	0	1	1	1	1	2	2	3	3	2	2	1	3	1	1	2
2013	2	1	2	1	2	1	1	1	0	1	0	2	1	2	2	2	1	1	1	1	1	2	1	1	1	28
2013	2	1	2	1	3	2	0	1	0	1	0	2	1	1	1	2	2	3	3	2	2	2	4	1	1	0
2013	2	2	1	1	2	1	1	1	0	1	0	2	1	3	1	2	2	5	5	1	1	2	1	1	1	19
2013	2	2	2	1	3	2	1	1	2	1	1	2	2	2	1	2	2	1	1	1	1	2	1	2	1	3
2014	2	1	2	1	3	2	1	1	0	1	0	1	1	1	2	2	2	2	2	1	1	2	1	2	2	32
2014	1	2	2	1	4	2	3	2	0	1	0	1	2	2	2	2	2	5	0	2	2	2	4	1	1	8
2014	2	2	2	1	2	1	1	1	1	1	1	1	1	2	2	2	1	1	1	2	2	2	4	1	1	10
2014	2	2	2	1	2	1	1	1	0	1	0	2	2	2	1	1	2	2	2	2	2	1	3	1	1	0
2013	2	2	1	3	2	1	1	1	0	1	0	2	2	1	1	2	2	2	2	1	1	2	1	2	2	37
2013	2	2	3	3	4	2	2	2	2	2	1	1	1	2	2	2	1	1	1	1	1	2	1	2	2	44
2014	2	2	1	1	3	2	1	1	0	2	0	1	1	2	2	1	2	2	2	1	1	1	2	1	1	2
2014	2	1	1	3	3	2	2	2	0	1	0	2	1	2	2	2	1	1	1	3	3	3	5	1	1	12
2013	2	2	1	2	2	1	1	1	0	1	0	2	1	2	2	2	1	1	1	1	2	2	1	2	2	36
2014	1	1	1	1	4	2	1	1	0	2	0	1	1	2	2	2	1	1	1	1	1	2	1	1	1	21
2014	1	1	1	1	2	1	0	1	0	1	0	2	1	2	2	2	1	1	1	1	1	2	1	2	2	33
2013	2	1	1	1	2	1	1	1	0	1	0	2	1	1	2	2	2	2	2	1	1	2	1	1	1	26
2014	2	1	1	1	4	2	2	2	2	1	1	2	3	3	3	3	2	5	5	1	2	1	2	1	1	3
2014	2	2	1	1	3	2	1	1	0	1	0	2	1	2	1	2	2	2	2	1	1	2	1	2	2	32
2014	2	2	1	1	2	1	0	1	0	1	0	2	1	2	2	2	1	1	1	1	1	2	1	1	1	30
2014	2	1	1	3	2	1	0	1	0	1	0	2	1	2	2	2	1	1	1	3	3	3	5	2	1	0
2014	2	1	1	3	2	1	1	1	0	1	0	1	1	2	3	2	2	5	5	1	1	2	1	2	2	32
2014	2	1	1	1	2	1	1	1	0	1	0	1	1	2	1	2	2	2	2	1	2	2	1	2	2	32
2014	2	1	1	1	2	1	2	2	0	2	0	1	1	2	2	2	1	1	1	1	1	2	1	1	1	19
2014	2	1	1	1	3	2	1	1	0	1	0	2	1	1	2	2	2	2	2	1	1	2	1	1	1	1
2014	2	1	2	1	4	2	1	1	2	1	1	1	2	1	1	2	2	2	2	2	2	2	4	1	1	28
2014	2	1	2	1	4	2	3	2	0	1	0	1	2	2	1	2	2	1	1	2	2	2	4	1	1	1
2014	2	2	3	2	4	2	1	1	2	2	1	1	1	2	2	2	1	1	1	2	1	1	2	1	1	11
2014	2	2	1	1	4	2	2	2	0	1	0	2	2	1	1	2	2	2	2	2	2	2	4	1	1	2
2014	2	1	2	1	2	1	1	1	0	1	0	1	2	2	1	2	2	1	1	2	2	1	3	2	2	32
2014	2	1	2	1	4	2	0	1	0	1	0	1	2	2	1	2	2	1	1	2	2	2	4	1	1	9
2014	2	2	2	3	4	2	1	1	2	1	1	1	3	1	1	3	2	5	5	2	2	2	4	1	1	7
2014	2	1	1	1	3	2	1	1	0	1	0	2	2	2	1	2	2	1	1	1	1	2	1	2	2	29
2014	1	1	2	1	2	1	0	1	0	1	0	1	2	1	2	2	2	1	1	2	2	2	4	2	2	32
2014	2	1	1	3	2	1	0	1	0	1	0	2	1	1	1	2	2	3	3	3	3	3	5	1	1	0
2013	1	2	2	1	4	2	0	1	2	2	1	1	1	2	1	2	2	2	2	2	2	1	3	2	2	38
2014	1	1	1	1	3	2	1	1	0	1	0	2	1	2	2	2	1	1	1	1	1	2	1	2	2	31
2014	2	1	2	1	4	2	2	2	2	2	1	2	2	1	1	2	2	2	2	1	1	2	1	1	1	20
2014	1	1	2	1	3	2	1	1	2	2	1	1	2	2	1	2	2	1	1	2	2	1	3	2	2	32
2014	2	1	2	1	4	2	3	2	2	1	1	1	1	1	2	2	2	2	2	2	2	2	4	1	1	6
2014	2	2	1	1	1	1	0	1	2	1	1	1	2	2	1	2	2	1	1	1	1	2	1	2	2	32
2013	2	1	1	3	4	2	0	1	0	1	0	2	2	1	2	2	2	1	1	3	3	3	5	2	1	0
2014	2	1	2	3	2	1	1	1	1	1	1	1	2	1	2	2	2	1	1	2	2	2	4	2	2	29
2014	2	1	1	1	2	1	1	1	1	2	1	1	2	2	2	2	2	5	0	1	1	1	2	2	2	28
2014	2	1	1	1	2	1	1	1	1	2	1	1	2	2	2	2	2	5	0	1	1	2	1	2	2	28
2014	2	1	2	1	4	2	1	1	0	2	0	1	2	2	1	2	2	1	1	2	2	2	4	2	2	28
2014	2	1	3	3	4	2	0	1	2	2	1	1	2	2	2	2	2	5	0	2	3	3	5	1	1	22
2014	1	1	2	1	3	2	0	1	0	1	0	2	1	1	1	2	2	3	3	3	3	3	5	1	1	0
2014	1	1	3	2	1	1	0	1	1	2	1	2	1	2	2	2	1	1	1	1	1	2	1	2	2	30
2014	2	2	1	2	2	1	1	1	0	2	0	2	1	2	2	2	1	1	1	1	1	2	1	1	1	9
2014	2	2	1	1	1	1	1	1	0	1	0	1	1	2	1	2	2	2	2	1	2	2	1	2	2	29
2014	2	1	2	3	3	2	0	1	0	1	0	2	2	2	1	1	2	2	2	3	3	3	5	1	1	4
2014	2	1	1	3	4	2	2	2	0	1	0	2	1	1	2	1	2	3	3	2	2	2	4	1	1	1
2014	2	1	1	1	2	1	0	1	0	1	0	2	1	2	2	2	1	1	1	1	1	2	1	2	2	27
2013	2	1	1	1	2	1	1	1	0	1	0	2	1	2	1	2	2	2	2	1	1	2	1	1	1	32
2014	2	1	1	1	4	2	3	2	2	1	1	2	2	1	1	2	2	2	2	1	1	2	1	2	2	27
2014	2	1	1	3	3	2	0	1	0	1	0	2	1	2	2	2	1	1	1	1	2	2	1	1	1	21
2014	2	2	2	1	4	2	1	1	0	1	0	2	1	1	2	2	2	2	2	1	1	1	2	1	1	11
2014	2	2	2	1	4	2	1	1	2	1	1	2	1	2	2	2	1	1	1	1	2	2	1	2	2	34
2014	2	1	1	1	2	1	0	1	0	1	0	2	1	2	2	2	1	1	1	1	1	2	1	1	1	29
2014	2	2	2	3	3	2	1	1	0	1	0	2	2	2	1	2	2	1	1	1	1	2	1	1	1	2
2014	2	1	1	1	2	1	1	1	0	1	0	2	1	2	2	2	1	1	1	1	1	2	1	2	2	33
2014	2	1	1	1	2	1	3	2	0	1	0	2	1	1	1	2	2	3	3	1	1	2	1	2	2	28
2014	2	1	1	1	2	1	0	1	0	1	0	2	1	1	2	2	2	2	2	1	1	2	1	2	1	0
2014	2	2	1	1	2	1	1	1	0	2	0	2	2	2	1	2	2	1	1	1	2	2	1	2	2	25
2014	2	1	1	3	4	2	0	1	0	1	0	2	1	2	2	2	1	1	1	1	1	2	1	2	2	26
2014	2	1	1	2	2	1	0	1	0	1	0	2	1	2	2	2	1	1	1	1	1	2	1	1	1	0
2014	2	1	1	1	4	2	1	1	0	1	0	1	2	2	1	2	2	1	1	2	2	2	4	1	1	2
2014	2	1	1	3	2	1	1	1	2	1	1	1	2	2	2	2	2	5	0	1	1	2	1	2	2	28
2014	2	1	1	1	1	1	0	1	0	1	0	2	2	2	1	2	2	1	1	1	2	3	5	2	2	34
2014	2	1	2	1	2	1	0	1	1	2	1	1	1	2	2	2	1	1	1	1	1	2	1	2	2	30
2014	2	1	1	1	2	1	0	1	0	1	0	2	1	2	2	2	1	1	1	1	1	2	1	1	1	0
2014	1	2	1	1	2	1	1	1	1	1	1	1	2	2	2	2	2	5	0	1	1	2	1	2	2	26
2014	1	1	2	1	4	2	1	1	0	1	0	1	1	1	2	2	2	2	2	1	1	1	2	2	2	28
2014	2	3	2	1	4	2	0	1	0	1	0	1	1	1	2	1	2	3	3	2	2	1	3	2	2	31
2014	1	2	1	1	1	1	0	1	2	1	1	2	2	2	1	2	2	1	1	1	1	2	1	2	2	33
2014	1	2	1	3	2	1	0	1	0	1	0	2	2	2	2	2	2	5	0	2	2	2	4	2	2	30
2014	2	1	2	1	2	1	3	2	1	1	1	1	2	1	2	2	2	1	1	2	2	2	4	1	1	2
2014	2	2	2	1	2	1	1	1	0	1	0	2	2	1	2	2	2	1	1	1	2	2	1	1	1	1
2014	2	1	1	1	3	2	0	1	0	1	0	1	1	1	1	2	2	3	3	1	1	2	1	1	1	16
2014	1	2	2	1	2	1	1	1	0	2	0	2	1	2	2	2	1	1	1	1	1	2	1	1	1	16
2014	2	2	2	2	4	2	0	1	0	1	0	2	1	2	1	2	2	2	2	2	2	2	4	1	1	0
2014	1	2	1	2	1	1	0	1	0	1	0	1	1	1	2	2	2	2	2	1	1	2	1	2	2	24
2014	2	2	2	1	4	2	1	1	0	1	0	2	2	2	1	2	2	1	1	2	2	1	3	1	1	8
2014	2	1	2	1	4	2	1	1	0	1	0	2	2	2	1	2	2	1	1	1	1	2	1	1	1	6
2014	2	1	1	1	3	2	0	1	0	1	0	2	2	2	2	2	2	5	0	1	1	2	1	2	2	27
2014	2	2	2	1	4	2	3	2	0	1	0	1	2	2	1	2	2	1	1	2	2	2	4	1	1	4
2014	1	2	2	1	3	2	3	2	0	1	0	1	2	1	2	2	2	1	1	2	2	2	4	1	1	15
2014	2	2	1	1	4	2	1	1	0	1	0	2	1	2	1	2	2	2	2	1	1	2	1	2	2	24
2014	2	1	1	1	4	2	0	1	0	1	0	2	1	2	2	2	1	1	1	1	1	2	1	1	1	23
2014	2	1	1	2	4	2	1	1	0	1	0	2	1	2	2	1	2	2	2	1	1	2	1	1	1	5
2014	2	1	2	1	4	2	0	1	0	1	0	1	1	1	2	2	2	2	2	1	2	1	2	1	1	0
2014	2	1	2	3	4	2	1	1	0	1	0	1	1	1	2	2	2	2	2	1	2	1	2	1	1	5
2014	2	1	2	1	4	2	3	2	0	1	0	1	1	2	1	1	2	3	3	2	2	2	4	1	1	10
2014	2	1	1	1	2	1	1	1	1	1	1	1	1	1	2	2	2	2	2	1	1	2	1	1	1	22
2015	2	1	1	2	1	1	1	1	0	1	0	2	1	2	2	2	1	1	1	1	1	2	1	2	2	23
2015	2	1	2	1	4	2	1	1	2	2	1	1	2	1	1	2	2	2	2	1	2	1	2	2	2	21
2015	2	1	1	2	4	2	1	1	0	1	0	1	1	1	2	2	2	2	2	1	2	2	1	2	2	22
2015	1	1	2	3	2	1	3	2	2	1	1	1	2	2	1	2	2	1	1	2	2	1	3	2	2	22
2015	2	1	2	1	2	1	3	2	1	2	1	1	2	2	2	2	2	5	0	2	2	1	3	2	2	23
2015	2	1	2	1	3	2	0	1	0	1	0	2	1	2	2	2	1	1	1	2	2	2	4	1	1	0
2015	1	2	2	1	2	1	0	1	0	1	0	1	1	1	1	2	2	3	3	2	1	1	2	2	2	21
2015	2	1	2	1	2	1	0	1	0	1	0	1	2	2	1	2	2	1	1	2	2	1	3	2	2	21
2014	2	1	1	3	2	1	3	2	0	1	0	2	1	2	2	2	1	1	1	1	1	3	5	1	1	0
2014	2	2	1	3	2	1	0	1	0	1	0	2	1	2	2	2	1	1	1	2	2	2	4	2	2	24
2014	2	2	2	1	1	1	2	2	0	1	0	1	1	2	2	1	2	2	2	2	1	2	1	1	1	10
2015	2	1	1	3	4	2	1	1	0	1	0	2	1	1	1	2	2	3	3	1	2	2	1	1	1	0
2015	2	1	1	1	2	1	1	1	0	2	0	2	1	2	2	2	1	1	1	1	1	2	1	1	1	16
2015	2	1	1	2	2	1	3	2	2	1	1	2	2	1	2	2	2	1	1	1	1	2	1	2	2	21
2015	2	1	1	1	2	1	1	1	0	1	0	1	1	2	2	2	1	1	1	2	2	1	3	1	1	20
2015	2	2	1	3	1	1	1	1	1	2	1	1	1	2	2	2	1	1	1	1	1	2	1	2	2	20
2015	2	2	2	1	4	2	1	1	0	1	0	2	1	2	1	1	2	3	3	2	2	2	4	1	1	0
2013	2	1	1	3	2	1	0	1	0	1	0	2	2	2	2	2	2	5	0	3	3	3	5	2	1	15
2015	2	2	1	1	4	2	2	2	0	1	0	2	2	2	1	2	2	1	1	1	1	2	1	2	1	9
2015	2	2	1	3	2	1	1	1	0	1	0	2	1	2	2	2	1	1	1	1	1	2	1	2	2	20
2015	2	1	1	1	4	2	1	1	0	1	0	1	2	2	1	2	2	1	1	1	1	2	1	1	1	14
2015	1	1	2	1	2	1	3	2	2	2	1	2	1	2	2	2	1	1	1	1	1	2	1	2	2	22
2013	2	1	2	1	4	2	1	1	0	1	0	1	1	2	2	2	1	1	1	2	2	1	3	2	2	39
2014	2	2	2	1	4	2	1	1	0	1	0	1	1	1	1	2	2	3	3	1	2	1	2	1	1	5
2015	2	2	2	1	4	2	1	1	2	1	1	1	2	2	1	2	2	1	1	1	2	1	2	2	2	21
2015	2	1	1	3	2	1	0	1	0	1	0	2	1	1	2	2	2	2	2	3	3	3	5	1	1	0
2013	2	1	1	3	2	1	1	1	0	1	0	1	2	2	1	2	2	1	1	1	1	2	1	2	2	37
2013	1	1	2	1	4	2	3	2	0	1	0	2	1	1	2	2	2	2	2	2	2	2	4	1	1	2
2014	2	2	1	1	4	2	2	2	0	1	0	2	2	2	1	2	2	1	1	1	1	2	1	2	2	28
2014	2	1	2	1	4	2	1	1	0	2	0	1	1	1	1	2	2	3	3	1	1	2	1	1	1	6
2015	2	1	2	1	4	2	2	2	2	2	1	1	1	2	2	2	1	1	1	2	2	2	4	1	1	17
2014	2	2	2	3	4	2	1	1	0	1	0	2	2	1	1	2	2	2	2	1	2	1	2	1	1	1
2015	2	1	2	1	4	2	1	1	0	1	0	1	1	2	1	2	2	2	2	1	1	1	2	2	2	20
2015	2	2	2	1	4	2	1	1	0	1	0	2	2	2	1	2	2	1	1	1	2	1	2	2	2	21
2015	1	1	2	1	3	2	1	1	0	1	0	1	1	1	2	2	2	2	2	2	2	1	3	2	2	17
2015	2	1	1	1	4	2	3	2	0	1	0	1	1	2	2	2	1	1	1	2	2	2	4	1	1	11
2015	2	1	2	1	2	1	0	1	0	1	0	2	2	2	1	2	2	1	1	2	2	1	3	1	1	1
2014	2	1	1	1	2	1	3	2	1	2	1	2	2	2	2	2	2	5	0	1	1	2	1	2	2	28
2015	2	1	1	1	2	1	1	1	0	2	0	2	1	2	1	1	2	3	3	1	1	2	1	1	1	1
2015	1	1	1	1	2	1	2	2	0	1	0	1	1	1	2	2	2	2	2	1	1	2	1	1	1	10
2015	2	1	2	1	2	1	3	2	2	2	1	1	2	2	2	2	2	5	0	2	2	2	4	2	2	16
2015	1	1	2	1	4	2	1	1	0	2	0	1	1	2	2	2	1	1	1	1	1	1	2	2	2	19
2014	2	2	1	1	1	1	0	1	0	2	0	2	1	2	2	2	1	1	1	1	1	2	1	2	2	29
2015	2	1	1	2	2	1	0	1	0	1	0	2	2	2	2	1	2	1	1	1	1	2	1	2	1	8
2014	1	1	1	1	2	1	1	1	0	1	0	2	1	2	2	2	1	1	1	1	1	2	1	2	2	25
2015	2	1	2	1	4	2	1	1	2	1	1	1	1	1	2	2	2	2	2	1	1	2	1	1	1	9
2015	2	2	1	1	2	1	2	2	0	1	0	2	1	2	1	2	2	2	2	1	1	3	5	2	2	16
2015	2	1	1	2	2	1	0	1	0	1	0	2	1	2	2	2	1	1	1	1	1	2	1	2	1	4
2014	2	2	2	1	3	2	2	2	0	1	0	2	2	1	1	2	2	2	2	2	2	1	3	1	1	0
2014	1	1	1	1	2	1	0	1	0	1	0	1	1	1	1	1	2	4	4	1	1	2	1	1	1	3
2014	2	1	1	1	4	2	0	1	0	1	0	2	1	2	1	2	2	2	2	1	1	2	1	1	1	14
2015	1	1	2	3	2	1	1	1	0	1	0	2	1	2	1	2	2	2	2	2	2	2	4	1	1	3
2015	2	1	1	1	2	1	0	1	0	1	0	1	1	1	2	2	2	2	2	2	2	2	4	2	2	17
2015	1	1	2	1	4	2	3	2	2	2	1	1	2	2	1	2	2	1	1	2	2	2	4	2	2	22
2015	2	2	2	1	3	2	1	1	1	1	1	1	1	2	2	2	1	1	1	2	2	1	3	2	2	17
2015	2	1	2	1	3	2	1	1	0	1	0	1	2	1	2	2	2	1	1	2	2	2	4	1	1	14
2015	2	2	2	1	4	2	3	2	0	1	0	1	2	2	2	2	2	5	0	2	2	1	3	1	1	8
2015	2	2	2	1	2	1	1	1	0	1	0	1	1	2	2	2	1	1	1	2	2	2	4	1	1	7
2014	2	2	1	1	4	2	1	1	0	1	0	2	1	2	2	2	1	1	1	1	1	2	1	2	2	25
2015	1	3	2	1	4	2	2	2	0	1	0	1	1	2	1	2	2	2	2	1	1	1	2	2	2	15
2015	2	1	1	1	2	1	1	1	0	1	0	2	1	2	2	2	1	1	1	1	1	2	1	1	1	4
2015	2	1	2	1	1	1	1	1	0	1	0	1	1	2	2	2	1	1	1	1	1	1	2	2	2	14
2015	2	1	2	1	3	2	3	2	0	2	0	1	1	1	1	2	2	3	3	2	2	2	4	1	1	12
2015	1	2	2	1	3	2	1	1	0	1	0	2	2	1	2	2	2	1	1	2	2	2	4	1	1	2
2015	2	2	2	1	1	1	1	1	1	1	1	1	2	2	2	2	2	5	0	1	2	2	1	2	2	15
2015	2	1	1	1	4	2	2	2	2	2	1	1	2	2	2	2	2	5	0	2	2	1	3	2	2	16
2015	2	1	2	1	3	2	1	1	0	1	0	1	1	1	1	2	2	3	3	2	2	2	4	2	2	15
2015	2	1	1	1	2	1	0	1	0	1	0	2	1	2	2	2	1	1	1	1	1	2	1	2	2	22
2015	2	2	1	1	1	1	0	1	0	1	0	1	2	2	1	2	2	1	1	1	1	2	1	2	2	13
2015	1	2	1	1	2	1	0	1	0	1	0	2	1	2	2	2	1	1	1	1	1	2	1	2	2	19
2015	1	1	2	1	4	2	1	1	0	1	0	2	2	1	1	2	2	2	2	2	2	2	4	1	1	0
2015	2	1	2	1	2	1	2	2	0	1	0	1	1	2	2	2	1	1	1	2	2	2	4	1	1	8
2015	2	1	1	1	2	1	1	1	0	1	0	1	2	2	2	2	2	5	0	1	1	2	1	2	2	19
2015	2	2	1	1	2	1	2	2	0	1	0	1	2	1	2	2	2	1	1	1	2	1	2	2	2	20
2015	2	2	1	1	1	1	0	1	0	1	0	1	1	2	2	2	1	1	1	1	1	3	5	2	2	18
2015	2	2	2	3	4	2	1	1	2	2	1	1	2	2	1	2	2	1	1	2	2	1	3	2	2	14
2015	2	2	3	2	4	2	1	1	2	2	1	1	1	2	2	2	1	1	1	1	1	2	1	2	2	15
2015	2	1	2	1	2	1	0	1	0	1	0	1	1	1	1	1	2	4	4	2	2	1	3	1	1	2
2015	2	1	1	2	2	1	1	1	0	1	0	2	1	2	2	2	1	1	1	1	1	2	1	1	1	14
2015	2	1	1	2	1	1	0	1	0	1	0	1	1	2	2	2	1	1	1	1	1	2	1	2	2	17
2015	2	1	2	1	2	1	2	2	0	1	0	1	2	2	1	2	2	1	1	1	1	2	1	2	2	22
2015	2	1	2	1	2	1	0	1	0	1	0	1	1	2	1	2	2	2	2	1	2	1	2	2	2	18
2015	2	2	1	1	4	2	1	1	0	1	0	1	1	1	2	2	2	2	2	1	1	2	1	2	2	14
2015	2	2	1	1	4	2	0	1	0	1	0	2	2	2	1	2	2	1	1	1	2	2	1	2	1	2
2012	2	1	1	3	2	1	3	2	0	1	0	2	3	3	3	3	2	5	5	3	3	3	5	1	1	46
2015	2	2	2	1	2	1	1	1	2	2	1	1	1	2	2	2	1	1	1	1	2	1	2	2	2	16
2015	2	1	1	3	1	1	2	2	1	2	1	2	1	2	2	2	1	1	1	1	2	2	1	2	2	13
2015	2	1	2	1	2	1	1	1	0	2	0	2	1	2	2	1	2	2	2	1	1	2	1	2	2	18
2015	1	3	2	3	2	1	1	1	1	2	1	1	2	2	1	2	2	1	1	2	2	1	3	2	2	15
2015	2	2	1	1	2	1	0	1	2	1	1	1	2	2	1	2	2	1	1	1	2	2	1	2	2	14
2015	2	1	1	1	2	1	1	1	0	1	0	1	2	2	2	2	2	5	0	1	1	2	1	2	2	14
2015	2	2	2	1	1	1	1	1	1	1	1	1	2	2	2	2	2	5	0	2	2	2	4	2	2	13
2015	2	2	2	3	4	2	1	1	0	1	0	2	1	2	3	2	2	5	5	1	1	2	1	2	2	18
2015	2	1	2	1	4	2	3	2	0	1	0	2	1	2	1	2	2	2	2	1	1	2	1	2	2	14
2015	2	2	2	1	2	1	0	1	0	1	0	1	1	1	2	2	2	2	2	2	2	2	4	2	2	17
2015	2	1	1	2	1	1	1	1	0	1	0	2	2	2	2	2	2	5	0	1	2	2	1	2	2	17
2015	2	1	1	2	3	2	2	2	2	2	1	2	1	2	2	2	1	1	1	1	1	2	1	2	2	14
2015	2	2	1	3	4	2	0	1	0	1	0	2	2	2	1	2	2	1	1	3	3	3	5	1	1	1
2015	2	1	1	2	1	1	0	1	0	1	0	2	1	2	2	2	1	1	1	1	1	2	1	2	2	17
2015	2	2	2	1	4	2	0	1	0	1	0	2	1	1	2	2	2	2	2	2	2	1	3	1	1	8
2015	2	1	2	3	2	1	0	1	0	1	0	1	1	2	2	2	1	1	1	2	2	1	3	2	2	16
2015	1	3	1	1	4	2	2	2	2	2	1	1	1	2	2	2	1	1	1	1	1	2	1	2	2	18
2015	2	2	1	3	4	2	1	1	0	1	0	1	1	2	1	1	2	3	3	2	2	1	3	1	1	18
2015	2	1	2	1	2	1	0	1	0	1	0	2	1	2	2	2	1	1	1	1	1	2	1	2	2	23
2015	2	1	1	3	2	1	0	1	0	2	0	2	1	1	1	2	2	3	3	1	1	3	5	1	1	1
2015	2	1	2	3	4	2	0	1	0	1	0	1	2	2	2	2	2	5	0	3	3	3	5	1	1	2
2015	2	1	1	2	1	1	0	1	0	1	0	1	1	2	2	2	1	1	1	1	2	1	2	1	1	3
2015	2	1	1	2	4	2	1	1	1	1	1	1	2	2	2	2	2	5	0	1	2	2	1	2	2	12
2015	1	1	3	2	3	2	3	2	2	2	1	1	1	2	2	2	1	1	1	1	2	3	5	2	2	13
2015	2	2	1	1	2	1	3	2	0	2	0	2	1	1	2	2	2	2	2	1	1	2	1	2	2	13
2012	1	1	1	3	2	1	1	1	0	1	0	1	1	1	2	2	2	2	2	1	1	1	2	1	1	29
2015	1	1	1	2	2	1	3	2	2	1	1	1	1	2	2	2	1	1	1	1	1	1	2	2	2	17
2015	2	1	2	1	3	2	1	1	0	1	0	2	1	2	2	2	1	1	1	1	1	1	2	2	2	12
2015	2	2	1	1	4	2	0	1	0	1	0	2	1	2	1	2	2	2	2	1	1	2	1	1	1	0
2015	2	2	1	3	1	1	1	1	0	1	0	1	2	2	2	2	2	5	0	1	1	2	1	2	2	18
2015	2	1	3	1	4	2	3	2	2	2	1	1	2	2	2	2	2	5	0	1	1	2	1	2	2	16
2015	2	2	1	1	4	2	3	2	0	1	0	2	1	2	1	1	2	3	3	1	1	1	2	1	1	3
2015	2	1	2	1	4	2	3	2	0	1	0	2	1	1	1	1	2	4	4	1	1	1	2	2	2	16
2015	2	1	1	3	2	1	0	1	0	1	0	2	1	1	2	2	2	2	2	1	1	1	2	1	1	14
2015	2	1	2	1	4	2	0	1	2	2	1	1	1	2	2	2	1	1	1	2	2	1	3	2	2	17
2015	2	2	2	1	2	1	1	1	0	1	0	2	1	2	1	1	2	3	3	2	2	2	4	1	1	1
2015	2	1	1	1	2	1	0	1	0	2	0	2	1	1	2	1	2	3	3	1	2	2	1	2	2	12
2015	2	2	1	3	2	1	1	1	0	1	0	1	1	1	2	2	2	2	2	2	2	2	4	2	2	12
2015	2	1	2	1	3	2	1	1	0	1	0	2	1	1	1	2	2	3	3	2	2	1	3	1	1	1
2015	2	1	2	3	2	1	1	1	0	1	0	1	2	1	1	2	2	2	2	2	2	2	4	1	1	9
2015	2	2	1	3	2	1	0	1	0	1	0	2	2	2	3	1	2	5	5	3	3	3	5	2	2	23
2015	2	1	2	1	4	2	1	1	0	1	0	1	1	1	1	1	2	4	4	3	3	3	5	1	1	2
2015	2	1	1	1	2	1	0	1	0	1	0	2	2	2	1	2	2	1	1	1	1	2	1	2	2	13
2015	2	1	1	1	1	1	0	1	0	1	0	2	1	2	2	2	1	1	1	1	2	1	2	2	2	14
2015	2	2	2	1	4	2	1	1	0	1	0	1	1	2	2	2	1	1	1	2	2	2	4	1	1	4
2015	2	2	1	1	2	1	0	1	1	1	1	1	1	2	2	2	1	1	1	1	1	2	1	1	1	15
2015	2	1	1	1	2	1	1	1	0	1	0	1	1	2	2	2	1	1	1	1	1	1	2	2	2	22
2015	2	1	1	1	1	1	0	1	0	1	0	1	1	2	2	2	1	1	1	1	1	1	2	2	2	14
2015	2	1	1	3	2	1	0	1	0	1	0	2	3	3	3	3	2	5	5	3	3	3	5	1	1	2
2014	2	1	1	3	2	1	0	1	0	1	0	2	1	2	2	2	1	1	1	1	1	2	1	1	1	24
2011	2	3	2	1	4	2	3	2	2	1	1	2	1	2	2	2	1	1	1	1	1	2	1	2	1	0
2014	2	1	1	1	2	1	1	1	1	2	1	1	1	2	2	2	1	1	1	1	1	2	1	2	2	28
2013	2	1	1	1	2	1	1	1	0	1	0	2	1	2	1	2	2	2	2	1	1	2	1	1	1	3
2010	2	3	1	1	4	2	2	2	0	1	0	1	1	2	2	1	2	2	2	1	1	1	2	1	1	21
2011	2	1	2	1	2	1	2	2	0	1	0	2	1	2	2	2	1	1	1	1	1	2	1	1	1	1
2010	1	3	2	1	2	1	3	2	0	1	0	1	1	2	2	2	1	1	1	2	2	2	4	1	1	29
2010	2	3	2	1	2	1	3	2	2	1	1	1	2	2	2	2	2	5	0	2	2	1	3	2	2	74
2010	2	3	1	1	4	2	1	1	0	1	0	2	1	2	2	2	1	1	1	1	1	2	1	1	1	2
2010	2	3	2	1	3	2	2	2	2	2	1	2	1	1	2	2	2	2	2	1	2	2	1	1	1	11
2010	2	3	1	1	2	1	0	1	0	1	0	2	1	1	2	2	2	2	2	1	1	2	1	1	1	3
2010	2	3	1	1	4	2	3	2	0	1	0	2	1	1	2	2	2	2	2	1	1	2	1	1	1	5
2010	1	3	2	1	3	2	1	1	0	1	0	2	1	2	2	2	1	1	1	1	1	2	1	1	1	33
2010	1	3	1	3	2	1	0	1	0	1	0	2	1	3	2	3	2	5	5	3	3	2	5	1	1	20
2010	1	3	1	1	4	2	3	2	0	1	0	2	1	2	2	2	1	1	1	1	1	1	2	1	1	18
2010	2	3	1	1	4	2	0	1	0	1	0	1	1	2	2	2	1	1	1	1	1	2	1	1	1	43
2010	2	3	2	1	2	1	1	1	2	1	1	1	2	2	2	2	2	5	0	1	1	2	1	2	2	81
2010	2	1	2	1	4	2	1	1	0	1	0	2	1	2	2	1	2	2	2	1	1	1	2	1	1	36
2010	1	3	1	1	1	1	1	1	0	2	0	2	1	2	1	2	2	2	2	1	1	2	1	2	2	73
2010	2	1	2	1	4	2	2	2	0	2	0	1	1	2	2	2	1	1	1	1	1	2	1	2	1	17
2010	1	3	2	1	4	2	1	1	0	1	0	1	1	1	2	2	2	2	2	1	1	2	1	1	1	22
2010	2	1	2	1	2	1	0	1	0	1	0	2	1	1	1	3	2	5	5	2	2	1	3	1	1	1
2010	2	1	1	3	2	1	0	1	0	1	0	2	3	1	2	2	2	5	5	3	3	3	5	2	2	0
2010	2	3	2	1	4	2	1	1	2	1	1	1	1	2	1	3	2	5	5	1	1	2	1	2	2	73
2010	2	1	1	2	2	1	3	2	2	2	1	1	2	1	2	2	2	1	1	1	1	2	1	1	1	56
2010	2	3	1	1	2	1	0	1	0	1	0	2	1	2	2	1	2	2	2	1	1	2	1	1	1	1
2010	1	3	1	3	2	1	0	1	0	1	0	1	1	2	2	2	1	1	1	1	1	2	1	1	1	51
2010	2	1	1	3	2	1	2	2	0	1	0	1	3	1	3	3	2	5	5	2	2	2	4	1	1	17
2010	2	1	1	1	2	1	0	1	0	1	0	2	1	2	1	2	2	2	2	1	1	2	1	1	1	0
2010	2	3	1	3	3	2	2	2	0	1	0	2	1	2	2	1	2	2	2	1	1	2	1	1	1	29
2010	2	3	1	2	2	1	0	1	0	1	0	2	3	3	3	3	2	5	5	1	2	2	1	1	1	4
2010	1	2	2	1	3	2	2	2	0	1	0	1	1	1	2	2	2	2	2	2	2	2	4	1	1	12
2010	2	3	2	1	4	2	1	1	2	1	1	2	2	2	1	2	2	1	1	2	2	2	4	1	1	20
2010	1	3	2	3	4	2	1	1	2	2	1	1	1	1	1	2	2	3	3	1	1	1	2	2	2	78
2011	2	1	1	3	4	2	3	2	0	1	0	2	3	3	3	3	2	5	5	1	1	1	2	1	1	10
2011	2	3	1	1	1	1	0	1	0	1	0	2	2	2	1	2	2	1	1	2	2	2	4	1	1	22
2011	2	3	2	1	2	1	1	1	1	2	1	1	1	1	1	1	2	4	4	2	2	2	4	2	2	29
2011	2	3	2	1	3	2	3	2	0	1	0	2	1	2	2	2	1	1	1	1	1	1	2	1	1	26
2011	2	1	2	1	4	2	2	2	1	2	1	2	1	1	1	3	2	5	5	2	2	1	3	1	1	22
2011	1	1	2	1	2	1	3	2	1	2	1	1	2	2	1	2	2	1	1	2	2	2	4	1	1	15
2011	2	3	2	1	2	1	1	1	0	1	0	1	1	1	2	2	2	2	2	2	2	2	4	1	1	4
2010	2	2	1	3	2	1	1	1	0	1	0	2	1	2	1	2	2	2	2	3	3	3	5	1	1	11
2011	2	3	1	2	2	1	0	1	0	1	0	2	1	2	2	2	1	1	1	1	1	1	2	1	1	0
2011	2	3	2	1	3	2	1	1	0	1	0	1	2	1	2	2	2	1	1	1	1	2	1	1	1	5
2012	2	1	2	1	4	2	1	1	0	1	0	2	2	2	2	2	2	5	0	1	1	2	1	1	1	20
2012	2	3	1	1	2	1	0	1	0	1	0	2	3	1	3	3	2	5	5	2	2	1	3	1	1	14
2011	2	3	1	2	1	1	2	2	0	1	0	2	1	2	2	2	1	1	1	1	1	2	1	1	1	23
2011	2	3	1	2	2	1	2	2	2	2	1	1	1	2	2	2	1	1	1	1	1	2	1	1	1	23
2011	2	3	1	3	4	2	0	1	0	1	0	1	1	2	1	2	2	2	2	1	1	2	1	1	1	21
2011	2	3	1	2	4	2	1	1	0	1	0	2	1	2	2	2	1	1	1	1	1	2	1	1	1	11
2011	2	3	2	1	4	2	0	1	0	1	0	1	1	2	1	1	2	3	3	1	1	1	2	2	2	63
2011	1	3	1	1	1	1	1	1	2	2	1	1	1	2	2	2	1	1	1	1	1	2	1	2	2	71
2011	2	3	2	1	3	2	2	2	2	1	1	1	2	2	1	2	2	1	1	1	2	1	2	2	2	68
2011	1	3	1	1	4	2	0	1	0	1	0	2	1	2	2	2	1	1	1	1	1	2	1	2	2	63
2011	2	1	1	1	2	1	1	1	0	1	0	2	1	2	2	2	1	1	1	1	1	2	1	1	1	49
2012	2	3	2	1	1	1	1	1	1	1	1	2	1	3	3	3	2	5	5	1	1	2	1	1	1	14
2011	2	1	2	1	4	2	3	2	1	2	1	1	2	2	2	2	2	5	0	1	2	2	1	1	1	28
2011	2	1	2	1	4	2	1	1	2	1	1	1	2	1	2	2	2	1	1	1	2	1	2	1	1	1
2011	2	3	3	2	1	1	2	2	2	2	1	2	3	3	3	3	2	5	5	1	1	2	1	2	2	58
2012	1	3	1	1	2	1	3	2	0	2	0	1	2	2	1	2	2	1	1	2	2	2	4	2	2	59
2012	2	3	1	1	2	1	0	1	0	1	0	2	2	1	2	2	2	1	1	1	2	2	1	1	1	1
2012	2	1	1	1	1	1	0	1	1	1	1	2	3	3	3	3	2	5	5	1	1	2	1	1	1	35
2012	2	3	2	1	4	2	1	1	2	1	1	1	1	1	1	3	2	5	5	1	1	1	2	2	2	8
2012	1	3	1	1	2	1	1	1	0	1	0	1	1	2	2	2	1	1	1	1	1	2	1	1	1	42
2012	1	3	2	1	4	2	1	1	0	1	0	1	1	1	1	2	2	3	3	1	2	1	2	1	1	27
2012	1	3	2	3	2	1	1	1	0	1	0	1	1	1	1	2	2	3	3	1	1	2	1	1	1	0
2012	2	3	1	1	4	2	2	2	0	1	0	1	1	1	1	1	2	4	4	1	1	1	2	1	1	2
2012	2	3	1	1	4	2	0	1	0	1	0	2	1	2	1	1	2	3	3	1	2	1	2	1	1	1
2012	2	2	1	2	2	1	0	1	0	1	0	1	1	2	2	2	1	1	1	1	1	2	1	2	2	59
2012	2	1	1	1	2	1	3	2	2	1	1	2	1	2	2	2	1	1	1	1	2	2	1	1	1	46
2012	2	1	1	2	2	1	2	2	1	1	1	2	1	2	2	2	1	1	1	1	1	2	1	1	1	20
2013	2	3	2	1	2	1	0	1	1	1	1	1	2	1	2	2	2	1	1	2	2	1	3	1	1	5
2012	2	3	1	3	4	2	0	1	0	1	0	2	2	2	1	2	2	1	1	1	3	3	5	1	1	2
2012	2	3	1	3	3	2	1	1	2	1	1	1	2	1	2	2	2	1	1	1	2	2	1	1	1	7
2012	1	3	1	1	2	1	0	1	1	2	1	1	1	2	2	2	1	1	1	1	1	2	1	2	2	50
2012	2	3	2	1	4	2	3	2	2	2	1	1	2	2	2	2	2	5	0	2	2	1	3	2	2	59
2012	2	3	2	1	4	2	2	2	2	1	1	1	1	2	2	2	1	1	1	2	2	1	3	2	2	53
2013	2	3	2	1	2	1	0	1	0	1	0	2	1	2	1	2	2	2	2	1	1	2	1	2	2	5
2012	2	3	2	1	4	2	0	1	0	1	0	1	1	1	2	1	2	3	3	1	1	2	1	1	1	20
2012	1	3	1	1	2	1	1	1	2	1	1	2	1	2	2	2	1	1	1	1	1	2	1	2	2	50
2012	2	3	2	3	4	2	1	1	2	2	1	1	2	1	2	2	2	1	1	1	1	2	1	1	1	20
2012	2	3	1	1	4	2	3	2	0	1	0	1	2	2	1	2	2	1	1	1	2	2	1	1	1	12
2013	2	3	1	1	3	2	1	1	0	1	0	2	1	2	2	2	1	1	1	1	1	2	1	2	2	42
2012	2	3	1	1	3	2	1	1	0	1	0	1	1	2	2	2	1	1	1	1	1	2	1	2	2	53
2012	1	3	1	1	2	1	1	1	0	1	0	2	1	2	2	2	1	1	1	1	1	2	1	2	2	58
2013	1	1	3	1	1	1	2	2	2	2	1	1	2	1	2	2	2	1	1	1	1	1	2	2	2	44
2013	1	1	1	1	1	1	0	1	0	1	0	2	1	2	2	2	1	1	1	1	1	2	1	2	2	43
2012	2	1	1	1	4	2	3	2	0	1	0	1	1	2	1	2	2	2	2	1	1	1	2	1	1	23
2012	2	1	1	1	3	2	1	1	2	1	1	2	1	2	2	2	1	1	1	1	2	2	1	2	2	50
2012	2	3	2	2	3	2	3	2	2	2	1	1	1	2	2	2	1	1	1	1	1	2	1	2	2	49
2012	2	3	1	1	4	2	0	1	0	1	0	1	1	2	1	2	2	2	2	1	1	2	1	1	1	38
2012	2	3	1	1	4	2	3	2	2	2	1	2	2	2	2	2	2	5	0	1	1	2	1	2	2	51
2012	2	1	1	3	4	2	1	1	0	1	0	1	1	1	1	2	2	3	3	1	1	2	1	1	1	27
2013	2	3	1	1	3	2	0	1	0	1	0	2	1	1	2	2	2	2	2	1	1	2	1	2	2	34
2013	2	3	2	1	3	2	1	1	2	1	1	2	2	1	2	2	2	1	1	1	1	2	1	2	2	40
2013	2	3	1	1	2	1	1	1	0	1	0	1	2	2	1	2	2	1	1	2	2	1	3	1	1	12
2013	2	1	2	1	4	2	2	2	2	2	1	1	2	2	2	2	2	5	0	1	2	2	1	2	2	47
2013	2	2	1	1	4	2	3	2	0	1	0	2	1	1	1	2	2	3	3	1	1	2	1	1	1	28
2012	1	3	1	3	2	1	1	1	0	1	0	2	1	1	1	2	2	3	3	1	1	2	1	1	1	40
2013	2	3	1	1	2	1	0	1	0	1	0	2	1	1	2	2	2	2	2	1	1	2	1	2	2	36
2013	2	2	2	1	4	2	3	2	0	2	0	1	1	1	2	2	2	2	2	2	2	2	4	1	1	9
2013	2	3	1	3	4	2	1	1	0	1	0	2	3	2	1	2	2	5	5	1	1	2	1	1	1	1
2013	2	1	2	1	3	2	2	2	2	2	1	1	1	2	2	2	1	1	1	2	2	2	4	2	2	38
2013	2	3	2	1	2	1	3	2	2	1	1	2	1	2	2	2	1	1	1	1	1	2	1	2	2	42
2013	2	1	2	1	4	2	1	1	2	1	1	2	1	2	1	3	2	5	5	1	2	2	1	1	1	5
2013	1	3	1	3	4	2	0	1	0	1	0	2	1	2	1	3	2	5	5	3	3	3	5	1	1	0
2013	2	3	1	3	3	2	0	1	0	1	0	2	3	3	3	3	2	5	5	3	3	3	5	1	1	0
2013	2	3	1	1	4	2	0	1	0	1	0	2	1	2	1	2	2	2	2	1	1	2	1	1	1	19
2013	2	3	1	1	2	1	0	1	0	1	0	2	1	2	1	2	2	2	2	1	1	2	1	1	1	0
2013	2	1	1	1	2	1	0	1	0	1	0	2	1	2	1	3	2	5	5	1	1	2	1	1	1	0
2013	2	1	1	2	2	1	0	1	0	1	0	2	1	2	2	2	1	1	1	2	2	2	4	1	1	13
2014	2	3	2	1	4	2	1	1	2	1	1	1	1	2	1	2	2	2	2	2	2	2	4	1	1	2
2013	2	3	1	1	4	2	1	1	0	1	0	2	1	2	1	2	2	2	2	1	1	2	1	2	2	47
2014	2	1	1	2	3	2	3	2	1	1	1	2	2	2	1	2	2	1	1	1	2	2	1	2	2	31
2013	2	1	2	1	3	2	3	2	0	1	0	2	1	2	1	2	2	2	2	1	1	1	2	2	1	5
2014	2	3	2	1	3	2	0	1	0	1	0	1	2	1	1	2	2	2	2	2	2	2	4	1	1	0
2013	2	3	1	1	2	1	0	1	0	1	0	2	1	3	3	3	2	5	5	1	1	2	1	2	2	1
2014	2	1	2	1	1	1	1	1	2	1	1	2	3	1	3	3	2	5	5	2	2	2	4	1	1	6
2014	2	3	1	1	4	2	2	2	2	2	1	1	1	2	2	2	1	1	1	2	2	1	3	2	2	29
2013	2	1	1	1	1	1	1	1	0	1	0	2	1	2	2	2	1	1	1	1	2	2	1	1	1	7
2013	2	1	1	2	3	2	1	1	2	1	1	2	2	2	2	2	2	5	0	1	2	2	1	2	2	39
2013	2	3	1	3	2	1	0	1	0	1	0	1	3	3	3	3	2	5	5	1	1	2	1	2	2	39
2014	2	1	1	1	3	2	1	1	0	1	0	1	2	1	1	2	2	2	2	1	2	1	2	2	2	27
2013	2	1	1	2	4	2	1	1	0	1	0	2	1	1	1	2	2	3	3	1	1	2	1	2	1	23
2014	2	3	1	1	3	2	0	1	0	1	0	2	2	2	1	2	2	1	1	2	2	2	4	2	1	3
2014	2	3	2	1	2	1	0	1	0	1	0	2	3	3	3	3	2	5	5	1	1	2	1	1	1	10
2014	2	3	1	1	2	1	0	1	1	1	1	2	1	2	2	2	1	1	1	1	2	2	1	2	2	29
2014	2	3	1	1	2	1	0	1	0	1	0	2	2	1	2	2	2	1	1	1	1	2	1	2	1	2
2013	2	3	3	1	4	2	2	2	2	1	1	2	2	2	1	2	2	1	1	1	1	2	1	2	2	40
2014	2	3	2	3	2	1	1	1	0	1	0	2	3	2	1	1	2	5	5	1	1	2	1	1	1	0
2014	2	1	1	1	4	2	1	1	0	1	0	2	2	1	2	2	2	1	1	2	2	1	3	1	1	1
2014	2	1	1	1	4	2	2	2	0	1	0	1	1	1	2	2	2	2	2	1	1	2	1	1	1	7
2014	2	3	1	1	4	2	2	2	0	1	0	2	1	3	1	2	2	5	5	1	1	2	1	1	1	0
2014	2	3	1	1	3	2	1	1	2	1	1	1	2	2	1	2	2	1	1	1	1	1	2	2	2	31
2014	2	3	2	1	4	2	3	2	2	1	1	2	2	2	1	2	2	1	1	2	2	2	4	1	1	11
2014	2	1	1	1	1	1	0	1	2	1	1	2	2	2	2	2	2	5	0	1	1	2	1	2	2	34
2014	1	1	2	1	4	2	2	2	0	1	0	2	2	2	2	2	2	5	0	1	1	2	1	2	2	31
2014	2	3	1	1	2	1	1	1	0	1	0	1	2	1	2	2	2	1	1	1	1	2	1	2	2	4
2014	2	3	2	3	3	2	3	2	2	2	1	1	1	1	2	2	2	2	2	2	2	1	3	1	1	27
2014	2	3	1	2	2	1	0	1	0	1	0	2	1	2	2	2	1	1	1	1	2	2	1	1	1	25
2014	2	1	1	3	3	2	0	1	0	1	0	2	1	2	1	2	2	2	2	1	2	2	1	1	1	19
[truncated: 11,035 more rows]

## Sheet: After prospensity matching
Year of diagnosis	Age at diagnosis（1=20-49，2=50-79）	Race recode (1=White, 2=Black, 3=Other，4=Unknown)	Grade（1=Grade I and Grade II，2=Grade III and Grade IV，3=Unknown）	ICD-O-3 Hist/behav, malignant （1=IDC，2=ILC，3=Others）	Derived AJCC T, 7th ed (2010-2015)（1=T1 and T2,2=T3 and T4）	Derived AJCC N, 7th ed (2010-2015)(0=N0 and N1,1=N2 and N3)	RX Summ--Surg Prim Site (108+)(0=observation,1=BCS,2=Masctomy)	Radiation ( 1=no radiation/unknown 2=radiation)	surgery yes or no (0=no，1=yes)	Chemotherapy recode (1=Yes, 2=no/unknown)	bone (2010+)(1=Yes,2=No,3=Unknown and N/A)	liver (2010+)(1=Yes,2=No,3=Unknown and N/A)	lung (2010+)(1=Yes,2=No,3=Unknown and N/A)	brain (2010+)(1=Yes,2=No,3=Unknown and N/A)	bone metastasis only(1=yes,2=no)	number of metastasis in bone liver lung and brain(5=unknown and no metastasis in the four organs)	number of metastasis in the four organs(5=unknown,0=no metastasis in the four organs)	ER Status Recode Breast Cancer (1990+)(1=Positive,2=Negative,3=Unknown)	PR Status Recode Breast Cancer (1990+)(1=Positive,2=Negative,3=Unknown)	HER2 Recode (2010+)(1=Positive,2=Negative,3=Unknown)	Breast Subtype (2010+)(1=HR+/HER2- ,2=HR+/HER2+,3=HR-/HER2+,4=HR-/HER2- (Triple Negative),5=Unknown)	SEER cause-specific death classification（1=Dead (attributable to this cancer dx)，0=Alive or dead of other cause）	Vital status recode (study cutoff used)（1=Dead，0=Alive）	Survival months
2010	1	1	1	1	1	0	0	1	0	1	1	2	2	2	1	1	1	1	2	2	1	1	1	39
2010	2	1	2	1	2	0	1	2	1	2	1	2	2	2	1	1	1	1	1	2	1	1	1	10
2010	2	2	2	1	2	0	2	1	1	2	2	2	2	2	2	5	0	1	1	3	5	1	1	15
2010	2	1	3	2	1	0	0	1	0	2	2	1	2	2	2	1	1	1	1	2	1	1	1	11
2010	2	1	3	1	2	1	0	2	0	1	1	2	1	2	2	2	2	1	1	2	1	1	1	11
2010	2	1	2	1	1	0	1	2	1	1	1	2	2	2	1	1	1	1	1	1	2	0	0	81
2010	2	1	2	1	2	1	0	1	0	1	1	1	1	2	2	3	3	1	1	2	1	1	1	45
2010	2	1	1	1	1	0	1	1	1	2	2	2	1	2	2	1	1	1	1	2	1	1	1	74
2010	2	1	1	3	2	0	2	2	1	2	1	2	2	2	1	1	1	1	2	3	5	0	1	27
2010	2	1	1	3	1	0	0	1	0	2	2	2	2	2	2	5	0	1	1	3	5	1	1	0
2010	1	3	3	3	2	1	0	1	0	1	1	1	2	2	2	2	2	1	1	2	1	1	1	24
2010	2	1	1	1	1	0	2	2	1	2	1	2	1	2	2	2	2	1	1	2	1	1	1	54
2010	2	3	1	1	2	0	0	1	0	1	2	1	1	1	2	3	3	2	2	2	4	1	1	10
2010	2	3	1	1	2	1	0	1	0	2	1	2	2	2	1	1	1	1	1	2	1	1	1	23
2010	1	3	2	3	2	0	2	2	1	1	1	2	2	2	1	1	1	1	1	1	2	1	1	44
2010	1	1	2	1	2	1	1	1	1	1	1	2	2	2	1	1	1	2	2	1	3	0	0	83
2010	2	2	2	1	1	0	1	1	1	1	1	2	2	2	1	1	1	1	2	2	1	1	1	65
2010	2	1	3	1	2	1	0	1	0	2	2	2	1	2	2	1	1	1	1	2	1	1	1	42
2010	2	1	1	3	2	0	1	2	1	1	1	2	2	2	1	1	1	1	1	2	1	0	0	80
2010	1	2	1	1	2	1	2	1	1	1	2	2	1	2	2	1	1	3	3	1	5	1	1	24
2010	2	1	1	1	1	0	1	2	1	2	2	2	2	2	2	5	0	1	1	2	1	0	0	83
2010	2	3	1	1	1	1	0	1	0	2	1	2	1	2	2	2	2	1	1	2	1	0	0	0
2010	1	1	1	1	1	0	0	1	0	1	2	1	2	2	2	1	1	1	1	2	1	0	0	76
2010	2	2	2	1	2	0	0	1	0	1	1	2	1	2	2	2	2	2	2	2	4	1	1	18
2010	2	1	1	1	1	0	0	1	0	2	3	3	3	3	2	5	5	1	1	2	1	1	1	35
2010	2	1	2	1	1	0	0	1	0	2	2	1	1	2	2	2	2	1	2	1	2	1	1	2
2010	2	1	2	1	1	0	1	2	1	1	1	2	2	2	1	1	1	1	2	2	1	1	1	27
2010	2	1	1	2	1	0	2	2	1	1	2	2	2	2	2	5	0	1	1	2	1	0	0	73
2010	2	2	2	1	2	0	2	1	1	1	1	2	1	2	2	2	2	1	1	1	2	1	1	31
2010	2	2	2	1	1	0	0	1	0	1	2	1	1	2	2	2	2	1	2	2	1	1	1	15
2010	2	3	2	1	1	0	0	1	0	1	1	2	1	2	2	2	2	1	2	2	1	1	1	2
2010	2	1	1	2	1	1	2	1	1	2	1	2	2	2	1	1	1	1	1	2	1	0	0	82
2010	2	3	2	1	1	0	0	1	0	1	2	2	2	2	2	5	0	1	1	2	1	0	0	41
2010	2	2	2	1	1	1	1	1	1	2	1	1	1	2	2	3	3	1	1	2	1	1	1	56
2010	1	1	3	3	2	1	2	2	1	1	2	2	2	2	2	5	0	1	1	2	1	1	1	14
2010	1	1	2	1	1	0	2	1	1	1	2	1	1	2	2	2	2	1	1	2	1	1	1	28
2010	2	3	2	1	1	0	0	1	0	1	1	1	2	2	2	2	2	1	2	1	2	1	1	15
2011	2	2	2	3	2	0	0	1	0	1	1	2	2	2	1	1	1	2	1	2	1	0	1	4
2011	2	3	3	3	2	1	0	1	0	1	1	2	2	2	1	1	1	2	2	1	3	1	1	13
2011	1	4	1	1	1	1	0	1	0	1	2	1	2	2	2	1	1	1	3	2	5	1	1	1
2010	2	3	2	1	1	0	0	1	0	1	1	1	2	2	2	2	2	1	1	2	1	1	1	1
2010	2	2	2	1	1	0	0	1	0	1	2	1	1	2	2	2	2	1	2	2	1	0	1	33
2011	2	2	1	1	2	0	0	1	0	1	2	2	1	2	2	1	1	1	1	2	1	0	0	18
2011	2	2	1	1	1	0	1	2	1	2	1	2	2	2	1	1	1	1	1	3	5	0	1	52
2011	1	3	2	1	1	1	1	1	1	1	1	2	2	2	1	1	1	2	2	1	3	0	0	70
2011	2	2	2	3	1	1	0	2	0	2	1	2	2	2	1	1	1	1	1	2	1	1	1	62
2011	2	3	2	3	2	1	2	1	1	1	2	2	1	2	2	1	1	2	2	2	4	1	1	17
2011	2	1	1	2	2	1	2	2	1	2	1	2	2	2	1	1	1	1	1	2	1	1	1	51
2011	2	2	2	1	2	0	1	2	1	1	2	2	1	2	2	1	1	2	2	2	4	1	1	37
2011	2	1	1	3	1	0	1	2	1	2	1	2	2	2	1	1	1	1	1	2	1	0	0	69
2011	1	2	2	3	2	1	2	1	1	1	1	2	1	2	2	2	2	1	2	2	1	1	1	11
2011	2	2	2	1	1	0	0	1	0	2	1	2	1	2	2	2	2	1	1	2	1	1	1	47
2010	2	2	2	3	1	1	0	1	0	2	1	2	2	2	1	1	1	1	1	1	2	1	1	25
2011	2	3	2	3	2	1	0	1	0	1	1	1	1	2	2	3	3	2	2	1	3	1	1	2
2010	2	1	2	1	1	0	2	1	1	2	1	2	2	2	1	1	1	1	2	2	1	0	0	73
2011	2	3	2	1	2	1	0	1	0	1	1	2	2	2	1	1	1	1	2	2	1	1	1	6
2011	2	3	2	1	1	0	2	1	1	1	2	1	2	2	2	1	1	2	1	1	2	0	0	70
2010	2	1	1	1	1	1	1	2	1	2	1	2	1	2	2	2	2	1	2	2	1	0	0	81
2011	2	3	1	3	2	0	0	1	0	2	1	2	2	2	1	1	1	1	1	2	1	1	1	27
2010	1	1	1	1	2	0	1	1	1	1	1	1	2	2	2	2	2	1	1	2	1	0	0	73
2011	2	3	1	1	2	1	0	1	0	1	2	2	2	2	2	5	0	2	2	2	4	1	1	34
2011	1	3	2	1	1	1	2	1	1	1	1	2	2	2	1	1	1	1	1	2	1	1	1	26
2011	2	3	1	1	1	0	0	1	0	2	1	2	2	2	1	1	1	1	1	2	1	1	1	10
2011	2	2	2	1	1	0	1	1	1	2	2	1	2	2	2	1	1	1	1	2	1	0	0	65
2011	2	3	1	1	1	0	0	1	0	2	1	2	2	2	1	1	1	1	1	2	1	1	1	26
2011	2	1	1	1	1	0	1	2	1	2	1	2	1	2	2	2	2	1	1	2	1	1	1	44
2011	2	1	2	1	2	1	2	1	1	1	2	2	2	2	2	5	0	2	2	1	3	1	1	32
2011	2	3	2	1	2	0	0	1	0	2	1	2	2	2	1	1	1	1	1	2	1	1	1	53
2011	2	3	2	1	1	0	0	1	0	1	1	2	2	2	1	1	1	1	2	1	2	0	0	66
2011	2	3	1	1	1	0	0	1	0	2	1	2	2	1	2	2	2	1	1	2	1	0	1	8
2011	2	3	1	1	2	0	0	1	0	2	2	2	1	2	2	1	1	1	1	2	1	1	1	16
2011	1	2	2	1	1	0	2	2	1	1	1	2	2	2	1	1	1	1	1	2	1	0	0	66
2011	1	3	2	1	2	0	0	1	0	1	1	1	2	2	2	2	2	1	1	2	1	1	1	20
2011	1	1	1	1	1	0	2	1	1	1	1	2	2	2	1	1	1	1	1	2	1	0	0	70
2011	2	2	1	1	2	0	0	1	0	2	2	2	2	2	2	5	0	1	1	2	1	1	1	17
2011	2	1	2	1	2	1	2	1	1	1	1	1	2	2	2	2	2	2	2	1	3	1	1	45
2011	2	3	1	3	1	1	2	2	1	2	1	2	2	2	1	1	1	1	1	2	1	1	1	45
2012	2	3	2	3	1	1	0	1	0	2	2	1	2	2	2	1	1	1	1	2	1	1	1	31
2011	2	3	2	3	2	0	0	1	0	1	1	2	2	2	1	1	1	1	1	2	1	0	0	61
2011	2	1	3	1	1	1	2	1	1	1	1	2	1	2	2	2	2	1	1	2	1	0	0	60
2011	2	3	2	3	2	0	0	1	0	1	1	2	2	2	1	1	1	1	1	2	1	1	1	55
2011	2	3	2	1	1	0	1	2	1	2	1	1	2	2	2	2	2	1	1	1	2	1	1	28
2010	2	1	2	1	2	0	1	1	1	2	1	1	1	2	2	3	3	3	3	3	5	1	1	0
2012	2	2	1	2	1	0	0	1	0	2	1	2	2	2	1	1	1	1	1	2	1	0	0	59
2012	2	3	2	1	2	0	0	1	0	2	1	2	2	2	1	1	1	1	1	1	2	1	1	16
2011	2	1	1	1	2	0	2	1	1	1	1	2	2	2	1	1	1	1	1	2	1	1	1	39
2011	1	3	1	1	2	1	0	1	0	1	1	2	2	2	1	1	1	1	2	1	2	0	0	63
2012	2	1	1	2	2	1	2	1	1	2	1	2	2	2	1	1	1	1	2	2	1	1	1	44
2012	1	1	3	2	1	0	1	1	1	2	1	2	2	2	1	1	1	1	1	2	1	1	1	46
2012	2	3	1	1	1	0	0	1	0	2	1	2	2	2	1	1	1	1	2	1	2	1	1	22
2012	2	3	1	1	2	0	0	1	0	2	1	2	1	2	2	2	2	1	1	2	1	0	1	4
2011	1	3	2	3	1	0	2	1	1	1	2	1	2	2	2	1	1	1	2	2	1	1	1	33
2012	2	2	1	2	1	0	0	2	0	1	1	2	2	2	1	1	1	1	1	1	2	0	0	56
2012	2	3	1	1	1	1	0	1	0	1	1	1	2	2	2	2	2	1	2	1	2	0	0	59
2012	2	2	2	1	2	0	2	1	1	1	2	2	2	2	2	5	0	2	2	2	4	0	0	25
2012	1	3	1	1	1	0	0	1	0	1	1	2	2	2	1	1	1	1	1	2	1	1	1	43
2012	1	3	2	1	2	1	0	1	0	1	1	2	2	2	1	1	1	1	1	2	1	1	1	19
2012	2	3	2	1	1	0	0	1	0	1	1	2	1	2	2	2	2	1	1	2	1	1	1	43
2012	2	3	2	3	2	0	0	1	0	1	2	2	2	2	2	5	0	1	1	2	1	1	1	20
2012	2	1	2	3	2	1	2	1	1	2	2	2	1	2	2	1	1	2	1	2	1	1	1	6
2012	2	1	2	1	2	0	2	1	1	2	1	2	2	2	1	1	1	1	1	2	1	0	0	51
2012	2	3	2	1	2	0	0	1	0	1	2	2	1	1	2	2	2	2	2	2	4	1	1	0
2012	2	1	1	1	1	0	2	1	1	2	1	2	2	2	1	1	1	1	1	2	1	0	0	55
2011	1	3	2	1	1	0	0	1	0	2	1	2	2	2	1	1	1	1	2	2	1	1	1	39
2012	2	3	2	2	1	0	0	1	0	1	1	2	2	2	1	1	1	1	1	2	1	1	1	11
2012	2	3	1	1	1	1	0	1	0	1	1	1	1	2	2	3	3	1	1	2	1	1	1	38
2011	2	3	1	1	2	0	0	1	0	1	1	2	2	2	1	1	1	1	1	2	1	1	1	46
2012	2	3	2	1	2	0	0	1	0	1	2	1	1	2	2	2	2	2	2	2	4	1	1	8
2012	2	1	1	1	2	0	2	1	1	2	1	2	2	2	1	1	1	1	1	2	1	0	0	51
2012	2	3	1	1	2	1	0	1	0	2	1	2	2	1	2	2	2	1	1	2	1	1	1	1
2012	2	1	1	1	2	1	2	1	1	1	1	2	1	2	2	2	2	1	1	1	2	0	0	55
2012	2	3	1	1	2	1	2	1	1	1	1	2	2	2	1	1	1	2	2	1	3	0	0	46
2012	1	3	1	1	1	0	0	1	0	2	1	2	2	2	1	1	1	1	1	2	1	1	1	24
2012	2	1	3	1	2	0	2	2	1	1	1	2	1	2	2	2	2	2	2	2	4	1	1	4
2012	2	3	1	1	1	0	2	1	1	1	2	2	2	2	2	5	0	2	2	1	3	0	0	51
2012	2	1	1	2	2	0	2	1	1	1	1	2	2	2	1	1	1	1	1	2	1	0	0	50
2012	2	3	1	3	2	0	0	1	0	2	2	2	1	2	2	1	1	1	1	2	1	0	0	51
2012	2	1	2	1	2	0	2	1	1	1	1	2	1	2	2	2	2	1	2	2	1	1	1	41
2012	1	3	1	1	2	0	0	1	0	1	1	2	2	2	1	1	1	1	1	2	1	1	1	16
2012	2	2	1	1	2	0	0	1	0	2	1	1	1	2	2	3	3	1	1	2	1	1	1	11
2012	2	3	2	1	2	0	0	1	0	1	1	2	3	1	2	5	5	1	1	1	2	1	1	28
2012	2	1	2	3	2	0	2	1	1	1	2	2	1	2	2	1	1	1	2	2	1	1	1	14
2012	2	3	2	3	1	0	0	1	0	1	1	2	2	2	1	1	1	1	1	2	1	0	0	48
2012	2	1	2	2	2	1	2	1	1	2	1	1	2	2	2	2	2	1	2	2	1	0	0	53
2012	2	3	1	2	1	0	0	1	0	2	1	2	2	2	1	1	1	1	1	2	1	1	1	50
2012	2	1	1	1	1	0	1	2	1	2	2	2	1	2	2	1	1	1	1	2	1	0	0	54
2012	1	1	1	1	1	0	0	1	0	2	1	2	1	2	2	2	2	1	1	2	1	1	1	41
2012	2	1	1	1	1	0	0	1	0	1	1	2	2	2	1	1	1	2	2	2	4	1	1	9
2012	2	1	1	1	2	0	0	1	0	1	2	2	2	2	2	5	0	1	1	1	2	0	1	26
2012	2	1	1	2	1	1	0	1	0	2	2	1	2	2	2	1	1	1	1	1	2	1	1	49
2013	2	1	1	1	2	0	0	1	0	1	1	2	1	2	2	2	2	1	2	1	2	0	0	47
2012	1	1	2	3	1	1	1	2	1	2	1	2	2	2	1	1	1	1	1	2	1	1	1	32
2013	1	1	1	2	1	0	0	1	0	1	1	2	2	2	1	1	1	1	1	2	1	1	1	44
2013	2	2	2	1	1	0	1	2	1	2	1	2	2	2	1	1	1	1	1	2	1	1	1	15
2013	2	1	1	1	2	1	0	1	0	1	1	2	2	2	1	1	1	1	1	3	5	1	1	36
2013	2	3	2	1	2	0	2	1	1	2	1	2	2	2	1	1	1	1	1	2	1	1	1	14
2013	2	3	2	3	2	1	0	1	0	1	1	1	1	2	2	3	3	2	2	2	4	1	1	2
2013	2	1	2	1	2	0	0	1	0	1	2	2	1	2	2	1	1	1	1	1	2	0	0	45
2013	1	1	2	1	2	0	2	2	1	1	1	2	2	2	1	1	1	1	1	1	2	0	0	46
2013	1	2	2	1	1	0	0	1	0	2	2	2	1	2	2	1	1	1	1	2	1	1	1	26
2013	2	1	1	3	2	0	0	1	0	2	2	2	1	2	2	1	1	1	1	2	1	0	0	44
2013	1	3	2	1	2	0	1	1	1	1	1	1	2	2	2	2	2	1	1	1	2	0	0	43
2013	1	1	3	3	2	1	2	2	1	1	2	2	2	2	2	5	0	1	1	2	1	0	0	44
2013	1	3	2	1	1	0	0	1	0	2	1	2	2	2	1	1	1	1	1	2	1	1	1	28
2013	1	3	2	1	2	0	0	1	0	1	1	2	2	2	1	1	1	1	1	2	1	1	1	32
2013	2	1	2	1	1	0	0	1	0	1	1	2	2	2	1	1	1	1	2	1	2	1	1	21
2013	2	2	2	3	2	0	0	1	0	1	2	1	3	1	2	5	5	2	2	2	4	1	1	2
2013	2	3	1	1	2	1	2	1	1	2	2	2	2	2	2	5	0	2	2	2	4	1	1	6
2013	1	1	2	1	2	1	2	1	1	1	2	2	1	2	2	1	1	2	2	1	3	1	1	12
2013	2	1	1	1	1	0	0	1	0	2	1	1	2	2	2	2	2	1	2	2	1	1	1	23
2013	2	1	2	1	1	0	1	1	1	2	2	1	2	2	2	1	1	2	2	2	4	1	1	2
2013	1	3	2	1	2	1	0	1	0	1	2	1	2	2	2	1	1	1	2	2	1	1	1	8
2013	2	2	1	3	2	0	2	2	1	1	2	1	2	2	2	1	1	1	1	2	1	0	0	42
2013	2	1	1	2	1	0	0	1	0	2	1	2	2	2	1	1	1	1	1	3	5	1	1	24
2013	2	1	2	3	1	0	0	1	0	1	1	2	2	2	1	1	1	2	2	2	4	1	1	29
2013	2	1	2	1	2	1	0	1	0	2	1	1	1	1	2	4	4	1	2	2	1	1	1	27
2013	2	3	2	1	1	0	0	1	0	1	1	2	2	2	1	1	1	1	1	1	2	0	0	41
2013	2	1	1	1	1	0	0	1	0	1	1	2	2	2	1	1	1	1	1	2	1	0	0	42
2013	2	1	2	1	2	0	0	1	0	1	1	2	2	2	1	1	1	3	3	3	5	0	0	40
2013	2	1	1	1	2	1	0	1	0	2	1	2	1	2	2	2	2	1	1	2	1	0	0	40
2013	1	1	1	3	1	1	2	1	1	2	2	2	2	2	2	5	0	1	1	2	1	0	0	39
2013	1	1	2	1	2	0	0	1	0	1	2	1	1	2	2	2	2	2	2	1	3	0	0	39
2013	2	1	2	1	2	1	2	1	1	2	2	2	1	2	2	1	1	1	1	1	2	0	0	42
2013	1	3	1	1	1	0	1	2	1	1	1	2	2	2	1	1	1	1	1	2	1	0	0	41
2013	2	1	1	2	2	0	2	1	1	2	2	2	2	2	2	5	0	1	1	1	2	0	0	36
2013	1	1	1	1	1	0	0	2	0	1	1	2	2	1	2	2	2	1	1	1	2	0	0	38
2013	2	1	2	1	1	0	1	1	1	2	1	2	2	2	1	1	1	1	1	1	2	0	0	38
2013	1	3	2	1	2	0	2	2	1	1	1	2	2	2	1	1	1	2	2	1	3	0	0	41
2013	2	2	2	1	1	0	1	1	1	1	2	2	1	2	2	1	1	2	2	2	4	0	0	38
2013	2	1	2	1	2	0	0	1	0	1	2	2	1	2	2	1	1	2	2	2	4	1	1	11
2013	2	2	2	1	2	1	2	1	1	1	2	1	1	2	2	2	2	2	2	2	4	1	1	6
2013	2	3	2	1	1	0	2	1	1	1	2	2	2	2	2	5	0	1	1	2	1	1	1	5
2013	2	3	2	1	1	0	0	1	0	1	2	2	2	1	2	1	1	1	1	1	2	0	0	38
2013	1	1	2	1	2	1	2	1	1	1	2	1	2	2	2	1	1	1	1	2	1	1	1	8
2013	2	2	2	3	1	1	0	1	0	2	1	2	2	2	1	1	1	1	1	2	1	1	1	21
2013	2	1	1	1	1	0	0	1	0	2	1	2	2	2	1	1	1	1	1	2	1	0	0	37
2011	2	1	2	3	2	1	0	1	0	2	2	2	2	2	2	5	0	3	3	3	5	1	1	17
2013	2	1	1	3	2	1	2	2	1	1	1	2	2	2	1	1	1	1	1	2	1	0	0	37
2013	1	2	1	1	1	0	0	1	0	1	1	1	2	2	2	2	2	1	1	2	1	0	0	36
2014	2	1	2	1	2	0	1	2	1	2	1	2	2	2	1	1	1	1	2	2	1	0	0	35
2014	2	3	1	2	1	1	1	2	1	2	1	2	2	2	1	1	1	1	3	2	5	1	1	22
2014	2	1	1	3	1	1	1	1	1	2	1	2	2	2	1	1	1	1	3	2	5	0	0	34
2014	2	3	2	1	2	0	0	2	0	2	1	2	2	1	2	2	2	1	1	2	1	1	1	34
2014	2	1	1	1	2	0	0	1	0	2	1	1	1	2	2	3	3	3	3	3	5	1	1	6
2014	1	1	1	2	2	0	0	1	0	1	1	2	2	2	1	1	1	1	1	2	1	0	0	34
2013	2	1	1	1	2	0	1	1	1	2	1	2	1	2	2	2	2	1	1	2	1	1	1	1
2014	1	1	1	1	2	0	0	1	0	1	2	1	2	2	2	1	1	1	1	2	1	0	0	32
2014	2	1	2	1	2	0	0	1	0	2	1	2	2	2	1	1	1	1	2	2	1	0	0	35
2014	2	1	2	1	1	1	1	1	1	1	1	1	2	2	2	2	2	1	1	2	1	0	0	25
2014	2	3	1	3	2	0	0	1	0	1	2	2	2	2	2	5	0	2	2	2	4	1	1	20
2014	2	1	1	1	2	0	1	2	1	2	2	2	1	2	2	1	1	1	2	2	1	0	0	32
2014	2	2	1	1	2	1	1	1	1	1	2	2	1	2	2	1	1	1	1	2	1	0	0	32
2014	2	1	1	1	1	1	2	1	1	1	1	2	2	2	1	1	1	1	1	1	2	0	0	32
2014	2	1	2	3	1	0	0	1	0	1	2	2	2	2	2	5	0	2	2	2	4	0	0	31
2014	2	1	1	1	2	0	0	1	0	2	1	1	2	2	2	2	2	1	1	2	1	1	1	6
2014	2	1	2	3	2	1	0	1	0	1	1	1	1	2	2	3	3	1	1	2	1	0	0	3
2014	2	1	1	1	2	0	1	2	1	1	1	2	2	2	1	1	1	1	1	2	1	0	0	31
2014	2	2	1	3	2	0	2	1	1	1	1	2	2	2	1	1	1	1	1	2	1	0	0	30
2014	1	3	2	1	2	1	0	1	0	1	2	2	1	2	2	1	1	2	2	2	4	1	1	17
2014	1	1	2	1	2	0	2	1	1	1	1	2	2	2	1	1	1	1	1	1	2	0	0	33
2014	2	1	2	1	2	0	1	1	1	2	1	2	2	2	1	1	1	3	3	3	5	1	1	1
2014	2	1	1	1	1	0	0	1	0	2	1	2	2	2	1	1	1	1	1	2	1	0	0	30
2014	2	1	1	1	2	1	0	1	0	2	1	2	2	2	1	1	1	1	2	2	1	0	0	26
2014	1	3	1	1	1	0	0	1	0	2	1	2	2	2	1	1	1	1	1	2	1	0	0	29
2014	2	3	1	1	1	0	0	2	0	2	1	1	2	2	2	2	2	1	1	2	1	1	1	14
2014	2	1	2	1	1	0	1	1	1	2	1	2	2	2	1	1	1	1	2	2	1	0	0	29
2014	1	3	1	1	1	1	0	1	0	1	2	1	2	2	2	1	1	2	2	1	3	0	0	28
2014	2	1	2	1	1	0	0	1	0	1	1	2	2	2	1	1	1	2	2	1	3	0	0	30
2014	2	1	2	2	1	0	0	1	0	2	1	2	2	2	1	1	1	1	1	2	1	0	0	30
2014	2	1	1	3	2	0	0	2	0	1	2	2	1	2	2	1	1	1	1	2	1	0	0	30
2014	2	1	1	1	2	1	0	1	0	1	1	2	2	2	1	1	1	1	2	2	1	0	0	25
2014	1	1	3	2	2	0	1	1	1	1	2	1	2	2	2	1	1	2	1	2	1	0	0	27
2014	2	1	1	2	1	0	1	2	1	2	1	2	2	1	2	2	2	1	1	2	1	0	0	33
2014	2	2	2	1	2	0	0	1	0	1	1	2	2	2	1	1	1	2	2	2	4	1	1	10
2014	2	1	1	1	2	0	0	1	0	2	1	2	1	2	2	2	2	1	1	2	1	0	0	24
2014	2	3	2	1	2	1	0	1	0	1	2	2	2	2	2	5	0	1	1	2	1	0	0	9
2014	1	2	2	1	2	0	2	2	1	1	2	1	2	2	2	1	1	2	2	1	3	0	0	26
2014	2	1	1	1	1	0	0	1	0	2	1	2	2	2	1	1	1	1	1	2	1	1	1	20
2014	2	3	2	3	2	0	0	1	0	1	2	1	1	2	2	2	2	2	2	1	3	0	0	24
2014	2	1	2	3	1	0	0	1	0	1	1	1	2	2	2	2	2	1	2	2	1	0	0	25
2014	2	2	2	1	1	0	0	1	0	1	2	1	1	2	2	2	2	1	1	2	1	1	1	19
2014	2	1	2	1	2	0	0	1	0	1	2	2	2	2	2	5	0	1	2	2	1	1	1	6
2013	2	1	2	3	2	1	0	1	0	2	1	2	2	2	1	1	1	3	3	3	5	1	1	0
2014	2	1	1	1	2	0	0	1	0	2	1	2	2	2	1	1	1	1	1	2	1	0	0	24
2015	2	1	2	3	2	0	2	2	1	1	1	2	2	2	1	1	1	2	2	2	4	1	1	8
2014	2	1	2	1	1	0	2	1	1	1	2	1	1	2	2	2	2	2	2	2	4	0	0	24
2014	2	2	1	1	2	0	0	1	0	2	2	1	1	2	2	2	2	1	2	2	1	1	1	4
2015	1	1	2	1	2	0	0	1	0	2	1	1	2	2	2	2	2	2	2	1	3	1	1	0
2014	2	1	1	1	1	1	1	1	1	2	1	2	2	2	1	1	1	1	1	2	1	0	0	24
2014	1	2	1	1	2	0	0	1	0	1	1	2	2	2	1	1	1	1	1	2	1	1	1	17
2015	2	1	2	1	1	0	0	1	0	1	2	2	1	2	2	1	1	1	2	1	2	0	0	22
2015	2	1	2	1	1	0	0	2	0	1	2	2	2	1	2	1	1	1	2	1	2	0	0	23
2015	2	1	1	1	1	1	2	1	1	2	1	2	2	2	1	1	1	1	1	2	1	0	0	23
2015	1	3	1	1	1	0	0	1	0	1	2	2	1	2	2	1	1	1	1	3	5	0	0	19
2014	1	2	1	1	1	0	2	1	1	1	1	2	2	2	1	1	1	1	1	1	2	0	0	31
2015	1	1	1	1	1	0	0	1	0	2	1	2	2	2	1	1	1	1	1	2	1	0	0	20
2015	2	1	1	1	1	1	0	1	0	2	2	2	2	2	2	5	0	1	1	2	1	0	0	23
2014	1	1	2	1	2	1	0	1	0	1	2	2	2	2	2	5	0	1	1	2	1	1	1	23
2015	1	3	2	1	1	0	0	1	0	2	1	2	2	2	1	1	1	1	1	1	2	0	0	21
2015	2	2	2	1	2	1	0	1	0	1	1	2	2	2	1	1	1	1	1	2	1	0	0	21
2015	1	1	1	1	1	0	0	1	0	2	2	2	1	2	2	1	1	1	1	2	1	0	0	21
2013	2	1	2	1	1	0	1	2	1	2	1	2	2	2	1	1	1	1	2	1	2	0	0	42
2015	2	1	2	1	1	0	0	2	0	2	1	2	2	2	1	1	1	1	2	2	1	0	0	19
2014	2	1	2	1	2	1	0	1	0	2	1	2	3	2	2	5	5	1	1	2	1	1	1	14
2015	2	1	2	1	1	0	0	1	0	1	1	2	2	2	1	1	1	1	1	3	5	0	1	17
2015	2	1	1	2	2	0	0	1	0	2	1	2	2	2	1	1	1	1	1	2	1	0	0	18
2015	1	1	1	1	1	0	1	1	1	1	2	2	2	2	2	5	0	1	1	1	2	0	0	19
2015	2	1	2	1	2	0	0	2	0	2	1	1	2	1	2	3	3	2	2	1	3	1	1	1
2014	2	2	1	3	1	1	2	1	1	1	1	1	1	2	2	3	3	2	2	1	3	1	1	14
2015	2	1	3	3	2	0	2	1	1	1	2	2	1	2	2	1	1	2	2	2	4	1	1	5
2014	1	3	2	1	2	1	2	1	1	2	2	2	2	2	2	5	0	2	1	2	1	1	1	18
2015	1	1	2	1	2	0	2	2	1	1	1	2	2	2	1	1	1	1	1	2	1	0	0	16
2015	2	1	3	1	1	0	1	1	1	2	2	2	1	2	2	1	1	1	1	1	2	0	0	16
2015	2	3	2	1	2	1	1	1	1	2	2	2	2	2	2	5	0	2	2	2	4	0	0	15
2014	1	1	1	1	2	1	0	2	0	1	1	2	2	2	1	1	1	1	2	1	2	0	0	25
2015	2	2	2	1	1	0	0	1	0	2	2	1	2	2	2	1	1	2	2	1	3	0	0	15
2015	2	1	2	3	2	1	0	1	0	1	2	1	1	2	2	2	2	2	2	2	4	1	1	7
2015	2	3	2	1	2	1	2	1	1	2	1	2	2	2	1	1	1	2	2	2	4	1	1	12
2015	2	3	2	3	1	1	0	1	0	1	1	1	1	1	2	4	4	2	2	1	3	1	1	10
2015	2	2	2	1	1	0	0	1	0	2	1	2	2	2	1	1	1	1	1	2	1	0	0	3
2015	1	2	2	1	2	1	2	1	1	1	2	2	2	2	2	5	0	1	1	2	1	0	0	13
2015	2	3	1	1	2	0	0	1	0	2	1	2	2	2	1	1	1	1	1	2	1	0	0	14
2015	2	1	1	2	2	0	0	1	0	1	1	2	2	2	1	1	1	1	1	2	1	0	0	18
2015	2	3	1	1	2	0	0	1	0	1	1	2	2	1	2	2	2	1	1	2	1	1	1	16
2015	1	3	2	1	1	0	2	1	1	1	1	2	2	2	1	1	1	1	1	1	2	0	0	5
2015	2	1	2	3	2	1	0	1	0	2	1	2	2	2	1	1	1	1	1	2	1	0	1	13
2015	2	1	1	3	2	0	0	1	0	2	2	3	3	2	2	5	5	1	1	2	1	0	0	14
2015	1	2	2	1	2	1	0	1	0	1	2	2	2	1	2	1	1	2	2	2	4	1	1	8
2015	2	1	2	2	2	0	0	1	0	1	1	2	2	2	1	1	1	1	1	2	1	0	0	13
2015	2	1	1	1	2	0	0	1	0	1	1	2	2	2	1	1	1	1	1	1	2	1	1	9
2015	2	1	2	2	1	0	0	1	0	1	2	1	2	2	2	1	1	1	1	2	1	1	1	3
2015	1	3	2	1	2	1	2	1	1	1	2	1	2	2	2	1	1	2	2	1	3	0	0	15
2015	1	1	1	1	1	0	0	2	0	2	1	2	2	2	1	1	1	1	1	2	1	0	0	12
2015	2	1	2	1	1	0	2	1	1	1	2	2	2	2	2	5	0	2	2	1	3	1	1	9
2015	2	1	1	1	1	0	0	1	0	1	1	2	2	2	1	1	1	1	2	1	2	0	0	13
2015	1	2	1	2	1	0	1	1	1	2	2	2	2	2	2	5	0	1	1	2	1	0	0	12
2015	1	1	2	1	1	0	0	2	0	1	1	1	2	2	2	2	2	1	1	2	1	0	0	13
2015	1	2	2	1	1	1	0	1	0	1	1	1	2	2	2	2	2	1	1	1	2	0	0	12
2015	2	1	2	3	1	0	0	2	0	1	1	1	2	2	2	2	2	1	2	1	2	0	0	12
2015	2	1	1	1	1	0	0	2	0	1	1	1	2	2	2	2	2	1	1	2	1	0	0	12
2015	2	1	2	1	1	0	0	1	0	1	2	1	2	2	2	1	1	1	1	2	1	0	0	13
2015	2	1	1	1	1	0	0	1	0	2	1	1	3	1	2	5	5	2	2	2	4	1	1	11
2015	2	2	2	1	2	1	2	1	1	2	1	2	2	2	1	1	1	1	1	1	2	0	0	21
2013	2	1	1	1	1	0	0	1	0	2	2	2	1	2	2	1	1	1	1	2	1	0	0	41
2015	2	1	2	1	2	1	2	1	1	1	2	1	1	2	2	2	2	2	2	2	4	0	0	12
2014	2	1	2	3	1	1	2	2	1	2	1	1	2	2	2	2	2	1	1	2	1	0	0	33
2010	2	1	1	1	2	1	2	1	1	1	1	2	2	2	1	1	1	1	1	2	1	1	1	11
2010	2	1	2	1	1	0	0	1	0	1	2	2	1	2	2	1	1	2	2	1	3	1	1	15
2010	2	1	1	1	1	0	0	1	0	2	1	2	2	2	1	1	1	1	1	2	1	1	1	59
2010	1	1	1	3	1	0	1	2	1	2	2	2	2	2	2	5	0	1	1	2	1	0	0	79
2010	2	1	1	3	2	0	0	1	0	2	1	2	1	2	2	2	2	1	1	2	1	1	1	74
2010	2	3	2	1	2	0	0	1	0	1	2	3	2	2	2	5	5	1	2	1	2	0	0	50
2010	2	1	2	1	2	1	2	1	1	1	1	2	2	2	1	1	1	1	1	2	1	1	1	37
2010	2	1	2	3	2	0	2	1	1	2	2	2	1	2	2	1	1	2	2	2	4	1	1	5
2010	2	1	2	1	1	1	0	1	0	1	2	2	3	2	2	5	5	2	2	2	4	1	1	20
2010	2	1	2	1	2	1	0	1	0	2	1	2	2	2	1	1	1	1	1	2	1	1	1	31
2010	2	1	1	1	2	1	2	1	1	2	1	2	2	2	1	1	1	1	1	2	1	0	0	79
2010	2	1	2	1	1	0	0	1	0	1	2	2	1	2	2	1	1	2	2	2	4	1	1	45
2010	2	1	1	1	1	0	2	1	1	2	2	2	2	2	2	5	0	1	1	2	1	0	0	82
2010	2	1	2	1	2	1	2	1	1	2	1	2	2	2	1	1	1	2	2	2	4	1	1	10
2010	1	1	2	1	1	0	0	1	0	1	1	2	2	2	1	1	1	1	1	2	1	1	1	37
2010	2	1	2	3	2	0	2	1	1	1	2	2	1	2	2	1	1	2	2	2	4	1	1	6
2010	2	1	1	1	1	0	0	1	0	1	2	2	2	2	2	5	0	1	2	2	1	0	0	72
2010	2	1	2	1	2	1	0	1	0	2	1	2	2	1	2	2	2	1	2	2	1	1	1	7
2010	2	1	2	3	2	1	2	1	1	1	1	1	2	2	2	2	2	1	1	2	1	1	1	35
2010	2	1	2	1	2	1	0	1	0	2	1	2	2	2	1	1	1	1	1	2	1	1	1	1
2010	2	1	2	1	2	0	0	1	0	1	2	1	1	1	2	3	3	1	1	1	2	1	1	2
2010	2	1	1	2	2	0	0	1	0	2	1	2	2	2	1	1	1	1	1	2	1	1	1	27
2010	2	1	2	3	2	0	0	1	0	2	1	2	1	1	2	3	3	1	1	2	1	0	1	1
2010	2	1	1	1	2	1	0	1	0	2	2	2	1	2	2	1	1	1	1	2	1	1	1	46
2010	1	2	1	1	2	1	0	1	0	2	1	2	1	2	2	2	2	1	1	2	1	1	1	24
2010	2	1	2	3	2	0	0	1	0	1	1	1	3	3	2	5	5	2	2	1	3	0	0	62
2010	2	1	1	2	2	0	0	1	0	1	1	2	2	2	1	1	1	1	1	2	1	1	1	27
2010	2	1	1	1	2	0	0	1	0	2	1	2	2	2	1	1	1	1	1	2	1	0	1	36
2010	2	1	1	2	2	0	2	1	1	2	1	2	2	2	1	1	1	1	1	2	1	1	1	66
2010	2	1	2	1	2	0	0	1	0	2	1	1	2	2	2	2	2	2	2	2	4	1	1	1
2010	2	2	2	1	1	0	0	1	0	1	2	1	2	2	2	1	1	2	2	2	4	1	1	0
2010	2	1	1	1	1	0	1	1	1	2	1	2	2	2	1	1	1	1	1	2	1	0	0	77
2010	2	1	2	1	2	1	2	1	1	1	1	1	1	2	2	3	3	1	2	1	2	1	1	24
2010	2	2	2	1	2	0	0	1	0	1	2	1	1	2	2	2	2	2	2	1	3	0	0	80
2010	1	1	1	1	1	0	0	1	0	1	1	2	2	2	1	1	1	1	1	2	1	0	0	83
2010	2	1	1	1	2	0	0	1	0	1	2	2	1	2	2	1	1	2	2	2	4	1	1	23
2010	2	1	1	2	1	0	0	1	0	2	1	2	2	2	1	1	1	1	1	2	1	0	0	82
2010	2	1	2	1	1	0	1	1	1	2	2	2	1	2	2	1	1	2	2	2	4	1	1	13
2011	2	1	2	3	2	0	0	1	0	1	1	1	1	2	2	3	3	1	1	2	1	1	1	10
2010	2	1	2	1	2	0	0	1	0	1	1	2	2	2	1	1	1	1	2	2	1	1	1	42
2011	2	1	1	2	1	0	0	1	0	2	2	2	2	2	2	5	0	1	1	2	1	1	1	44
2011	2	1	1	3	1	0	0	1	0	2	1	2	2	2	1	1	1	1	1	2	1	0	0	67
2010	2	1	1	2	2	1	0	1	0	1	1	2	2	2	1	1	1	1	2	2	1	1	1	14
2011	2	2	1	1	1	0	0	1	0	2	1	2	2	2	1	1	1	1	1	2	1	0	0	10
2011	1	1	2	1	1	0	0	1	0	2	1	2	2	2	1	1	1	1	1	2	1	1	1	33
2011	2	1	2	1	2	0	0	1	0	2	1	2	1	2	2	2	2	1	2	2	1	1	1	3
2011	1	1	2	1	1	0	0	1	0	1	2	1	2	2	2	1	1	1	2	1	2	0	0	66
2011	2	1	2	1	2	0	0	1	0	1	1	1	1	3	2	5	5	2	2	1	3	1	1	0
2011	1	2	1	1	1	0	2	1	1	1	1	3	3	3	2	5	5	1	2	2	1	1	1	20
2011	1	2	2	1	2	1	0	1	0	1	2	2	2	2	2	5	0	1	1	2	1	1	1	36
2011	2	1	2	1	2	0	0	1	0	1	2	2	1	2	2	1	1	1	1	1	2	0	0	66
2011	1	2	2	1	2	0	0	1	0	1	1	2	2	2	1	1	1	2	2	2	4	1	1	18
2011	2	1	2	1	1	0	2	1	1	2	2	2	1	2	2	1	1	1	1	2	1	0	0	65
2011	1	1	1	1	2	1	0	1	0	1	1	1	1	2	2	3	3	2	2	2	4	1	1	1
2011	2	1	2	1	1	0	0	1	0	2	1	3	2	2	2	5	5	1	1	2	1	1	1	16
2011	2	1	1	1	2	0	0	1	0	2	1	1	1	2	2	3	3	1	1	2	1	1	1	15
2011	1	1	2	1	2	0	1	1	1	1	1	1	1	2	2	3	3	2	2	1	3	1	1	19
2011	1	1	2	3	2	0	0	2	0	1	1	2	2	2	1	1	1	2	2	2	4	0	1	43
2011	1	2	2	1	2	1	0	1	0	1	2	1	2	2	2	1	1	1	2	1	2	1	1	53
2011	1	2	2	1	2	1	1	1	1	1	2	2	1	2	2	1	1	2	2	2	4	1	1	17
2011	1	1	1	1	2	1	0	1	0	1	1	2	1	1	2	3	3	2	2	2	4	1	1	5
2011	2	1	1	1	1	1	0	1	0	2	1	1	3	3	2	5	5	2	2	2	4	0	1	0
2011	2	1	2	1	1	1	0	1	0	2	1	2	2	2	1	1	1	1	1	2	1	1	1	13
2011	2	1	2	1	2	1	0	2	0	1	1	2	2	2	1	1	1	1	1	1	2	1	1	57
2011	2	1	2	1	1	0	0	1	0	2	1	2	2	2	1	1	1	1	1	2	1	1	1	14
2011	1	1	1	3	1	0	0	1	0	1	1	2	2	2	1	1	1	1	1	2	1	1	1	63
2011	2	1	2	1	1	0	0	1	0	1	1	2	2	2	1	1	1	2	2	2	4	1	1	14
2011	2	1	2	1	1	0	1	1	1	1	3	3	3	3	2	5	5	1	1	1	2	1	1	26
2011	2	1	1	3	1	0	2	1	1	2	1	2	2	2	1	1	1	1	1	2	1	0	1	53
2011	2	1	2	1	1	1	2	1	1	1	1	1	2	2	2	2	2	1	1	2	1	1	1	22
2011	2	1	1	3	2	0	0	1	0	2	1	2	2	2	1	1	1	2	2	2	4	1	1	0
2011	2	3	1	1	2	0	0	1	0	1	2	2	2	2	2	5	0	1	1	2	1	0	0	4
2011	2	1	2	1	2	0	0	1	0	1	2	2	2	2	2	5	0	2	2	2	4	1	1	10
2011	1	1	1	3	1	0	0	1	0	2	1	2	2	2	1	1	1	1	1	2	1	0	0	61
2011	2	1	2	1	2	0	0	2	0	1	1	2	1	1	2	3	3	2	2	2	4	1	1	6
2010	2	1	1	1	1	0	0	1	0	2	2	1	1	2	2	2	2	1	1	2	1	0	0	68
2011	2	1	2	1	1	1	0	1	0	2	1	2	2	2	1	1	1	1	1	2	1	0	0	63
2011	2	1	2	1	2	0	0	1	0	2	3	3	1	3	2	5	5	1	1	2	1	0	0	61
2011	2	2	2	1	1	0	0	1	0	1	1	1	2	2	2	2	2	2	2	1	3	1	1	0
2011	2	1	2	2	1	0	0	1	0	1	1	2	2	2	1	1	1	1	1	2	1	0	0	62
2011	2	1	2	1	2	1	0	1	0	1	1	1	2	3	2	5	5	1	1	2	1	0	0	53
2011	2	1	1	1	1	0	0	1	0	1	1	2	1	2	2	2	2	1	1	2	1	0	0	67
2011	2	1	1	1	2	0	2	1	1	1	1	2	2	2	1	1	1	1	1	2	1	0	1	37
2011	2	1	1	2	1	1	0	1	0	2	1	2	2	2	1	1	1	1	2	2	1	1	1	26
2011	2	1	2	3	2	1	0	1	0	1	2	1	1	2	2	2	2	3	3	1	5	0	1	25
2011	2	1	2	3	1	0	0	1	0	1	1	2	2	2	1	1	1	2	2	2	4	1	1	2
2011	2	1	2	1	2	1	0	1	0	1	2	2	2	2	2	5	0	2	2	2	4	1	1	12
2011	1	1	2	1	1	0	2	1	1	1	2	1	1	2	2	2	2	1	2	1	2	0	0	64
2011	1	1	2	3	1	0	1	1	1	2	2	2	2	2	2	5	0	1	1	1	2	0	0	64
2011	2	2	1	1	1	0	1	1	1	2	3	3	1	3	2	5	5	1	2	2	1	1	1	18
2011	2	1	2	1	2	0	2	2	1	1	2	1	2	2	2	1	1	2	2	1	3	0	0	65
2012	1	1	1	1	1	0	0	1	0	2	1	2	1	2	2	2	2	1	1	2	1	0	0	56
2012	2	1	2	1	2	0	0	1	0	2	1	2	2	2	1	1	1	1	1	2	1	1	1	39
2012	2	1	1	1	2	0	0	1	0	1	1	1	2	2	2	2	2	2	2	1	3	0	0	57
2012	2	1	2	1	2	0	0	1	0	2	1	2	2	2	1	1	1	1	1	2	1	1	1	8
2012	2	1	3	1	1	0	2	1	1	1	2	2	2	2	2	5	0	2	2	1	3	0	0	58
2012	2	2	2	1	1	1	2	1	1	1	2	1	2	2	2	1	1	2	2	2	4	1	1	31
2012	2	1	1	2	1	0	1	1	1	1	1	3	2	2	2	5	5	2	2	1	3	0	0	50
2012	2	1	1	1	2	0	0	1	0	2	1	2	2	2	1	1	1	1	1	2	1	0	0	59
2012	1	1	3	1	1	0	1	1	1	1	2	1	2	2	2	1	1	1	1	1	2	1	1	0
2012	2	1	1	1	1	0	0	1	0	1	2	1	2	2	2	1	1	1	1	1	2	0	0	58
2012	2	1	1	3	1	0	1	1	1	1	2	1	2	2	2	1	1	2	2	1	3	0	0	53
2012	2	2	2	1	2	0	0	1	0	2	2	1	2	2	2	1	1	2	2	2	4	1	1	1
2012	2	1	2	1	2	1	0	1	0	1	2	1	2	2	2	1	1	2	2	1	3	0	0	52
2012	2	2	2	3	1	1	2	1	1	1	1	2	2	2	1	1	1	1	2	2	1	1	1	14
2012	2	1	2	1	1	0	1	1	1	1	1	2	2	2	1	1	1	1	2	1	2	0	0	50
2012	2	1	2	1	2	1	0	1	0	1	1	2	2	1	2	2	2	2	2	1	3	0	0	48
2012	2	1	2	1	2	1	2	1	1	1	2	1	2	2	2	1	1	2	2	2	4	0	1	3
2012	2	2	2	1	2	1	2	1	1	1	1	1	1	1	2	4	4	2	2	2	4	1	1	12
2012	2	1	1	2	1	0	0	1	0	1	1	1	2	2	2	2	2	1	1	2	1	1	1	19
2012	2	1	2	1	2	0	0	1	0	1	1	2	2	2	1	1	1	1	1	2	1	1	1	21
2012	2	1	2	3	2	0	2	1	1	2	2	1	1	2	2	2	2	2	2	2	4	1	1	2
2012	2	1	1	1	2	1	0	1	0	1	1	2	3	2	2	5	5	1	1	2	1	1	1	28
2012	2	1	1	3	2	1	0	1	0	2	1	1	1	3	2	5	5	1	1	2	1	1	1	27
2012	2	1	2	3	2	1	2	1	1	1	2	2	1	2	2	1	1	1	1	1	2	1	1	27
2012	2	1	1	1	2	0	0	1	0	1	1	2	2	2	1	1	1	1	2	1	2	0	0	55
2012	2	1	2	1	1	1	2	1	1	1	1	1	1	2	2	3	3	1	1	2	1	1	1	12
2012	2	1	2	1	2	1	0	1	0	2	1	1	1	3	2	5	5	1	1	1	2	1	1	2
2012	2	1	2	1	2	0	0	1	0	2	2	2	1	2	2	1	1	1	1	2	1	1	1	50
2012	2	1	1	3	2	1	0	1	0	1	1	2	1	2	2	2	2	1	1	2	1	1	1	25
2012	2	1	2	1	2	1	0	1	0	2	1	2	2	2	1	1	1	1	1	2	1	1	1	24
2012	2	1	2	1	2	0	1	1	1	1	2	2	1	2	2	1	1	2	2	2	4	1	1	22
2012	2	1	2	1	1	0	2	2	1	1	1	2	2	2	1	1	1	2	2	2	4	1	1	36
2012	2	2	1	2	1	0	1	1	1	2	2	2	2	2	2	5	0	1	1	2	1	0	0	57
2012	2	1	1	1	1	0	0	1	0	1	2	1	2	2	2	1	1	1	2	1	2	1	1	18
2012	2	2	1	1	1	1	2	1	1	1	1	2	2	2	1	1	1	1	2	1	2	0	0	52
2012	2	2	2	1	2	1	0	1	0	2	1	1	1	3	2	5	5	1	1	1	2	1	1	0
2012	1	1	1	1	2	0	2	1	1	1	1	2	2	2	1	1	1	1	1	2	1	1	1	43
2012	2	1	2	1	2	0	0	1	0	2	1	2	2	1	2	2	2	1	1	1	2	1	1	0
2012	2	1	1	1	1	0	0	2	0	1	1	2	2	2	1	1	1	2	2	2	4	1	1	13
2012	2	1	2	1	1	0	0	1	0	1	2	2	1	2	2	1	1	2	2	1	3	1	1	9
2012	2	2	2	1	2	0	2	1	1	2	1	2	2	2	1	1	1	2	2	1	3	1	1	6
2012	2	1	2	3	1	0	0	1	0	2	1	2	2	2	1	1	1	1	1	2	1	0	0	57
2012	2	1	2	3	2	0	0	1	0	1	1	2	2	2	1	1	1	1	1	2	1	1	1	43
2012	2	2	2	3	1	0	2	1	1	1	2	2	2	2	2	5	0	2	2	1	3	0	0	55
2012	2	1	1	1	2	0	0	1	0	2	2	2	1	2	2	1	1	1	1	2	1	0	0	53
2012	2	1	2	1	1	0	0	1	0	2	1	2	2	2	1	1	1	1	1	2	1	1	1	47
2012	1	3	1	1	1	0	0	1	0	2	1	2	2	2	1	1	1	1	1	2	1	1	1	29
2012	2	1	1	1	1	0	0	1	0	1	1	2	2	2	1	1	1	1	1	2	1	1	1	21
2012	1	1	1	1	1	0	2	1	1	1	1	2	2	2	1	1	1	1	1	2	1	0	0	51
2012	2	1	2	3	2	1	0	1	0	1	2	2	2	2	2	5	0	2	1	1	2	1	1	12
2012	2	1	2	3	2	1	0	1	0	1	1	2	2	2	1	1	1	1	1	2	1	1	1	28
2012	2	1	2	1	2	1	1	1	1	1	2	2	2	2	2	5	0	2	2	2	4	1	1	20
2012	2	1	2	1	2	1	1	1	1	2	2	2	1	2	2	1	1	1	1	2	1	0	1	30
2012	2	1	2	1	1	0	0	1	0	1	1	2	2	2	1	1	1	1	1	1	2	1	1	30
2012	2	1	2	1	1	0	0	1	0	2	2	2	2	1	2	1	1	1	1	2	1	1	1	22
2012	2	1	2	2	1	0	0	1	0	2	1	2	2	2	1	1	1	1	1	2	1	0	0	49
2012	2	1	1	1	1	0	0	1	0	2	1	2	2	2	1	1	1	2	2	2	4	1	1	8
2012	1	1	2	1	1	0	0	1	0	2	1	1	2	2	2	2	2	1	1	2	1	1	1	14
2012	2	1	2	1	2	0	0	1	0	1	1	1	2	2	2	2	2	2	2	1	3	1	1	18
2012	2	1	2	1	2	0	2	2	1	1	2	2	1	2	2	1	1	2	2	2	4	1	1	27
2012	2	1	1	1	1	0	0	1	0	2	1	2	2	2	1	1	1	1	1	2	1	0	0	49
2013	2	2	2	1	2	1	0	1	0	1	2	2	1	2	2	1	1	1	1	2	1	0	0	4
2013	2	1	2	1	1	0	0	1	0	1	1	2	2	2	1	1	1	2	2	1	3	1	1	42
2013	2	1	1	1	2	0	0	1	0	2	1	2	2	2	1	1	1	1	1	2	1	0	1	6
2013	1	1	2	1	1	0	0	1	0	1	1	1	3	3	2	5	5	2	2	2	4	1	1	5
2013	2	1	2	1	1	1	2	1	1	2	1	2	2	2	1	1	1	1	1	2	1	1	1	44
2013	2	1	1	1	1	0	0	1	0	2	1	2	1	2	2	2	2	1	1	2	1	0	0	40
2013	2	1	1	3	1	0	0	1	0	2	2	2	2	2	2	5	0	1	1	2	1	0	0	47
2013	2	2	2	1	1	0	0	1	0	2	1	2	2	2	1	1	1	1	1	2	1	0	1	46
2013	2	1	2	1	2	1	0	1	0	1	2	2	2	2	2	5	0	1	2	2	1	0	0	43
2013	1	1	2	1	2	0	2	1	1	1	2	1	2	2	2	1	1	2	2	2	4	0	0	41
2013	2	1	2	1	2	1	0	1	0	2	1	1	1	2	2	3	3	1	1	1	2	0	0	43
2013	2	1	2	1	2	1	0	1	0	2	1	2	2	2	1	1	1	1	2	1	2	0	0	44
2013	2	2	2	1	1	0	0	1	0	1	1	2	2	2	1	1	1	2	2	2	4	1	1	11
2013	2	1	2	1	2	0	0	1	0	2	1	2	3	2	2	5	5	1	1	2	1	1	1	37
2013	2	1	1	1	1	0	0	1	0	2	1	2	2	2	1	1	1	1	2	2	1	0	0	39
2013	1	1	2	1	2	0	2	1	1	1	2	2	1	2	2	1	1	2	2	1	3	0	0	45
2013	2	1	2	1	2	0	0	1	0	1	1	2	1	2	2	2	2	1	2	2	1	1	1	19
2013	2	1	2	1	2	0	0	1	0	1	2	1	2	2	2	1	1	2	2	2	4	1	1	36
2013	1	1	2	1	2	1	0	1	0	1	1	1	1	1	2	4	4	1	2	2	1	1	1	34
2013	2	1	2	3	2	0	0	1	0	2	1	2	2	2	1	1	1	1	2	2	1	0	0	45
2013	2	1	2	3	1	0	1	1	1	1	1	2	2	2	1	1	1	1	1	2	1	0	0	36
2013	1	1	2	1	1	0	0	1	0	1	2	2	1	2	2	1	1	1	1	2	1	0	0	38
2013	2	1	1	1	2	1	0	1	0	1	1	2	2	2	1	1	1	1	1	2	1	1	1	13
2013	2	1	2	1	2	0	0	1	0	1	1	2	2	2	1	1	1	2	2	1	3	0	0	36
2013	2	2	1	1	2	1	0	1	0	1	1	3	3	1	2	5	5	1	2	1	2	1	1	16
2013	1	1	2	1	1	0	0	1	0	1	1	1	1	2	2	3	3	1	1	2	1	1	1	37
2013	2	1	1	3	2	0	0	1	0	1	2	2	1	2	2	1	1	1	2	1	2	0	0	40
2013	2	4	3	2	2	0	2	1	1	2	1	2	2	2	1	1	1	1	2	2	1	0	0	43
2013	2	1	1	1	1	0	0	2	0	2	1	2	2	1	2	2	2	1	2	2	1	1	1	12
2013	1	2	1	3	2	0	0	1	0	1	1	2	1	2	2	2	2	1	1	1	2	0	0	4
2013	2	1	1	1	1	0	0	1	0	2	1	1	2	2	2	2	2	1	2	2	1	1	1	0
2013	2	1	2	1	2	1	0	1	0	1	2	1	1	2	2	2	2	2	2	1	3	0	0	15
2013	2	2	1	3	2	1	2	1	1	1	2	1	3	2	2	5	5	2	2	2	4	1	1	32
2013	2	2	3	3	2	0	1	1	1	1	1	2	1	2	2	2	2	2	2	2	4	1	1	9
2013	2	1	1	1	1	0	0	1	0	2	1	2	2	2	1	1	1	1	1	2	1	0	0	47
2013	2	1	2	1	2	0	0	1	0	1	2	1	2	2	2	1	1	2	2	1	3	0	0	38
2013	2	1	2	1	1	0	0	1	0	1	1	1	2	2	2	2	2	1	1	1	2	1	1	41
2013	2	1	2	1	2	0	0	2	0	1	1	2	2	2	1	1	1	1	1	3	5	1	1	24
2013	2	1	2	1	2	0	0	1	0	1	2	2	1	2	2	1	1	1	2	2	1	1	1	8
2013	2	1	1	1	1	0	0	1	0	2	1	2	2	2	1	1	1	1	1	2	1	0	0	36
2013	2	1	1	1	1	0	0	1	0	1	2	1	2	2	2	1	1	1	1	2	1	1	1	28
2013	2	1	2	2	2	0	0	1	0	2	1	2	2	2	1	1	1	1	1	2	1	1	1	14
2013	1	1	2	3	2	0	2	2	1	1	2	2	2	2	2	5	0	2	2	2	4	1	1	13
2014	2	1	1	2	2	0	0	1	0	2	1	2	2	2	1	1	1	1	1	2	1	0	0	32
2014	2	2	2	2	2	0	0	1	0	1	1	2	2	2	1	1	1	1	1	2	1	0	0	28
2014	2	2	2	1	2	1	0	1	0	1	2	2	1	2	2	1	1	1	1	1	2	1	1	19
2014	2	1	1	2	2	1	2	1	1	1	2	2	2	2	2	5	0	1	1	2	1	0	0	34
2014	2	1	2	1	1	1	0	1	0	1	1	1	1	2	2	3	3	1	1	1	2	1	1	25
2014	2	2	1	1	2	0	0	1	0	2	1	2	2	2	1	1	1	1	1	2	1	1	1	30
2014	2	1	2	1	1	1	0	1	0	1	2	1	1	2	2	2	2	2	2	2	4	1	1	5
2014	2	1	1	2	2	0	0	1	0	2	1	2	2	2	1	1	1	1	1	2	1	0	0	23
2014	2	1	2	1	2	0	0	1	0	1	2	1	2	2	2	1	1	2	2	1	3	0	0	34
2014	2	1	2	1	2	0	0	1	0	1	1	2	1	2	2	2	2	1	1	2	1	0	0	28
2014	2	1	2	3	1	0	2	1	1	1	2	2	2	2	2	5	0	2	2	2	4	1	1	24
2014	2	1	2	1	2	0	0	1	0	2	1	2	1	2	2	2	2	1	1	2	1	1	1	0
2014	1	1	1	2	1	0	0	1	0	1	2	1	2	2	2	1	1	1	1	1	2	0	0	20
2014	2	1	2	1	2	0	0	1	0	2	1	2	2	2	1	1	1	1	1	2	1	1	1	19
2014	2	1	1	1	1	0	0	1	0	2	1	2	2	2	1	1	1	1	2	2	1	1	1	0
2014	1	1	2	1	2	0	0	1	0	1	1	1	2	2	2	2	2	2	2	1	3	0	0	30
2014	1	2	2	1	2	1	2	1	1	1	1	2	2	2	1	1	1	1	2	2	1	0	0	33
2014	2	1	1	2	2	1	0	1	0	1	2	2	1	2	2	1	1	1	1	2	1	0	0	32
2014	2	1	1	1	1	0	0	1	0	2	1	2	2	2	1	1	1	1	1	2	1	0	0	24
2014	2	2	1	2	2	1	0	1	0	1	1	2	2	2	1	1	1	1	1	2	1	0	0	27
2014	2	1	1	2	1	0	0	1	0	2	1	2	2	2	1	1	1	2	2	2	4	1	1	0
2014	1	1	2	1	2	1	0	1	0	1	2	2	1	2	2	1	1	3	3	3	5	1	1	12
2014	2	1	2	3	1	0	0	1	0	1	1	1	2	1	2	3	3	2	2	1	3	1	1	12
2014	2	1	2	1	2	0	0	1	0	1	1	2	2	2	1	1	1	2	2	2	4	1	1	4
2014	2	1	1	1	1	0	0	1	0	2	1	2	2	2	1	1	1	1	1	2	1	0	0	32
2014	2	1	2	1	1	0	0	1	0	1	2	1	2	2	2	1	1	1	1	1	2	0	0	34
2014	2	1	2	3	2	0	2	1	1	1	1	2	1	2	2	2	2	2	2	2	4	0	0	33
2014	2	1	2	1	1	0	0	2	0	1	1	1	2	1	2	3	3	1	1	2	1	1	1	3
2014	2	1	1	1	2	0	0	1	0	1	1	2	1	2	2	2	2	1	1	2	1	1	1	17
2014	1	1	2	1	1	0	2	1	1	1	2	1	2	2	2	1	1	1	1	1	2	0	0	27
2014	2	1	1	1	2	0	0	1	0	2	1	2	2	1	2	2	2	1	1	2	1	0	1	1
2014	2	1	1	2	2	0	0	1	0	2	2	1	2	2	2	1	1	1	1	2	1	1	1	0
2014	1	1	2	1	1	0	0	1	0	1	1	2	2	2	1	1	1	1	1	2	1	0	0	13
2014	1	1	1	1	1	1	0	1	0	2	1	2	2	2	1	1	1	1	1	2	1	0	0	25
2014	2	1	2	1	1	0	0	1	0	2	1	1	1	2	2	3	3	1	1	1	2	1	1	0
2014	2	1	1	1	2	0	0	1	0	2	2	1	2	2	2	1	1	1	1	2	1	1	1	26
2014	2	1	1	3	1	0	0	1	0	2	1	2	2	2	1	1	1	1	2	2	1	1	1	6
2014	2	1	2	1	2	1	0	1	0	2	2	2	2	2	2	5	0	2	2	2	4	1	1	0
2014	2	1	2	1	2	1	0	1	0	1	1	1	2	2	2	2	2	2	2	2	4	1	1	11
2014	2	2	2	1	2	0	0	1	0	2	1	1	2	2	2	2	2	1	1	2	1	1	1	22
2014	2	1	1	1	2	0	0	1	0	1	1	2	1	2	2	2	2	1	1	2	1	0	0	33
2014	2	1	1	2	2	1	0	1	0	2	1	2	2	2	1	1	1	1	1	2	1	0	0	29
2014	2	1	2	1	1	0	0	1	0	1	2	2	1	2	2	1	1	1	1	1	2	1	1	30
2014	1	1	2	1	2	1	0	1	0	1	2	1	2	2	2	1	1	1	1	1	2	0	0	26
2014	1	1	1	1	1	0	0	1	0	1	1	2	2	1	2	2	2	1	1	1	2	0	0	22
2014	2	1	1	3	1	1	0	1	0	2	1	2	2	2	1	1	1	1	2	2	1	1	1	29
2014	2	1	3	3	1	0	1	2	1	1	1	2	2	2	1	1	1	1	1	2	1	0	0	24
2014	2	1	1	3	2	0	0	1	0	1	2	2	1	2	2	1	1	2	2	2	4	1	1	7
2014	2	1	2	1	2	0	2	1	1	1	2	2	1	2	2	1	1	2	2	1	3	0	0	17
2014	2	1	2	1	1	0	0	1	0	1	2	2	1	2	2	1	1	1	1	1	2	1	1	9
2014	2	1	2	3	2	1	0	1	0	2	2	2	1	2	2	1	1	1	1	2	1	0	0	25
2014	2	1	1	2	1	0	0	1	0	2	1	2	2	2	1	1	1	1	1	2	1	0	1	18
2014	2	1	1	1	1	0	2	1	1	1	1	2	2	2	1	1	1	1	1	2	1	0	0	24
2014	2	1	2	3	2	0	0	1	0	1	2	2	1	1	2	2	2	2	2	2	4	1	1	1
2011	2	1	1	1	2	0	0	1	0	1	1	2	2	2	1	1	1	1	1	2	1	1	1	55
2015	2	1	2	3	2	1	2	1	1	1	2	2	2	2	2	5	0	1	1	2	1	0	0	15
2015	2	1	2	1	2	0	0	1	0	2	1	2	2	2	1	1	1	1	1	2	1	0	0	22
2015	1	2	2	1	2	0	0	2	0	2	1	2	2	2	1	1	1	2	2	2	4	1	1	1
2015	1	2	2	1	1	1	0	1	0	1	1	1	2	2	2	2	2	1	1	1	2	0	0	15
2015	2	2	2	1	1	1	0	1	0	1	1	2	2	2	1	1	1	1	2	2	1	1	1	3
2015	2	1	1	1	2	0	0	1	0	1	1	2	1	2	2	2	2	1	1	1	2	0	0	17
2015	2	1	2	1	1	0	2	1	1	1	2	2	1	2	2	1	1	2	2	1	3	0	0	23
2015	2	2	1	3	2	0	0	1	0	1	1	2	2	2	1	1	1	1	1	2	1	0	0	12
2015	2	3	1	1	1	1	0	1	0	1	1	2	1	1	2	3	3	2	2	2	4	1	1	14
2015	2	1	2	2	2	0	0	1	0	1	1	2	2	2	1	1	1	1	2	2	1	1	1	10
2015	2	1	1	1	2	0	0	1	0	1	1	2	2	2	1	1	1	1	1	2	1	0	0	15
2015	2	1	2	3	1	0	0	1	0	1	1	2	2	2	1	1	1	2	2	1	3	0	0	2
2015	2	1	2	1	1	0	0	1	0	1	2	1	2	2	2	1	1	2	2	1	3	1	1	1
2015	1	1	1	1	1	0	0	1	0	1	2	2	1	2	2	1	1	2	2	1	3	0	0	13
2015	2	1	2	3	1	1	1	1	1	1	1	2	2	2	1	1	1	1	1	2	1	0	0	15
2015	1	1	1	2	2	0	0	2	0	2	1	2	2	2	1	1	1	1	1	2	1	0	0	16
2015	2	1	2	1	2	1	0	1	0	1	1	2	1	3	2	5	5	1	1	2	1	1	1	12
2015	2	1	2	1	2	1	0	1	0	1	1	2	1	2	2	2	2	1	1	3	5	0	0	8
2015	2	1	2	1	1	0	0	1	0	1	1	1	2	1	2	3	3	2	2	2	4	1	1	0
2015	1	1	2	1	2	0	0	1	0	1	1	2	2	2	1	1	1	1	1	2	1	0	0	13
2015	2	1	1	1	2	0	0	1	0	2	1	2	1	2	2	2	2	1	1	2	1	1	1	0
2015	2	1	2	3	1	0	0	1	0	1	1	2	2	2	1	1	1	1	1	1	2	0	0	3
2015	2	1	2	1	2	1	0	1	0	1	2	2	1	1	2	2	2	2	2	2	4	0	0	18
2015	2	1	2	3	2	1	0	1	0	2	2	2	2	2	2	5	0	1	2	2	1	0	0	21
2015	2	1	1	2	2	1	0	1	0	1	1	1	2	2	2	2	2	1	1	2	1	0	0	16
2015	2	1	1	2	1	0	0	1	0	1	1	2	2	2	1	1	1	1	1	2	1	0	0	16
2015	2	2	2	3	2	1	0	1	0	1	2	2	2	2	2	5	0	2	2	2	4	1	1	3
2015	2	1	2	1	1	0	0	1	0	1	2	2	1	2	2	1	1	2	2	2	4	1	1	10
2015	2	1	2	3	1	0	0	1	0	1	1	1	2	2	2	2	2	1	1	1	2	1	1	0
2015	2	1	2	1	2	0	0	1	0	2	1	1	1	2	2	3	3	1	1	2	1	0	0	22
2015	1	1	1	3	1	0	0	1	0	1	2	1	2	2	2	1	1	1	1	2	1	0	0	18
2015	2	1	2	1	1	0	0	1	0	2	1	2	2	2	1	1	1	1	2	2	1	1	1	9
2015	1	1	2	1	2	0	0	1	0	1	1	2	2	2	1	1	1	1	1	2	1	0	0	16
2015	1	1	1	1	2	1	0	1	0	2	1	1	2	2	2	2	2	2	2	2	4	1	1	5
2015	2	1	1	1	2	0	0	1	0	1	1	2	2	2	1	1	1	2	2	1	3	0	0	9
2015	2	1	2	1	2	0	0	2	0	1	1	1	1	1	2	4	4	1	1	2	1	1	1	1
2015	2	1	2	3	2	0	0	1	0	1	1	2	1	2	2	2	2	1	1	2	1	0	0	16
2015	1	1	2	1	1	0	0	1	0	2	1	2	2	2	1	1	1	1	1	2	1	1	1	17
2015	1	2	1	1	1	0	0	1	0	1	1	2	2	2	1	1	1	1	1	1	2	0	0	12
2015	1	1	1	1	1	1	0	1	0	1	1	2	1	2	2	2	2	1	2	1	2	0	0	13
2015	1	4	1	1	1	0	0	2	0	2	1	1	2	2	2	2	2	1	1	2	1	0	0	13
2015	2	1	1	1	2	0	0	1	0	2	1	2	1	2	2	2	2	1	1	2	1	0	0	13
2015	2	1	1	1	2	0	0	1	0	2	2	2	2	2	2	5	0	1	1	2	1	0	1	1
2015	2	1	2	1	1	0	2	1	1	2	1	1	1	3	2	5	5	2	2	2	4	1	1	13
2015	2	2	2	3	2	1	0	1	0	1	1	2	1	2	2	2	2	2	2	2	4	1	1	6
2015	2	1	2	1	1	1	0	1	0	1	2	2	2	2	2	5	0	1	2	2	1	1	1	5
2015	2	1	2	1	2	1	0	1	0	1	1	2	2	2	1	1	1	1	1	2	1	0	0	18
2015	2	1	2	1	1	0	0	1	0	1	2	2	1	2	2	1	1	2	2	2	4	1	1	12
2015	2	1	1	1	2	0	0	1	0	1	2	2	2	2	2	5	0	1	1	2	1	0	0	21
2015	2	1	1	1	1	0	0	1	0	1	1	2	2	2	1	1	1	1	1	2	1	0	0	7
2015	2	4	2	1	2	1	0	1	0	1	2	2	2	2	2	5	0	2	2	2	4	1	1	12
2015	2	1	2	1	2	1	0	1	0	1	1	2	2	2	1	1	1	2	2	2	4	0	0	16
2015	2	1	2	3	2	0	0	1	0	2	1	2	2	2	1	1	1	3	3	3	5	0	1	1
2010	1	2	2	1	2	1	2	1	1	1	2	2	2	2	2	5	0	2	2	1	3	0	0	74
2011	2	1	2	1	2	0	2	1	1	2	2	2	2	2	2	5	0	1	1	2	1	1	1	26
2011	2	1	2	1	1	0	0	2	0	1	1	1	1	2	2	3	3	2	1	2	1	1	1	6
2010	2	1	2	1	1	0	1	1	1	1	1	1	2	2	2	2	2	1	1	1	2	1	1	24
2010	2	1	2	1	1	0	0	1	0	1	2	1	2	2	2	1	1	1	1	2	1	1	1	11
2010	2	2	1	1	1	0	1	1	1	1	1	2	2	2	1	1	1	1	1	2	1	0	0	82
2010	2	1	1	1	2	0	1	1	1	1	1	1	1	2	2	3	3	1	1	1	2	0	0	80
2010	2	2	2	3	2	0	2	1	1	1	2	2	1	2	2	1	1	2	2	2	4	1	1	5
2010	2	2	2	1	2	1	2	1	1	1	1	2	2	2	1	1	1	2	2	1	3	1	1	9
2010	2	1	1	1	1	0	2	1	1	2	1	2	2	2	1	1	1	1	1	2	1	0	0	78
2010	2	1	2	1	2	0	1	2	1	1	1	1	1	2	2	3	3	2	2	2	4	1	1	7
2010	1	1	1	1	2	0	0	1	0	1	1	2	2	2	1	1	1	1	1	1	2	1	1	69
2010	2	1	1	1	2	1	2	1	1	1	1	2	1	2	2	2	2	1	1	3	5	1	1	54
2010	2	2	2	1	2	0	0	2	0	1	2	2	1	1	2	2	2	2	2	2	4	1	1	9
2010	2	2	2	1	1	0	0	2	0	1	2	1	2	2	2	1	1	1	1	1	2	1	1	26
2010	2	1	2	1	2	1	0	1	0	2	2	2	2	2	2	5	0	1	1	2	1	1	1	1
2010	1	2	2	1	2	1	2	1	1	1	1	2	1	2	2	2	2	2	2	2	4	1	1	10
2010	2	2	2	3	2	0	0	2	0	2	1	2	2	2	1	1	1	1	2	2	1	1	1	5
2010	2	1	2	1	2	0	0	1	0	1	2	2	1	2	2	1	1	2	2	2	4	1	1	5
2010	2	1	2	1	1	0	2	1	1	1	2	1	2	2	2	1	1	2	2	2	4	0	0	80
2010	2	1	1	1	1	0	1	1	1	1	1	2	2	2	1	1	1	1	2	2	1	0	0	80
2010	2	1	2	1	1	0	1	1	1	1	2	2	2	2	2	5	0	2	2	2	4	1	1	58
2010	2	2	2	1	1	0	1	2	1	1	2	2	2	2	2	5	0	2	2	2	4	0	0	78
2010	2	1	2	1	2	0	0	2	0	2	1	2	2	2	1	1	1	1	1	3	5	1	1	1
2010	2	2	1	1	2	0	0	1	0	2	2	2	1	2	2	1	1	1	1	2	1	1	1	60
2010	2	2	2	1	2	0	1	2	1	1	1	2	2	2	1	1	1	1	1	2	1	1	1	33
2010	2	2	2	1	1	0	0	1	0	1	2	1	2	2	2	1	1	1	2	1	2	1	1	34
2010	2	1	2	2	1	0	0	1	0	2	1	2	2	2	1	1	1	1	1	2	1	1	1	5
2010	2	2	2	3	2	0	2	1	1	1	2	2	1	2	2	1	1	2	2	2	4	1	1	17
2010	2	1	2	1	1	0	0	1	0	1	2	2	1	2	2	1	1	2	2	2	4	1	1	9
2010	2	1	2	1	2	1	2	2	1	1	1	1	2	2	2	2	2	1	2	2	1	1	1	24
2010	2	3	2	3	1	0	2	2	1	2	1	2	2	2	1	1	1	1	1	2	1	0	0	76
2010	1	1	1	1	1	0	0	2	0	2	1	2	2	2	1	1	1	1	1	2	1	0	1	18
2010	1	2	2	1	2	1	0	2	0	1	2	1	2	1	2	2	2	2	2	1	3	1	1	6
2010	2	1	2	1	2	1	0	1	0	1	2	2	1	2	2	1	1	2	2	2	4	1	1	5
2010	2	1	2	3	2	1	0	1	0	2	2	2	2	2	2	5	0	2	2	2	4	1	1	1
2010	2	1	1	1	1	0	2	1	1	2	1	2	2	2	1	1	1	3	3	3	5	0	0	78
2010	2	2	2	1	2	0	0	2	0	2	2	2	1	2	2	1	1	1	1	2	1	1	1	57
2010	1	2	1	1	1	0	0	2	0	1	1	2	1	1	2	3	3	1	1	2	1	1	1	7
2010	1	1	2	1	1	0	0	1	0	2	1	2	2	2	1	1	1	1	1	2	1	1	1	18
2010	2	1	1	1	1	0	0	1	0	1	1	1	2	2	2	2	2	2	2	2	4	1	1	10
2010	2	1	2	1	2	1	2	2	1	1	2	2	1	2	2	1	1	2	2	1	3	1	1	20
2010	2	2	1	1	2	0	1	2	1	1	2	2	2	1	2	1	1	2	2	2	4	1	1	20
2010	2	1	2	1	1	0	2	1	1	1	2	2	2	2	2	5	0	2	2	1	3	0	1	46
2010	1	2	1	1	1	0	2	1	1	1	1	2	1	2	2	2	2	1	1	2	1	1	1	48
2010	2	1	1	3	2	1	2	1	1	2	2	2	1	2	2	1	1	1	2	3	5	0	1	1
2010	1	2	1	1	1	0	0	2	0	1	1	2	2	2	1	1	1	1	1	2	1	1	1	38
2010	2	1	1	3	1	0	0	1	0	1	2	2	1	2	2	1	1	1	1	1	2	0	0	77
2010	2	1	2	1	2	0	2	1	1	2	2	2	1	2	2	1	1	2	2	2	4	1	1	5
2010	2	1	1	1	2	0	0	1	0	2	1	2	2	2	1	1	1	1	1	2	1	0	0	39
2010	2	1	2	1	1	0	0	1	0	2	2	2	1	2	2	1	1	1	1	1	2	0	0	1
2010	1	1	2	1	2	0	0	1	0	1	1	1	1	1	2	4	4	2	2	1	3	1	1	11
2010	2	1	2	1	2	0	1	2	1	1	1	2	2	2	1	1	1	2	2	1	3	0	0	75
2010	1	1	2	1	1	0	2	2	1	1	2	1	2	2	2	1	1	2	2	1	3	1	1	66
2010	2	1	2	1	2	1	0	1	0	1	1	2	1	2	2	2	2	1	1	1	2	1	1	44
2010	2	1	2	3	2	0	0	1	0	2	1	1	1	1	2	4	4	3	3	3	5	1	1	0
2011	1	1	2	1	1	0	2	2	1	1	2	1	2	2	2	1	1	1	1	2	1	1	1	16
2010	2	1	1	1	1	0	1	2	1	1	1	2	1	2	2	2	2	1	1	2	1	0	0	74
2011	2	1	1	1	1	0	0	1	0	2	1	2	2	2	1	1	1	1	1	2	1	1	1	8
2010	2	1	1	1	1	0	0	1	0	1	1	2	2	2	1	1	1	1	1	2	1	1	1	45
2011	2	1	2	1	2	0	2	1	1	1	2	1	1	2	2	2	2	2	2	2	4	1	1	18
2010	1	1	2	1	2	1	2	2	1	1	2	2	2	2	2	5	0	2	2	3	5	1	1	30
2011	2	1	2	1	2	1	0	1	0	1	1	2	3	2	2	5	5	1	1	1	2	1	1	15
2010	1	1	2	1	2	0	0	1	0	1	1	2	2	2	1	1	1	1	1	2	1	1	1	34
2010	2	2	2	3	2	0	0	2	0	1	1	2	1	1	2	3	3	2	2	2	4	1	1	2
2011	1	3	1	1	1	0	0	1	0	2	1	2	2	2	1	1	1	1	1	2	1	1	1	20
2010	2	1	2	1	2	1	0	1	0	2	1	2	1	2	2	2	2	3	3	3	5	1	1	11
2010	2	1	1	1	2	1	0	1	0	2	1	2	2	2	1	1	1	1	1	2	1	1	1	34
2010	2	2	2	1	2	0	0	1	0	1	2	1	1	2	2	2	2	1	1	2	1	1	1	2
2010	1	1	3	2	2	1	2	1	1	1	1	2	2	2	1	1	1	1	1	3	5	0	0	80
2010	2	1	1	1	2	0	0	1	0	1	2	1	2	2	2	1	1	1	2	2	1	1	1	33
2010	1	1	1	1	1	0	1	2	1	1	1	2	2	2	1	1	1	1	1	2	1	0	0	74
2010	2	1	2	1	2	0	0	1	0	1	1	2	1	2	2	2	2	3	3	3	5	1	1	5
2010	2	1	2	1	1	0	2	1	1	1	2	2	2	2	2	5	0	1	1	1	2	0	0	74
2011	2	1	2	1	2	1	2	1	1	1	2	2	1	2	2	1	1	1	2	1	2	1	1	21
2011	1	1	2	2	2	0	2	2	1	1	1	2	2	2	1	1	1	1	1	2	1	0	0	69
2010	2	2	2	1	1	0	0	1	0	1	1	1	2	2	2	2	2	2	1	2	1	1	1	3
2011	1	1	2	1	2	0	2	2	1	1	1	2	2	2	1	1	1	1	1	1	2	0	0	69
2010	2	1	2	1	1	0	0	2	0	2	1	2	2	2	1	1	1	1	1	1	2	0	0	75
2011	1	1	2	1	2	0	1	2	1	1	1	2	2	2	1	1	1	2	2	2	4	0	0	67
2011	2	2	2	1	2	1	0	1	0	1	2	2	1	2	2	1	1	2	2	2	4	1	1	17
2010	2	1	1	1	2	0	2	1	1	1	2	2	2	2	2	5	0	1	1	2	1	0	1	54
2010	2	1	1	1	2	0	0	1	0	1	1	2	2	2	1	1	1	1	1	2	1	0	1	28
2011	2	2	2	1	1	0	0	1	0	1	1	2	2	2	1	1	1	2	2	2	4	0	1	2
2010	2	1	1	1	2	0	0	1	0	2	1	2	2	2	1	1	1	1	1	2	1	0	0	72
2010	2	1	1	2	1	1	2	1	1	2	1	2	2	2	1	1	1	1	1	2	1	0	0	73
2011	2	1	2	1	2	1	2	1	1	1	2	2	2	2	2	5	0	2	1	2	1	0	0	66
2011	2	1	1	1	1	0	2	1	1	1	2	1	2	2	2	1	1	2	2	2	4	1	1	27
2010	2	1	1	1	1	1	1	1	1	1	2	2	1	2	2	1	1	1	1	1	2	0	0	75
2010	2	1	2	1	2	0	0	1	0	1	2	2	1	2	2	1	1	2	2	2	4	1	1	15
2011	2	1	1	1	2	1	1	1	1	2	2	2	2	2	2	5	0	1	2	1	2	1	1	8
2010	1	2	2	1	2	1	0	1	0	1	2	1	1	2	2	2	2	2	2	1	3	1	1	48
2011	2	1	2	1	1	0	0	2	0	2	1	2	2	2	1	1	1	1	2	2	1	0	0	70
2011	2	1	2	1	1	1	1	1	1	1	2	2	1	2	2	1	1	2	2	1	3	1	1	70
2010	2	1	1	1	1	0	0	1	0	1	1	2	2	2	1	1	1	1	1	2	1	1	1	4
2011	2	1	3	1	2	0	2	2	1	1	2	2	1	2	2	1	1	1	1	2	1	0	0	69
2011	2	1	2	1	1	0	0	1	0	2	1	2	2	2	1	1	1	1	1	2	1	1	1	16
2011	1	1	1	1	1	0	0	1	0	1	1	2	2	2	1	1	1	1	1	2	1	0	0	68
2011	1	1	1	1	2	0	1	1	1	2	2	2	2	2	2	5	0	1	1	2	1	1	1	22
2011	2	1	2	1	2	0	0	1	0	1	2	1	2	2	2	1	1	2	2	1	3	1	1	2
2011	2	1	2	1	2	1	2	1	1	2	2	2	2	2	2	5	0	1	1	2	1	1	1	15
2011	1	1	1	1	2	0	0	1	0	1	1	2	2	2	1	1	1	1	1	2	1	1	1	41
2010	2	1	2	1	2	0	0	1	0	2	1	1	2	2	2	2	2	1	1	2	1	1	1	52
2010	2	1	2	1	2	0	0	1	0	2	1	2	2	2	1	1	1	1	1	2	1	1	1	1
2010	2	1	1	1	2	0	0	1	0	2	1	1	2	2	2	2	2	1	1	2	1	1	1	25
2011	2	1	2	1	1	1	1	1	1	1	1	1	1	2	2	3	3	1	1	1	2	0	0	69
2011	1	1	3	2	2	1	2	1	1	1	1	2	2	2	1	1	1	1	1	2	1	1	1	69
2011	1	1	1	1	1	0	0	1	0	1	1	2	2	2	1	1	1	1	1	2	1	0	0	69
2011	2	1	2	2	2	1	0	1	0	2	1	2	2	2	1	1	1	1	2	2	1	1	1	15
2011	2	1	1	3	2	0	0	2	0	2	1	2	2	2	1	1	1	1	1	2	1	1	1	44
2010	2	1	2	3	1	0	0	2	0	1	1	1	1	2	2	3	3	1	2	1	2	0	1	17
2011	2	1	2	1	2	0	0	1	0	1	2	1	2	2	2	1	1	3	3	3	5	1	1	16
2011	2	1	2	1	1	0	0	1	0	2	1	2	2	2	1	1	1	1	1	2	1	1	1	52
2011	2	2	2	1	2	0	0	1	0	1	2	1	2	2	2	1	1	1	1	2	1	1	1	11
2011	2	1	2	1	1	1	0	1	0	1	1	2	2	2	1	1	1	2	2	2	4	1	1	15
2011	2	2	1	1	2	1	0	1	0	2	1	2	2	2	1	1	1	1	1	2	1	1	1	49
2011	2	2	2	2	2	1	0	1	0	2	1	2	2	2	1	1	1	1	1	2	1	1	1	10
2011	2	2	2	1	2	0	0	1	0	1	2	1	2	2	2	1	1	2	2	2	4	1	1	15
2011	2	2	1	1	1	0	0	2	0	2	1	1	1	1	2	4	4	2	2	1	3	1	1	0
2011	2	1	1	1	2	0	2	2	1	2	1	2	1	2	2	2	2	1	1	2	1	0	0	66
2011	2	1	2	2	2	1	2	1	1	1	1	2	2	2	1	1	1	1	1	2	1	1	1	36
2011	1	1	2	1	1	0	0	1	0	1	2	2	2	2	2	5	0	1	1	2	1	1	1	25
2011	2	2	1	1	2	0	0	2	0	2	1	2	1	2	2	2	2	1	1	3	5	1	1	15
2011	2	2	2	2	1	0	0	1	0	1	1	1	2	2	2	2	2	1	1	2	1	0	0	68
2011	1	1	1	1	1	0	2	1	1	1	2	2	1	2	2	1	1	1	1	3	5	0	0	61
2011	2	1	1	1	1	0	2	2	1	1	1	2	2	2	1	1	1	1	2	1	2	0	1	17
2011	1	1	1	1	1	0	0	1	0	1	1	2	2	2	1	1	1	1	2	1	2	0	0	67
2011	2	1	3	1	1	0	2	1	1	1	2	1	2	2	2	1	1	2	2	1	3	0	0	67
2011	2	1	2	3	1	0	0	2	0	2	1	2	2	2	1	1	1	1	1	2	1	1	1	0
2011	2	1	1	1	2	1	0	1	0	1	1	2	1	2	2	2	2	1	1	2	1	0	0	64
2011	2	1	1	1	1	0	1	2	1	2	1	2	1	2	2	2	2	1	2	2	1	1	1	53
2011	1	1	1	1	1	1	2	1	1	1	1	2	2	2	1	1	1	1	1	2	1	0	0	62
2012	2	2	2	1	1	0	0	2	0	2	1	2	2	2	1	1	1	1	1	3	5	1	1	48
2011	2	1	2	1	2	1	0	1	0	1	2	2	1	2	2	1	1	2	2	1	3	1	1	1
2011	2	1	2	1	2	0	0	1	0	1	1	2	1	2	2	2	2	1	1	2	1	1	1	21
2011	2	1	1	1	1	0	0	1	0	2	1	2	2	2	1	1	1	1	1	2	1	0	1	7
2011	2	1	1	1	1	0	0	2	0	2	1	1	1	2	2	3	3	2	2	2	4	1	1	2
2011	2	1	3	1	1	0	1	1	1	1	2	2	1	2	2	1	1	1	2	2	1	0	0	64
2011	2	1	1	1	2	0	0	1	0	2	1	3	3	2	2	5	5	1	1	2	1	1	1	29
2011	2	1	2	1	2	1	0	1	0	1	1	2	2	2	1	1	1	1	1	2	1	0	0	61
2012	2	2	1	1	1	0	0	1	0	1	1	1	2	2	2	2	2	1	1	2	1	1	1	24
2011	2	1	2	1	2	0	0	1	0	1	1	1	1	2	2	3	3	1	2	1	2	1	1	28
2012	1	1	2	1	2	0	2	1	1	1	2	2	1	2	2	1	1	2	2	2	4	0	0	57
2011	2	1	1	1	2	0	0	1	0	1	1	2	1	2	2	2	2	1	1	2	1	1	1	37
2012	2	1	2	1	2	0	1	2	1	1	2	2	1	2	2	1	1	2	2	2	4	0	0	55
2012	2	2	2	1	2	0	0	1	0	1	1	2	1	2	2	2	2	2	1	2	1	1	1	18
2011	2	1	1	1	1	0	0	1	0	2	1	2	2	2	1	1	1	1	1	1	2	1	1	28
2011	1	1	2	1	1	0	1	1	1	1	1	2	2	2	1	1	1	1	1	2	1	1	1	45
2012	2	2	2	1	2	1	0	1	0	1	2	2	1	2	2	1	1	1	1	2	1	1	1	41
2011	1	3	1	1	1	0	2	1	1	1	1	2	2	2	1	1	1	1	2	2	1	1	1	42
2012	2	1	2	1	2	0	2	1	1	1	1	2	2	2	1	1	1	1	2	1	2	1	1	30
2012	2	1	1	3	1	0	1	1	1	1	2	1	2	2	2	1	1	2	2	2	4	0	1	4
2011	2	1	2	1	1	1	0	1	0	1	1	1	2	2	2	2	2	1	2	1	2	1	1	33
2011	1	1	2	1	2	0	2	2	1	1	1	2	2	2	1	1	1	1	1	2	1	0	0	68
2012	2	2	2	2	1	0	0	2	0	2	1	2	2	2	1	1	1	1	1	2	1	0	0	55
2011	2	1	2	1	1	0	0	2	0	2	1	2	1	2	2	2	2	1	2	2	1	1	1	4
2011	2	1	2	1	1	0	0	1	0	2	1	2	2	2	1	1	1	1	1	2	1	1	1	27
2011	2	1	2	1	1	0	2	1	1	2	1	2	2	2	1	1	1	1	1	2	1	0	0	61
2011	2	2	2	2	2	0	0	1	0	1	1	3	3	3	2	5	5	1	1	2	1	1	1	39
2011	2	1	1	2	1	1	2	1	1	2	1	2	2	2	1	1	1	1	1	2	1	1	1	62
2011	2	1	2	1	2	0	0	1	0	2	2	1	2	2	2	1	1	1	1	2	1	1	1	1
2012	1	2	2	1	2	0	0	1	0	1	2	2	2	2	2	5	0	1	1	2	1	1	1	10
2012	2	1	2	1	2	0	0	1	0	2	1	1	2	2	2	2	2	1	1	2	1	1	1	0
2012	2	2	1	1	2	0	0	1	0	1	1	2	1	2	2	2	2	1	1	1	2	0	0	57
2012	1	1	2	3	1	0	2	1	1	1	2	1	2	2	2	1	1	1	1	1	2	0	0	52
2012	2	1	2	1	2	1	0	1	0	1	1	2	1	2	2	2	2	2	2	1	3	0	1	1
2012	2	1	1	3	1	0	0	1	0	2	1	2	2	2	1	1	1	1	1	2	1	0	1	1
2012	2	1	1	2	2	1	2	2	1	2	1	2	2	2	1	1	1	1	1	2	1	1	1	41
2012	2	1	1	3	2	0	2	2	1	2	1	2	1	2	2	2	2	1	1	2	1	1	1	31
2012	1	1	2	1	2	1	2	1	1	1	2	1	2	2	2	1	1	2	2	2	4	1	1	16
2012	2	1	2	1	2	1	0	1	0	1	1	2	1	2	2	2	2	1	2	2	1	1	1	32
2012	2	1	2	1	2	1	0	1	0	1	2	1	1	2	2	2	2	2	2	1	3	1	1	25
2012	2	2	1	1	1	0	0	2	0	2	1	2	3	2	2	5	5	1	1	2	1	0	0	57
2012	2	1	1	1	1	0	0	1	0	1	2	2	2	2	2	5	0	1	2	2	1	1	1	16
2012	2	1	2	1	2	0	0	1	0	2	2	2	1	2	2	1	1	1	1	2	1	1	1	0
2012	2	1	1	1	1	0	0	1	0	2	1	2	2	2	1	1	1	1	1	2	1	0	0	56
2012	1	1	2	1	1	0	2	1	1	1	2	1	2	2	2	1	1	1	1	1	2	0	0	54
2012	2	1	1	1	2	0	0	1	0	1	2	2	1	2	2	1	1	1	2	2	1	0	0	48
2012	2	1	1	1	1	0	0	2	0	2	1	2	1	2	2	2	2	1	1	2	1	1	1	15
2012	2	1	1	1	1	0	1	1	1	2	2	1	2	2	2	1	1	2	2	2	4	1	1	0
2012	2	1	2	1	2	0	0	1	0	2	1	2	2	2	1	1	1	2	2	2	4	1	1	3
2012	2	1	1	2	2	1	0	1	0	2	1	2	2	2	1	1	1	1	2	2	1	1	1	2
2012	2	1	1	1	2	1	0	1	0	1	2	1	1	2	2	2	2	2	2	2	4	1	1	43
2012	2	1	2	1	2	0	2	1	1	2	2	2	1	2	2	1	1	2	2	2	4	1	1	3
2012	2	1	2	1	2	0	0	1	0	1	1	2	2	2	1	1	1	1	2	2	1	0	0	48
2012	2	2	2	1	2	1	0	1	0	1	2	1	1	2	2	2	2	2	2	2	4	1	1	12
2012	2	1	2	1	2	0	0	1	0	2	1	1	1	2	2	3	3	1	1	1	2	1	1	4
2012	2	1	2	3	2	0	2	2	1	1	2	2	2	2	2	5	0	2	2	1	3	0	0	58
2012	2	1	1	1	1	0	0	1	0	2	1	2	2	2	1	1	1	1	1	2	1	1	1	2
2012	2	3	1	1	1	1	0	2	0	2	1	2	2	2	1	1	1	1	1	3	5	0	0	3
2012	1	1	2	1	1	0	2	1	1	1	1	2	2	2	1	1	1	1	1	1	2	0	0	55
2012	2	2	2	1	2	0	0	1	0	1	1	1	2	2	2	2	2	1	2	1	2	0	0	50
2013	2	2	2	1	2	0	0	2	0	1	1	2	2	2	1	1	1	2	2	2	4	0	1	11
2012	2	1	2	1	2	0	0	1	0	2	2	1	2	2	2	1	1	2	2	1	3	1	1	1
2012	2	1	2	1	1	0	0	1	0	1	2	1	2	2	2	1	1	1	1	2	1	0	0	48
2012	2	1	2	2	1	0	0	1	0	2	1	2	2	2	1	1	1	1	1	2	1	1	1	5
2012	2	1	1	3	1	0	0	1	0	2	1	2	2	2	1	1	1	1	1	2	1	1	1	23
2012	2	1	2	1	2	0	0	1	0	2	2	1	2	2	2	1	1	2	2	2	4	1	1	1
2012	2	2	2	1	2	0	0	2	0	1	1	2	1	2	2	2	2	1	1	2	1	1	1	39
2013	2	2	2	1	1	0	0	1	0	1	1	1	2	2	2	2	2	1	1	1	2	0	0	45
2012	2	1	1	1	1	0	1	2	1	1	1	2	2	2	1	1	1	1	2	1	2	0	0	48
2012	2	1	1	1	2	1	2	1	1	2	1	2	1	2	2	2	2	1	1	1	2	1	1	0
2012	2	2	2	1	1	0	0	1	0	1	2	2	2	1	2	1	1	2	2	2	4	1	1	5
2012	2	1	2	1	1	1	0	1	0	2	2	2	2	1	2	1	1	2	2	2	4	1	1	2
2012	1	1	2	1	2	1	0	1	0	1	1	1	2	2	2	2	2	2	2	1	3	1	1	26
2012	2	1	1	1	1	0	0	1	0	1	1	2	2	2	1	1	1	3	3	3	5	1	1	18
2012	2	1	2	2	1	0	0	1	0	2	3	2	2	2	2	5	5	1	1	2	1	0	0	54
2012	2	1	1	3	2	1	0	1	0	2	1	2	2	2	1	1	1	1	1	3	5	1	1	0
2012	2	2	1	1	1	0	0	1	0	1	1	2	2	2	1	1	1	1	1	2	1	0	0	48
2013	1	2	2	1	2	0	0	2	0	1	2	2	2	1	2	1	1	2	2	1	3	1	1	18
2013	1	1	1	1	2	0	0	1	0	1	1	2	2	2	1	1	1	2	2	2	4	1	1	14
2013	2	3	3	3	1	0	1	2	1	1	1	2	2	2	1	1	1	1	1	2	1	0	0	46
2012	2	1	2	1	2	0	0	1	0	1	1	2	2	2	1	1	1	1	2	2	1	1	1	21
2013	2	1	1	1	1	0	0	1	0	1	2	2	1	2	2	1	1	1	1	2	1	0	0	43
2012	2	1	2	2	2	1	0	1	0	1	2	2	2	1	2	1	1	2	2	2	4	1	1	2
2012	2	1	2	1	2	0	2	2	1	1	2	1	2	2	2	1	1	2	1	1	2	1	1	52
2012	2	1	2	1	2	0	0	2	0	1	1	2	2	2	1	1	1	1	2	1	2	1	1	4
2012	2	1	2	1	2	0	2	1	1	1	2	2	2	2	2	5	0	2	2	2	4	1	1	6
2012	2	1	2	1	2	1	0	1	0	1	2	2	2	2	2	5	0	1	1	2	1	0	0	52
2012	2	1	2	1	2	1	0	1	0	1	1	1	2	2	2	2	2	2	2	2	4	1	1	11
2012	2	1	1	1	2	0	0	1	0	1	1	1	1	2	2	3	3	1	1	2	1	1	1	7
2013	2	1	1	2	1	0	1	1	1	1	2	1	2	2	2	1	1	1	2	2	1	1	1	7
2013	1	1	2	1	1	1	1	1	1	1	1	2	2	2	1	1	1	2	2	2	4	0	0	44
2012	2	1	1	1	2	0	2	1	1	1	1	2	2	2	1	1	1	1	1	2	1	0	0	51
2013	2	1	1	1	1	0	0	1	0	1	2	2	2	2	2	5	0	1	1	1	2	0	0	43
2013	2	1	2	3	1	0	0	1	0	2	2	2	1	2	2	1	1	1	2	1	2	0	0	44
2013	2	2	1	1	1	0	0	1	0	1	2	2	1	2	2	1	1	1	1	2	1	1	1	29
2013	2	1	2	1	2	0	0	1	0	2	1	2	2	2	1	1	1	1	1	2	1	1	1	23
2013	2	1	2	3	1	1	0	1	0	1	1	2	2	2	1	1	1	3	3	3	5	1	1	15
2013	1	1	2	1	2	0	2	1	1	1	1	1	2	3	2	5	5	1	1	1	2	0	0	45
2013	2	1	1	1	1	0	0	1	0	2	1	2	2	2	1	1	1	1	1	2	1	1	1	14
2013	2	1	1	1	1	0	0	1	0	2	1	2	1	2	2	2	2	1	1	3	5	1	1	2
2013	1	2	2	1	2	0	0	1	0	1	2	2	1	2	2	1	1	1	2	1	2	0	0	41
2013	2	3	1	1	2	0	2	2	1	1	1	2	2	2	1	1	1	1	1	2	1	0	0	42
2012	2	1	1	2	2	0	2	1	1	1	1	2	2	2	1	1	1	1	2	2	1	0	0	50
2013	1	1	1	1	2	0	2	2	1	1	1	2	2	2	1	1	1	1	1	1	2	0	0	39
2012	2	3	2	1	1	0	0	1	0	1	1	2	2	1	2	2	2	1	1	1	2	1	1	3
2013	2	1	2	1	2	1	2	2	1	1	1	2	2	2	1	1	1	2	2	2	4	1	1	21
2013	2	1	2	3	1	0	0	2	0	1	1	2	2	2	1	1	1	1	1	2	1	0	0	39
2012	2	1	2	3	2	1	0	1	0	2	2	2	2	2	2	5	0	1	1	2	1	1	1	0
2013	2	1	2	3	2	0	0	1	0	2	2	2	1	2	2	1	1	3	3	3	5	1	1	16
2013	1	1	1	1	2	0	0	1	0	2	1	2	2	2	1	1	1	1	1	2	1	0	0	40
2013	2	2	3	1	2	0	0	1	0	2	1	1	1	2	2	3	3	3	3	3	5	1	1	0
2013	2	1	2	3	2	0	2	1	1	2	1	3	3	3	2	5	5	1	1	2	1	0	1	13
2013	2	1	1	1	2	1	0	1	0	1	1	1	2	2	2	2	2	2	2	2	4	1	1	6
2013	2	1	3	1	1	0	0	1	0	2	1	2	2	2	1	1	1	1	1	3	5	0	0	43
2013	1	1	2	1	2	0	0	1	0	2	1	2	2	2	1	1	1	1	1	2	1	1	1	1
2013	2	1	2	1	2	0	1	1	1	2	1	2	2	2	1	1	1	1	1	2	1	0	1	20
2013	2	2	2	1	2	0	0	1	0	2	1	2	2	2	1	1	1	1	1	2	1	1	1	3
2013	1	1	2	1	2	1	2	1	1	1	1	2	2	2	1	1	1	1	1	2	1	0	0	41
2013	1	3	1	1	2	1	2	2	1	1	1	2	2	2	1	1	1	1	1	2	1	0	0	34
2013	2	1	1	1	1	0	1	2	1	2	2	2	2	2	2	5	0	1	1	2	1	0	1	4
2013	2	1	1	3	2	0	2	2	1	1	1	2	1	1	2	3	3	1	1	2	1	1	1	41
2013	2	1	1	2	1	1	0	1	0	2	1	1	2	2	2	2	2	1	1	2	1	0	0	38
2013	2	1	2	1	1	0	0	1	0	2	1	2	2	2	1	1	1	1	2	2	1	1	1	20
2013	2	1	2	1	2	0	2	2	1	2	1	1	1	2	2	3	3	2	2	2	4	1	1	10
2013	2	1	3	1	2	0	0	1	0	1	1	2	2	2	1	1	1	2	2	2	4	1	1	10
2013	2	1	1	1	1	0	0	1	0	2	2	1	2	2	2	1	1	1	2	2	1	1	1	32
2013	1	1	1	1	1	0	2	1	1	2	2	2	1	2	2	1	1	1	1	2	1	0	0	37
2014	2	2	2	1	1	0	0	1	0	1	1	1	1	2	2	3	3	2	2	2	4	1	1	10
2013	2	1	1	3	2	1	2	1	1	2	1	2	2	2	1	1	1	1	1	2	1	1	1	32
2013	2	2	3	1	2	0	0	1	0	2	1	2	3	2	2	5	5	2	1	2	1	1	1	0
2013	2	1	1	1	2	1	2	1	1	2	2	2	2	2	2	5	0	1	1	2	1	0	0	38
2013	1	1	1	1	1	0	0	2	0	2	1	1	1	2	2	3	3	1	1	2	1	1	1	28
2013	1	1	1	1	1	0	0	1	0	1	1	1	2	2	2	2	2	2	2	2	4	1	1	6
2013	1	2	1	1	2	0	0	1	0	1	2	2	1	2	2	1	1	1	1	2	1	0	0	37
2013	2	1	2	1	1	0	2	1	1	2	1	2	2	2	1	1	1	1	1	2	1	0	0	36
2013	2	1	1	2	2	0	0	1	0	2	1	1	1	1	2	4	4	1	1	2	1	1	1	0
2013	2	1	1	1	2	0	2	1	1	1	2	1	2	2	2	1	1	2	2	1	3	0	0	36
2013	2	2	2	1	1	0	0	2	0	2	1	2	2	2	1	1	1	1	1	2	1	0	0	39
2013	2	1	1	1	2	0	0	1	0	1	1	1	1	2	2	3	3	2	2	1	3	0	0	41
2013	2	1	1	1	2	0	0	2	0	1	1	1	1	2	2	3	3	1	1	2	1	1	1	3
2013	2	1	1	1	1	0	1	1	1	2	1	1	1	2	2	3	3	1	1	2	1	0	0	44
2013	2	1	2	1	2	0	0	1	0	1	1	2	2	2	1	1	1	1	1	1	2	1	1	11
2014	2	2	1	1	2	1	0	1	0	1	1	2	1	2	2	2	2	1	1	2	1	0	0	34
2013	2	1	3	1	1	0	0	1	0	1	2	1	2	2	2	1	1	2	2	1	3	0	0	39
2013	2	1	1	1	2	0	1	1	1	2	1	2	2	2	1	1	1	1	1	2	1	1	1	8
2013	2	1	1	1	1	0	0	2	0	2	1	2	2	2	1	1	1	1	1	2	1	0	0	36
2013	2	1	1	1	1	0	0	1	0	2	1	1	1	2	2	3	3	1	1	2	1	0	1	17
2014	2	1	2	2	1	0	1	1	1	2	2	1	2	2	2	1	1	2	2	2	4	1	1	31
2013	2	2	3	3	2	0	0	2	0	2	1	2	2	2	1	1	1	1	1	3	5	1	1	8
2013	2	1	1	1	1	1	2	1	1	2	2	1	2	2	2	1	1	1	1	2	1	0	1	4
2014	1	2	2	1	2	1	0	1	0	1	1	1	2	2	2	2	2	1	1	2	1	1	1	18
2014	2	1	1	1	2	0	2	1	1	2	1	1	1	2	2	3	3	1	1	2	1	0	0	33
2014	2	1	1	3	1	0	1	1	1	1	1	1	2	2	2	2	2	1	2	2	1	0	0	32
2013	2	2	3	1	2	1	2	2	1	1	2	2	1	2	2	1	1	2	2	2	4	1	1	14
2013	2	1	3	3	2	1	0	2	0	1	2	2	2	2	2	5	0	3	3	3	5	0	0	36
2013	2	1	3	1	1	0	0	1	0	1	1	1	2	2	2	2	2	2	2	1	3	1	1	4
2013	2	2	2	1	2	1	0	1	0	2	1	2	2	2	1	1	1	1	1	1	2	1	1	44
2014	2	1	1	1	1	0	0	1	0	1	2	2	1	2	2	1	1	2	1	1	2	0	0	35
2013	2	1	1	1	2	0	2	1	1	1	1	2	2	2	1	1	1	1	1	1	2	1	1	41
2014	2	2	1	1	2	0	2	2	1	1	1	1	2	2	2	2	2	1	1	2	1	1	1	26
2014	1	1	2	1	2	0	0	1	0	2	3	3	3	3	2	5	5	1	1	2	1	1	1	1
2013	2	2	2	1	2	1	0	1	0	1	1	1	1	2	2	3	3	2	2	1	3	1	1	2
2013	2	1	2	1	1	0	0	1	0	2	1	2	2	2	1	1	1	1	1	2	1	1	1	28
2013	2	2	2	1	2	0	2	1	1	2	2	2	1	2	2	1	1	1	1	2	1	0	1	3
2014	2	1	2	1	2	0	0	1	0	1	1	1	2	2	2	2	2	1	1	2	1	0	0	32
2014	1	2	2	1	2	1	0	1	0	1	2	2	2	2	2	5	0	2	2	2	4	1	1	8
2014	2	2	2	1	1	0	1	1	1	1	1	2	2	2	1	1	1	2	2	2	4	1	1	10
2013	2	2	3	3	2	1	2	2	1	1	1	2	2	2	1	1	1	1	1	2	1	0	0	44
2014	2	2	1	1	2	0	0	2	0	1	1	2	2	1	2	2	2	1	1	1	2	1	1	2
2014	2	1	3	3	2	1	0	1	0	2	1	2	2	2	1	1	1	3	3	3	5	1	1	12
2014	1	1	1	1	2	0	0	2	0	1	1	2	2	2	1	1	1	1	1	2	1	1	1	21
2014	1	1	1	1	1	0	0	1	0	2	1	2	2	2	1	1	1	1	1	2	1	0	0	33
2014	2	1	1	1	2	1	2	1	1	2	3	3	3	3	2	5	5	1	2	1	2	1	1	3
2014	2	1	3	3	1	0	0	1	0	1	1	2	3	2	2	5	5	1	1	2	1	0	0	32
2014	2	1	1	1	1	1	0	2	0	1	1	2	2	2	1	1	1	1	1	2	1	1	1	19
2014	2	1	2	1	2	0	2	1	1	1	2	1	1	2	2	2	2	2	2	2	4	1	1	28
2014	2	1	2	1	2	1	0	1	0	1	2	2	1	2	2	1	1	2	2	2	4	1	1	1
2014	2	2	3	2	2	0	2	2	1	1	1	2	2	2	1	1	1	2	1	1	2	1	1	11
2014	2	1	2	1	1	0	0	1	0	1	2	2	1	2	2	1	1	2	2	1	3	0	0	32
2014	2	1	2	1	2	0	0	1	0	1	2	2	1	2	2	1	1	2	2	2	4	1	1	9
2014	2	2	2	3	2	0	2	1	1	1	3	1	1	3	2	5	5	2	2	2	4	1	1	7
2014	1	1	2	1	1	0	0	1	0	1	2	1	2	2	2	1	1	2	2	2	4	0	0	32
2014	1	1	2	1	2	0	2	2	1	1	2	2	1	2	2	1	1	2	2	1	3	0	0	32
2014	2	1	2	1	2	1	2	1	1	1	1	1	2	2	2	2	2	2	2	2	4	1	1	6
2014	2	2	1	1	1	0	2	1	1	1	2	2	1	2	2	1	1	1	1	2	1	0	0	32
2014	2	1	2	3	1	0	1	1	1	1	2	1	2	2	2	1	1	2	2	2	4	0	0	29
2014	2	1	2	1	2	0	0	2	0	1	2	2	1	2	2	1	1	2	2	2	4	0	0	28
2014	2	1	3	3	2	0	2	2	1	1	2	2	2	2	2	5	0	2	3	3	5	1	1	22
2014	1	1	3	2	1	0	1	2	1	2	1	2	2	2	1	1	1	1	1	2	1	0	0	30
2014	2	2	3	2	1	0	0	2	0	2	1	2	2	2	1	1	1	1	1	2	1	1	1	9
2014	2	1	1	1	2	1	2	1	1	2	2	1	1	2	2	2	2	1	1	2	1	0	0	27
2014	2	2	2	1	2	0	2	1	1	2	1	2	2	2	1	1	1	1	2	2	1	0	0	34
2014	2	1	1	1	1	0	0	1	0	2	1	2	2	2	1	1	1	1	1	2	1	0	0	33
2014	2	1	1	1	1	1	0	1	0	2	1	1	1	2	2	3	3	1	1	2	1	0	0	28
2014	2	1	1	2	1	0	0	1	0	2	1	2	2	2	1	1	1	1	1	2	1	1	1	0
2014	2	1	3	1	2	0	0	1	0	1	2	2	1	2	2	1	1	2	2	2	4	1	1	2
2014	2	1	1	3	1	0	2	1	1	1	2	2	2	2	2	5	0	1	1	2	1	0	0	28
2014	2	1	1	1	1	0	0	1	0	2	1	2	2	2	1	1	1	1	1	2	1	1	1	0
2014	1	2	1	1	1	0	1	1	1	1	2	2	2	2	2	5	0	1	1	2	1	0	0	26
2014	1	2	1	1	1	0	2	1	1	2	2	2	1	2	2	1	1	1	1	2	1	0	0	33
2014	2	1	2	1	1	1	1	1	1	1	2	1	2	2	2	1	1	2	2	2	4	1	1	2
2014	2	2	2	1	1	0	0	1	0	2	2	1	2	2	2	1	1	1	2	2	1	1	1	1
2014	1	2	2	1	1	0	0	2	0	2	1	2	2	2	1	1	1	1	1	2	1	1	1	16
2014	2	1	3	1	2	0	0	1	0	2	2	2	2	2	2	5	0	1	1	2	1	0	0	27
2014	2	2	2	1	2	1	0	1	0	1	2	2	1	2	2	1	1	2	2	2	4	1	1	4
2014	1	2	2	1	2	1	0	1	0	1	2	1	2	2	2	1	1	2	2	2	4	1	1	15
2014	2	1	1	1	1	0	1	1	1	1	1	1	2	2	2	2	2	1	1	2	1	1	1	22
2015	1	1	2	3	1	1	2	1	1	1	2	2	1	2	2	1	1	2	2	1	3	0	0	22
2015	2	1	2	1	1	0	0	1	0	1	2	2	1	2	2	1	1	2	2	1	3	0	0	21
2014	2	2	2	1	1	1	0	1	0	1	1	2	2	1	2	2	2	2	1	2	1	1	1	10
2015	2	1	1	1	1	0	0	2	0	2	1	2	2	2	1	1	1	1	1	2	1	1	1	16
2015	2	1	1	2	1	1	2	1	1	2	2	1	2	2	2	1	1	1	1	2	1	0	0	21
2015	2	1	1	1	1	0	0	1	0	1	1	2	2	2	1	1	1	2	2	1	3	1	1	20
2015	2	2	1	3	1	0	1	2	1	1	1	2	2	2	1	1	1	1	1	2	1	0	0	20
2015	2	2	3	1	2	1	0	1	0	2	2	2	1	2	2	1	1	1	1	2	1	0	1	9
2015	2	2	3	3	1	0	0	1	0	2	1	2	2	2	1	1	1	1	1	2	1	0	0	20
2015	1	1	2	1	1	1	2	2	1	2	1	2	2	2	1	1	1	1	1	2	1	0	0	22
2013	2	1	2	1	2	0	0	1	0	1	1	2	2	2	1	1	1	2	2	1	3	0	0	39
2015	2	2	2	1	2	0	2	1	1	1	2	2	1	2	2	1	1	1	2	1	2	0	0	21
2013	2	1	3	3	1	0	0	1	0	1	2	2	1	2	2	1	1	1	1	2	1	0	0	37
2013	1	1	2	1	2	1	0	1	0	2	1	1	2	2	2	2	2	2	2	2	4	1	1	2
2014	2	1	2	1	2	0	0	2	0	1	1	1	1	2	2	3	3	1	1	2	1	1	1	6
2015	2	1	2	1	2	0	0	1	0	1	1	2	1	2	2	2	2	1	1	1	2	0	0	20
2015	2	2	2	1	2	0	0	1	0	2	2	2	1	2	2	1	1	1	2	1	2	0	0	21
2015	1	1	2	1	2	0	0	1	0	1	1	1	2	2	2	2	2	2	2	1	3	0	0	17
2015	2	1	1	1	2	1	0	1	0	1	1	2	2	2	1	1	1	2	2	2	4	1	1	11
2015	2	1	2	1	1	0	0	1	0	2	2	2	1	2	2	1	1	2	2	1	3	1	1	1
2015	2	1	1	1	1	0	0	2	0	2	1	2	1	1	2	3	3	1	1	2	1	1	1	1
2015	1	1	3	1	1	1	0	1	0	1	1	1	2	2	2	2	2	1	1	2	1	1	1	10
2015	1	1	2	1	2	0	0	2	0	1	1	2	2	2	1	1	1	1	1	1	2	0	0	19
2014	1	1	1	1	1	0	0	1	0	2	1	2	2	2	1	1	1	1	1	2	1	0	0	25
2015	2	1	2	1	2	0	2	1	1	1	1	1	2	2	2	2	2	1	1	2	1	1	1	9
2015	2	1	1	1	1	0	0	1	0	1	1	1	2	2	2	2	2	2	2	2	4	0	0	17
2015	2	2	2	1	2	0	1	1	1	1	1	2	2	2	1	1	1	2	2	1	3	0	0	17
2015	2	1	2	1	2	0	0	1	0	1	2	1	2	2	2	1	1	2	2	2	4	1	1	14
2015	2	2	2	1	2	1	0	1	0	1	2	2	2	2	2	5	0	2	2	1	3	1	1	8
2015	2	2	2	1	1	0	0	1	0	1	1	2	2	2	1	1	1	2	2	2	4	1	1	7
2015	1	3	2	1	2	1	0	1	0	1	1	2	1	2	2	2	2	1	1	1	2	0	0	15
2015	2	1	2	1	1	0	0	1	0	1	1	2	2	2	1	1	1	1	1	1	2	0	0	14
2015	2	1	2	1	2	1	0	2	0	1	1	1	1	2	2	3	3	2	2	2	4	1	1	12
2015	2	2	2	1	1	0	1	1	1	1	2	2	2	2	2	5	0	1	2	2	1	0	0	15
2015	2	1	2	1	2	0	0	1	0	1	1	1	1	2	2	3	3	2	2	2	4	0	0	15
2015	1	2	1	1	1	0	0	1	0	2	1	2	2	2	1	1	1	1	1	2	1	0	0	19
2015	1	1	2	1	2	0	0	1	0	2	2	1	1	2	2	2	2	2	2	2	4	1	1	0
2015	2	1	2	1	1	1	0	1	0	1	1	2	2	2	1	1	1	2	2	2	4	1	1	8
2015	2	1	1	1	1	0	0	1	0	1	2	2	2	2	2	5	0	1	1	2	1	0	0	19
2015	2	2	1	1	1	0	0	1	0	1	1	2	2	2	1	1	1	1	1	3	5	0	0	18
2015	2	2	2	3	2	0	2	2	1	1	2	2	1	2	2	1	1	2	2	1	3	0	0	14
2015	2	1	2	1	1	1	0	1	0	1	2	2	1	2	2	1	1	1	1	2	1	0	0	22
2015	2	2	1	1	2	0	0	1	0	1	1	1	2	2	2	2	2	1	1	2	1	0	0	14
2015	2	2	1	1	2	0	0	1	0	2	2	2	1	2	2	1	1	1	2	2	1	0	1	2
2015	2	1	2	1	1	0	0	2	0	2	1	2	2	1	2	2	2	1	1	2	1	0	0	18
2015	1	3	2	3	1	0	1	2	1	1	2	2	1	2	2	1	1	2	2	1	3	0	0	15
2015	2	2	1	1	1	0	2	1	1	1	2	2	1	2	2	1	1	1	2	2	1	0	0	14
2015	2	1	1	1	1	0	0	1	0	1	2	2	2	2	2	5	0	1	1	2	1	0	0	14
2015	2	2	2	1	1	0	1	1	1	1	2	2	2	2	2	5	0	2	2	2	4	0	0	13
2015	2	1	2	1	2	1	0	1	0	2	1	2	1	2	2	2	2	1	1	2	1	0	0	14
2015	2	2	2	1	1	0	0	1	0	1	1	1	2	2	2	2	2	2	2	2	4	0	0	17
2015	2	1	1	2	1	0	0	1	0	2	2	2	2	2	2	5	0	1	2	2	1	0	0	17
2015	2	1	2	3	2	0	0	1	0	1	2	2	2	2	2	5	0	3	3	3	5	1	1	2
2015	2	1	1	2	2	0	1	1	1	1	2	2	2	2	2	5	0	1	2	2	1	0	0	12
2015	1	1	1	2	1	1	2	1	1	1	1	2	2	2	1	1	1	1	1	1	2	0	0	17
2015	2	2	3	3	1	0	0	1	0	1	2	2	2	2	2	5	0	1	1	2	1	0	0	18
2015	2	2	1	1	2	1	0	1	0	2	1	2	1	1	2	3	3	1	1	1	2	1	1	3
2015	2	1	3	1	1	0	0	2	0	2	1	1	2	1	2	3	3	1	2	2	1	0	0	12
2015	2	1	2	1	2	0	0	1	0	1	1	1	1	1	2	4	4	3	3	3	5	1	1	2
2015	2	1	1	1	1	0	0	1	0	2	2	2	1	2	2	1	1	1	1	2	1	0	0	13
2015	2	1	1	1	1	0	0	1	0	2	1	2	2	2	1	1	1	1	2	1	2	0	0	14
2015	2	2	2	1	2	0	0	1	0	1	1	2	2	2	1	1	1	2	2	2	4	1	1	4
2015	2	2	1	1	1	0	1	1	1	1	1	2	2	2	1	1	1	1	1	2	1	1	1	15
2015	2	1	1	1	1	0	0	1	0	1	1	2	2	2	1	1	1	1	1	1	2	0	0	22
2015	2	1	1	1	1	0	0	1	0	1	1	2	2	2	1	1	1	1	1	1	2	0	0	14
2014	2	1	3	3	1	0	0	1	0	2	1	2	2	2	1	1	1	1	1	2	1	1	1	24
2011	2	3	2	1	2	1	2	1	1	2	1	2	2	2	1	1	1	1	1	2	1	0	1	0
2010	2	3	3	1	2	1	0	1	0	1	1	2	2	1	2	2	2	1	1	1	2	1	1	21
2011	2	1	2	1	1	1	0	1	0	2	1	2	2	2	1	1	1	1	1	2	1	1	1	1
2010	1	3	2	1	1	1	0	1	0	1	1	2	2	2	1	1	1	2	2	2	4	1	1	29
2010	1	3	2	1	2	0	0	1	0	2	1	2	2	2	1	1	1	1	1	2	1	1	1	33
2010	1	3	3	1	2	1	0	1	0	2	1	2	2	2	1	1	1	1	1	1	2	1	1	18
2010	2	3	2	1	1	0	2	1	1	1	2	2	2	2	2	5	0	1	1	2	1	0	0	81
2010	1	3	3	1	1	0	0	2	0	2	1	2	1	2	2	2	2	1	1	2	1	0	0	73
2010	2	1	2	1	2	1	0	2	0	1	1	2	2	2	1	1	1	1	1	2	1	0	1	17
2010	1	3	2	1	2	0	0	1	0	1	1	1	2	2	2	2	2	1	1	2	1	1	1	22
2010	2	3	2	1	2	0	2	1	1	1	1	2	1	3	2	5	5	1	1	2	1	0	0	73
2010	2	1	1	2	1	1	2	2	1	1	2	1	2	2	2	1	1	1	1	2	1	1	1	56
2010	1	3	3	3	1	0	0	1	0	1	1	2	2	2	1	1	1	1	1	2	1	1	1	51
2010	1	2	2	1	2	1	0	1	0	1	1	1	2	2	2	2	2	2	2	2	4	1	1	12
2010	2	3	2	1	2	0	2	1	1	2	2	2	1	2	2	1	1	2	2	2	4	1	1	20
2010	1	3	2	3	2	0	2	2	1	1	1	1	1	2	2	3	3	1	1	1	2	0	0	78
2011	2	3	3	1	1	0	0	1	0	2	2	2	1	2	2	1	1	2	2	2	4	1	1	22
2011	2	1	2	1	2	1	1	2	1	2	1	1	1	3	2	5	5	2	2	1	3	1	1	22
2011	2	3	2	1	1	0	0	1	0	1	1	1	2	2	2	2	2	2	2	2	4	1	1	4
2011	2	3	2	1	2	1	2	1	1	1	2	2	1	2	2	1	1	1	2	1	2	0	0	68
2011	2	1	2	1	2	0	2	1	1	1	2	1	2	2	2	1	1	1	2	1	2	1	1	1
2011	2	3	3	2	1	1	2	2	1	2	3	3	3	3	2	5	5	1	1	2	1	0	0	58
2012	1	3	3	1	1	1	0	2	0	1	2	2	1	2	2	1	1	2	2	2	4	0	0	59
2012	2	3	1	1	1	0	0	1	0	2	2	1	2	2	2	1	1	1	2	2	1	1	1	1
2012	2	3	2	1	2	0	2	1	1	1	1	1	1	3	2	5	5	1	1	1	2	0	0	8
2012	1	3	1	1	1	0	0	1	0	1	1	2	2	2	1	1	1	1	1	2	1	1	1	42
2012	2	3	1	1	2	1	0	1	0	1	1	1	1	1	2	4	4	1	1	1	2	1	1	2
2012	2	1	1	1	1	1	2	1	1	2	1	2	2	2	1	1	1	1	2	2	1	1	1	46
2012	2	1	1	2	1	1	1	1	1	2	1	2	2	2	1	1	1	1	1	2	1	1	1	20
2013	2	3	2	1	1	0	1	1	1	1	2	1	2	2	2	1	1	2	2	1	3	1	1	5
2012	2	3	1	3	2	0	2	1	1	1	2	1	2	2	2	1	1	1	2	2	1	1	1	7
2012	2	3	2	1	2	1	2	1	1	1	1	2	2	2	1	1	1	2	2	1	3	0	0	53
2012	2	3	2	1	2	0	0	1	0	1	1	1	2	1	2	3	3	1	1	2	1	1	1	20
2012	1	3	1	1	1	0	2	1	1	2	1	2	2	2	1	1	1	1	1	2	1	0	0	50
2012	2	3	2	3	2	0	2	2	1	1	2	1	2	2	2	1	1	1	1	2	1	1	1	20
2013	1	1	3	1	1	0	0	1	0	2	1	2	2	2	1	1	1	1	1	2	1	0	0	43
2012	2	1	3	1	2	1	0	1	0	1	1	2	1	2	2	2	2	1	1	1	2	1	1	23
2012	2	1	1	1	2	0	2	1	1	2	1	2	2	2	1	1	1	1	2	2	1	0	0	50
2012	2	3	1	1	2	0	0	1	0	1	1	2	1	2	2	2	2	1	1	2	1	1	1	38
2012	2	3	1	1	2	1	2	2	1	2	2	2	2	2	2	5	0	1	1	2	1	0	0	51
2013	2	3	2	1	2	0	2	1	1	2	2	1	2	2	2	1	1	1	1	2	1	0	0	40
2013	2	3	1	1	1	0	0	1	0	1	2	2	1	2	2	1	1	2	2	1	3	1	1	12
2013	2	2	2	1	2	1	0	2	0	1	1	1	2	2	2	2	2	2	2	2	4	1	1	9
2013	2	3	2	1	1	1	2	1	1	2	1	2	2	2	1	1	1	1	1	2	1	0	0	42
2013	2	1	2	1	2	0	2	1	1	2	1	2	1	3	2	5	5	1	2	2	1	1	1	5
2014	2	3	2	1	2	0	2	1	1	1	1	2	1	2	2	2	2	2	2	2	4	1	1	2
2014	2	1	1	2	2	1	1	1	1	2	2	2	1	2	2	1	1	1	2	2	1	0	0	31
2013	2	1	2	1	2	1	0	1	0	2	1	2	1	2	2	2	2	1	1	1	2	0	1	5
2013	2	1	1	1	1	0	0	1	0	2	1	2	2	2	1	1	1	1	2	2	1	1	1	7
2013	2	1	1	2	2	0	2	1	1	2	2	2	2	2	2	5	0	1	2	2	1	0	0	39
2014	2	3	3	1	2	0	0	1	0	2	2	2	1	2	2	1	1	2	2	2	4	0	1	3
2014	2	3	1	1	1	0	1	1	1	2	1	2	2	2	1	1	1	1	2	2	1	0	0	29
2013	2	3	3	1	2	1	2	1	1	2	2	2	1	2	2	1	1	1	1	2	1	0	0	40
2014	2	1	1	1	2	0	0	1	0	2	2	1	2	2	2	1	1	2	2	1	3	1	1	1
2014	2	1	3	1	2	1	0	1	0	1	1	1	2	2	2	2	2	1	1	2	1	1	1	7
2014	2	3	1	1	2	1	0	1	0	2	1	3	1	2	2	5	5	1	1	2	1	1	1	0
2014	2	3	1	1	2	0	2	1	1	1	2	2	1	2	2	1	1	1	1	1	2	0	0	31
2014	2	3	2	1	2	1	2	1	1	2	2	2	1	2	2	1	1	2	2	2	4	1	1	11
2014	2	1	1	1	1	0	2	1	1	2	2	2	2	2	2	5	0	1	1	2	1	0	0	34
2014	2	3	1	1	1	0	0	1	0	1	2	1	2	2	2	1	1	1	1	2	1	0	0	4
2015	2	3	1	2	1	1	1	1	1	1	1	2	2	2	1	1	1	1	1	2	1	0	0	21
2015	1	1	1	1	1	0	2	1	1	1	1	2	2	2	1	1	1	1	1	1	2	0	0	23
2015	2	3	2	1	2	1	2	1	1	1	1	1	2	2	2	2	2	1	1	1	2	0	0	20
2015	2	3	3	3	1	0	0	2	0	2	1	2	2	2	1	1	1	1	1	1	2	1	1	21
2015	1	1	2	1	1	0	2	1	1	1	2	1	2	2	2	1	1	1	2	1	2	0	0	17
2014	2	3	2	1	2	1	0	1	0	2	1	2	3	2	2	5	5	1	1	1	2	1	1	1
2014	2	1	2	1	2	1	0	1	0	2	3	3	3	3	2	5	5	1	2	2	1	1	1	11
2015	2	3	1	1	2	0	0	1	0	1	1	2	1	2	2	2	2	1	1	2	1	0	0	17
2014	2	3	2	1	2	0	2	2	1	1	2	2	2	1	2	1	1	1	1	1	2	1	1	29
2015	1	3	2	1	1	1	0	1	0	1	1	2	2	2	1	1	1	1	1	2	1	0	0	14
2015	2	3	1	3	2	1	2	2	1	1	2	2	2	2	2	5	0	1	1	2	1	0	0	18
2015	2	1	1	2	1	0	2	1	1	2	2	2	2	2	2	5	0	1	1	2	1	0	0	21
2015	1	1	2	1	1	0	0	1	0	1	2	2	1	2	2	1	1	1	1	1	2	0	0	14
2015	2	3	2	1	2	1	2	1	1	2	1	2	2	2	1	1	1	1	1	2	1	1	1	11
2015	2	3	1	1	2	0	2	2	1	1	1	2	2	2	1	1	1	1	2	2	1	0	0	15
2010	2	1	1	1	1	0	1	1	1	1	2	2	1	2	2	1	1	2	2	1	3	1	1	22
2010	1	1	1	3	2	0	2	2	1	1	1	2	2	2	1	1	1	1	1	2	1	0	0	82
2010	2	1	1	3	2	1	2	2	1	2	1	2	2	2	1	1	1	1	1	2	1	1	1	79
2010	2	1	2	1	1	0	0	1	0	1	2	1	3	2	2	5	5	1	2	2	1	1	1	1
2010	2	1	2	1	2	1	2	1	1	1	1	2	2	2	1	1	1	2	2	2	4	1	1	29
2010	2	1	1	3	1	0	0	1	0	2	1	2	2	2	1	1	1	1	1	2	1	1	1	38
2010	2	1	2	1	1	1	2	1	1	2	2	2	2	2	2	5	0	1	2	2	1	0	0	74
2010	1	1	2	1	2	0	0	1	0	1	1	2	2	2	1	1	1	1	1	1	2	0	0	75
2010	1	1	1	1	1	0	0	1	0	1	1	1	2	2	2	2	2	1	1	2	1	0	0	78
2010	1	1	2	1	2	0	2	1	1	1	2	1	2	2	2	1	1	2	2	2	4	1	1	13
2010	2	1	1	3	1	0	2	1	1	1	1	2	2	2	1	1	1	1	1	2	1	1	1	44
2010	2	1	2	1	2	0	0	2	0	1	1	2	1	1	2	3	3	2	2	2	4	1	1	19
2010	2	1	2	3	2	0	2	1	1	1	2	2	2	2	2	5	0	1	1	2	1	0	1	20
2010	2	1	3	3	2	0	0	1	0	1	1	2	2	2	1	1	1	1	2	2	1	1	1	22
2010	2	1	2	3	2	0	0	1	0	1	3	3	1	3	2	5	5	2	2	2	4	1	1	1
2010	1	1	2	1	1	0	0	1	0	1	2	2	2	2	2	5	0	2	2	2	4	1	1	10
2010	2	1	2	1	1	1	1	1	1	1	2	1	2	2	2	1	1	2	2	3	5	1	1	36
2010	2	1	2	3	2	0	0	1	0	1	1	1	2	2	2	2	2	2	2	2	4	1	1	17
2010	2	2	1	1	2	1	2	2	1	1	2	2	2	2	2	5	0	1	2	1	2	0	1	72
2010	2	1	2	1	2	1	0	1	0	1	2	2	2	2	2	5	0	1	2	2	1	1	1	11
2010	1	1	2	1	2	0	2	1	1	1	1	1	2	2	2	2	2	2	2	1	3	1	1	62
2010	1	1	2	1	2	1	2	1	1	1	2	2	2	2	2	5	0	2	2	2	4	1	1	12
2010	1	1	2	1	2	1	0	1	0	1	2	2	1	2	2	1	1	1	1	2	1	0	0	72
2010	2	1	1	1	1	1	1	1	1	2	1	2	2	2	1	1	1	1	1	2	1	1	1	28
2010	2	1	1	1	2	0	0	2	0	1	1	1	1	2	2	3	3	2	2	1	3	1	1	9
2010	2	1	1	1	2	0	2	1	1	1	1	2	2	2	1	1	1	1	1	2	1	0	0	75
2010	2	1	2	1	2	1	2	1	1	1	2	1	2	2	2	1	1	2	2	2	4	1	1	5
2010	2	1	2	1	1	1	1	1	1	1	1	1	2	2	2	2	2	1	1	2	1	1	1	14
2010	2	2	1	1	2	0	2	2	1	1	1	2	2	2	1	1	1	1	1	2	1	0	0	74
2010	2	1	2	1	2	0	2	1	1	1	2	1	2	2	2	1	1	2	2	1	3	1	1	28
2010	2	1	1	1	2	0	0	2	0	2	1	2	2	2	1	1	1	1	1	2	1	0	0	72
2010	2	1	2	1	2	1	2	1	1	1	1	2	2	2	1	1	1	1	1	1	2	0	0	77
2010	2	1	3	3	1	0	0	1	0	2	1	2	2	2	1	1	1	1	1	2	1	1	1	0
2010	2	1	1	1	1	1	0	1	0	2	1	3	1	3	2	5	5	1	1	2	1	1	1	41
2010	2	1	2	1	1	1	0	1	0	1	1	2	2	2	1	1	1	1	2	1	2	0	0	74
2011	1	1	1	1	2	0	2	2	1	1	2	2	2	2	2	5	0	1	1	1	2	1	1	63
2011	2	1	2	3	2	0	2	1	1	1	2	2	1	2	2	1	1	2	2	2	4	1	1	10
2011	2	1	1	1	1	0	0	1	0	1	2	1	2	2	2	1	1	1	1	2	1	1	1	46
2011	2	1	2	1	2	1	0	1	0	1	2	1	2	2	2	1	1	1	1	2	1	1	1	30
2011	2	1	2	1	2	1	0	1	0	1	2	2	2	2	2	5	0	1	2	2	1	1	1	44
2011	1	1	2	1	2	0	1	2	1	1	2	2	1	2	2	1	1	2	2	1	3	0	0	66
2011	2	1	3	1	2	1	0	1	0	2	1	2	1	2	2	2	2	1	1	2	1	1	1	2
2011	2	1	2	1	2	0	2	2	1	1	1	1	2	2	2	2	2	1	1	3	5	1	1	44
2011	2	1	1	1	2	0	2	2	1	2	1	2	1	2	2	2	2	1	2	2	1	1	1	29
2011	1	1	2	1	1	0	1	1	1	1	1	2	2	2	1	1	1	1	1	2	1	0	0	65
2011	2	1	2	1	1	0	0	1	0	1	1	1	2	2	2	2	2	2	2	2	4	0	1	3
2011	2	1	1	1	1	1	1	1	1	2	1	2	2	2	1	1	1	1	2	2	1	0	0	60
2011	2	1	1	2	2	1	2	1	1	2	1	2	2	2	1	1	1	1	1	2	1	1	1	46
2011	2	1	2	1	1	0	0	1	0	1	1	1	2	2	2	2	2	2	2	1	3	1	1	1
2011	1	2	1	1	2	0	2	1	1	1	1	2	2	2	1	1	1	1	1	2	1	1	1	38
2011	2	1	2	1	1	0	1	1	1	2	2	1	2	2	2	1	1	1	2	2	1	1	1	22
2011	2	1	3	2	1	1	0	1	0	2	1	2	2	2	1	1	1	1	1	2	1	0	0	61
2011	2	1	1	3	1	0	0	1	0	2	2	1	3	2	2	5	5	1	1	2	1	1	1	1
2011	2	1	2	1	2	1	0	2	0	1	1	1	1	1	2	4	4	2	2	1	3	1	1	4
2011	1	1	2	1	2	1	0	1	0	1	2	2	1	2	2	1	1	2	2	2	4	1	1	24
2011	2	1	2	1	2	0	0	1	0	2	1	2	3	2	2	5	5	1	2	2	1	1	1	11
2011	2	3	2	1	2	1	0	2	0	1	2	2	2	2	2	5	0	2	2	1	3	1	1	43
2011	1	1	1	2	1	0	2	2	1	1	1	2	2	2	1	1	1	1	1	2	1	1	1	43
2011	2	1	1	1	1	0	0	1	0	1	1	2	2	2	1	1	1	1	1	2	1	0	0	63
2011	2	1	2	1	2	0	0	1	0	1	2	1	1	2	2	2	2	2	2	2	4	1	1	30
2012	2	1	2	3	2	0	2	1	1	2	1	2	1	2	2	2	2	1	1	2	1	1	1	15
2012	2	1	2	1	1	1	0	1	0	1	1	1	1	2	2	3	3	2	2	1	3	1	1	16
2012	1	2	2	1	2	0	2	1	1	2	1	1	1	2	2	3	3	2	2	2	4	1	1	3
2012	2	1	2	1	1	0	0	1	0	1	1	1	1	3	2	5	5	2	2	2	4	1	1	11
2012	1	1	2	1	2	1	1	1	1	1	2	1	2	2	2	1	1	2	2	2	4	1	1	6
2012	2	1	3	3	2	1	2	1	1	1	1	2	1	2	2	2	2	3	3	3	5	0	0	56
2012	2	1	2	1	2	1	2	1	1	2	1	1	1	2	2	3	3	2	2	2	4	1	1	0
2012	2	1	1	3	2	0	2	1	1	1	2	2	1	2	2	1	1	2	2	2	4	1	1	6
2012	2	1	2	1	2	1	0	1	0	1	1	2	1	1	2	3	3	1	2	1	2	1	1	1
2012	2	1	2	3	1	1	2	2	1	2	1	2	2	2	1	1	1	1	1	2	1	1	1	47
2012	1	1	2	1	2	1	2	1	1	1	1	2	2	2	1	1	1	1	1	2	1	0	1	2
2012	2	1	2	1	1	0	1	2	1	1	2	1	2	2	2	1	1	2	2	2	4	1	1	17
2012	2	1	1	1	2	1	0	1	0	2	1	2	2	2	1	1	1	1	1	2	1	0	0	58
2012	2	1	1	1	2	0	2	1	1	1	1	2	2	2	1	1	1	1	1	2	1	0	0	58
2012	2	1	2	1	2	1	2	1	1	1	2	1	3	2	2	5	5	2	2	1	3	1	1	4
2012	2	1	2	1	1	0	0	1	0	2	1	2	3	2	2	5	5	2	2	2	4	1	1	1
2012	2	1	3	2	2	0	0	1	0	1	1	2	2	2	1	1	1	2	2	1	3	1	1	4
2012	2	1	1	1	1	0	0	1	0	1	1	2	2	2	1	1	1	2	2	1	3	0	0	49
2012	2	1	2	1	1	0	0	1	0	2	2	2	1	2	2	1	1	1	1	2	1	0	0	58
2012	1	1	2	1	2	1	0	1	0	1	1	1	2	2	2	2	2	2	2	1	3	1	1	20
2012	2	1	3	1	2	0	0	1	0	2	2	1	1	2	2	2	2	3	3	3	5	1	1	0
2012	2	1	2	1	2	1	2	1	1	1	2	1	2	2	2	1	1	1	1	1	2	0	0	56
2012	2	1	3	3	1	0	0	1	0	2	1	2	1	2	2	2	2	3	3	3	5	1	1	1
2012	2	1	2	1	2	1	0	1	0	1	1	1	3	2	2	5	5	1	2	1	2	1	1	0
2012	2	1	1	1	2	0	0	1	0	1	1	2	2	2	1	1	1	1	1	1	2	0	0	57
2012	2	1	1	1	1	0	0	1	0	2	1	3	2	3	2	5	5	1	1	2	1	1	1	32
2012	2	1	3	3	2	0	0	1	0	2	1	2	1	2	2	2	2	1	1	2	1	0	1	19
2012	2	1	1	1	1	1	2	1	1	1	2	2	2	2	2	5	0	1	1	2	1	1	1	3
2012	2	1	3	3	1	0	0	1	0	2	1	2	2	2	1	1	1	1	1	2	1	0	0	52
2013	2	1	1	1	2	0	2	1	1	2	2	1	2	2	2	1	1	1	1	2	1	1	1	34
2012	1	1	3	3	2	1	0	2	0	1	1	1	2	2	2	2	2	2	2	1	3	1	1	32
2012	2	1	1	1	1	0	2	1	1	1	1	2	2	2	1	1	1	1	1	3	5	1	1	42
2012	2	1	1	2	1	1	0	1	0	2	1	2	2	2	1	1	1	1	1	2	1	0	0	48
2013	1	1	2	1	1	0	0	1	0	1	1	1	2	2	2	2	2	1	1	2	1	1	1	17
2013	2	1	1	1	2	0	0	1	0	1	1	2	2	2	1	1	1	1	1	2	1	0	1	17
2013	2	1	1	3	1	1	1	1	1	2	1	2	2	2	1	1	1	1	1	2	1	0	0	44
2013	2	1	1	1	2	1	2	1	1	1	1	2	2	2	1	1	1	1	1	1	2	0	0	45
2012	2	1	3	3	2	0	0	2	0	2	1	2	2	2	1	1	1	1	1	2	1	0	0	54
2012	2	1	2	1	2	1	0	1	0	1	1	2	2	2	1	1	1	2	2	1	3	1	1	4
2012	2	1	2	1	1	1	2	1	1	1	2	2	2	2	2	5	0	2	2	1	3	0	0	50
2012	2	1	1	2	1	0	2	1	1	2	1	2	2	2	1	1	1	1	1	2	1	1	1	43
2012	1	1	2	1	1	1	0	1	0	1	1	2	1	2	2	2	2	1	1	2	1	1	1	35
2012	1	1	2	1	1	0	1	1	1	1	3	2	1	2	2	5	5	2	2	2	4	1	1	21
2012	2	1	1	1	2	0	0	1	0	1	2	1	1	2	2	2	2	1	1	1	2	0	0	50
2013	2	1	1	1	1	0	0	1	0	1	1	2	2	2	1	1	1	2	2	1	3	1	1	42
2013	2	1	1	1	1	0	0	1	0	2	1	3	2	2	2	5	5	1	1	2	1	0	0	40
2013	2	1	1	3	1	1	0	2	0	2	1	2	1	2	2	2	2	1	1	2	1	1	1	39
2013	2	1	1	1	1	0	0	2	0	1	1	2	2	2	1	1	1	1	1	1	2	0	0	47
2013	2	1	3	3	2	0	0	1	0	1	2	2	1	1	2	2	2	3	3	3	5	1	1	7
2013	1	1	1	1	2	1	0	2	0	1	1	2	2	2	1	1	1	1	1	2	1	0	0	35
2013	1	1	2	1	2	0	2	1	1	1	2	2	1	2	2	1	1	2	2	2	4	1	1	18
2013	2	1	2	1	1	0	2	1	1	2	1	2	2	2	1	1	1	1	1	2	1	1	1	31
2013	2	1	2	1	1	0	1	2	1	1	1	1	2	2	2	2	2	1	2	2	1	1	1	4
2013	2	1	2	1	2	0	2	1	1	1	2	2	2	2	2	5	0	2	2	2	4	0	0	44
2013	2	1	1	1	1	0	0	1	0	1	2	2	2	2	2	5	0	2	2	2	4	1	1	27
2013	2	1	1	1	1	0	0	2	0	1	1	2	1	2	2	2	2	1	1	1	2	0	0	44
2013	1	1	3	1	2	1	0	1	0	1	1	1	1	2	2	3	3	1	1	2	1	1	1	8
2013	2	1	1	1	1	1	2	1	1	2	1	3	2	2	2	5	5	1	1	2	1	0	0	41
2013	1	1	2	1	2	1	1	1	1	1	2	2	1	2	2	1	1	1	1	1	2	0	0	41
2013	2	1	2	1	1	1	2	1	1	1	1	1	2	2	2	2	2	1	2	1	2	1	1	27
2013	2	1	1	1	1	0	0	1	0	1	2	1	2	2	2	1	1	1	1	2	1	1	1	24
2013	1	1	2	1	2	0	0	1	0	1	1	2	2	2	1	1	1	2	2	1	3	0	0	39
2013	2	1	2	1	2	0	0	1	0	2	1	2	2	2	1	1	1	1	2	1	2	0	1	1
2013	2	1	1	1	1	0	0	1	0	1	1	2	2	2	1	1	1	1	1	1	2	0	0	44
2013	2	1	2	1	2	1	0	1	0	2	2	2	1	2	2	1	1	2	2	1	3	1	1	16
2013	2	1	2	1	1	0	2	2	1	1	1	2	2	2	1	1	1	2	2	2	4	1	1	29
2013	1	1	1	1	1	0	0	1	0	2	1	2	2	2	1	1	1	1	1	2	1	1	1	9
2013	2	1	2	1	1	1	0	1	0	1	2	2	2	2	2	5	0	2	2	2	4	1	1	5
2013	2	1	3	1	2	0	0	1	0	1	1	2	2	2	1	1	1	1	1	2	1	0	0	39
2013	1	1	2	1	2	1	2	1	1	1	2	2	2	2	2	5	0	2	2	2	4	0	0	38
2013	2	1	2	1	1	0	1	1	1	2	2	1	2	2	2	1	1	1	1	2	1	0	0	37
2013	1	1	1	1	2	0	0	1	0	1	1	2	2	2	1	1	1	1	1	2	1	0	0	38
2013	2	1	2	1	1	1	2	1	1	1	1	1	2	2	2	2	2	2	2	2	4	1	1	38
2013	2	1	1	1	1	0	0	2	0	2	2	2	1	2	2	1	1	1	1	2	1	1	1	7
2013	2	1	2	1	2	1	0	1	0	1	2	2	2	2	2	5	0	1	1	2	1	0	0	38
2013	2	1	1	1	1	0	0	1	0	1	1	2	1	2	2	2	2	2	2	2	4	1	1	20
2013	2	1	2	1	2	1	0	1	0	2	3	2	1	2	2	5	5	1	1	2	1	1	1	18
2013	1	1	2	1	2	0	0	1	0	1	1	2	2	2	1	1	1	1	1	2	1	1	1	20
2013	1	1	2	1	1	1	0	1	0	1	1	2	2	2	1	1	1	1	2	2	1	1	1	29
2014	2	1	2	1	1	0	1	2	1	2	1	2	2	3	2	5	5	2	2	2	4	1	1	7
2013	2	1	3	3	1	0	0	1	0	2	1	2	2	1	2	2	2	3	3	3	5	1	1	0
2013	2	1	2	1	2	0	0	1	0	1	1	1	1	3	2	5	5	1	2	1	2	0	0	37
2013	1	1	1	1	1	0	1	1	1	2	1	1	1	2	2	3	3	1	2	1	2	1	1	2
2013	2	1	2	1	2	1	2	1	1	1	2	1	2	2	2	1	1	1	2	1	2	0	0	44
2014	2	1	2	1	2	0	0	1	0	1	1	1	3	3	2	5	5	2	2	1	3	1	1	0
2014	2	1	2	1	1	0	0	1	0	1	2	2	1	2	2	1	1	1	2	1	2	0	0	28
2014	2	1	3	2	1	1	0	1	0	2	1	2	2	2	1	1	1	1	1	2	1	1	1	15
2014	2	1	1	1	1	0	0	1	0	2	3	1	1	2	2	5	5	1	1	2	1	1	1	1
2014	2	1	2	1	2	0	0	1	0	1	1	1	2	2	2	2	2	2	2	2	4	1	1	6
2013	2	1	2	1	1	0	2	2	1	1	1	2	1	1	2	3	3	2	2	2	4	1	1	5
2013	2	1	2	3	1	0	0	1	0	1	1	2	2	2	1	1	1	1	1	2	1	1	1	24
2014	2	1	2	1	2	1	0	1	0	2	1	2	2	2	1	1	1	1	2	2	1	1	1	3
2014	2	1	2	3	1	0	0	1	0	1	2	2	2	2	2	5	0	2	2	2	4	1	1	21
2014	2	1	2	2	2	0	2	1	1	1	1	2	2	2	1	1	1	1	2	2	1	0	0	28
2014	2	1	1	1	2	1	2	1	1	2	2	2	1	2	2	1	1	1	1	2	1	0	0	31
2013	2	1	2	1	1	0	0	1	0	1	2	1	1	2	2	2	2	1	1	2	1	0	1	19
2014	1	1	1	1	1	0	0	2	0	1	1	2	1	2	2	2	2	1	1	2	1	0	0	27
2013	2	1	2	1	2	0	0	1	0	1	1	2	1	2	2	2	2	1	1	2	1	1	1	8
2013	2	1	1	1	1	0	0	1	0	2	2	1	1	1	2	3	3	1	1	2	1	1	1	2
2013	2	1	2	1	2	1	2	1	1	1	2	2	1	2	2	1	1	2	2	1	3	1	1	25
2014	1	1	1	3	1	0	0	1	0	1	2	2	2	2	2	5	0	1	1	2	1	0	0	31
2014	2	1	2	1	1	0	2	1	1	2	2	1	1	2	2	2	2	1	1	2	1	0	0	26
2014	2	1	2	1	2	0	2	1	1	1	1	2	2	2	1	1	1	2	2	1	3	0	0	30
2013	2	1	1	1	2	1	0	1	0	2	1	2	2	2	1	1	1	1	1	2	1	1	1	0
2014	2	1	1	1	2	1	0	1	0	2	2	2	2	2	2	5	0	1	1	2	1	1	1	27
2014	2	1	1	1	2	0	2	1	1	1	1	2	1	2	2	2	2	1	1	2	1	0	0	35
2014	1	1	2	1	1	0	1	2	1	2	1	2	2	2	1	1	1	1	1	2	1	0	0	31
2014	2	1	2	1	1	0	0	1	0	1	1	2	3	2	2	5	5	1	2	2	1	0	0	24
2014	2	1	1	3	2	0	2	2	1	1	1	2	1	2	2	2	2	1	1	1	2	0	0	30
2015	2	1	2	1	1	0	0	1	0	1	1	2	2	1	2	2	2	2	2	2	4	0	0	22
2014	1	1	2	1	1	1	0	1	0	1	1	1	1	2	2	3	3	2	2	1	3	1	1	22
2015	2	1	2	1	1	0	2	1	1	1	2	2	1	2	2	1	1	2	2	2	4	1	1	15
2014	2	1	2	1	1	0	1	1	1	1	2	1	2	2	2	1	1	1	1	1	2	0	0	25
2014	2	1	2	1	2	0	2	2	1	1	1	1	2	2	2	2	2	2	2	1	3	0	0	31
2014	2	1	3	1	1	1	0	1	0	1	1	1	2	2	2	2	2	1	1	2	1	0	0	27
2014	2	1	1	2	2	1	2	1	1	2	1	2	2	2	1	1	1	1	1	2	1	0	1	16
2015	1	1	1	1	1	0	0	1	0	2	1	2	2	2	1	1	1	1	1	2	1	0	0	19
2015	2	1	2	1	1	0	0	1	0	1	2	2	1	2	2	1	1	1	2	2	1	1	1	9
2015	2	1	2	1	1	1	0	1	0	1	2	1	2	2	2	1	1	1	1	1	2	0	1	18
2014	2	1	2	1	2	0	1	1	1	1	2	1	1	2	2	2	2	2	2	2	4	0	1	12
2015	2	1	2	1	1	0	0	1	0	2	2	1	2	2	2	1	1	2	2	2	4	1	1	3
2014	2	1	3	3	1	1	0	1	0	2	1	2	2	2	1	1	1	1	1	2	1	1	1	1
2015	2	1	2	1	1	0	1	2	1	1	1	1	1	1	2	4	4	2	2	2	4	1	1	4
2014	2	1	1	1	2	1	0	2	0	1	2	2	2	2	2	5	0	1	1	2	1	0	0	26
2015	2	1	2	1	2	0	0	1	0	1	1	2	2	2	1	1	1	1	1	1	2	0	0	21
2014	2	1	3	3	1	0	0	1	0	1	2	2	2	2	2	5	0	1	2	1	2	1	1	14
2015	2	1	2	1	1	0	2	1	1	1	2	1	2	2	2	1	1	1	2	2	1	1	1	8
2015	2	1	1	1	2	1	0	1	0	1	1	2	2	2	1	1	1	1	1	2	1	0	0	16
2015	1	1	1	1	1	0	0	1	0	1	1	2	2	2	1	1	1	1	1	2	1	0	0	20
2015	1	1	2	1	1	0	0	1	0	1	1	2	1	2	2	2	2	1	1	1	2	0	0	16
2014	2	1	2	1	1	0	0	2	0	2	1	1	2	2	2	2	2	1	1	2	1	1	1	8
2015	2	1	1	1	2	1	2	1	1	1	1	2	2	2	1	1	1	1	2	1	2	0	0	8
2015	2	1	3	1	2	0	0	1	0	2	2	1	2	2	2	1	1	1	1	1	2	1	1	4
2015	2	1	2	1	1	0	0	2	0	1	1	1	3	2	2	5	5	1	2	2	1	1	1	2
2015	2	1	1	1	1	0	0	1	0	2	2	1	2	2	2	1	1	1	1	2	1	0	0	21
2015	2	1	2	1	2	1	0	2	0	1	2	2	1	2	2	1	1	2	2	1	3	1	1	15
2015	2	1	2	1	1	1	0	1	0	2	2	2	1	2	2	1	1	1	1	2	1	1	1	0
2015	2	1	2	1	1	1	2	1	1	2	1	2	2	2	1	1	1	1	1	1	2	0	0	16
2015	2	1	1	1	1	0	0	1	0	1	1	2	2	2	1	1	1	1	2	2	1	0	0	21
2015	2	1	2	1	2	1	2	1	1	2	1	2	2	2	1	1	1	1	2	2	1	0	0	20
2015	2	1	2	1	1	0	0	2	0	2	2	2	1	1	2	2	2	2	2	2	4	1	1	2
2015	2	1	1	2	2	0	0	1	0	1	1	2	2	2	1	1	1	1	2	2	1	0	0	14
2015	2	1	2	1	1	0	0	1	0	1	2	2	1	2	2	1	1	2	2	1	3	0	0	18
2015	2	1	2	1	2	0	0	1	0	2	1	1	1	2	2	3	3	1	1	2	1	1	1	15
2015	1	1	2	1	2	0	2	2	1	1	2	2	2	2	2	5	0	1	2	1	2	0	0	19
2015	2	1	2	1	1	0	0	1	0	1	1	2	3	1	2	5	5	2	2	1	3	1	1	5
2015	2	1	1	1	2	1	2	1	1	1	1	1	2	2	2	2	2	2	2	2	4	0	0	17
2015	1	1	1	2	2	1	0	1	0	1	2	1	2	2	2	1	1	1	1	1	2	0	0	15
2015	2	1	1	1	1	0	0	1	0	1	1	2	2	2	1	1	1	1	1	1	2	0	0	16
2015	2	1	1	2	2	0	2	2	1	1	1	2	2	2	1	1	1	1	1	2	1	0	0	20
2015	2	1	1	1	1	0	0	1	0	1	1	2	2	2	1	1	1	1	1	2	1	0	0	9
2015	2	1	1	1	2	1	0	1	0	1	1	3	2	2	2	5	5	1	1	2	1	0	0	15
2015	2	1	2	1	2	1	0	1	0	2	2	3	1	2	2	5	5	2	1	2	1	1	1	11
2015	2	1	1	3	1	0	0	1	0	1	1	2	2	2	1	1	1	1	1	2	1	0	0	17
2015	1	1	1	1	2	0	0	1	0	1	1	2	2	2	1	1	1	1	1	1	2	0	0	17
2014	2	1	2	1	2	0	0	1	0	1	2	1	2	2	2	1	1	2	2	1	3	0	0	32
2015	2	1	3	3	2	0	2	1	1	1	2	2	2	2	2	5	0	1	1	2	1	0	0	14
2015	2	1	2	1	2	1	2	1	1	1	1	1	1	2	2	3	3	1	1	2	1	0	0	19
2015	1	1	2	1	2	0	0	1	0	1	2	1	1	2	2	2	2	2	2	2	4	1	1	12
2015	2	1	1	1	2	0	0	1	0	1	1	1	2	2	2	2	2	2	2	2	4	1	1	14
2015	2	1	2	1	2	1	0	1	0	1	1	1	2	2	2	2	2	2	2	1	3	0	1	6
2015	1	1	2	1	1	0	0	1	0	1	2	1	1	2	2	2	2	1	1	1	2	0	0	12
2015	2	1	2	1	1	1	0	1	0	1	2	2	2	2	2	5	0	1	1	2	1	1	1	12
2010	2	1	2	3	2	0	0	1	0	2	2	2	2	1	2	1	1	2	2	2	4	1	1	0
2010	2	1	2	1	1	0	0	1	0	1	1	1	1	1	2	4	4	2	2	2	4	1	1	20
2010	2	1	2	1	1	0	2	1	1	1	1	2	2	2	1	1	1	1	1	1	2	0	0	80
2010	2	1	3	3	2	1	0	2	0	1	2	2	2	1	2	1	1	2	2	1	3	1	1	38
2010	2	1	1	1	1	0	0	1	0	2	1	2	2	2	1	1	1	1	1	1	2	0	1	9
2010	2	1	2	1	2	0	0	1	0	1	2	2	1	2	2	1	1	1	2	1	2	1	1	23
2010	2	3	2	1	2	1	0	2	0	1	2	2	2	2	2	5	0	2	2	1	3	1	1	32
2010	2	1	1	1	1	1	1	1	1	2	1	2	2	2	1	1	1	1	1	3	5	0	0	79
2010	2	1	1	1	2	0	0	1	0	1	1	2	2	2	1	1	1	1	1	2	1	1	1	68
2010	1	2	1	1	1	0	1	1	1	1	2	2	1	2	2	1	1	2	2	2	4	1	1	25
2010	2	1	1	1	2	0	0	1	0	1	2	2	1	2	2	1	1	1	1	3	5	1	1	28
2010	2	1	2	1	2	0	2	1	1	1	1	2	1	2	2	2	2	2	2	3	5	1	1	8
2010	2	1	2	1	2	1	2	1	1	1	1	2	2	2	1	1	1	3	3	3	5	1	1	30
2010	2	1	1	1	2	1	2	1	1	2	1	2	2	2	1	1	1	1	2	2	1	1	1	5
2010	2	1	2	1	2	0	1	1	1	1	2	1	2	2	2	1	1	2	2	2	4	1	1	11
2010	2	1	2	1	2	1	1	1	1	1	2	2	1	2	2	1	1	2	1	2	1	1	1	12
2010	1	1	1	2	2	0	1	1	1	2	1	2	2	2	1	1	1	1	1	2	1	1	1	6
2011	2	1	1	1	1	0	1	1	1	2	2	1	2	2	2	1	1	1	2	2	1	0	0	53
2010	2	1	1	3	2	1	2	1	1	2	2	2	1	2	2	1	1	1	1	2	1	1	1	17
2010	2	1	2	1	1	0	2	1	1	2	2	2	2	2	2	5	0	1	1	2	1	0	0	76
2011	2	1	3	1	1	1	0	1	0	1	1	2	2	2	1	1	1	1	1	1	2	1	1	46
2011	2	1	3	3	2	0	0	1	0	1	1	2	2	2	1	1	1	2	1	1	2	1	1	43
2011	1	1	2	1	1	1	0	2	0	1	1	2	2	2	1	1	1	2	2	2	4	1	1	21
2010	2	1	2	1	2	0	2	1	1	1	2	2	1	2	2	1	1	3	3	3	5	1	1	24
2011	1	1	2	1	2	0	1	1	1	1	2	2	1	2	2	1	1	1	2	1	2	0	0	66
2011	1	1	2	1	1	1	0	1	0	1	2	1	2	2	2	1	1	2	1	1	2	1	1	45
2010	2	1	1	1	2	0	1	2	1	1	2	2	1	2	2	1	1	1	1	3	5	0	0	60
2011	2	1	2	3	1	0	1	1	1	2	1	2	2	2	1	1	1	1	1	2	1	1	1	19
2011	2	1	2	1	2	1	0	1	0	1	1	2	2	2	1	1	1	1	1	1	2	1	1	2
2011	2	1	3	1	1	1	0	1	0	1	1	2	2	2	1	1	1	1	1	2	1	1	1	24
2011	2	1	1	1	2	0	0	1	0	1	1	1	2	2	2	2	2	1	1	1	2	1	1	0
2011	1	1	1	1	1	0	1	2	1	1	2	1	2	2	2	1	1	1	1	2	1	0	0	65
2012	2	3	3	1	2	0	0	1	0	2	2	1	2	2	2	1	1	1	1	2	1	1	1	18
2012	1	1	2	1	1	0	1	1	1	1	3	3	3	3	2	5	5	1	1	1	2	0	0	57
2012	2	1	1	1	1	0	1	1	1	2	1	2	2	2	1	1	1	1	1	2	1	0	0	58
2012	2	1	2	1	2	1	0	1	0	2	1	2	2	2	1	1	1	1	1	2	1	0	0	55
2012	2	1	2	1	1	0	2	1	1	2	2	1	2	2	2	1	1	2	2	1	3	1	1	37
2012	2	1	2	1	1	1	2	1	1	1	2	2	2	2	2	5	0	1	1	2	1	0	0	56
2011	2	3	1	2	2	0	2	1	1	1	1	2	2	2	1	1	1	2	2	2	4	0	0	56
2011	2	1	3	1	1	0	0	1	0	1	1	2	2	1	2	2	2	1	1	2	1	1	1	16
2011	1	1	2	3	2	1	2	1	1	1	1	2	2	2	1	1	1	1	1	1	2	1	1	61
2011	1	1	1	1	1	0	0	1	0	1	1	2	1	2	2	2	2	1	1	2	1	0	0	64
2012	2	1	3	3	1	1	0	1	0	1	1	2	1	2	2	2	2	2	2	2	4	1	1	5
2012	1	3	1	3	2	0	0	1	0	2	1	2	2	2	1	1	1	1	1	2	1	0	0	59
2012	2	1	3	2	1	0	0	1	0	2	3	3	3	3	2	5	5	1	1	2	1	0	0	50
2012	2	1	1	1	2	1	0	1	0	2	2	2	1	2	2	1	1	1	1	2	1	0	0	53
2012	2	1	1	1	2	1	0	1	0	1	2	1	1	2	2	2	2	1	1	2	1	1	1	45
2012	2	1	1	1	2	1	0	2	0	2	1	3	1	1	2	5	5	1	1	2	1	0	0	51
2012	1	1	3	1	1	0	0	2	0	1	1	2	2	2	1	1	1	1	1	2	1	1	1	35
2012	2	3	1	1	1	0	1	1	1	1	2	2	1	2	2	1	1	1	1	2	1	0	1	2
2013	2	1	3	1	1	1	2	1	1	1	1	2	2	2	1	1	1	1	1	1	2	0	0	45
2013	2	1	1	3	1	0	0	1	0	1	1	2	2	2	1	1	1	1	1	2	1	1	1	21
2013	2	1	1	1	2	0	0	1	0	1	1	1	2	2	2	2	2	2	2	2	4	1	1	5
2013	1	3	3	3	1	1	0	2	0	1	3	3	3	1	2	5	5	2	2	2	4	1	1	4
2013	2	1	1	1	1	0	0	1	0	1	1	2	2	2	1	1	1	1	1	1	2	0	0	39
2013	1	1	1	1	1	1	0	1	0	1	1	1	2	2	2	2	2	1	1	2	1	1	1	12
2012	2	1	1	1	1	1	2	1	1	1	1	2	1	2	2	2	2	1	1	2	1	0	0	53
2013	2	1	2	1	2	0	2	1	1	1	2	2	1	2	2	1	1	2	2	1	3	1	1	11
2013	2	1	1	3	1	0	0	1	0	1	1	2	2	2	1	1	1	1	1	2	1	0	0	37
2013	2	1	3	3	2	1	0	1	0	1	2	2	2	2	2	5	0	1	1	2	1	1	1	16
2013	2	3	1	1	2	1	0	1	0	1	1	2	1	2	2	2	2	1	1	2	1	1	1	15
2013	2	1	1	1	2	0	0	1	0	1	1	1	2	2	2	2	2	1	1	2	1	1	1	39
2013	2	1	3	3	2	1	0	1	0	1	2	2	2	2	2	5	0	1	1	1	2	0	0	36
2013	2	1	1	2	1	1	2	1	1	1	1	2	2	2	1	1	1	1	1	2	1	0	0	38
2014	2	1	2	1	2	1	0	1	0	1	1	2	2	1	2	2	2	1	1	2	1	1	1	5
2014	2	1	2	1	2	0	0	1	0	1	1	1	2	2	2	2	2	2	2	2	4	1	1	22
2014	2	1	2	1	1	0	0	1	0	2	2	2	2	1	2	1	1	1	1	2	1	0	0	34
2013	2	1	3	3	2	0	2	2	1	1	1	1	2	2	2	2	2	1	2	1	2	0	1	26
2014	2	1	1	1	2	0	0	1	0	2	2	2	1	2	2	1	1	1	1	1	2	0	0	30
2014	2	1	2	1	2	0	0	1	0	2	2	2	1	2	2	1	1	2	2	1	3	1	1	1
2014	2	1	2	1	2	0	2	1	1	1	1	2	1	2	2	2	2	1	1	1	2	0	0	20
2013	1	1	1	1	1	0	1	1	1	2	1	2	2	2	1	1	1	2	2	2	4	1	1	4
2014	2	1	2	1	1	0	0	1	0	1	1	2	2	2	1	1	1	1	2	2	1	1	1	29
2014	2	1	2	1	2	1	0	1	0	1	2	2	2	2	2	5	0	1	2	2	1	1	1	12
2014	2	1	1	1	2	1	2	1	1	1	2	2	2	2	2	5	0	1	2	1	2	0	0	27
2014	2	1	1	3	1	1	2	1	1	1	1	2	2	2	1	1	1	1	1	2	1	0	0	28
2015	2	1	2	3	1	0	1	2	1	2	1	2	2	2	1	1	1	1	1	2	1	0	0	23
2015	1	1	1	1	1	0	0	1	0	2	1	2	2	2	1	1	1	1	1	2	1	0	0	20
2015	2	1	3	1	2	0	0	1	0	2	1	2	2	2	1	1	1	1	2	3	5	1	1	9
2014	2	1	2	3	2	1	0	1	0	1	2	2	2	2	2	5	0	1	1	2	1	1	1	16
2014	1	1	1	1	2	0	2	1	1	1	2	2	1	2	2	1	1	2	2	2	4	1	1	15
2015	1	1	2	1	2	1	2	1	1	1	1	2	2	2	1	1	1	1	2	2	1	1	1	7
2015	2	1	1	1	1	1	0	2	0	2	3	3	3	3	2	5	5	1	1	2	1	0	0	2
2014	1	1	1	2	1	1	2	1	1	1	1	2	2	2	1	1	1	1	1	2	1	0	0	25
2015	2	1	1	1	2	0	0	1	0	1	2	1	2	2	2	1	1	1	2	1	2	0	0	13
2014	1	1	2	1	1	0	0	1	0	1	2	2	1	2	2	1	1	2	2	1	3	0	0	16
2015	2	1	2	1	1	0	0	1	0	1	2	1	2	2	2	1	1	1	2	2	1	1	1	5
2015	2	1	1	1	2	1	0	1	0	1	1	2	1	2	2	2	2	1	1	1	2	0	0	17
2015	1	1	1	1	1	0	2	1	1	1	2	1	2	2	2	1	1	2	2	1	3	0	0	12
2015	2	1	2	1	2	0	0	1	0	1	1	1	2	2	2	2	2	2	2	2	4	1	1	0
2015	1	2	3	1	1	1	0	1	0	1	1	2	2	2	1	1	1	1	1	1	2	0	0	15
2015	2	1	2	1	2	1	0	1	0	1	3	3	3	3	2	5	5	1	2	2	1	1	1	7
2015	2	1	3	3	2	0	0	1	0	1	1	2	2	2	1	1	1	3	3	3	5	0	0	12
2015	2	1	2	2	1	0	1	1	1	1	1	2	2	2	1	1	1	1	1	2	1	0	0	13
2015	2	1	2	1	2	1	0	1	0	1	2	2	1	2	2	1	1	2	2	2	4	1	1	11
2015	2	1	1	1	2	1	0	1	0	2	1	2	2	2	1	1	1	1	2	2	1	1	1	1
2015	2	1	1	1	1	0	0	1	0	1	1	2	2	2	1	1	1	1	1	2	1	1	1	10
2015	2	1	2	1	1	0	0	1	0	1	2	1	2	2	2	1	1	1	1	2	1	0	0	12
2015	1	1	2	1	2	1	0	1	0	1	1	1	1	2	2	3	3	2	2	1	3	0	0	14
2012	2	1	1	1	2	0	1	1	1	2	1	2	2	2	1	1	1	1	1	2	1	0	0	57
2015	2	2	1	1	1	0	1	2	1	1	1	2	2	2	1	1	1	1	1	3	5	0	0	15
2010	2	1	1	2	1	0	2	1	1	2	1	2	2	2	1	1	1	1	1	2	1	1	1	78
2010	2	1	2	1	2	0	1	2	1	1	2	2	2	2	2	5	0	2	2	2	4	0	0	81
2010	2	1	1	2	2	1	2	1	1	1	1	2	2	2	1	1	1	1	1	2	1	0	0	80
2010	2	1	2	1	1	1	0	1	0	1	1	1	3	2	2	5	5	1	1	2	1	1	1	7
2010	2	2	2	1	2	0	2	1	1	1	1	2	2	2	1	1	1	2	2	2	4	1	1	12
2010	1	1	2	1	2	0	0	2	0	1	1	3	2	2	2	5	5	1	1	2	1	1	1	70
2010	2	1	1	3	2	0	2	1	1	1	1	2	2	2	1	1	1	1	1	2	1	1	1	26
2010	2	1	2	1	2	0	2	1	1	1	1	2	1	2	2	2	2	1	1	1	2	1	1	50
2010	1	1	3	3	2	0	2	1	1	1	2	2	1	2	2	1	1	3	3	3	5	1	1	5
2010	2	1	1	2	2	1	2	1	1	2	2	2	2	2	2	5	0	2	2	2	4	1	1	17
2010	2	1	1	1	1	0	0	2	0	2	1	2	2	1	2	2	2	1	2	2	1	1	1	68
2010	1	3	2	3	1	0	2	1	1	2	2	2	2	2	2	5	0	1	1	3	5	1	1	4
2010	2	1	2	3	2	0	2	1	1	1	3	3	1	3	2	5	5	1	1	1	2	1	1	8
2010	2	1	2	1	1	1	2	1	1	1	2	2	2	2	2	5	0	1	1	2	1	1	1	31
2010	2	3	2	1	2	0	1	1	1	2	2	2	1	2	2	1	1	2	2	2	4	1	1	5
2010	2	1	3	2	1	0	0	1	0	1	2	2	2	2	2	5	0	1	1	2	1	1	1	42
2010	1	3	2	1	2	0	2	2	1	2	1	2	3	2	2	5	5	1	1	2	1	1	1	48
2010	1	1	1	1	1	0	0	1	0	2	1	2	2	2	1	1	1	1	1	2	1	1	1	67
2010	2	1	2	3	1	1	2	2	1	2	1	2	2	1	2	2	2	1	2	2	1	0	1	18
2010	2	1	2	1	2	0	0	1	0	1	2	2	1	2	2	1	1	2	2	2	4	0	1	4
2010	1	1	1	2	1	0	2	2	1	2	1	2	2	2	1	1	1	1	1	2	1	0	0	77
2010	2	1	1	3	1	0	2	1	1	1	1	2	2	2	1	1	1	2	2	2	4	1	1	15
2010	2	1	3	3	1	0	2	1	1	1	2	2	2	2	2	5	0	2	2	1	3	1	1	31
2010	2	3	2	1	2	0	2	1	1	1	1	2	2	2	1	1	1	2	2	2	4	0	0	75
2010	1	1	1	2	2	1	2	1	1	1	1	2	2	2	1	1	1	1	2	2	1	1	1	23
2010	2	1	1	1	1	0	0	1	0	2	1	2	2	2	1	1	1	1	1	1	2	1	1	6
2010	2	1	1	1	1	0	1	1	1	2	1	2	2	2	1	1	1	1	2	2	1	1	1	46
2010	2	3	1	3	2	0	0	2	0	1	1	2	2	2	1	1	1	1	1	2	1	0	0	60
2010	2	1	1	1	2	1	0	1	0	2	1	2	2	2	1	1	1	1	1	2	1	1	1	2
2010	2	1	2	1	2	0	2	1	1	2	1	3	3	3	2	5	5	1	1	2	1	1	1	58
2010	2	1	1	1	2	0	2	1	1	1	1	2	1	1	2	3	3	1	1	2	1	0	0	74
2010	1	1	2	1	2	1	0	1	0	1	2	2	2	2	2	5	0	2	2	2	4	1	1	9
2010	2	1	3	3	2	1	0	1	0	1	2	2	3	2	2	5	5	1	1	1	2	1	1	30
2010	2	1	3	1	2	0	0	1	0	2	2	2	2	2	2	5	0	1	2	2	1	1	1	37
2010	2	1	2	1	2	0	0	1	0	1	1	2	2	2	1	1	1	2	1	2	1	1	1	5
2010	2	1	1	3	2	1	0	1	0	2	1	2	2	1	2	2	2	1	2	2	1	1	1	17
2010	2	1	1	1	2	0	0	1	0	1	2	1	2	2	2	1	1	2	2	1	3	0	0	73
2010	1	1	2	3	1	0	2	1	1	1	1	2	2	2	1	1	1	1	1	2	1	0	0	73
2010	2	1	3	3	2	0	0	1	0	2	2	2	1	2	2	1	1	3	3	3	5	1	1	0
2010	2	3	2	1	2	1	2	1	1	2	2	2	2	2	2	5	0	1	1	2	1	1	1	33
2010	2	1	2	1	2	0	1	1	1	1	2	2	1	2	2	1	1	2	2	2	4	1	1	26
2010	2	1	3	3	2	0	0	1	0	1	1	3	3	3	2	5	5	1	1	2	1	1	1	29
2010	2	1	3	3	1	0	0	2	0	1	1	2	2	1	2	2	2	2	2	2	4	1	1	9
2010	1	3	2	3	2	0	2	1	1	2	2	2	1	2	2	1	1	2	2	2	4	0	0	72
2011	2	1	2	1	2	0	0	2	0	1	1	2	1	2	2	2	2	2	2	2	4	1	1	13
2011	2	1	1	1	2	1	0	1	0	1	1	2	1	2	2	2	2	1	1	2	1	1	1	27
2011	2	1	1	2	1	1	0	1	0	2	2	2	2	2	2	5	0	1	1	2	1	0	0	70
2011	2	1	2	1	2	0	2	1	1	1	1	3	3	3	2	5	5	1	1	1	2	0	0	71
2011	2	1	1	1	2	0	0	1	0	1	1	2	1	2	2	2	2	1	1	2	1	0	1	61
2011	2	1	2	1	1	0	1	2	1	1	1	2	2	2	1	1	1	2	2	2	4	0	0	71
2011	2	1	2	1	1	0	2	1	1	1	1	2	2	2	1	1	1	2	2	1	3	0	0	70
2011	2	1	3	3	2	1	0	1	0	2	1	1	2	2	2	2	2	1	1	2	1	1	1	13
2011	2	1	3	3	1	1	0	1	0	2	1	1	1	1	2	4	4	1	1	2	1	1	1	13
2011	2	1	1	1	1	1	2	1	1	1	1	2	1	2	2	2	2	1	1	2	1	0	0	69
2011	1	1	3	3	1	0	0	1	0	1	1	1	1	2	2	3	3	1	3	2	5	1	1	32
2011	1	1	1	1	1	0	0	2	0	2	1	1	2	1	2	3	3	1	2	2	1	1	1	1
2011	2	1	1	2	1	1	0	2	0	2	1	2	2	2	1	1	1	1	1	2	1	1	1	66
2011	1	1	2	1	1	0	1	1	1	1	2	1	2	2	2	1	1	2	2	1	3	1	1	16
2011	2	1	2	3	2	1	0	2	0	1	2	1	2	2	2	1	1	2	2	2	4	1	1	9
2011	1	2	1	1	1	0	0	1	0	1	1	2	2	2	1	1	1	1	1	2	1	0	0	66
2011	2	1	2	1	1	0	0	1	0	1	2	1	2	2	2	1	1	2	2	2	4	1	1	14
2011	2	1	2	1	1	0	0	1	0	1	1	2	2	2	1	1	1	1	1	2	1	1	1	48
2011	2	1	2	1	2	0	0	1	0	1	1	2	3	2	2	5	5	1	1	2	1	0	0	65
2011	2	1	2	1	2	0	0	1	0	1	1	1	1	3	2	5	5	1	1	2	1	1	1	29
2011	2	1	2	3	1	0	0	1	0	1	2	2	1	2	2	1	1	2	2	2	4	1	1	63
2011	2	1	1	1	1	0	0	2	0	1	1	1	2	2	2	2	2	1	2	3	5	1	1	61
2011	2	1	2	1	2	0	2	2	1	2	1	2	2	2	1	1	1	1	1	2	1	1	1	32
2011	2	1	2	1	1	0	0	1	0	2	2	1	2	2	2	1	1	1	1	2	1	1	1	29
2011	2	1	1	1	1	0	0	1	0	1	1	2	2	2	1	1	1	1	1	2	1	1	1	1
2011	2	1	2	3	2	0	0	2	0	1	1	2	2	2	1	1	1	2	2	2	4	1	1	8
2011	1	1	2	1	1	1	2	1	1	1	1	1	1	2	2	3	3	2	2	2	4	1	1	29
2011	2	1	1	1	1	1	1	1	1	2	1	1	2	2	2	2	2	1	1	2	1	0	0	62
2011	2	1	1	1	2	0	0	1	0	1	1	2	2	2	1	1	1	1	1	2	1	0	0	62
2011	2	3	2	1	1	0	1	2	1	2	1	1	2	2	2	2	2	1	2	2	1	1	1	8
2011	2	2	2	1	2	0	0	1	0	1	1	2	2	2	1	1	1	2	2	2	4	1	1	18
2011	1	1	2	1	1	1	0	1	0	1	2	1	2	2	2	1	1	1	1	1	2	1	1	60
2011	1	2	2	1	2	1	0	1	0	1	2	2	1	2	2	1	1	2	2	1	3	0	0	61
2011	2	1	2	1	2	0	1	2	1	1	1	1	2	2	2	2	2	2	2	2	4	1	1	36
2011	1	1	2	1	1	0	0	1	0	1	1	2	2	2	1	1	1	1	1	2	1	1	1	27
2011	1	1	1	1	1	0	2	1	1	1	1	2	2	2	1	1	1	1	1	2	1	0	0	60
2012	2	1	2	1	2	1	0	1	0	1	2	1	1	2	2	2	2	1	2	2	1	1	1	27
2012	1	3	2	3	1	0	1	1	1	1	2	2	1	2	2	1	1	1	1	1	2	0	0	59
2012	1	3	2	3	2	1	0	2	0	1	1	1	1	2	2	3	3	2	2	1	3	1	1	13
2012	2	1	2	1	2	0	0	1	0	2	2	2	1	2	2	1	1	2	2	2	4	1	1	0
2012	1	1	2	1	2	0	0	1	0	1	1	1	2	2	2	2	2	1	1	2	1	1	1	54
2012	1	3	1	3	2	1	0	1	0	1	1	2	2	2	1	1	1	1	1	2	1	1	1	38
2012	2	1	2	1	2	0	0	1	0	1	1	1	2	2	2	2	2	2	2	2	4	1	1	8
2012	2	1	1	3	1	0	2	1	1	1	1	2	2	2	1	1	1	1	1	2	1	0	0	56
2012	2	1	2	1	2	0	2	2	1	1	1	1	2	2	2	2	2	1	1	1	2	1	1	36
2012	2	2	2	1	2	0	2	1	1	1	2	1	2	2	2	1	1	2	1	2	1	1	1	10
2012	2	1	1	2	2	0	2	2	1	2	1	2	2	2	1	1	1	1	1	2	1	0	0	55
2012	2	3	2	1	2	0	2	2	1	1	1	2	1	2	2	2	2	2	2	2	4	0	0	55
2012	2	1	1	1	1	0	1	1	1	2	2	2	2	2	2	5	0	1	1	2	1	0	0	55
2012	2	1	1	1	1	1	0	1	0	2	1	2	1	2	2	2	2	1	1	2	1	1	1	29
2012	2	1	1	2	2	0	0	1	0	2	2	2	2	2	2	5	0	1	1	2	1	0	0	55
2012	2	2	2	1	2	1	0	1	0	1	2	1	2	2	2	1	1	2	1	2	1	1	1	5
2015	2	1	2	1	2	0	0	1	0	1	1	2	2	2	1	1	1	2	2	2	4	1	1	7
2012	2	1	1	1	1	0	1	1	1	2	2	2	2	2	2	5	0	1	1	2	1	0	0	52
2012	2	2	2	1	2	1	0	1	0	2	1	2	2	2	1	1	1	1	1	2	1	1	1	20
2012	1	1	2	1	1	1	2	1	1	1	1	2	2	2	1	1	1	1	2	1	2	0	0	52
2012	2	1	2	1	2	1	0	1	0	1	1	2	2	2	1	1	1	2	2	1	3	0	0	52
2012	1	1	2	1	2	0	2	1	1	1	1	2	1	2	2	2	2	2	2	2	4	1	1	13
2012	1	1	2	1	2	1	0	1	0	2	1	2	2	2	1	1	1	1	1	2	1	0	0	52
2012	2	1	2	1	1	0	1	1	1	1	2	1	2	2	2	1	1	2	2	2	4	1	1	18
2012	2	1	2	3	2	0	0	1	0	2	1	1	3	2	2	5	5	2	2	3	5	1	1	0
2012	1	1	1	3	1	0	0	2	0	2	1	1	2	2	2	2	2	1	2	2	1	1	1	42
2012	2	1	2	1	1	0	0	1	0	1	2	1	2	2	2	1	1	2	2	2	4	1	1	6
2012	1	1	2	1	2	0	0	1	0	1	2	1	2	2	2	1	1	2	2	1	3	0	0	50
2012	2	1	2	3	2	1	0	1	0	1	1	2	2	2	1	1	1	1	1	2	1	1	1	6
2012	2	1	2	1	2	1	2	1	1	1	2	2	1	2	2	1	1	2	2	1	3	0	0	50
2012	2	1	1	1	2	0	1	2	1	2	1	2	1	2	2	2	2	1	1	2	1	0	0	50
2012	2	1	2	1	1	0	0	1	0	1	1	2	3	2	2	5	5	1	1	1	2	0	0	49
2012	2	1	1	2	1	0	0	1	0	1	2	2	2	2	2	5	0	1	1	2	1	0	0	50
2012	1	1	2	1	2	1	0	1	0	1	1	2	2	2	1	1	1	2	2	1	3	0	0	49
2012	1	1	2	3	1	0	2	1	1	1	2	1	3	2	2	5	5	2	2	1	3	0	0	49
2012	1	1	2	3	2	1	0	2	0	1	1	1	2	2	2	2	2	1	1	1	2	0	0	48
2012	1	1	2	1	2	0	0	1	0	1	1	1	1	2	2	3	3	1	2	1	2	0	0	48
2012	2	1	2	1	1	0	1	1	1	1	1	2	2	2	1	1	1	1	1	2	1	0	0	48
2013	2	1	1	2	2	1	2	1	1	1	1	2	2	2	1	1	1	1	2	2	1	1	1	33
2013	2	3	1	3	2	1	0	1	0	1	2	1	2	2	2	1	1	2	1	2	1	1	1	3
2013	2	1	2	3	2	1	0	1	0	2	2	2	1	2	2	1	1	1	1	2	1	1	1	39
2013	2	1	1	2	1	0	0	2	0	1	1	2	2	1	2	2	2	2	2	1	3	1	1	14
2013	2	1	2	1	2	1	0	1	0	1	1	2	2	2	1	1	1	2	2	2	4	1	1	13
2013	2	1	2	3	2	1	0	1	0	2	1	2	1	2	2	2	2	1	1	2	1	0	0	45
2013	2	1	1	3	2	1	0	1	0	1	1	2	1	1	2	3	3	1	1	2	1	0	0	46
2013	2	1	2	1	2	1	0	2	0	1	2	2	1	1	2	2	2	2	2	1	3	1	1	1
2013	2	2	2	1	2	0	0	1	0	1	1	1	2	2	2	2	2	1	2	2	1	1	1	8
2013	1	1	1	1	2	1	0	1	0	1	1	2	1	2	2	2	2	2	2	1	3	1	1	6
2013	2	1	2	1	2	0	0	2	0	1	1	2	2	2	1	1	1	2	2	2	4	1	1	41
2013	2	3	1	1	1	0	0	2	0	2	1	1	2	2	2	2	2	1	1	2	1	1	1	15
2013	2	1	1	1	1	0	0	2	0	1	1	2	2	2	1	1	1	1	1	1	2	1	1	24
2013	1	1	1	1	1	0	0	2	0	2	1	2	2	2	1	1	1	1	1	2	1	0	0	44
2013	2	1	1	1	2	1	0	1	0	2	1	2	2	2	1	1	1	1	1	2	1	0	0	43
2013	1	1	3	3	1	0	2	2	1	2	1	2	1	2	2	2	2	3	3	3	5	1	1	37
2013	2	1	2	2	1	0	0	1	0	1	1	2	2	2	1	1	1	1	1	1	2	1	1	41
2013	2	3	1	1	2	0	1	1	1	1	2	1	1	2	2	2	2	1	1	2	1	0	0	42
2013	1	1	2	1	1	0	0	1	0	1	2	1	2	2	2	1	1	2	2	1	3	0	0	43
2013	2	1	2	1	1	0	0	1	0	1	2	1	2	2	2	1	1	1	1	1	2	1	1	29
2013	2	1	2	2	2	0	2	2	1	1	1	2	2	2	1	1	1	2	2	2	4	1	1	27
2013	2	1	1	1	1	1	2	1	1	1	1	1	1	2	2	3	3	1	1	2	1	0	0	42
2013	1	1	2	3	1	0	0	2	0	1	1	2	2	2	1	1	1	1	2	1	2	0	0	42
2013	1	1	1	1	1	0	2	1	1	2	1	2	2	2	1	1	1	1	1	2	1	0	0	41
2013	2	1	2	1	1	0	1	1	1	1	2	2	1	2	2	1	1	1	1	2	1	1	1	32
2013	2	1	1	1	1	1	1	1	1	2	1	2	2	2	1	1	1	1	1	2	1	0	0	40
2013	2	1	1	1	2	1	2	1	1	2	1	2	2	2	1	1	1	1	1	2	1	0	1	23
2013	2	1	1	1	1	0	0	1	0	1	1	2	1	2	2	2	2	1	1	2	1	0	0	40
2013	2	1	2	3	2	0	2	1	1	1	2	2	1	2	2	1	1	1	1	2	1	0	0	39
2013	2	1	2	1	2	0	0	1	0	1	2	3	1	2	2	5	5	2	2	2	4	1	1	5
2013	1	1	2	1	2	1	2	1	1	1	1	2	1	2	2	2	2	1	1	2	1	1	1	18
2013	1	1	2	1	2	1	0	1	0	1	2	2	3	1	2	5	5	2	2	3	5	1	1	5
2013	1	1	2	1	1	0	0	1	0	1	1	2	2	2	1	1	1	1	1	1	2	0	0	38
2013	1	1	2	1	1	0	0	2	0	1	1	2	2	2	1	1	1	1	1	1	2	0	0	37
2013	2	1	1	1	2	0	0	1	0	1	1	2	2	2	1	1	1	2	2	2	4	1	1	11
2013	2	1	2	1	2	0	0	1	0	1	2	1	2	2	2	1	1	2	2	1	3	0	0	38
2013	2	3	2	1	2	1	0	1	0	1	2	1	1	2	2	2	2	2	2	2	4	1	1	0
2013	2	1	2	1	2	0	0	1	0	1	1	2	2	2	1	1	1	1	1	2	1	1	1	32
2013	2	1	2	1	2	1	2	1	1	2	1	1	2	2	2	2	2	1	2	1	2	1	1	21
2013	2	1	2	1	2	1	0	1	0	2	1	2	2	2	1	1	1	1	1	2	1	0	0	37
2013	2	1	2	1	1	0	1	2	1	2	1	2	2	2	1	1	1	1	2	2	1	1	1	35
2013	2	1	2	1	1	0	0	2	0	2	1	2	1	2	2	2	2	3	3	2	5	1	1	1
2013	1	1	2	1	1	0	0	1	0	1	1	1	3	3	2	5	5	1	1	1	2	0	0	37
2014	1	1	2	1	1	1	0	1	0	1	2	1	2	2	2	1	1	1	1	1	2	0	0	35
2014	2	1	1	1	1	0	0	1	0	1	1	2	2	2	1	1	1	1	1	2	1	0	0	35
2014	2	1	2	1	2	1	2	1	1	1	1	2	1	2	2	2	2	1	1	2	1	0	0	35
2013	2	1	2	1	2	1	0	1	0	1	2	2	2	2	2	5	0	1	1	1	2	0	0	36
2013	2	1	1	1	2	1	0	1	0	1	1	2	1	2	2	2	2	1	1	1	2	0	0	38
2014	2	1	1	3	1	0	0	1	0	1	1	2	2	2	1	1	1	1	2	1	2	0	0	35
2014	2	3	2	1	2	0	1	2	1	1	2	2	1	2	2	1	1	2	2	2	4	1	1	31
2014	2	1	2	1	1	1	0	1	0	2	1	2	2	2	1	1	1	1	1	1	2	1	1	16
2014	2	1	2	1	2	0	0	1	0	1	1	2	2	2	1	1	1	1	1	2	1	0	0	34
2014	2	1	1	1	2	1	0	1	0	1	2	2	2	2	2	5	0	1	1	2	1	0	0	34
2014	1	1	2	1	1	1	2	1	1	1	1	2	2	2	1	1	1	1	1	1	2	1	1	5
2014	2	1	1	1	1	0	0	2	0	1	2	2	1	2	2	1	1	1	1	1	2	0	0	33
2014	2	3	1	1	1	0	0	2	0	1	1	1	2	2	2	2	2	1	1	2	1	0	0	33
2014	2	1	1	1	1	0	2	1	1	1	2	1	2	2	2	1	1	1	2	1	2	0	0	34
2014	2	2	1	2	1	0	0	2	0	1	1	1	1	2	2	3	3	1	1	2	1	1	1	8
2014	2	1	1	1	2	0	0	1	0	2	1	2	2	2	1	1	1	1	2	2	1	0	0	32
2014	1	3	2	1	1	1	0	2	0	1	3	3	3	1	2	5	5	2	2	1	3	1	1	29
2014	2	1	1	1	1	0	0	2	0	2	1	2	2	2	1	1	1	1	1	2	1	0	0	32
2014	1	1	2	3	1	0	0	1	0	1	2	1	2	2	2	1	1	1	1	2	1	0	0	32
2014	2	1	2	1	1	0	2	1	1	1	2	2	2	2	2	5	0	1	2	2	1	1	1	11
2014	2	1	2	1	1	0	0	2	0	1	1	1	2	2	2	2	2	2	2	1	3	1	1	25
2014	2	1	1	1	2	1	1	1	1	1	2	2	1	2	2	1	1	1	1	2	1	0	0	31
2014	2	1	1	1	2	1	0	1	0	1	2	1	2	2	2	1	1	1	1	2	1	0	0	31
2014	1	1	2	1	1	0	0	1	0	1	1	2	2	2	1	1	1	1	2	1	2	0	0	31
2014	1	1	2	1	2	0	0	1	0	1	2	1	1	2	2	2	2	1	1	2	1	1	1	15
2014	2	1	2	3	2	0	2	2	1	1	1	2	2	2	1	1	1	1	1	2	1	0	0	31
2014	2	1	2	1	2	1	2	1	1	1	2	3	1	2	2	5	5	2	1	2	1	0	0	30
2014	2	1	1	3	2	1	0	1	0	2	1	2	2	2	1	1	1	1	1	2	1	1	1	25
2014	2	1	2	1	2	1	0	2	0	2	1	2	2	2	1	1	1	1	2	2	1	1	1	26
2014	2	1	2	1	2	1	0	1	0	1	3	3	3	3	2	5	5	1	1	2	1	0	0	30
2014	1	1	1	1	2	1	0	1	0	1	1	2	2	2	1	1	1	1	1	2	1	0	0	30
2014	2	1	2	3	2	0	2	2	1	1	2	1	2	2	2	1	1	2	2	1	3	0	0	30
2014	2	1	2	3	2	0	0	1	0	2	1	1	2	2	2	2	2	2	2	2	4	1	1	15
2014	2	1	2	1	2	0	0	1	0	1	1	3	1	2	2	5	5	1	1	2	1	0	0	29
2014	2	1	1	1	2	1	0	1	0	1	1	2	2	2	1	1	1	1	1	2	1	1	1	16
2014	2	1	1	1	1	0	0	1	0	2	2	2	1	2	2	1	1	1	2	2	1	0	0	30
2014	2	1	2	1	1	1	0	1	0	1	1	2	2	2	1	1	1	1	2	1	2	0	0	29
2014	1	3	2	1	2	0	0	2	0	1	1	1	2	3	2	5	5	1	1	1	2	0	0	29
2014	2	1	1	3	2	0	2	1	1	2	1	2	2	2	1	1	1	1	2	2	1	1	1	18
2014	2	1	2	1	1	0	0	1	0	2	2	1	2	2	2	1	1	2	2	1	3	1	1	1
2014	2	1	1	3	1	0	0	1	0	2	1	2	2	2	1	1	1	1	1	1	2	0	0	27
2014	1	1	1	1	1	1	0	1	0	2	1	2	2	2	1	1	1	1	1	2	1	0	0	27
2014	2	1	2	1	1	0	0	1	0	1	2	2	1	2	2	1	1	2	2	2	4	0	0	27
2014	2	1	2	3	2	0	0	2	0	2	1	2	2	2	1	1	1	3	3	3	5	0	0	28
2014	2	1	2	1	1	0	0	1	0	2	1	1	2	2	2	2	2	1	1	1	2	1	1	0
2014	2	1	2	3	1	0	1	1	1	1	2	2	1	2	2	1	1	2	2	2	4	0	0	26
2014	1	2	2	1	2	0	2	1	1	1	2	2	2	1	2	1	1	2	2	2	4	1	1	9
2014	1	1	1	1	2	0	1	2	1	1	1	2	2	2	1	1	1	2	2	1	3	0	0	26
2014	2	1	1	1	1	0	0	1	0	1	1	2	2	2	1	1	1	1	1	2	1	0	0	25
2014	2	1	1	2	2	0	2	2	1	1	2	2	2	2	2	5	0	1	2	2	1	0	0	25
2014	2	1	1	1	2	0	2	1	1	1	2	2	2	2	2	5	0	1	2	2	1	0	0	25
2014	2	1	1	1	2	0	0	2	0	1	1	1	1	2	2	3	3	1	1	2	1	0	0	24
2015	2	1	2	1	1	0	0	1	0	1	1	2	2	2	1	1	1	1	1	1	2	0	0	23
2015	2	3	1	1	1	0	0	1	0	1	1	2	2	2	1	1	1	2	2	2	4	1	1	23
2015	2	1	2	1	2	0	0	1	0	2	2	2	2	2	2	5	0	2	2	2	4	1	1	0
2015	2	2	2	1	1	0	0	1	0	1	1	2	2	2	1	1	1	1	1	2	1	0	0	22
2015	2	1	2	1	2	0	0	1	0	1	1	1	2	2	2	2	2	2	2	3	5	0	0	22
2015	2	1	2	1	2	0	2	2	1	1	2	2	1	2	2	1	1	1	1	1	2	0	0	23
2015	1	1	1	2	2	0	0	1	0	2	1	2	2	2	1	1	1	1	1	2	1	0	0	22
2015	1	1	1	1	1	0	0	1	0	1	2	1	2	2	2	1	1	1	1	2	1	0	0	21
2015	2	1	2	2	2	1	0	1	0	1	1	2	3	2	2	5	5	1	1	2	1	0	0	21
2015	2	2	1	2	2	1	0	2	0	1	1	2	2	2	1	1	1	1	1	2	1	1	1	5
2015	2	1	1	3	1	1	2	1	1	2	1	2	2	2	1	1	1	1	1	2	1	0	0	21
2015	2	1	1	1	1	1	0	1	0	1	2	1	2	2	2	1	1	1	1	1	2	0	0	20
2015	2	1	1	1	1	0	0	1	0	1	1	2	2	2	1	1	1	1	1	2	1	0	0	22
2015	2	1	2	2	2	1	0	1	0	2	1	2	2	2	1	1	1	1	1	2	1	0	0	20
2015	2	1	1	1	2	0	0	1	0	1	1	2	1	2	2	2	2	1	1	2	1	0	0	19
2015	1	1	2	3	2	0	2	2	1	1	2	2	2	2	2	5	0	1	1	2	1	0	0	10
2015	2	1	1	1	2	1	0	2	0	1	1	2	2	2	1	1	1	1	1	2	1	0	0	19
2015	2	1	1	1	1	0	0	2	0	1	1	2	2	2	1	1	1	1	1	2	1	0	0	19
2015	2	1	2	1	2	0	2	2	1	1	2	1	1	2	2	2	2	1	1	2	1	0	0	19
2015	2	1	2	1	1	0	1	1	1	1	1	2	2	2	1	1	1	2	2	2	4	0	0	20
2015	2	1	1	2	1	0	0	2	0	2	1	2	2	2	1	1	1	1	2	2	1	0	0	18
2015	2	1	2	3	2	1	0	2	0	1	1	2	2	2	1	1	1	1	2	1	2	0	0	18
2015	1	1	2	1	1	1	0	1	0	1	3	1	2	2	2	5	5	1	2	1	2	0	0	18
2015	2	1	2	1	1	0	0	1	0	2	2	2	2	2	2	5	0	1	2	2	1	0	0	19
2015	2	1	1	3	1	0	0	1	0	1	2	1	2	2	2	1	1	2	2	1	3	1	1	0
2015	1	3	2	1	1	0	0	2	0	1	2	2	2	1	2	1	1	2	2	2	4	1	1	5
2015	1	1	1	2	1	0	0	1	0	1	1	2	2	2	1	1	1	1	1	2	1	0	0	18
2015	2	3	2	1	2	1	0	1	0	2	1	2	2	2	1	1	1	1	1	2	1	1	1	18
2015	1	1	2	1	2	0	2	1	1	1	2	2	1	2	2	1	1	2	2	1	3	0	0	18
2015	2	1	1	1	2	0	0	1	0	1	2	1	1	2	2	2	2	1	1	2	1	0	0	17
2015	2	1	2	1	2	0	0	1	0	1	1	2	1	2	2	2	2	1	1	2	1	1	1	9
2015	1	1	2	3	2	1	0	2	0	2	2	2	2	2	2	5	0	1	2	2	1	1	1	0
2015	2	1	2	1	1	0	1	2	1	1	1	1	2	2	2	2	2	1	1	1	2	0	0	16
2015	1	1	1	2	1	0	1	1	1	1	2	1	2	2	2	1	1	2	1	2	1	0	0	15
2015	2	1	1	1	2	1	0	1	0	1	1	2	2	2	1	1	1	2	2	2	4	0	0	15
2015	2	1	1	1	2	0	2	1	1	1	1	2	2	2	1	1	1	1	1	2	1	0	0	15
2015	2	1	2	1	2	1	0	1	0	1	1	2	2	2	1	1	1	2	2	1	3	0	0	16
2015	2	1	2	1	2	1	0	1	0	1	1	2	1	2	2	2	2	1	1	2	1	0	0	14
2015	1	3	2	3	2	1	0	1	0	1	1	2	1	2	2	2	2	1	1	2	1	0	0	14
2015	2	1	2	1	2	0	2	1	1	1	2	1	1	2	2	2	2	2	2	1	3	0	0	13
2015	2	1	1	2	1	0	0	2	0	2	2	2	2	1	2	1	1	1	2	2	1	0	0	13
2015	2	1	1	3	2	0	2	2	1	1	1	1	2	2	2	2	2	1	2	2	1	0	0	14
2015	2	1	2	1	2	1	0	1	0	1	2	1	1	2	2	2	2	2	2	1	3	0	0	12
2015	2	1	1	1	1	0	2	1	1	1	2	2	1	2	2	1	1	1	1	1	2	0	0	12
2015	2	1	2	1	1	0	2	1	1	1	2	1	2	2	2	1	1	2	2	1	3	1	1	1
2015	2	1	2	3	2	0	0	1	0	1	1	2	2	2	1	1	1	1	1	2	1	0	0	11
2015	2	1	1	1	2	0	0	1	0	1	1	2	2	2	1	1	1	1	1	2	1	0	0	17
2010	2	1	1	1	2	0	0	1	0	1	3	2	1	3	2	5	5	2	2	1	3	1	1	22
2010	1	1	1	1	2	0	2	2	1	2	1	2	2	2	1	1	1	1	1	2	1	1	1	35
2010	2	1	1	2	1	0	2	1	1	1	2	2	2	2	2	5	0	1	1	2	1	1	1	43
2010	2	1	1	3	2	1	2	2	1	1	2	2	2	2	2	5	0	1	1	3	5	1	1	28
2010	2	1	2	1	1	0	0	2	0	1	1	2	2	2	1	1	1	1	1	1	2	1	1	27
2010	2	1	1	3	2	0	0	1	0	1	2	2	1	2	2	1	1	1	2	2	1	1	1	54
2010	1	1	1	1	2	0	2	2	1	1	2	2	2	2	2	5	0	1	2	1	2	0	0	78
2010	1	1	2	3	1	0	2	1	1	1	2	2	1	2	2	1	1	2	2	2	4	0	0	78
2010	2	1	1	1	1	0	0	1	0	2	2	2	2	2	2	5	0	3	3	3	5	1	1	0
2010	1	1	2	1	1	1	2	1	1	1	2	2	2	2	2	5	0	2	2	3	5	1	1	22
2010	2	1	2	1	2	1	0	1	0	1	2	2	2	2	2	5	0	2	2	1	3	0	0	75
2010	2	1	2	1	1	0	2	1	1	1	2	2	1	2	2	1	1	1	1	2	1	1	1	39
2010	2	1	2	1	1	0	0	1	0	1	1	2	2	2	1	1	1	1	1	2	1	1	1	50
2011	2	1	1	1	1	0	2	1	1	1	2	2	1	2	2	1	1	1	1	1	2	0	0	71
2011	2	1	2	3	2	0	2	1	1	1	2	2	2	2	2	5	0	2	2	3	5	1	1	54
2011	2	1	2	3	2	1	0	1	0	1	1	1	2	1	2	3	3	2	2	2	4	1	1	5
2010	1	1	1	1	2	0	0	1	0	1	1	2	2	2	1	1	1	1	1	2	1	0	0	78
2011	2	1	1	1	1	0	0	1	0	1	1	2	2	2	1	1	1	1	1	2	1	0	1	9
2010	1	1	2	3	2	0	2	1	1	1	2	2	2	2	2	5	0	2	2	2	4	1	1	11
2010	2	1	2	1	2	1	2	1	1	1	2	2	2	2	2	5	0	2	2	2	4	1	1	41
2010	2	1	3	2	2	0	2	2	1	1	1	2	2	2	1	1	1	1	1	2	1	0	0	82
2010	2	1	1	1	2	0	2	1	1	1	2	2	1	2	2	1	1	3	3	3	5	0	0	81
2010	2	1	1	1	2	1	2	1	1	2	1	3	3	3	2	5	5	1	1	2	1	1	1	21
2010	2	1	2	3	2	1	2	1	1	2	1	1	2	1	2	3	3	1	1	1	2	1	1	1
2011	1	1	1	1	1	1	1	1	1	1	1	2	2	2	1	1	1	1	1	2	1	0	0	68
2011	1	1	2	1	1	0	2	1	1	1	2	2	1	2	2	1	1	2	2	2	4	1	1	11
2011	2	1	2	1	2	0	0	1	0	1	2	2	2	1	2	1	1	2	2	3	5	1	1	5
2011	2	1	2	2	1	0	0	1	0	2	2	2	1	2	2	1	1	2	2	2	4	1	1	0
2011	2	1	2	3	1	1	2	1	1	2	2	2	2	1	2	1	1	1	2	1	2	0	0	59
2011	2	1	2	1	2	0	0	1	0	1	2	1	2	2	2	1	1	1	2	1	2	1	1	0
2011	1	1	1	1	1	0	0	1	0	1	1	2	2	2	1	1	1	1	1	2	1	0	0	61
2011	2	1	2	1	1	0	1	1	1	1	2	2	1	2	2	1	1	2	2	2	4	1	1	15
2011	1	1	2	1	2	1	0	1	0	1	1	3	2	1	2	5	5	1	1	1	2	0	0	62
2011	2	1	1	1	2	1	2	1	1	1	1	2	2	2	1	1	1	1	2	2	1	1	1	22
2011	2	1	1	1	1	0	0	1	0	1	2	2	1	2	2	1	1	2	2	2	4	1	1	13
2011	2	1	1	1	1	0	2	1	1	1	1	2	2	2	1	1	1	1	2	2	1	1	1	18
2011	2	1	2	1	1	1	2	1	1	1	1	1	2	2	2	2	2	1	2	1	2	1	1	20
2011	2	1	1	1	2	1	2	1	1	1	1	2	2	2	1	1	1	1	1	1	2	0	0	60
2012	1	1	2	1	2	0	0	2	0	1	1	1	2	2	2	2	2	3	3	1	5	1	1	50
2012	2	1	2	1	2	1	0	2	0	2	1	2	3	1	2	5	5	1	1	2	1	1	1	34
2012	2	1	1	1	2	0	2	2	1	1	1	2	1	2	2	2	2	1	2	2	1	0	0	53
2012	2	1	2	2	1	0	0	2	0	1	1	2	2	2	1	1	1	1	2	2	1	1	1	5
2012	2	1	1	2	2	0	2	1	1	1	1	2	2	2	1	1	1	1	1	2	1	0	1	33
2012	2	1	2	1	1	0	1	2	1	2	2	2	2	2	2	5	0	1	1	2	1	1	1	56
2012	2	1	2	1	1	1	1	1	1	2	1	1	2	2	2	2	2	1	2	2	1	1	1	34
2012	2	1	1	3	2	1	2	2	1	1	2	2	2	2	2	5	0	1	1	1	2	0	0	58
2012	2	1	1	1	1	0	0	1	0	1	1	2	2	2	1	1	1	1	1	2	1	0	0	53
2012	2	1	1	2	2	1	0	1	0	2	1	2	2	2	1	1	1	1	1	2	1	1	1	36
2012	2	1	2	3	2	0	2	1	1	2	1	2	1	2	2	2	2	2	2	1	3	1	1	5
2012	2	1	1	1	1	0	1	1	1	2	2	1	2	2	2	1	1	1	2	2	1	0	0	48
2011	2	1	1	1	1	1	1	1	1	1	1	1	2	2	2	2	2	1	1	2	1	1	1	20
2013	2	1	1	1	1	1	2	1	1	2	1	2	1	2	2	2	2	1	1	1	2	0	0	47
2013	1	1	1	1	1	0	0	2	0	1	1	2	2	1	2	2	2	2	2	2	4	1	1	21
2013	2	1	2	1	2	1	0	1	0	1	1	1	1	1	2	4	4	1	2	1	2	1	1	24
2014	1	1	2	1	1	0	0	1	0	1	1	2	2	2	1	1	1	1	1	2	1	0	0	33
2013	2	1	1	3	1	0	0	1	0	1	1	1	2	3	2	5	5	1	1	2	1	1	1	1
2013	2	1	1	1	2	1	0	1	0	1	2	1	2	2	2	1	1	2	2	1	3	0	0	41
2013	2	1	1	1	1	0	2	1	1	1	1	2	2	2	1	1	1	1	1	2	1	1	1	7
2013	1	1	1	2	2	0	2	1	1	1	1	1	2	2	2	2	2	1	1	2	1	0	0	41
2013	2	1	1	1	2	0	2	1	1	1	1	2	1	2	2	2	2	1	1	2	1	0	0	42
2013	2	1	2	1	2	0	2	2	1	1	2	2	2	2	2	5	0	1	2	1	2	0	0	38
2014	2	1	2	1	1	0	0	2	0	2	1	2	2	2	1	1	1	1	1	1	2	1	1	16
2014	2	1	1	1	2	0	0	1	0	1	1	1	1	2	2	3	3	2	2	1	3	0	0	33
2013	2	1	2	1	1	0	1	1	1	1	1	2	2	2	1	1	1	1	1	2	1	0	0	43
2013	2	1	2	1	2	1	0	1	0	1	2	2	2	2	2	5	0	2	2	1	3	0	0	41
2014	1	1	1	1	1	0	0	1	0	1	1	1	2	2	2	2	2	1	2	1	2	1	1	24
2014	2	1	2	1	1	1	1	1	1	1	1	2	2	2	1	1	1	1	1	1	2	0	0	35
2013	2	1	1	1	1	0	2	2	1	1	1	2	2	2	1	1	1	1	2	2	1	1	1	20
2014	2	1	2	1	2	0	2	2	1	1	2	1	2	2	2	1	1	2	2	1	3	0	0	34
2014	1	1	2	1	2	0	2	1	1	1	2	1	1	2	2	2	2	2	2	2	4	0	1	11
2015	1	1	1	1	1	0	1	1	1	1	2	1	2	2	2	1	1	2	2	1	3	0	0	22
2014	1	1	2	2	2	0	2	1	1	2	2	1	1	2	2	2	2	2	2	2	4	1	1	5
2014	2	1	2	1	1	1	1	2	1	1	2	2	1	2	2	1	1	1	2	2	1	0	0	25
2014	2	1	2	3	2	0	0	2	0	2	1	2	1	2	2	2	2	1	1	2	1	1	1	25
2015	2	1	1	2	2	1	0	1	0	2	1	2	2	2	1	1	1	1	1	2	1	0	0	20
2014	2	1	2	1	2	0	0	1	0	1	2	2	1	2	2	1	1	2	2	1	3	0	0	33
2015	1	1	2	1	1	1	2	1	1	1	2	2	1	2	2	1	1	3	3	2	5	0	0	18
2014	2	1	2	3	1	0	0	1	0	1	1	2	2	2	1	1	1	1	1	2	1	1	1	15
2014	2	1	2	1	1	0	0	1	0	1	1	1	2	3	2	5	5	1	1	2	1	1	1	10
2014	1	1	1	1	2	1	0	1	0	1	2	2	2	1	2	1	1	3	3	1	5	0	0	33
2014	2	1	1	2	2	1	2	1	1	2	1	2	2	2	1	1	1	1	1	2	1	0	0	28
2014	1	1	1	1	2	0	2	2	1	2	1	2	2	2	1	1	1	1	1	2	1	1	1	24
2014	1	1	2	2	2	0	0	1	0	1	1	1	2	2	2	2	2	1	1	2	1	0	0	17
2014	2	1	1	1	1	0	2	1	1	2	1	2	2	2	1	1	1	1	1	2	1	0	0	32
2015	1	1	1	1	2	0	2	1	1	1	2	2	1	2	2	1	1	2	2	2	4	0	0	20
2015	2	1	2	1	1	1	1	1	1	2	2	2	2	2	2	5	0	1	1	1	2	0	0	15
2015	1	1	2	1	2	0	0	1	0	1	1	1	2	1	2	3	3	1	1	2	1	1	1	14
2015	1	1	2	1	1	0	1	1	1	1	2	1	2	2	2	1	1	1	1	1	2	0	0	18
2015	2	1	1	1	1	0	0	1	0	1	2	2	1	2	2	1	1	1	1	1	2	0	0	17
2015	2	1	2	1	1	0	0	2	0	1	1	1	2	2	2	2	2	1	1	1	2	0	0	12
2015	2	1	1	1	2	1	0	1	0	1	1	1	1	2	2	3	3	1	2	2	1	0	0	16
2015	2	1	2	1	2	0	0	1	0	2	1	2	1	2	2	2	2	3	3	3	5	1	1	3
2015	1	1	2	1	1	0	0	1	0	2	2	2	2	2	2	5	0	1	1	2	1	1	1	12
2015	2	1	2	1	2	0	0	1	0	2	2	2	1	2	2	1	1	2	2	2	4	1	1	0
2015	2	1	2	1	1	0	0	1	0	1	1	2	2	2	1	1	1	1	1	2	1	0	0	20
2015	2	1	1	1	2	0	2	1	1	1	1	1	2	2	2	2	2	1	1	2	1	1	1	7
2015	2	1	1	2	2	1	0	1	0	1	1	2	2	2	1	1	1	1	2	2	1	1	1	16
2015	2	1	2	3	2	1	0	1	0	1	2	2	1	2	2	1	1	1	1	1	2	0	0	20
2015	2	1	1	2	2	1	2	1	1	1	1	2	2	2	1	1	1	1	1	2	1	0	0	22
2015	1	1	1	1	2	1	2	1	1	1	1	2	2	2	1	1	1	1	1	2	1	0	0	14
2015	2	1	2	1	2	0	0	1	0	1	1	2	2	2	1	1	1	3	3	3	5	1	1	4
2015	2	1	2	1	1	0	0	1	0	2	2	2	1	2	2	1	1	1	2	1	2	1	1	10
2015	2	1	2	1	2	0	1	1	1	1	1	2	2	2	1	1	1	1	1	1	2	0	0	13
2010	2	2	2	1	1	0	0	1	0	1	1	1	2	2	2	2	2	1	2	1	2	1	1	1
2010	2	2	2	1	2	0	2	2	1	1	2	2	1	2	2	1	1	1	1	2	1	1	1	27
2010	2	2	1	2	1	1	0	1	0	1	1	2	2	2	1	1	1	1	1	2	1	1	1	48
2010	2	2	2	1	2	0	0	1	0	1	2	2	1	2	2	1	1	2	2	2	4	1	1	2
2010	2	2	2	2	2	0	0	1	0	2	1	2	2	2	1	1	1	1	2	2	1	0	0	52
2010	1	1	2	1	1	0	1	2	1	2	1	2	2	2	1	1	1	1	1	2	1	1	1	44
2010	2	2	1	1	1	0	2	1	1	1	2	1	2	2	2	1	1	1	2	1	2	1	1	27
2010	2	2	2	2	1	0	0	1	0	1	1	2	1	2	2	2	2	1	1	2	1	1	1	29
2010	2	2	2	1	2	1	0	1	0	2	1	2	2	2	1	1	1	1	2	1	2	1	1	41
2010	2	1	2	1	2	0	0	1	0	1	2	2	2	2	2	5	0	2	2	2	4	1	1	6
2010	1	2	2	1	2	1	0	1	0	1	1	1	1	2	2	3	3	2	2	2	4	1	1	3
2010	2	1	2	1	2	0	2	1	1	1	2	1	2	2	2	1	1	1	1	1	2	0	0	83
2010	1	1	1	3	2	1	2	1	1	1	2	2	2	2	2	5	0	1	1	2	1	0	0	79
2010	2	1	2	3	2	1	0	1	0	1	2	2	2	2	2	5	0	1	1	2	1	1	1	4
2010	2	1	2	1	1	0	0	1	0	2	1	2	1	1	2	3	3	1	1	2	1	1	1	37
2010	2	1	2	1	2	1	2	1	1	2	1	2	2	2	1	1	1	1	2	3	5	1	1	14
2010	1	1	1	1	1	0	2	1	1	1	2	2	1	2	2	1	1	1	1	2	1	1	1	63
2010	1	2	2	1	2	0	0	1	0	1	1	1	1	2	2	3	3	2	2	1	3	0	0	76
2010	1	2	1	3	2	0	0	1	0	1	1	3	1	1	2	5	5	2	2	2	4	1	1	10
2010	2	1	1	2	2	0	0	2	0	2	2	2	2	2	2	5	0	1	1	2	1	1	1	66
2010	2	2	2	3	1	0	0	2	0	1	1	2	2	2	1	1	1	1	2	2	1	1	1	38
2010	2	2	1	2	1	0	2	2	1	1	2	1	2	2	2	1	1	1	1	2	1	1	1	63
2010	2	1	2	1	2	1	2	1	1	1	1	2	2	2	1	1	1	1	1	3	5	1	1	76
2010	2	2	2	1	2	0	2	2	1	1	2	2	1	2	2	1	1	1	1	1	2	1	1	19
2010	1	1	2	1	2	1	2	1	1	1	2	1	1	2	2	2	2	1	2	2	1	1	1	6
2010	1	1	2	1	2	1	2	1	1	1	1	1	2	2	2	2	2	1	2	2	1	1	1	21
2011	2	2	1	1	2	0	0	2	0	1	2	2	2	2	2	5	0	2	2	1	3	1	1	25
2010	1	2	2	1	2	0	0	2	0	1	1	2	2	1	2	2	2	1	1	1	2	1	1	19
2010	1	2	2	1	2	1	0	1	0	1	2	2	1	2	2	1	1	1	2	1	2	1	1	17
2011	2	2	2	1	1	0	2	1	1	1	1	2	2	2	1	1	1	1	2	2	1	0	0	48
2011	2	2	2	1	2	1	0	1	0	1	1	2	2	2	1	1	1	1	1	2	1	0	1	20
2011	2	2	2	1	2	0	0	2	0	1	2	1	1	2	2	2	2	1	1	1	2	1	1	26
2011	2	1	1	1	1	0	0	1	0	1	2	1	2	2	2	1	1	1	1	1	2	1	1	29
2011	2	2	2	1	2	0	0	1	0	1	1	2	2	2	1	1	1	2	2	2	4	1	1	4
2010	1	2	2	1	2	1	0	1	0	1	2	2	1	2	2	1	1	2	2	1	3	1	1	14
2011	1	2	2	1	2	0	2	2	1	1	1	2	2	2	1	1	1	1	1	1	2	0	0	65
2010	2	1	2	2	2	0	0	2	0	1	1	2	2	2	1	1	1	3	3	2	5	1	1	5
2011	1	2	1	1	1	1	2	1	1	1	2	2	1	2	2	1	1	1	2	1	2	0	0	66
2011	1	1	2	1	2	1	0	2	0	1	2	2	2	1	2	1	1	2	2	2	4	1	1	4
2011	2	1	3	1	2	0	2	1	1	1	2	2	1	2	2	1	1	1	2	2	1	1	1	16
2011	1	1	2	1	2	0	0	2	0	2	1	2	2	2	1	1	1	1	1	2	1	1	1	48
2011	2	2	1	1	2	1	2	1	1	1	2	2	1	2	2	1	1	2	2	2	4	1	1	11
2011	2	1	1	1	2	1	2	1	1	1	1	2	2	2	1	1	1	1	2	3	5	0	0	67
2011	2	1	2	1	2	1	0	1	0	1	1	1	2	2	2	2	2	1	1	2	1	1	1	7
2011	1	1	1	1	1	1	2	1	1	1	1	2	2	2	1	1	1	1	1	2	1	1	1	27
2011	2	2	2	1	1	0	0	1	0	2	1	2	1	2	2	2	2	1	1	2	1	1	1	20
2011	2	1	2	1	2	0	1	1	1	2	2	2	1	2	2	1	1	1	1	2	1	0	0	63
2011	1	2	2	1	1	0	2	1	1	1	2	1	2	2	2	1	1	1	1	1	2	1	1	22
2011	2	2	1	1	2	0	0	1	0	1	1	2	2	2	1	1	1	1	2	1	2	1	1	30
2011	1	2	2	1	1	0	0	2	0	2	1	2	2	2	1	1	1	1	2	2	1	1	1	27
2011	2	2	2	1	2	1	2	2	1	1	2	1	2	2	2	1	1	1	2	2	1	1	1	17
2011	1	2	1	1	2	0	1	2	1	1	1	2	2	2	1	1	1	2	2	2	4	1	1	13
2011	2	2	2	3	1	0	0	1	0	1	1	2	2	2	1	1	1	1	1	1	2	0	0	60
2011	1	2	2	1	1	0	0	1	0	1	1	1	2	2	2	2	2	2	2	1	3	0	0	63
2011	2	1	1	1	2	0	0	1	0	1	2	2	1	2	2	1	1	2	2	1	3	1	1	20
2011	2	2	2	1	2	1	2	1	1	1	2	1	2	2	2	1	1	1	2	2	1	0	1	20
2011	2	2	1	1	2	0	2	1	1	1	1	2	2	2	1	1	1	1	1	2	1	1	1	52
2011	2	2	2	1	1	0	0	2	0	2	1	1	1	2	2	3	3	1	1	2	1	0	0	11
2010	2	2	2	1	2	1	0	1	0	1	1	2	2	2	1	1	1	1	1	2	1	1	1	0
2011	1	2	2	1	2	0	2	1	1	1	2	2	1	2	2	1	1	1	2	2	1	1	1	19
2011	1	2	1	1	2	0	2	2	1	1	1	2	1	2	2	2	2	1	1	3	5	1	1	50
2011	1	2	2	1	2	0	1	1	1	1	2	1	2	2	2	1	1	2	2	2	4	1	1	26
2011	2	1	1	3	1	0	0	2	0	2	1	2	2	2	1	1	1	1	1	2	1	1	1	22
2011	1	1	1	1	1	0	1	1	1	1	2	2	2	2	2	5	0	1	1	1	2	0	0	6
2010	2	1	3	1	2	1	2	1	1	2	2	2	2	2	2	5	0	1	1	3	5	0	0	81
2012	2	1	2	2	1	0	0	1	0	1	1	2	2	2	1	1	1	1	2	2	1	1	1	17
2012	1	2	2	1	2	0	0	2	0	1	1	1	2	2	2	2	2	1	1	1	2	0	0	58
2012	2	2	2	1	2	0	1	1	1	1	1	1	2	3	2	5	5	1	2	2	1	1	1	20
2012	1	1	2	3	2	0	2	1	1	1	1	2	2	2	1	1	1	2	2	1	3	0	0	5
2012	1	2	3	1	1	0	2	1	1	1	1	1	2	2	2	2	2	1	1	1	2	1	1	47
2012	2	1	1	1	1	0	2	1	1	1	2	2	1	2	2	1	1	1	1	2	1	1	1	34
2012	2	2	1	1	1	0	1	1	1	1	1	2	2	2	1	1	1	1	1	1	2	0	0	55
2012	1	1	1	1	1	0	0	1	0	2	1	2	2	2	1	1	1	1	2	2	1	1	1	53
2012	1	2	2	1	2	0	2	1	1	1	2	2	2	2	2	5	0	2	2	2	4	1	1	16
2012	2	2	1	1	2	1	2	1	1	1	1	1	2	2	2	2	2	1	1	1	2	1	1	20
2012	2	2	2	1	2	1	0	1	0	1	1	1	2	2	2	2	2	2	2	1	3	1	1	42
2012	2	2	2	1	1	1	1	1	1	1	2	1	1	2	2	2	2	1	2	2	1	1	1	15
2012	1	1	1	1	1	0	0	1	0	1	1	2	2	2	1	1	1	1	1	1	2	0	0	55
2012	2	2	2	1	2	0	2	1	1	1	1	2	2	2	1	1	1	1	2	1	2	0	0	53
2012	1	2	2	2	2	0	0	1	0	1	1	2	2	2	1	1	1	2	2	1	3	1	1	28
2012	1	2	2	1	1	1	0	1	0	1	2	2	2	2	2	5	0	1	2	1	2	0	0	55
2012	2	2	2	1	1	0	1	1	1	2	1	2	2	2	1	1	1	1	1	2	1	1	1	17
2012	1	2	2	1	2	1	0	2	0	2	1	2	2	2	1	1	1	1	1	2	1	1	1	44
2012	2	1	2	3	1	1	0	2	0	1	1	1	1	2	2	3	3	1	2	1	2	1	1	17
2012	1	1	2	1	2	1	0	1	0	1	1	2	2	2	1	1	1	1	1	3	5	1	1	27
2012	1	1	1	3	1	1	0	2	0	2	1	2	2	2	1	1	1	1	1	2	1	0	0	52
2012	1	3	2	1	1	0	0	2	0	2	1	2	2	2	1	1	1	1	1	2	1	0	0	52
2012	2	2	2	1	2	1	0	1	0	1	2	2	1	2	2	1	1	2	2	2	4	1	1	12
2012	2	1	2	2	1	0	0	1	0	2	2	2	2	2	2	5	0	1	1	2	1	0	0	52
2012	2	1	1	1	2	0	2	2	1	1	2	1	2	2	2	1	1	1	2	3	5	1	1	19
2012	2	2	2	3	1	0	0	2	0	1	1	2	2	2	1	1	1	1	1	2	1	1	1	13
2012	2	2	2	1	1	0	0	1	0	1	1	1	2	2	2	2	2	1	1	2	1	1	1	11
2012	2	1	2	1	1	0	0	1	0	1	2	2	1	2	2	1	1	2	2	1	3	0	0	37
2012	2	2	1	1	1	0	0	1	0	1	1	2	2	2	1	1	1	1	1	2	1	0	0	29
2012	1	2	1	1	2	1	1	2	1	2	1	2	1	2	2	2	2	1	1	2	1	0	1	47
2012	2	2	1	3	2	1	0	1	0	2	1	2	2	2	1	1	1	1	2	1	2	1	1	21
2012	2	1	3	3	2	0	1	2	1	2	1	1	1	2	2	3	3	1	1	1	2	1	1	9
2012	2	1	1	2	2	0	2	1	1	1	1	2	2	2	1	1	1	2	2	2	4	1	1	37
2012	1	1	1	1	1	1	1	1	1	1	1	2	2	2	1	1	1	1	1	2	1	0	0	41
2012	1	1	2	1	1	0	0	1	0	1	1	2	2	2	1	1	1	1	1	1	2	0	0	51
2012	2	1	2	1	1	1	0	1	0	1	2	2	1	2	2	1	1	1	1	2	1	1	1	34
2012	1	2	1	1	2	0	0	1	0	2	1	2	1	2	2	2	2	1	1	2	1	1	1	20
2012	1	2	1	1	2	0	2	1	1	1	2	1	2	2	2	1	1	2	2	1	3	0	0	51
2012	2	2	1	3	2	1	2	1	1	1	2	2	1	2	2	1	1	2	2	1	3	0	0	50
2012	1	1	2	1	2	0	0	1	0	1	2	2	2	2	2	5	0	2	2	2	4	1	1	2
2012	1	2	2	1	1	0	0	1	0	2	2	2	2	1	2	1	1	1	1	2	1	1	1	32
2012	2	2	1	1	2	1	0	1	0	2	1	2	1	2	2	2	2	1	1	2	1	1	1	32
2012	1	2	2	3	2	1	0	1	0	1	2	2	1	2	2	1	1	1	1	3	5	0	0	54
2012	1	2	1	1	2	0	0	2	0	2	1	2	2	2	1	1	1	1	1	2	1	0	0	48
2012	1	2	1	1	1	0	0	2	0	1	1	1	2	2	2	2	2	1	2	1	2	0	0	48
2012	2	2	2	1	2	1	1	2	1	1	2	2	2	1	2	1	1	1	2	2	1	1	1	10
2012	2	2	2	2	1	0	1	2	1	2	1	2	2	2	1	1	1	1	1	2	1	1	1	41
2012	1	1	1	3	2	1	2	2	1	1	2	2	2	2	2	5	0	1	1	2	1	0	0	32
2013	2	1	2	1	2	0	1	1	1	1	2	2	2	2	2	5	0	1	2	1	2	0	0	47
2013	2	1	2	1	2	1	2	1	1	1	1	1	2	2	2	2	2	1	1	2	1	1	1	29
2013	2	1	2	3	2	1	1	1	1	1	2	2	1	2	2	1	1	1	2	1	2	0	0	47
2013	2	2	1	1	1	0	0	2	0	1	1	2	1	2	2	2	2	1	1	2	1	0	0	43
2013	2	2	2	1	2	0	1	1	1	1	1	2	2	2	1	1	1	1	1	3	5	0	1	5
2013	1	1	2	1	2	0	2	1	1	1	1	2	2	2	1	1	1	2	2	3	5	1	1	9
2013	2	2	1	1	2	1	2	1	1	1	2	1	2	2	2	1	1	3	3	2	5	1	1	15
2013	2	2	2	1	2	1	2	2	1	1	1	2	2	2	1	1	1	1	1	2	1	0	0	45
2013	2	2	2	1	2	0	0	1	0	1	1	2	2	2	1	1	1	1	2	1	2	1	1	28
2013	1	1	2	1	2	0	0	1	0	1	2	1	2	2	2	1	1	2	2	1	3	0	0	43
2013	2	2	2	1	1	0	1	2	1	1	2	2	1	2	2	1	1	1	2	2	1	1	1	19
2013	2	2	2	1	2	1	0	1	0	2	2	2	2	2	2	5	0	1	1	2	1	0	0	42
2013	2	1	1	1	2	1	0	1	0	1	1	1	2	2	2	2	2	2	2	1	3	0	0	41
2013	1	1	2	3	2	1	2	1	1	1	2	1	2	2	2	1	1	2	2	2	4	1	1	14
2013	2	1	2	1	1	1	0	1	0	1	1	2	2	2	1	1	1	1	1	2	1	1	1	32
2013	2	2	1	1	2	0	0	2	0	2	1	2	1	2	2	2	2	1	1	2	1	1	1	27
2013	2	1	1	3	1	0	0	2	0	1	1	1	2	2	2	2	2	1	2	2	1	1	1	6
2013	2	2	2	1	2	1	0	1	0	1	2	1	1	2	2	2	2	2	2	2	4	1	1	18
2013	1	2	2	1	2	0	0	1	0	1	2	1	2	2	2	1	1	2	2	1	3	1	1	31
2013	2	1	1	1	2	0	1	1	1	1	1	2	1	2	2	2	2	1	1	2	1	0	1	18
2013	2	1	1	1	2	0	0	2	0	2	1	2	2	1	2	2	2	1	1	2	1	1	1	22
2013	1	1	2	1	1	0	0	1	0	1	2	1	2	2	2	1	1	1	1	2	1	1	1	39
2013	2	2	2	3	2	0	0	1	0	1	2	2	1	2	2	1	1	2	2	2	4	1	1	12
2013	1	2	2	1	2	1	0	2	0	2	1	2	2	2	1	1	1	1	1	1	2	1	1	8
2013	2	1	2	3	2	0	2	1	1	1	2	1	2	2	2	1	1	1	1	2	1	0	0	47
2013	2	2	2	1	1	0	2	1	1	1	1	2	2	2	1	1	1	2	1	2	1	1	1	21
2013	2	1	1	3	1	0	1	1	1	2	2	2	1	2	2	1	1	1	2	2	1	0	0	43
2013	2	1	1	1	2	0	0	2	0	1	1	2	2	2	1	1	1	1	1	2	1	1	1	2
2013	2	2	2	1	1	0	2	1	1	1	1	3	3	3	2	5	5	2	2	1	3	0	0	43
2013	1	2	2	3	2	0	2	2	1	1	2	2	1	2	2	1	1	2	2	2	4	1	1	5
2013	2	1	2	2	1	1	0	1	0	1	1	2	2	2	1	1	1	1	1	2	1	1	1	6
2013	1	1	1	1	1	1	0	1	0	2	1	2	2	2	1	1	1	1	1	2	1	0	0	40
2013	2	2	2	1	1	0	0	1	0	1	2	1	2	2	2	1	1	2	2	2	4	1	1	16
2013	2	1	2	1	2	1	0	1	0	1	2	2	1	2	2	1	1	1	1	1	2	1	1	15
2013	2	1	2	1	2	0	1	1	1	1	1	1	2	2	2	2	2	2	2	2	4	1	1	15
2013	2	2	2	3	2	1	0	2	0	1	1	2	1	2	2	2	2	1	2	2	1	1	1	4
2013	2	2	2	1	1	0	0	1	0	1	2	2	2	2	2	5	0	2	2	2	4	1	1	3
2013	1	2	1	3	2	1	0	2	0	1	1	2	2	2	1	1	1	1	1	2	1	0	0	37
2013	2	2	2	3	2	1	0	1	0	1	1	1	2	2	2	2	2	1	1	1	2	0	0	39
2013	1	2	2	1	2	0	2	1	1	1	2	2	2	1	2	1	1	2	2	2	4	0	0	39
2013	2	1	1	2	2	0	1	2	1	1	1	2	2	1	2	2	2	1	1	2	1	1	1	1
2013	2	1	2	1	1	0	0	1	0	1	2	2	1	2	2	1	1	2	2	1	3	0	0	41
2013	2	1	1	1	1	1	0	1	0	2	2	2	2	2	2	5	0	1	2	2	1	0	0	38
2014	2	2	2	3	1	0	0	1	0	1	1	2	2	2	1	1	1	2	2	1	3	0	0	34
2013	2	1	1	1	1	1	2	1	1	1	1	2	1	2	2	2	2	1	1	2	1	0	0	39
2014	2	2	1	1	2	0	1	2	1	1	2	2	2	2	2	5	0	1	2	1	2	0	0	33
2013	2	1	1	1	1	0	0	2	0	2	1	2	2	2	1	1	1	1	1	2	1	0	0	40
2013	2	1	1	1	1	0	0	1	0	1	1	2	2	2	1	1	1	1	1	2	1	0	0	36
2014	2	2	2	3	2	1	0	2	0	2	1	2	2	2	1	1	1	1	3	2	5	1	1	13
2014	2	1	3	3	2	1	2	1	1	1	2	1	2	2	2	1	1	2	2	1	3	0	0	32
2013	2	2	2	1	2	1	2	1	1	1	2	2	1	2	2	1	1	1	1	1	2	0	0	36
2014	2	2	2	3	2	0	2	1	1	1	1	2	1	2	2	2	2	2	2	2	4	1	1	6
2014	2	2	2	2	2	0	2	1	1	2	1	2	2	2	1	1	1	2	2	2	4	1	1	0
2013	1	1	2	1	2	0	0	1	0	1	2	1	1	2	2	2	2	2	2	2	4	1	1	34
2013	1	2	1	1	1	1	0	1	0	1	1	2	2	2	1	1	1	1	2	2	1	1	1	33
2014	2	1	1	2	1	0	1	1	1	1	1	2	2	2	1	1	1	1	2	2	1	1	1	32
2014	1	1	1	1	2	1	2	1	1	1	1	2	2	2	1	1	1	1	2	2	1	1	1	7
2014	2	2	2	3	2	1	0	1	0	1	1	1	2	2	2	2	2	1	1	2	1	0	0	29
2014	2	2	2	1	2	1	0	1	0	1	1	2	2	2	1	1	1	1	1	1	2	1	1	19
2014	1	2	2	1	1	0	0	1	0	1	1	1	2	2	2	2	2	2	2	1	3	0	0	30
2014	1	1	1	1	2	1	2	2	1	2	1	1	2	2	2	2	2	1	1	2	1	0	0	34
2014	1	2	2	1	1	1	0	1	0	1	2	2	1	2	2	1	1	1	2	1	2	1	1	0
2014	2	1	2	3	1	0	2	1	1	1	1	1	2	2	2	2	2	1	2	1	2	1	1	24
2014	2	1	2	1	2	0	2	2	1	1	1	2	2	2	1	1	1	1	1	3	5	0	0	33
2014	2	2	1	2	2	1	1	1	1	2	1	2	2	2	1	1	1	1	1	2	1	1	1	8
2014	2	1	1	1	2	0	0	1	0	2	1	2	2	2	1	1	1	1	2	2	1	0	0	28
2014	2	2	1	3	2	0	0	2	0	2	1	2	1	2	2	2	2	1	1	2	1	1	1	14
2014	2	2	2	1	1	0	2	1	1	2	2	1	2	2	2	1	1	1	2	2	1	0	0	31
2014	2	2	1	1	2	1	0	1	0	1	1	2	2	2	1	1	1	1	1	1	2	0	0	29
2014	1	2	2	1	2	0	0	2	0	1	2	2	1	2	2	1	1	2	2	2	4	1	1	13
2014	2	2	1	1	1	0	0	1	0	2	2	2	2	2	2	5	0	1	2	2	1	0	0	26
2014	1	2	2	3	2	1	0	1	0	1	2	2	1	1	2	2	2	1	2	2	1	0	1	0
2014	2	2	2	1	1	1	1	2	1	2	1	2	2	2	1	1	1	1	2	2	1	0	0	30
2014	1	1	1	1	1	1	0	1	0	1	1	1	2	2	2	2	2	2	2	1	3	0	0	26
2014	2	1	2	1	2	0	0	2	0	1	2	2	2	2	2	5	0	2	2	2	4	1	1	11
2014	2	2	2	1	2	1	0	1	0	1	2	2	2	2	2	5	0	2	2	2	4	1	1	9
2014	2	1	2	1	2	0	0	1	0	1	1	2	1	2	2	2	2	1	1	2	1	1	1	8
2014	2	1	1	3	2	0	0	2	0	1	1	2	2	2	1	1	1	1	1	2	1	0	0	24
2014	2	2	1	2	1	0	0	2	0	2	1	2	2	2	1	1	1	1	2	2	1	1	1	27
2015	1	1	2	1	2	1	0	1	0	1	1	2	2	2	1	1	1	1	1	1	2	0	0	22
2014	1	2	2	1	1	0	2	1	1	1	2	2	2	1	2	1	1	1	2	2	1	1	1	13
2015	2	1	1	3	1	0	1	2	1	2	1	2	2	2	1	1	1	1	1	2	1	0	0	21
2014	2	2	2	1	2	1	0	1	0	1	2	1	2	2	2	1	1	1	2	2	1	1	1	14
2015	1	1	1	1	1	0	2	2	1	2	1	2	2	2	1	1	1	1	1	2	1	0	0	20
2015	2	1	1	3	2	1	0	1	0	1	2	2	2	2	2	5	0	1	1	2	1	0	0	20
2015	1	2	1	3	2	1	2	1	1	2	2	2	2	2	2	5	0	2	2	2	4	1	1	11
2015	2	1	2	1	1	0	0	1	0	2	2	2	2	2	2	5	0	1	1	2	1	1	1	15
2014	2	1	2	1	2	0	2	1	1	1	1	2	2	2	1	1	1	2	2	2	4	1	1	20
2014	2	1	2	1	1	1	0	1	0	2	1	2	2	2	1	1	1	1	1	2	1	1	1	10
2015	2	2	2	1	1	0	0	1	0	1	2	2	2	2	2	5	0	1	1	1	2	0	0	20
2014	2	1	2	1	2	1	0	1	0	1	1	2	2	2	1	1	1	1	2	1	2	0	0	27
2014	1	3	2	1	1	0	0	1	0	1	1	2	2	2	1	1	1	1	1	1	2	0	0	27
2015	2	1	2	1	2	1	2	1	1	1	2	2	2	2	2	5	0	2	2	2	4	1	1	16
2015	2	2	1	2	2	1	0	1	0	1	2	2	2	2	2	5	0	1	1	2	1	1	1	12
2014	2	2	2	1	2	0	0	1	0	1	2	2	1	2	2	1	1	1	1	2	1	0	0	26
2015	2	2	2	1	1	1	0	1	0	1	2	2	2	2	2	5	0	2	2	2	4	0	0	16
2015	1	1	2	1	2	0	0	1	0	1	2	1	2	2	2	1	1	2	2	2	4	0	1	7
2015	1	2	2	3	1	1	0	1	0	1	1	2	2	1	2	2	2	2	2	2	4	1	1	6
2015	1	2	1	1	1	0	2	2	1	1	2	1	2	2	2	1	1	2	2	1	3	0	0	17
2015	2	2	1	1	2	0	2	2	1	1	2	2	1	2	2	1	1	1	1	2	1	1	1	10
2015	2	1	2	1	2	0	0	1	0	1	2	2	1	2	2	1	1	2	2	1	3	0	0	23
2015	2	2	2	1	2	1	2	1	1	1	1	1	1	2	2	3	3	1	1	2	1	1	1	11
2015	1	2	2	3	1	0	1	2	1	1	2	2	2	2	2	5	0	2	2	1	3	0	0	17
2015	2	1	1	1	1	0	1	1	1	1	2	2	2	2	2	5	0	1	1	2	1	0	0	19
2015	2	1	1	3	1	0	0	2	0	1	1	2	2	2	1	1	1	1	2	2	1	1	1	12
2015	2	2	2	3	1	0	0	1	0	1	1	2	2	2	1	1	1	1	2	2	1	1	1	18
2015	2	2	2	3	2	0	0	1	0	1	2	1	2	1	2	2	2	2	2	1	3	0	0	6
2015	1	1	2	1	2	1	0	2	0	1	1	1	2	2	2	2	2	1	1	1	2	1	1	6
2015	1	2	2	1	1	0	0	1	0	1	2	2	1	2	2	1	1	1	1	1	2	0	0	20
2015	2	2	2	1	2	0	2	1	1	2	1	1	1	2	2	3	3	1	1	2	1	1	1	4
2015	2	1	2	3	2	1	2	1	1	1	1	1	1	2	2	3	3	1	1	2	1	0	0	18
2015	1	1	2	1	2	1	2	1	1	1	2	1	2	2	2	1	1	2	2	1	3	0	0	18
2015	2	1	2	3	2	0	2	1	1	1	2	1	1	2	2	2	2	2	2	2	4	1	1	15
2015	1	2	1	2	1	0	0	1	0	1	1	2	2	2	1	1	1	1	1	2	1	0	0	16
2015	1	3	2	1	1	0	0	1	0	1	1	1	2	2	2	2	2	2	2	1	3	0	0	16
2015	2	2	1	1	1	0	0	1	0	1	1	2	2	2	1	1	1	2	2	2	4	1	1	4
2015	2	2	1	1	2	1	0	1	0	1	2	1	2	2	2	1	1	1	1	2	1	0	0	19
2015	2	2	2	3	2	1	0	2	0	1	2	2	2	1	2	1	1	2	2	2	4	0	0	16
2015	2	2	2	1	2	0	0	2	0	2	1	2	2	2	1	1	1	1	1	1	2	0	0	12
2015	2	2	1	1	1	1	0	1	0	1	1	1	2	2	2	2	2	1	1	1	2	0	0	19
2015	1	1	2	1	2	1	0	1	0	1	1	1	2	2	2	2	2	2	2	1	3	0	0	23
2015	1	2	2	1	2	0	0	1	0	1	2	2	1	2	2	1	1	2	2	2	4	0	0	12
2015	2	1	2	3	1	1	0	1	0	1	1	2	2	2	1	1	1	1	1	3	5	0	0	12
2015	2	1	3	3	2	0	2	1	1	2	2	2	1	2	2	1	1	3	3	3	5	0	1	2
2015	1	2	1	1	1	0	0	2	0	1	2	2	1	2	2	1	1	1	2	1	2	0	0	12
2015	2	1	2	1	2	0	0	1	0	1	1	2	1	2	2	2	2	1	1	1	2	0	0	13
2015	2	1	2	1	1	0	0	1	0	1	1	2	2	2	1	1	1	1	2	2	1	0	0	16
2015	1	2	2	1	1	0	2	1	1	1	2	2	1	2	2	1	1	2	2	1	3	0	0	14
2013	2	3	2	1	2	1	0	1	0	1	1	1	1	2	2	3	3	1	1	1	2	1	1	1
2014	1	3	1	1	2	1	0	1	0	1	1	2	2	2	1	1	1	2	2	1	3	0	0	31
[truncated: 2,539 more rows]
